# Supplementary material for: An interrupted Corey–Chaykovsky reaction of designed azaarenium salts: synthesis of complex polycyclic spiro- and fused cyclopropanoids
Source: Royal Society of Chemistry journal article supplement (doi:10.1039/d3sc01578e), 2023-01-01

## Supporting Information

for

### An Interrupted Corey-Chaykovsky Reaction of Designed Azaarenium Salts: Synthesis of Complex Polycyclic Spiro- and Fused Cyclopropanoids

Bara Singh,<sup>#</sup> Arshad J. Ansari,<sup>#</sup> Nirmal Malik and S. S. V. Ramasastry\*

Department of Chemical Sciences, Indian Institute of Science Education and Research (IISER)  
Mohali, Sector 81, S A S Nagar, Manauli PO, Punjab 140 306, India

<sup>#</sup>Contributed equally to this work

E-mail: ramsastry@iisermohali.ac.in

| S. No. | Contents                                                                                                                        | Page No. |
|--------|---------------------------------------------------------------------------------------------------------------------------------|----------|
| 1      | General experimental methods                                                                                                    | S2       |
| 2      | General procedure-1: Synthesis of 2-formyl boronic acids ( <b>AC</b> )                                                          | S3       |
| 3      | General procedure-2: Synthesis of enone-tethered pyridines ( <b>6a-6i</b> , and <b>6k-6o</b> )- and quinolines ( <b>7a-7k</b> ) | S3       |
| 4      | General procedure-3: Synthesis of enone-tethered pyridines ( <b>6p</b> and <b>6q</b> )                                          | S4       |
| 5      | General procedure-4: Synthesis of enone-tethered pyridines ( <b>6j</b> and <b>6z</b> ) and quinoline ( <b>7l</b> )              | S5       |
| 6      | General procedure-5: Synthesis of enone-tethered pyridinium ( <b>2a-2z</b> )- and quinolinium salts ( <b>4a-4m</b> )            | S21      |
| 7      | General procedure-6: Synthesis of vicinal bis-spirocyclic indanones ( <b>3</b> )                                                | S21      |
| 8      | General procedure-7: Synthesis of polycyclic benzocycloheptanones ( <b>5a-5m</b> )                                              | S34      |
| 9      | General procedure-8: One-pot synthesis of pyridinium salts and spiroannulation                                                  | S41      |
| 10     | General procedure-9: Reaction of <b>2a</b> with trideuteromethyl sulfoxonium iodide (TDMSOI)                                    | S41      |
| 11     | General procedure-10: To study the role of the pyridinium portion                                                               | S42      |
| 12     | General procedure-11: To study the role of the enone moiety                                                                     | S45      |
| 13     | General procedure-12: Reaction of <b>2a</b> in the presence of proton sponge                                                    | S45      |
| 14     | Crystal Structure of <b>3a</b> (CCDC 2133525)                                                                                   | S46      |
| 15     | Crystal Structure of <b>3a'</b> (CCDC 2133527)                                                                                  | S47      |
| 16     | Crystal Structure of <b>5a</b> (CCDC 2143316)                                                                                   | S48      |
| 17     | Copies of <sup>1</sup> H, <sup>13</sup> C, and <sup>19</sup> F NMR spectra of all the new compounds reported in this study      | S49      |

**General experimental methods:** All the reagents, solvents, and catalysts employed in this study were procured from Sigma-Aldrich and were used without further purification. For thin-layer chromatography (TLC), silica aluminum foils with fluorescent indicator 254 nm (from Aldrich) were used, and compounds were visualized by irradiation with UV light and/or by treatment with a solution of *p*-anisaldehyde (23 mL), conc. H<sub>2</sub>SO<sub>4</sub> (35 mL) and acetic acid (10 mL) in ethanol (900 mL) followed by heating. Column chromatography was performed using SD Fine silica gel 60-120 mesh (approximately 15–20 g per 1 g of the crude product). Dry THF was obtained by distillation over sodium and stored over sodium wire. As indicated, IR spectra were recorded on a Perkin–Elmer FT IR spectrometer as thin films or KBr pellets, with  $\nu_{\text{max}}$  in inverse centimeters. Melting points were recorded on a digital melting point apparatus Stuart SMP30. <sup>1</sup>H NMR, <sup>13</sup>C NMR, and <sup>19</sup>F NMR spectra were recorded on a 400 and 500 MHz Bruker Biospin Avance III FT-NMR spectrometer. NMR shifts are reported as delta ( $\delta$ ) units in parts per million (ppm), and coupling constants (*J*) are reported in Hertz (Hz). The following abbreviations are utilized to describe peak patterns when appropriate: br=broad, s=singlet, d=doublet, t=triplet, q=quartet, and m=multiplet. Proton chemical shifts are given in  $\delta$  relative to tetramethylsilane ( $\delta$  0.00 ppm) in CDCl<sub>3</sub> ( $\delta$  7.26 ppm) or in (CD<sub>3</sub>)<sub>2</sub>SO ( $\delta$  2.50 ppm). Carbon chemical shifts are internally referenced to the deuterated solvent signals in CDCl<sub>3</sub> ( $\delta$  77.1 ppm) or ((CD<sub>3</sub>)<sub>2</sub>SO ( $\delta$  39.5 ppm). Single crystal X-ray analysis was carried out on a Rigaku XtaLAB mini diffractometer. High-resolution mass spectra were recorded on a Waters QTOF mass spectrometer.

### General procedure-1: Synthesis of 2-formyl boronic acids (AC)

All 2-formyl boronic acids were synthesized according to the reported literature.<sup>1</sup>

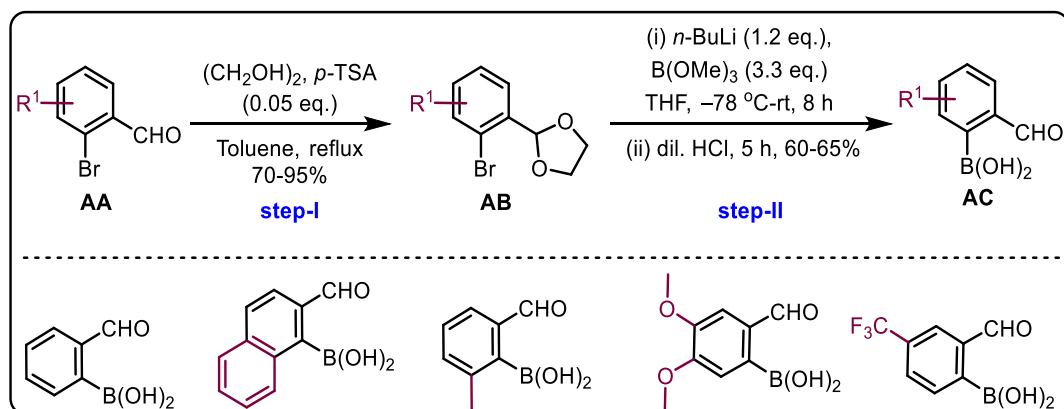

**Scheme S1:** Synthesis of 2-formyl boronic acids AC

### General procedure-2: Synthesis of enone-tethered pyridines (6a-6i, and 6k-6o)- and quinolines (7a-7k)

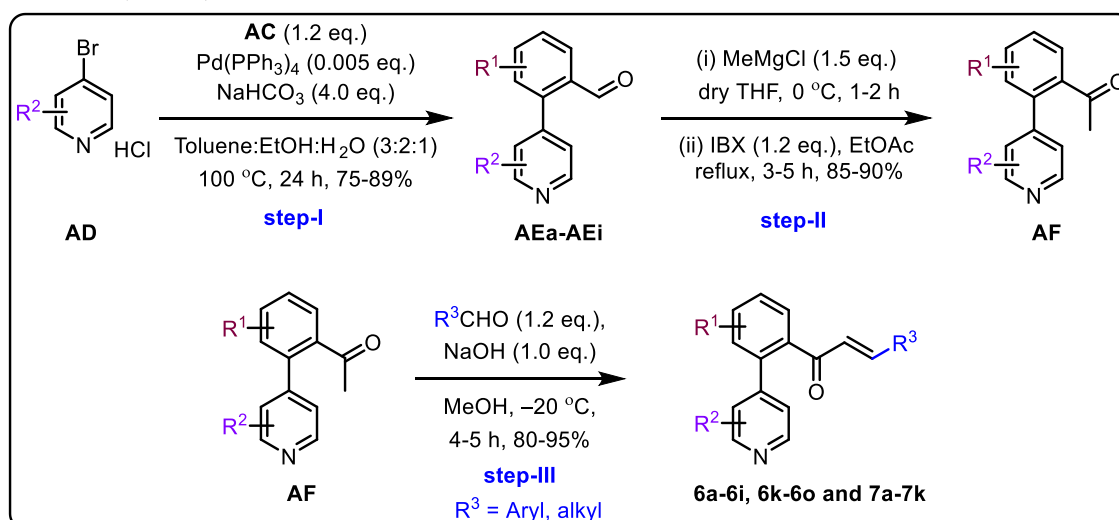

**Scheme S2:** General representation of the synthesis of enone-tethered pyridines and quinolines (6a-6i, 6k-6o and 7a-7k)

**A representative procedure for the synthesis of AEa-AEi (Scheme S2, step I):** Pd(PPh<sub>3</sub>)<sub>4</sub> (0.005 mmol), NaHCO<sub>3</sub> (4.0 mmol), 4-bromopyridine hydrochloride or 4-bromoquinolines AD (1.0 mmol), corresponding boronic acid (1.2 mmol), and toluene (3.0 mL), EtOH (2.0 mL) and H<sub>2</sub>O (2.0 mL) were added to a sealed tube. The reaction mixture was degassed with nitrogen, and the resulting solution was stirred at 100 °C for 24 h. After the reaction completed (TLC), the reaction was quenched with saturated aq. NH<sub>4</sub>Cl and extracted using ethyl acetate. The organic extracts were combined, dried over anhydrous sodium sulfate, and concentrated. The crude product was purified by silica gel column chromatography using hexane-ethyl acetate to afford biaryl aldehydes AEa-AEi (yield 75-89%).

<sup>1</sup> a) Adamczyk-Woźniak, A. A.; Ejsmont, K.; Gierczyk, B.; Kaczorowska, E.; Matuszewska, A.; Schroeder, G.; Sporzynski, A.; Zarychta, B. *J. Organomet. Chem.* **2015**, 788, 36. b) Tseng, N. -W.; Lautens, M. *J. Org. Chem.* **2009**, 74, 1809.

**A representative procedure for the synthesis of AF (Scheme S2, step II):** An oven-dried 25 mL RB flask was charged with biaryl aldehydes **AE** in 10 mL dry THF and placed at 0 °C under an N<sub>2</sub> atmosphere. Then, methyl magnesium chloride (3.0 M in THF, 1.5 eq.) was added drop wise at the same temperature and stirred for 1 h. Upon completion, the reaction mixture was quenched with water (~2-3 mL) and extracted with ethyl acetate (2x5 mL). The organic extracts were combined, dried over anhydrous Na<sub>2</sub>SO<sub>4</sub>, and concentrated under reduced pressure. The crude product was forwarded to the next step without any purification.

The crude product was dissolved in ethyl acetate and added IBX (1.2 eq.), and stirred at 80 °C. The reaction progress was monitored by TLC, and on completion, the reaction mixture was filtered through a celite pad and washed with ethyl acetate (2x3 mL). The combined organic layers were washed with brine, dried over anhydrous Na<sub>2</sub>SO<sub>4</sub>, and concentrated under reduced pressure. The residue was purified by silica gel column chromatography using hexane/ethyl acetate (5:1) as eluent to afford biaryl ketones **AF** (yield 85-90%).

**A representative procedure for the synthesis of 6a-6i, 6k-6o, and 7a-7k (Scheme S2, step III):** The biaryl ketones **AF** and the corresponding aldehydes (1.2 eq.) were dissolved in MeOH, and KOH (1.0 eq.) was introduced at -20 °C for 2 h. Then, the reaction mixture was shifted to room temperature and stirred for 30 min, monitored the reaction (by TLC) till the complete consumption of the starting material. The reaction mixture was quenched with saturated aqueous NH<sub>4</sub>Cl solution (~2-3 mL) and extracted with ethyl acetate (2x5 mL). The combined organic layers were dried over anhydrous Na<sub>2</sub>SO<sub>4</sub> and concentrated under reduced pressure. The residue was purified by silica gel column chromatography using hexane/ethyl acetate (5:1) as eluent to afford biaryl ketone **6a-6i**, **6k-6o**, and **7a-7k** (yield 80-95%).

### General procedure-3: Synthesis of enone-tethered pyridinium salts (**6p** and **6q**)

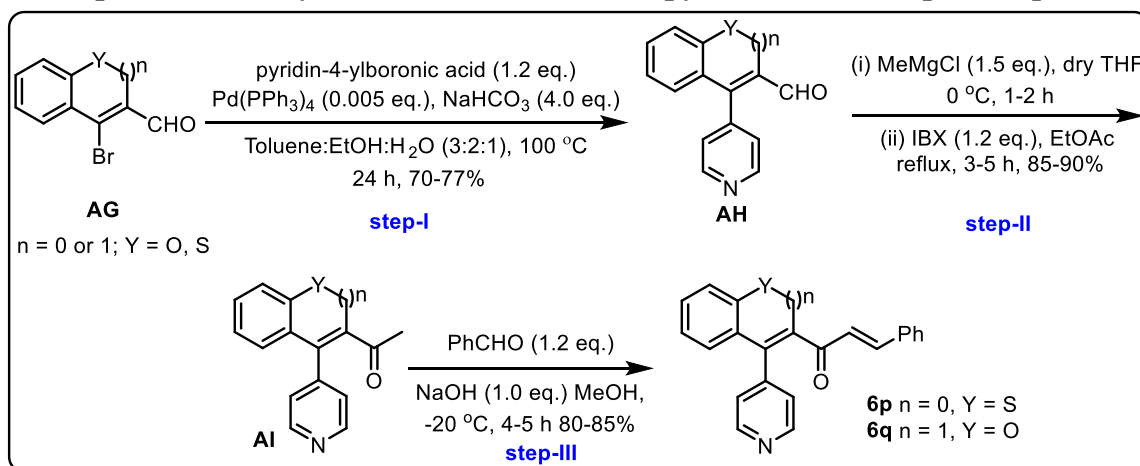

**Scheme S3:** General representation for the synthesis of **6p** and **6q**

**A representative procedure for the synthesis of AH (Scheme S3, step I):** Pd(PPh<sub>3</sub>)<sub>4</sub> (0.005 mmol), NaHCO<sub>3</sub> (4.0 mmol), bromides **AG** (1.0 mmol), pyridin-4-ylboronic acids (1.2 mmol), and toluene (3.0 mL), EtOH (2.0 mL) and H<sub>2</sub>O (2.0 mL) were added to a sealed tube. The reaction mixture was degassed with nitrogen, and the resulting solution was stirred at 100 °C for 24 h. After the reaction completed (by TLC), the reaction mixture was quenched



with saturated aq.  $\text{NH}_4\text{Cl}$  solution and extracted using ethyl acetate. The organic extracts were combined, dried over anhydrous  $\text{Na}_2\text{SO}_4$ , and concentrated. The crude product was purified by silica gel column chromatography using hexane/ethyl acetate as eluent to afford biaryl aldehydes **AH** (yield 70-77%). The biaryl aldehydes **AH** were subjected to further transformation to obtain corresponding enone **6p** and **6q**, as mentioned in Scheme S2.

#### General procedure 4: Synthesis of enone-tethered pyridinium salts (**6j**, **6z**, and **7l**)

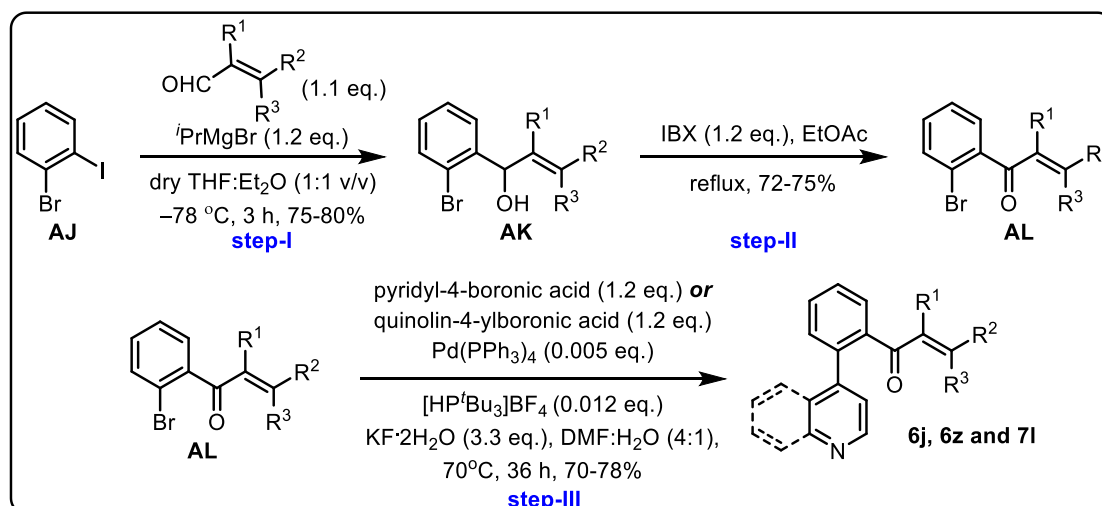

**Scheme S4:** General representation for the synthesis of **6j**, **6z**, and **7l**

**A representative procedure for the synthesis of AL (Scheme S4, steps I and II):** All the 2-bromo-enones were synthesized according to the reported literature.<sup>2</sup>

**A representative procedure for the synthesis of 6j, 6z, and 7l (Scheme S4, step III):**  $\text{Pd}(\text{PPh}_3)_4$  (0.005 mmol),  $[\text{HP}^t\text{-Bu}_3]\text{BF}_4$  (0.012 mmol), enone (1.0 mmol), pyridin-4-ylboronic acids (1.2 mmol),  $\text{KF}$  (3.3 mmol) and  $\text{H}_2\text{O}$  (60.0 mmol) were added to a sealed tube. The reaction tube was degassed with nitrogen,  $\text{DMF}$  (2.0 mL) was added using a syringe, and the resulting solution was stirred at 70 °C for 36 h. After the completion of the starting material, the reaction mixture was quenched with saturated aq.  $\text{NH}_4\text{Cl}$  solution and extracted using ethyl acetate. The organic extracts were combined, dried over anhydrous  $\text{Na}_2\text{SO}_4$ , and concentrated. The crude product was purified by silica gel column chromatography using hexane/ethyl acetate as eluent to afford enone-tethered pyridines **6j**, **6z**, and enone-tethered quinoline **7l**.

#### Spectral data of aldehydes and enones reported in this study

##### 2-(Pyridin-4-yl)benzaldehyde (AEa).

This compound was isolated as pale-yellow semi-solid by following the general procedure-2. 1000 mg of **AD** afforded 848 mg of **AEa** (89% yield).  $R_f = 0.4$  (3:7 EtOAc: Hexanes, visualized by 254 nm UV light). **IR (thin film, neat):**  $\nu_{\text{max}}/\text{cm}^{-1}$  2854, 1691, 1592, 1541,

<sup>2</sup> a) Patel, K.; Mishra, U. K.; Mukhopadhyay, D.; Ramasastry, S. S. V. *Chem. Asian J.* **2019**, *14*, 4568. b) Diemer, V.; Berthelot, A.; Bayardon, J.; Jugé, S.; Leroux, F. R.; Colobert, F. *J. Org. Chem.* **2012**, *77*, 14, 6117.

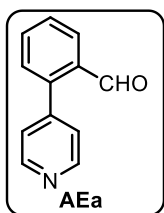

1474, 1407, 1257, 990, 830, 764, 642, 628. **<sup>1</sup>H NMR (500 MHz, CDCl<sub>3</sub>):** δ 9.98 (s, 1H), 8.72 (dt, *J* = 4.2, 1.5 Hz, 2H), 8.05 (dd, *J* = 7.8, 1.4 Hz, 1H), 7.69 (dd, *J* = 7.6, 1.3 Hz, 1H), 7.62-7.54 (m, 1H), 7.43 (dd, *J* = 7.8, 1.3 Hz, 1H), 7.33 (dt, *J* = 4.5, 1.3 Hz, 2H). **<sup>13</sup>C NMR (125 MHz, CDCl<sub>3</sub>):** δ 191.08, 149.80 (2C), 145.82, 142.67, 133.88, 133.42, 130.36, 129.01, 128.35, 124.72 (2C). **HRMS (ESI):** *m/z* calcd for C<sub>12</sub>H<sub>10</sub>NO (M+H)<sup>+</sup>: 184.0762, found: 184.0767.

### 3-Methyl-2-(pyridin-4-yl)benzaldehyde (AEb).

This compound was isolated as pale-yellow thick oil following the general procedure-2. 300 mg of **AD** afforded 246 mg of **AEb** (82% yield). *R<sub>f</sub>* = 0.4 (3:7 EtOAc: Hexanes, visualized by 254 nm UV light). **IR (thin film, neat):** *v*<sub>max</sub>/cm<sup>-1</sup> 2929, 1690, 1675, 1593, 1459, 1430, 1383, 1209, 912, 766. **<sup>1</sup>H NMR (400 MHz, CDCl<sub>3</sub>):** 9.69 (s, 1H), 8.78-8.70 (m, 2H), 7.88 (dd, *J* = 7.7, 1.4 Hz, 1H), 7.55 (d, *J* = 7.6 Hz, 1H), 7.47 (t, *J* = 7.7 Hz, 1H), 7.25-7.19 (m, 2H), 2.13 (s, 3H). **<sup>13</sup>C NMR (100 MHz, CDCl<sub>3</sub>):** δ 191.43, 149.91, 145.52, 142.00, 136.56, 135.75, 133.71, 132.15, 132.05, 128.62, 125.64, 124.88, 19.92. **HRMS (ESI):** *m/z* calcd for C<sub>13</sub>H<sub>12</sub>NO (M+H)<sup>+</sup> 198.0919, found: 198.0922.

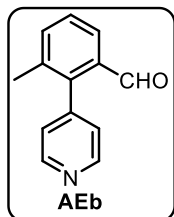

### 4,5-Dimethoxy-2-(pyridin-4-yl)benzaldehyde (AEc).

This compound was isolated as pale-yellow semisolid by following the general procedure-2. 250mg of **AD** afforded 258 mg of **AEc** (82% yield). *R<sub>f</sub>* = 0.3 (4:6 EtOAc: Hexanes, visualized by 254 nm UV light). **IR (thin film, neat):** *v*<sub>max</sub>/cm<sup>-1</sup> 2930, 1659, 1594, 1507, 1438, 1355, 1223, 1094, 1064, 920, 887, 831, 724, 659. **<sup>1</sup>H NMR (400 MHz, CDCl<sub>3</sub>):** δ 9.82 (s, 1H), 8.78-8.63 (m, 2H), 7.56 (s, 1H), 7.37-7.26 (m, 2H), 6.83 (s, 1H), 4.00 (s, 6H). **<sup>13</sup>C NMR (100 MHz, CDCl<sub>3</sub>):** δ 189.91, 153.64, 149.78 (2C), 149.55, 145.61, 138.13, 126.76, 125.00 (2C), 112.05, 109.05, 56.38, 56.24. **HRMS (ESI):** *m/z* calcd for C<sub>14</sub>H<sub>14</sub>NO<sub>3</sub> (M+H)<sup>+</sup>: 244.0974, found: 244.0981.

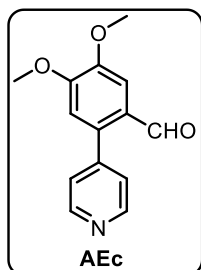

### 2-(Pyridin-4-yl)-5-(trifluoromethyl)benzaldehyde (AEd).

This compound was isolated as pale-yellow oil by following the general procedure-2. 200 mg of **AD** afforded 210 mg of **AEd** (81% yield), *R<sub>f</sub>* = 0.4 (3:7 EtOAc: Hexanes, visualized by 254 nm UV light). **IR (thin film, neat):** *v*<sub>max</sub>/cm<sup>-1</sup> 2851, 1687, 1591, 1573, 1498, 1460, 1239, 957, 807. **<sup>1</sup>H NMR (400 MHz, CDCl<sub>3</sub>):** δ 9.99 (s, 1H), 8.82-8.73 (m, 2H), 8.38-8.28 (m, 1H), 7.95 (ddd, *J* = 8.1, 1.9, 0.7 Hz, 1H), 7.60 (dt, *J* = 7.9, 0.7 Hz, 1H), 7.39-7.32 (m, 2H). **<sup>13</sup>C NMR (100 MHz, CDCl<sub>3</sub>):** δ 189.64, 150.11 (2C), 145.67 (apparent q, *J*<sub>C-F</sub> = 0.92 Hz), 144.45, 133.74, 131.59 (q, *J*<sub>C-F</sub> = 33.4 Hz), 131.18, 130.18 (q, *J*<sub>C-F</sub> = 3.5 Hz), 125.48 (q, *J*<sub>C-F</sub> = 3.7 Hz), 124.45 (2C), 123.34 (q, *J*<sub>C-F</sub> = 270.9 Hz). **<sup>19</sup>F NMR (376 MHz, CDCl<sub>3</sub>):** δ -62.98. **HRMS (ESI):** *m/z* calcd for C<sub>13</sub>H<sub>9</sub>F<sub>3</sub>NO (M+H)<sup>+</sup> 252.0636 found: 252.0654.

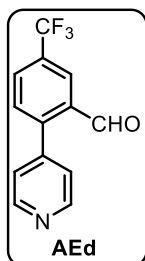

### 2-(3-Methylpyridin-4-yl)benzaldehyde (AEe).

This compound was isolated as pale-yellow semi-solid by following the general procedure-2.

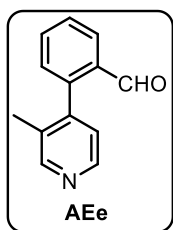

260 mg of **AD** afforded 225 mg of **AEe** (75% yield),  $R_f = 0.4$  (3:7 EtOAc: Hexanes, visualized by 254 nm UV light). **IR (thin film, neat):**  $\nu_{\max}/\text{cm}^{-1}$  1693, 1591, 1571, 1544, 1474, 1403, 1361, 1297, 1061, 992, 836, 813.  **$^1\text{H}$  NMR (500 MHz,  $\text{CDCl}_3$ ):**  $\delta$  9.76 (s, 1H), 8.56 (s, 1H), 8.52 (dd,  $J = 5.1, 2.2$  Hz, 1H), 8.05 (d,  $J = 7.8$  Hz, 1H), 7.71-7.68 (m, 1H), 7.60-7.56 (m, 1H), 7.27 (d,  $J = 7.5$  Hz, 1H), 7.15 (dd,  $J = 5.0, 1.9$  Hz, 1H), 2.11 (s, 3H).  **$^{13}\text{C}$  NMR (125 MHz,  $\text{CDCl}_3$ ):**  $\delta$  190.98, 150.92, 147.16, 145.91, 142.08, 134.05, 133.18, 131.57, 129.93, 128.80, 128.23, 124.35, 17.01. **HRMS (ESI):**  $m/z$  calcd for  $\text{C}_{13}\text{H}_{12}\text{NO}$  ( $\text{M}+\text{H}$ )<sup>+</sup> 198.0919, found: 198.0923.

### 2-(Quinolin-4-yl)benzaldehyde (AEf).

This compound was isolated as yellowish-brown oil by following the general procedure-2.

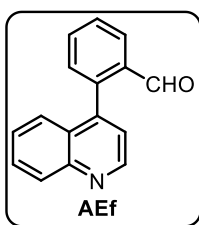

500 mg of **AD** afforded 439 mg of **AEf** (78% yield),  $R_f = 0.4$  (3:7 EtOAc: Hexanes, visualized by 254 nm UV light). **IR (thin film, neat):**  $\nu_{\max}/\text{cm}^{-1}$  2085, 1687, 1589, 1564, 1427, 1370, 1245, 1218, 1018, 821, 757.  **$^1\text{H}$  NMR (400 MHz,  $\text{CDCl}_3$ ):**  $\delta$  9.62 (s, 1H), 8.97 (d,  $J = 4.3$  Hz, 1H), 8.20 (d,  $J = 8.4$  Hz, 1H), 8.10 (dd,  $J = 7.7, 0.8$  Hz, 1H), 7.72-7.67 (m, 2H), 7.60 (t,  $J = 7.5$  Hz, 1H), 7.50-7.42 (m, 2H), 7.39 (d,  $J = 7.3$  Hz, 1H), 7.33 (d,  $J = 4.2$  Hz, 1H).  **$^{13}\text{C}$  NMR (100 MHz,  $\text{CDCl}_3$ ):** 190.83, 149.62, 148.15, 144.52, 140.93, 134.22, 133.92, 130.97, 129.97, 129.84, 129.14, 127.88, 127.73, 127.43, 125.54, 122.42. **HRMS (ESI):**  $m/z$  calcd for  $\text{C}_{16}\text{H}_{12}\text{NO}$  ( $\text{M}+\text{H}$ )<sup>+</sup> 234.0919 found 234.0918.

### 4,5-Dimethoxy-2-(quinolin-4-yl)benzaldehyde (AEg).

This compound was isolated as pale-yellow sticky oil following general procedure-2. 220 mg

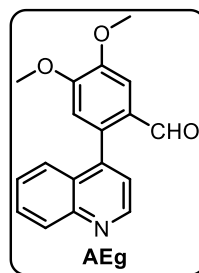

of **AD** afforded 252 mg of **AEg** (81% yield),  $R_f = 0.4$  (4:6 EtOAc: Hexanes, visualized by 254 nm UV light). **IR (thin film, neat):**  $\nu_{\max}/\text{cm}^{-1}$  2923, 1712, 1678, 1594, 1566, 1513, 1503, 1462, 1384, 1280, 1218, 1137, 1098, 875, 766.  **$^1\text{H}$  NMR (400 MHz,  $\text{CDCl}_3$ ):**  $\delta$  9.47 (s, 1H), 8.99 (d,  $J = 4.3$  Hz, 1H), 8.21 (dt,  $J = 8.4, 0.9$  Hz, 1H), 7.76 (ddd,  $J = 8.4, 6.6, 1.6$  Hz, 1H), 7.63 (s, 1H), 7.60-7.56 (m, 1H), 7.54-7.51 (m, 1H), 7.38 (d,  $J = 4.3$  Hz, 1H), 6.86 (s, 1H), 4.04 (s, 3H), 3.95 (s, 3H).  **$^{13}\text{C}$  NMR (100 MHz,  $\text{CDCl}_3$ ):**  $\delta$  189.6, 153.6, 149.6, 149.5, 148.2, 144.2, 136.1, 129.9, 129.8, 128.1, 127.6, 127.4, 125.6, 122.7, 112.7, 108.5, 56.4, 56.2. **HRMS (ESI):**  $m/z$  calcd for  $\text{C}_{18}\text{H}_{16}\text{NO}_3$  ( $\text{M}+\text{H}$ )<sup>+</sup> 294.1130, found: 294.1139.

### 1-(Quinolin-4-yl)-2-naphthaldehyde (AEh).

This compound was isolated as pale-yellow semi-solid by following the general procedure-2.

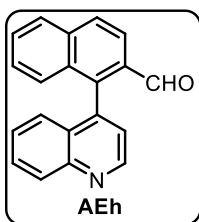

240 mg of **AD** afforded 279 mg of **AEh** (85% yield),  $R_f = 0.4$  (3:7 EtOAc: Hexanes, visualized by 254 nm UV light). **IR (thin film, neat):**  $\nu_{\max}/\text{cm}^{-1}$  3060, 2863, 1686, 1616, 1589, 1564, 1371, 1331, 1218, 913, 821, 778.  **$^1\text{H}$  NMR (400 MHz,  $\text{CDCl}_3$ ):**  $\delta$  9.67 (d,  $J = 0.9$  Hz, 1H), 9.08 (d,  $J = 4.3$  Hz, 1H), 8.33 – 8.24 (m, 1H), 8.17 (d,  $J = 8.7$  Hz, 1H), 8.08 (d,  $J = 8.7$  Hz, 1H),

7.99 (dt,  $J = 8.3, 1.0$  Hz, 1H), 7.74 (ddd,  $J = 8.4, 6.8, 1.5$  Hz, 1H), 7.62 (ddd,  $J = 8.2, 6.7, 1.3$  Hz, 1H), 7.47 (d,  $J = 4.3$  Hz, 1H), 7.37 (dtd,  $J = 8.3, 6.8, 1.3$  Hz, 2H), 7.27 (ddd,  $J = 16.8, 8.5, 1.3$  Hz, 2H).  $^{13}\text{C}$  NMR (100 MHz,  $\text{CDCl}_3$ ):  $\delta$  191.1, 149.5, 148.0, 142.5, 141.4, 136.0, 131.9, 131.5, 130.1, 129.9, 129.5, 129.2, 128.5, 128.4, 127.6, 127.5, 127.1, 125.9, 123.6, 122.2. HRMS (ESI):  $m/z$  calcd for  $\text{C}_{20}\text{H}_{14}\text{NO}$  ( $\text{M}+\text{H}^+$ ) 284.1075 found: 284.1081.

### 3-Methyl-2-(quinolin-4-yl)benzaldehyde (AEi).

This compound was isolated as yellowish-brown oil by following the general procedure-2.

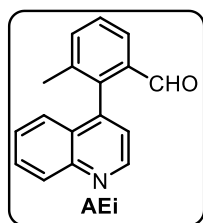

240 mg of **A** afforded 244 mg of **AEi** (85% yield),  $R_f = 0.4$  (3:7 EtOAc: Hexanes, visualized by 254 nm UV light). IR (thin film, neat):  $\nu_{\text{max}}/\text{cm}^{-1}$  2851, 1687, 1591, 1573, 1498, 1460, 1239, 957, 807.  $^1\text{H}$  NMR (400 MHz,  $\text{CDCl}_3$ ):  $\delta$  9.48 (s, 1H), 8.97 (dd,  $J = 4.2, 1.7$  Hz, 1H), 8.26 – 8.20 (m, 1H), 7.96 (dd,  $J = 7.7, 1.5$  Hz, 1H), 7.83 (dd,  $J = 8.6, 7.0$  Hz, 1H), 7.67 – 7.58 (m, 2H), 7.54 (t,  $J = 7.7$  Hz, 1H), 7.45 (dd,  $J = 7.0, 1.2$  Hz, 1H), 7.35 (dd,  $J = 8.5, 4.2$  Hz, 1H), 1.98 (s, 3H).  $^{13}\text{C}$  NMR (100 MHz,  $\text{CDCl}_3$ ):  $\delta$  191.95, 150.76, 148.21, 141.93, 138.34, 135.66, 135.21, 134.83, 133.78, 129.88, 128.94, 128.51, 128.33, 127.61, 125.13, 121.79, 19.65. HRMS (ESI):  $m/z$  calcd for  $\text{C}_{17}\text{H}_{14}\text{NO}$  ( $\text{M}+\text{H}^+$ ) 248.1075 found: 248.1073.

### 2-(7-Chloroquinolin-4-yl)benzaldehyde (AEj).

This compound was isolated as yellow solid by following the general procedure-2. 500 mg of

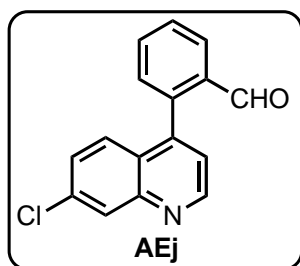

**AD** afforded 409 mg of **AEj** (88% yield),  $R_f = 0.4$  (3:7 EtOAc: Hexanes, visualized by 254 nm UV light). M.P = 110-113 °C. IR (thin film, neat):  $\nu_{\text{max}}/\text{cm}^{-1}$  3061, 2924, 1696, 1597, 1584, 1499, 1416, 1260, 1197, 1070, 882, 827, 766.  $^1\text{H}$  NMR (400 MHz,  $\text{CDCl}_3$ ):  $\delta$  9.62 (s, 1H), 8.96 (d,  $J = 4.3$  Hz, 1H), 8.17 (d,  $J = 1.0$  Hz, 1H), 8.10 (d,  $J = 7.7$  Hz, 1H), 7.73 (t,  $J = 7.4$  Hz, 1H), 7.65 (t,  $J = 7.7$  Hz, 1H), 7.41-7.38 (m, 3H), 7.33 (d,  $J = 4.3$  Hz, 1H).  $^{13}\text{C}$  NMR (100 MHz,  $\text{CDCl}_3$ ):  $\delta$  190.60, 150.71, 148.58, 144.79, 140.19, 135.81, 134.20, 134.02, 130.93, 129.41, 128.91, 128.43, 128.39, 126.94, 126.17, 122.49. HRMS (ESI):  $m/z$  calcd for  $\text{C}_{16}\text{H}_{11}\text{ClNO}$  ( $\text{M}+\text{H}^+$ ) 268.0529 found 268.0550.

### 2-(6,7-Dimethoxyquinolin-4-yl)benzaldehyde (AEk).

This compound was isolated as pale-yellow solid by following the general procedure-2. 500

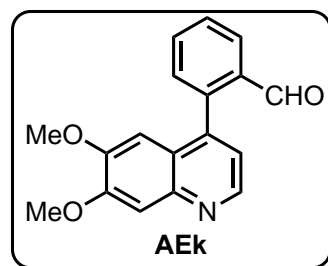

mg of **AD** afforded 424 mg of **AEk** (77% yield),  $R_f = 0.4$  (4:6 EtOAc: Hexanes, visualized by 254 nm UV light). M.P = 141-143 °C. IR (thin film, neat):  $\nu_{\text{max}}/\text{cm}^{-1}$  3061, 2928, 1694, 1619, 1595, 1494, 1432, 1351, 1293, 1216, 1120, 1090, 861, 766.  $^1\text{H}$  NMR (400 MHz,  $\text{CDCl}_3$ ):  $\delta$  9.62 (s, 1H), 8.76 (d,  $J = 4.4$  Hz, 1H), 8.10 (dd,  $J = 7.8, 1.2$  Hz, 1H), 7.72 (t,  $J = 7.4$  Hz, 1H), 7.61 (t,  $J = 7.8$  Hz, 1H), 7.48 (s, 1H), 7.42 (d,  $J = 7.5$  Hz, 1H), 7.18 (d,  $J = 4.4$  Hz, 1H), 6.64 (s, 1H), 4.02 (s, 3H), 3.71 (s, 3H).  $^{13}\text{C}$  NMR (100 MHz,  $\text{CDCl}_3$ ):  $\delta$  191.15, 152.58, 150.45, 147.41, 145.50, 142.38, 141.60, 134.06, 130.79, 129.08, 127.66, 123.17,

120.93, 108.41, 102.77, 102.75, 56.23, 55.92. **HRMS (ESI):**  $m/z$  calcd for  $C_{18}H_{16}NO_3$  ( $M+H^+$ ) 294.1130 found 294.1143.

### 3-(Pyridin-4-yl)benzo[*b*]thiophene-2-carbaldehyde (AHa).

This compound was isolated as reddish-brown sticky oil by following the general procedure-

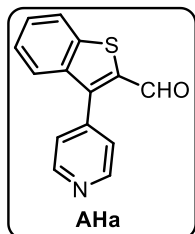

**3.** 300 mg of **AG** afforded 284 mg of **AHa** (82% yield),  $R_f = 0.4$  (3:7 EtOAc: Hexanes, visualized by 254 nm UV light). **IR (thin film, neat):**  $\nu_{max}/cm^{-1}$  2845, 2830, 1713, 1660, 1591, 1520, 1410, 1351, 1263, 1161, 989, 857, 764, 733.  **$^1H$  NMR (500 MHz,  $CDCl_3$ ):**  $\delta$  9.94 (s, 1H), 8.87-8.76 (m, 2H), 7.98-7.90 (m, 1H), 7.74 (dd,  $J = 8.3, 1.1$  Hz, 1H), 7.56 (ddd,  $J = 8.2, 7.1, 1.2$  Hz, 1H), 7.49-7.41 (m, 3H).  **$^{13}C$  NMR (125 MHz,  $CDCl_3$ ):**  $\delta$  184.72, 150.37 (2C), 143.87, 141.96, 140.47, 139.84, 138.44, 128.76, 125.71, 125.10 (2C), 124.81, 123.45, 123.45, 150.3 (2C), 143.8, 141.9, 140.4, 139.8, 138.4, 128.7, 125.7, 125.1 (2C), 124.8, 123.4. **HRMS (ESI):**  $m/z$  calcd for  $C_{14}H_{10}NOS$  ( $M+H^+$ )<sup>+</sup> 240.0483, found: 240.0479.

### (*E*)-3-Phenyl-1-(2-(pyridin-4-yl)phenyl)prop-2-en-1-one (6a).

This compound was isolated as pale-yellow sticky oil following general procedure-2. 500 mg

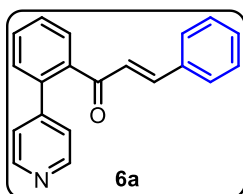

of **AF** afforded 643 mg of **6a** (89% yield),  $R_f = 0.4$  (4:6 EtOAc: Hexanes, visualized by 254 nm UV light). **IR (thin film, neat):**  $\nu_{max}/cm^{-1}$  2921, 2852, 1667, 1593, 1331, 1209, 1027, 983, 827, 760.  **$^1H$  NMR (400 MHz,  $CDCl_3$ ):**  $\delta$  8.59 (d,  $J = 6.1$  Hz, 2H), 7.66 (dd,  $J = 7.5, 1.5$  Hz, 1H), 7.60 (td,  $J = 7.5, 1.5$  Hz, 1H), 7.53 (td,  $J = 7.5, 1.4$  Hz, 1H), 7.45 (dd,  $J = 7.5, 1.4$  Hz, 1H), 7.40-7.29 (m, 8H), 6.74 (d,  $J = 16.0$  Hz, 1H).  **$^{13}C$  NMR (100 MHz,  $CDCl_3$ ):**  $\delta$  195.74, 149.91 (2C), 148.32, 145.62, 139.52, 138.19, 134.22, 130.95, 130.83, 130.04, 128.95 (2C), 128.93, 128.65, 128.34 (2C), 126.57, 123.79 (2C). **HRMS (ESI):**  $m/z$  calcd for  $C_{20}H_{16}NO$  ( $M+H^+$ )<sup>+</sup> 286.1232 found 286.1245.

### (*E*)-3-(Naphthalen-1-yl)-1-(2-(pyridin-4-yl)phenyl)prop-2-en-1-one (6b).

This compound was isolated as pale-yellow oil by following the general procedure-2. 150 mg

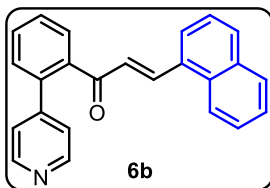

of **AF** afforded 204 mg of **6b** (80% yield),  $R_f = 0.4$  (3:7 EtOAc: Hexanes, visualized by 254 nm UV light). **IR (thin film, neat):**  $\nu_{max}/cm^{-1}$  3068, 1664, 1641, 1595, 1509, 1396, 1347, 1311, 1289, 1214, 1027, 979, 827, 779, 762.  **$^1H$  NMR (500 MHz,  $CDCl_3$ ):**  $\delta$  8.65-8.59 (m, 2H), 8.21 (d,  $J = 15.7$  Hz, 1H), 7.91-7.86 (m, 1H), 7.81 (ddd,  $J = 8.2, 7.1, 1.9$  Hz, 2H), 7.73 (dd,  $J = 7.6, 1.5$  Hz, 1H), 7.60 (td,  $J = 7.5, 1.5$  Hz, 1H), 7.55 (td,  $J = 7.5, 1.4$  Hz, 1H), 7.51-7.44 (m, 3H), 7.39-7.31 (m, 4H), 6.74 (d,  $J = 15.8$  Hz, 1H).  **$^{13}C$  NMR (125 MHz,  $CDCl_3$ ):**  $\delta$  195.37, 149.92 (2C), 148.48, 142.02, 139.74, 138.19, 133.65, 131.64, 131.44, 131.13, 131.01, 130.06, 129.13, 129.04, 128.83 (2C), 127.01, 126.30, 125.44, 125.33, 124.00, 123.11. **HRMS (ESI):**  $m/z$  calcd for  $C_{24}H_{18}NO$  ( $M+H^+$ )<sup>+</sup> 336.1388 found: 336.1379.

### (*E*)-3-(Pyren-1-yl)-1-(2-(pyridin-4-yl)phenyl)prop-2-en-1-one (6c).

This compound was isolated as yellowish-orange solid by following the general procedure-2.

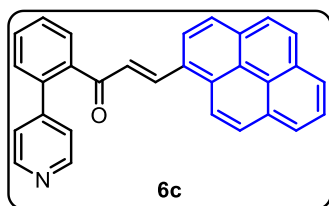

100 mg of **AF** afforded 166 mg of **6c** (80% yield), M.P = 163-167 °C.  $R_f = 0.3$  (3:7 EtOAc: Hexanes, visualized by 254 nm UV light). **IR (thin film, neat):**  $\nu_{\max}/\text{cm}^{-1}$  1659, 1637, 1592, 1580, 1317, 1286, 1214, 1023, 977, 844.  **$^1\text{H NMR}$  (500 MHz,  $\text{CDCl}_3$ ):**  $\delta$  8.66-8.59 (m, 2H), 8.49 (d,  $J = 15.7$  Hz, 1H), 8.15-8.09 (m, 3H), 8.03-7.98 (m, 2H), 7.97-7.88 (m, 3H), 7.78 (td,  $J = 6.0, 5.6, 3.0$  Hz, 2H), 7.60 (ddd,  $J = 14.7, 7.4, 1.5$  Hz, 2H), 7.47 (dd,  $J = 7.5, 1.5$  Hz, 1H), 7.40-7.34 (m, 2H), 6.88 (d,  $J = 15.7$  Hz, 1H).  **$^{13}\text{C NMR}$  (125 MHz,  $\text{CDCl}_3$ ):**  $\delta$  195.16, 149.92 (2C), 148.59, 141.69, 139.96, 138.28, 132.97, 131.20, 131.11, 130.54, 130.11, 130.06, 129.18, 128.84, 128.81, 128.72, 128.28, 127.99, 127.25, 126.30, 126.16, 125.94, 125.02, 124.76, 124.44, 124.15, 124.03 (2C), 122.11. **HRMS (ESI):**  $m/z$  calcd for  $\text{C}_{30}\text{H}_{20}\text{NO}$  ( $\text{M}+\text{H}$ )<sup>+</sup> 410.1545, found: 410.1555.

#### (*E*)-1-(2-(Pyridin-4-yl)phenyl)-3-(*p*-tolyl)prop-2-en-1-one (**6d**).

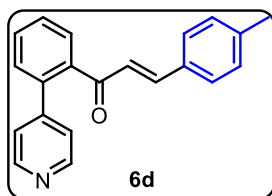

This compound was isolated as pale-yellow oil by following the general procedure-2. 100 mg of **AF** afforded 137 mg of **6d** (90% yield),  $R_f = 0.5$  (3:7 EtOAc: Hexanes, visualized by 254 nm UV light). **IR (thin film, neat):**  $\nu_{\max}/\text{cm}^{-1}$  2921, 2851, 1666, 1642, 1595, 1408, 1326, 1208, 1024, 983, 826, 760.  **$^1\text{H NMR}$  (400 MHz,  $\text{CDCl}_3$ ):**  $\delta$  8.62-8.52 (m, 2H), 7.64 (dd,  $J = 7.5, 1.5$  Hz, 1H), 7.58 (dd,  $J = 7.5, 1.6$  Hz, 1H), 7.53 (dd,  $J = 7.5, 1.4$  Hz, 1H), 7.45 (dd,  $J = 7.6, 1.4$  Hz, 1H), 7.34 (d,  $J = 16.1$  Hz, 1H), 7.31-7.27 (m, 2H), 7.23 (d,  $J = 7.9$  Hz, 2H), 7.13 (d,  $J = 7.9$  Hz, 2H), 6.69 (d,  $J = 16.0$  Hz, 1H), 2.33 (s, 3H).  **$^{13}\text{C NMR}$  (101 MHz,  $\text{CDCl}_3$ ):**  $\delta$  195.89, 149.85 (2C), 148.38, 145.86, 141.47, 139.63, 138.13, 131.47, 130.85, 130.02, 129.72 (2C), 128.90, 128.62, 128.39 (2C), 125.67, 123.80 (2C), 21.54. **HRMS (ESI):**  $m/z$  calcd for  $\text{C}_{21}\text{H}_{18}\text{NO}$  ( $\text{M}+\text{H}$ )<sup>+</sup> 300.1388 found 300.1386.

#### (*E*)-3-(4-Methoxyphenyl)-1-(2-(pyridin-4-yl)phenyl)prop-2-en-1-one (**6e**).

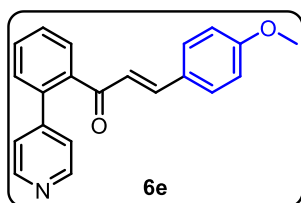

This compound was isolated as pale-yellow sticky oil following general procedure-2. 150 mg of **AF** afforded 227 mg of **6e** (95% yield),  $R_f = 0.3$  (4:6 EtOAc: Hexanes, visualized by 254 nm UV light). **IR (thin film, neat):**  $\nu_{\max}/\text{cm}^{-1}$  3054, 3025, 2839, 1663, 1636, 1592, 1569, 1251, 1172, 1025, 828, 775.  **$^1\text{H NMR}$  (400 MHz,  $\text{CDCl}_3$ ):**  $\delta$  8.57-8.56 (m, 2H), 7.63 (dd,  $J = 7.4, 1.1$  Hz, 1H), 7.60-7.49 (m, 1H), 7.53-7.49 (m, 1H), 7.44 (d,  $J = 7.4$  Hz, 1H), 7.34-7.28 (m, 5H), 6.83 (d,  $J = 8.6$  Hz, 2H), 6.61 (d,  $J = 16.0$  Hz, 1H), 3.79 (s, 3H).  **$^{13}\text{C NMR}$  (100 MHz,  $\text{CDCl}_3$ ):**  $\delta$  195.85, 161.89, 149.82 (2C), 148.44, 145.69, 139.78, 138.07, 130.73, 130.18 (2C), 129.99, 128.85, 128.60, 126.88, 124.44, 123.80 (2C), 114.44 (2C), 55.40. **HRMS (ESI):**  $m/z$  calcd for  $\text{C}_{21}\text{H}_{18}\text{NO}_2$  ( $\text{M}+\text{H}$ )<sup>+</sup> 316.1338, found: 316.1348.

#### (*E*)-3-(3,5-Dimethoxyphenyl)-1-(2-(pyridin-4-yl)phenyl)prop-2-en-1-one (**6f**).

This compound was isolated as pale-yellow sticky oil following general procedure-2. 120 mg

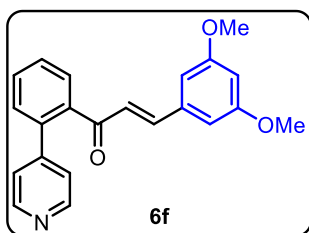

of **AF** afforded 170 mg of **6f** (81% yield),  $R_f = 0.3$  (4:6 EtOAc: Hexanes, visualized by 254 nm UV light). **IR (thin film, neat):**  $\nu_{\max}/\text{cm}^{-1}$  2923, 2839, 1666, 1641, 1589, 1542, 1456, 1426, 1284, 1203, 1154, 1064, 989, 828.  **$^1\text{H}$  NMR (400 MHz,  $\text{CDCl}_3$ ):**  $\delta$  8.59-8.51 (m, 2H), 7.63 (dd,  $J = 7.6, 1.5$  Hz, 1H), 7.56 (td,  $J = 7.5, 1.6$  Hz, 1H), 7.50 (td,  $J = 7.5, 1.5$  Hz, 1H), 7.41 (dd,  $J = 7.6, 1.4$  Hz, 1H), 7.31-7.20 (m, 3H), 6.63 (d,  $J = 16.0$  Hz, 1H), 6.42 (s, 3H), 3.71 (d,  $J = 1.6$  Hz, 6H).  **$^{13}\text{C}$  NMR (100 MHz,  $\text{CDCl}_3$ ):**  $\delta$  195.47, 160.94 (2C), 149.74 (2C), 148.44, 145.47, 139.38, 138.18, 136.07, 131.02, 130.05, 128.99, 128.67, 126.95, 123.86 (2C), 106.10 (2C), 103.08, 55.38, 55.35. **HRMS (ESI):**  $m/z$  calcd for  $\text{C}_{22}\text{H}_{20}\text{NO}_3$  ( $\text{M}+\text{H}^+$ ) 346.1443 found 346.1449.

### (*E*)-3-(3-Fluorophenyl)-1-(2-(pyridin-4-yl)phenyl)prop-2-en-1-one (**6g**).

This compound was isolated as pale-yellow oil by following the general procedure-2. 140 mg

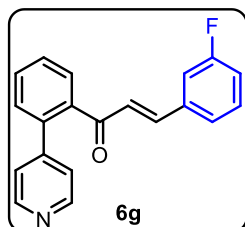

of **AF** afforded 172 mg of **6g** (80% yield),  $R_f = 0.4$  (4:6 EtOAc: Hexanes, visualized by 254 nm UV light). **IR (thin film, neat):**  $\nu_{\max}/\text{cm}^{-1}$  2924, 2853, 1667, 1639, 1593, 1406, 1321, 1209, 1008, 981, 824, 762.  **$^1\text{H}$  NMR (400 MHz,  $\text{CDCl}_3$ ):**  $\delta$  8.59 (m, 2H), 7.66 (d,  $J = 7.5, 1\text{H}$ ), 7.62 (t,  $J = 7.5$  Hz, 1H), 7.54 (t,  $J = 7.4$  Hz, 1H), 7.46 (d,  $J = 7.5$  Hz, 1H), 7.33-7.28 (m, 4H), 7.09 (d,  $J = 7.6$  Hz, 1H), 7.06-6.99 (m, 2H), 6.67 (d,  $J = 16$  Hz, 1H).  **$^{13}\text{C}$  NMR (100 MHz,  $\text{CDCl}_3$ ):**  $\delta$  195.34, 162.92 (d,  $J_{\text{C-F}} = 245.6$  Hz), 149.97 (2C), 148.26, 143.74 (d,  $J_{\text{C-F}} = 2.8$  Hz), 139.32, 138.25, 136.47 (d,  $J_{\text{C-F}} = 7.6$  Hz), 131.16, 130.50 (d,  $J_{\text{C-F}} = 8.1$  Hz), 130.06, 128.99, 128.74, 127.53, 124.26 (d,  $J_{\text{C-F}} = 2.8$  Hz), 123.79 (2C), 117.68 (d,  $J_{\text{C-F}} = 21.3$  Hz), 114.47 (d,  $J_{\text{C-F}} = 21.9$  Hz).  **$^{19}\text{F}$  NMR (376 MHz,  $\text{CDCl}_3$ ):**  $\delta$  -112.26. **HRMS (ESI):**  $m/z$  calcd for  $\text{C}_{20}\text{H}_{15}\text{FNO}$  ( $\text{M}+\text{H}^+$ ) 304.1138 found 304.1187.

### (*E*)-3-(2-Bromophenyl)-1-(2-(pyridin-4-yl)phenyl)prop-2-en-1-one (**6h**).

This compound was isolated as pale-yellow oil by following the general procedure-2. 125 mg

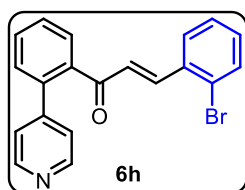

of **AF** afforded 195 mg of **6h** (85% yield),  $R_f = 0.4$  (3:7 EtOAc: Hexanes, visualized by 254 nm UV light). **IR (thin film, neat):**  $\nu_{\max}/\text{cm}^{-1}$  1666, 1644, 1597, 1465, 1440, 1408, 1207, 1025, 828, 760.  **$^1\text{H}$  NMR (500 MHz,  $\text{CDCl}_3$ ):**  $\delta$  8.64-8.58 (m, 2H), 7.71-7.64 (m, 2H), 7.61 (td,  $J = 7.6, 1.5$  Hz, 1H), 7.54 (tt,  $J = 7.8, 1.2$  Hz, 2H), 7.47 (dd,  $J = 7.6, 1.3$  Hz, 1H), 7.33-7.29 (m, 2H), 7.25-7.21 (m, 2H), 7.19-7.14 (m, 1H), 6.59 (d,  $J = 16.0$  Hz, 1H).  **$^{13}\text{C}$  NMR (125 MHz,  $\text{CDCl}_3$ ):**  $\delta$  195.78, 149.92 (2C), 148.27, 143.82, 139.22, 138.17, 134.27, 133.43, 131.58, 131.09, 129.95, 129.15, 129.07, 128.73, 127.77, 127.71, 125.69, 123.96 (2C). **HRMS (ESI):**  $m/z$  calcd for  $\text{C}_{20}\text{H}_{15}\text{BrNO}$  ( $\text{M}+\text{H}^+$ ) 364.0337, found: 364.0351.

### (*E*)-1-(2-(Pyridin-4-yl)phenyl)-3-(thiophen-2-yl)prop-2-en-1-one (**6i**).

This compound was isolated as reddish-brown oil by following the general procedure-2. 150 mg of **AF** afforded 195 mg of **6i** (88% yield),  $R_f = 0.4$  (3:7 EtOAc: Hexanes, visualized by



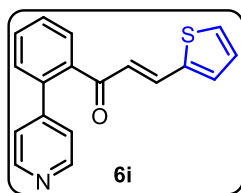

254 nm UV light). **IR (thin film, neat):**  $\nu_{\max}/\text{cm}^{-1}$  3105, 3063, 3026, 1658, 1636, 1583, 1474, 1409, 1363, 1282, 1209, 1078, 1023, 827, 761.  **$^1\text{H}$  NMR (500 MHz,  $\text{CDCl}_3$ ):**  $\delta$  8.63-8.56 (m, 2H), 7.68-7.63 (m, 1H), 7.59 (td,  $J = 7.6, 1.5$  Hz, 1H), 7.53 (dd,  $J = 7.5, 1.3$  Hz, 1H), 7.52-7.48 (m, 1H), 7.45-7.42 (m, 1H), 7.35 (dt,  $J = 5.0, 1.0$  Hz, 1H), 7.30-7.27 (m, 2H), 7.18-7.15 (m, 1H), 7.00 (dd,  $J = 5.1, 3.6$  Hz, 1H), 6.51 (d,  $J = 15.7$  Hz, 1H).  **$^{13}\text{C}$  NMR (125 MHz,  $\text{CDCl}_3$ ):**  $\delta$  194.82, 149.78 (2C), 148.43, 139.66, 139.48, 138.22, 137.55, 132.04, 130.95, 130.06, 129.57, 128.90, 128.66, 128.37, 125.28, 123.83 (2C). **HRMS (ESI):**  $m/z$  calcd for  $\text{C}_{18}\text{H}_{14}\text{NOS}$  ( $\text{M}+\text{H}$ )<sup>+</sup> 292.0796, found: 292.0789.

**(E)-1-(2-(Pyridin-4-yl)phenyl)hex-2-en-1-one (6j).**

This compound was isolated as pale-yellow oil by following the general procedure-4. 150 mg

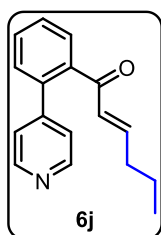

of **AL** afforded 155 mg of **6j** (81% yield),  $R_f = 0.4$  (3:7 EtOAc: Hexanes, visualized by 254 nm UV light). **IR (thin film, neat):**  $\nu_{\max}/\text{cm}^{-1}$  3064, 2959, 2871, 1650, 1617, 1594, 1209, 1118, 970, 804, 762.  **$^1\text{H}$  NMR (400 MHz,  $\text{CDCl}_3$ ):**  $\delta$  8.61-8.57 (m, 2H), 7.56-7.49 (m, 3H), 7.41 (dd,  $J = 7.6, 1.3$  Hz, 1H), 7.25-7.22 (m, 2H), 6.54 (dt,  $J = 15.8, 6.9$  Hz, 1H), 6.07 (dt,  $J = 15.7, 1.5$  Hz, 1H), 2.02 (qd,  $J = 7.2, 1.5$  Hz, 2H), 1.31-1.23 (m, 2H), 0.78 (t,  $J = 7.4$  Hz, 3H).  **$^{13}\text{C}$  NMR (100 MHz,  $\text{CDCl}_3$ ):**  $\delta$  196.70, 151.59, 149.83, 148.34 (2C), 139.51, 137.81, 130.85, 130.60, 129.74, 128.76, 128.55, 123.80, 123.75, 34.51, 21.08, 13.59. **HRMS (ESI):**  $m/z$  calcd for  $\text{C}_{17}\text{H}_{18}\text{NO}$  ( $\text{M}+\text{H}$ )<sup>+</sup> 252.1388 found: 252.1385.

**(E)-3-Phenyl-1-(1-(pyridin-4-yl)naphthalen-2-yl)prop-2-en-1-one (6k).**

This compound was isolated as pale-yellow oil by following the general procedure-2. 120 mg

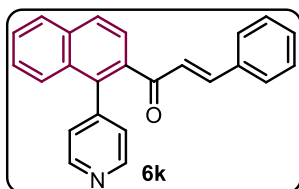

of **AF** afforded 163 mg of **6k** (80% yield),  $R_f = 0.4$  (3:7 EtOAc: Hexanes, visualized by 254 nm UV light). **IR (thin film, neat):**  $\nu_{\max}/\text{cm}^{-1}$  1658, 1642, 1598, 1340, 1207, 1051, 978, 824, 766, 750.  **$^1\text{H}$  NMR (400 MHz,  $\text{CDCl}_3$ ):**  $\delta$  8.71-8.68 (m, 2H), 8.04 (d,  $J = 8.5$  Hz, 1H), 8.00 (dd,  $J = 8.1, 1.4$  Hz, 1H), 7.71 (d,  $J = 8.5$  Hz, 1H), 7.67-7.61 (m, 2H), 7.56-7.52 (m, 1H), 7.38-7.34 (m, 7H), 7.30 (d,  $J = 9.9$  Hz, 1H), 6.75 (d,  $J = 16.1$  Hz, 1H).  **$^{13}\text{C}$  NMR (100 MHz,  $\text{CDCl}_3$ ):**  $\delta$  196.28, 149.57 (2C), 146.04, 137.05, 135.47, 134.23, 134.21, 131.13, 130.85, 128.97 (2C), 128.89, 128.62, 128.38 (2C), 128.36 (2C), 127.46, 127.41, 126.80, 126.39, 125.77, 124.58. **HRMS (ESI):**  $m/z$  calcd for  $\text{C}_{24}\text{H}_{18}\text{NO}$  ( $\text{M}+\text{H}$ )<sup>+</sup> 336.1388 found 336.1375.

**(E)-1-(3-Methyl-2-(pyridin-4-yl)phenyl)-3-phenylprop-2-en-1-one (6l).**

This compound was isolated as pale-yellow oil by following the general procedure-2. 100 mg

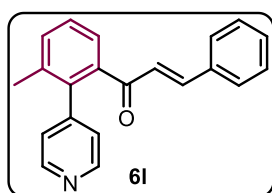

of **AF** afforded 138 mg of **6l** (91% yield),  $R_f = 0.4$  (3:7 EtOAc: Hexanes, visualized by 254 nm UV light). **IR (thin film, neat):**  $\nu_{\max}/\text{cm}^{-1}$  3062, 2931, 1668, 1643, 1599, 1574, 1450, 1331, 1286, 1232, 1134, 1083, 1054, 981, 764.  **$^1\text{H}$  NMR (500 MHz,  $\text{CDCl}_3$ ):**  $\delta$  8.61-8.57 (m, 2H), 7.47-7.40 (m, 3H), 7.38-7.33 (m, 5H), 7.29 (d,  $J = 16.1$  Hz, 1H), 7.18-7.14 (m, 2H), 6.70 (d,  $J = 16.0$  Hz, 1H), 2.18 (s, 3H).  **$^{13}\text{C}$  NMR (125**



**MHz, CDCl<sub>3</sub>):**  $\delta$  195.93, 149.60 (2C), 147.77, 145.74, 140.02, 137.17, 136.30, 134.32, 132.48, 130.74, 128.94 (2C), 128.33 (2C), 128.08, 126.77, 125.79, 124.73(2C), 20.44. **HRMS (ESI):** m/z calcd for C<sub>21</sub>H<sub>18</sub>NO (M+H)<sup>+</sup> 300.1388 found: 300.1403.

**(E)-1-(4,5-Dimethoxy-2-(pyridin-4-yl)phenyl)-3-phenylprop-2-en-1-one (6m).**

This compound was isolated as an off-white solid by following the general procedure-2. 150 mg of **AF** afforded 231 mg of **6m** (88% yield), M.P = 155-158 °C, R<sub>f</sub> = 0.3 (4:6 EtOAc: Hexanes, visualized by 254 nm UV light). **IR (thin film, neat):**  $\nu_{\max}/\text{cm}^{-1}$  2935, 2849, 1660, 1637, 1596, 1351, 1244, 1156, 1029, 989, 831. **<sup>1</sup>H NMR (400 MHz, CDCl<sub>3</sub>):**  $\delta$  8.64-8.56 (m, 2H), 7.41 (d, *J* = 15.9 Hz, 1H), 7.38-7.27 (m, 6H), 7.26-7.21 (m, 2H), 6.91 (s, 1H), 6.56 (d, *J* = 15.9 Hz, 1H), 4.00 (s, 3H), 3.99 (s, 3H). **<sup>13</sup>C NMR (100 MHz, CDCl<sub>3</sub>):**  $\delta$  194.15, 151.10, 149.92 (2C), 149.12, 148.53, 144.09, 134.40, 132.19, 132.13, 130.59, 128.90 (2C), 128.20 (2C), 126.45, 124.02 (2C), 112.41, 112.19, 56.25 (2C). **HRMS (ESI):** m/z calcd for C<sub>22</sub>H<sub>20</sub>NO<sub>3</sub> (M+H)<sup>+</sup> 346.1443 found: 346.1426.

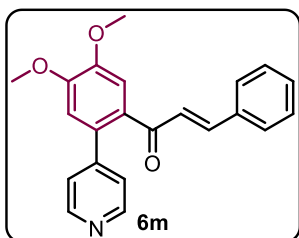

**(E)-1-(4,5-Dimethoxy-2-(pyridin-4-yl)phenyl)-3-(naphthalen-1-yl)prop-2-en-1-one (6n).**

This compound was isolated as a reddish-orange solid by following the general procedure-2. 150 mg of **AF** afforded 246 mg of **6n** (82% yield), M.P = 95-96 °C. R<sub>f</sub> = 0.3 (4:6 EtOAc: Hexanes, visualized by 254 nm UV light). **IR (thin film, neat):**  $\nu_{\max}/\text{cm}^{-1}$  3058, 3009, 2930, 1709, 1659, 1595, 1542, 1516, 1462, 1439, 1413, 1395, 1350, 1322, 1272, 1243, 1218, 1203, 1154, 1026, 788. **<sup>1</sup>H NMR (400 MHz, CDCl<sub>3</sub>):** 8.68 – 8.61 (m, 2H), 8.27 (d, *J* = 15.6 Hz, 1H), 7.99 – 7.93 (m, 1H), 7.87 – 7.81 (m, 2H), 7.52 (ddd, *J* = 7.2, 4.9, 1.6 Hz, 2H), 7.41 – 7.34 (m, 4H), 7.16 (dd, *J* = 7.2, 1.1 Hz, 1H), 6.93 (s, 1H), 6.62 (d, *J* = 15.6 Hz, 1H), 4.02 (s, 3H), 4.01 (s, 3H). **<sup>13</sup>C NMR (100 MHz, CDCl<sub>3</sub>):**  $\delta$  193.91, 151.21, 150.01 (2C), 149.21, 148.57, 140.65, 133.60, 132.35, 132.18, 131.84, 131.45, 130.78, 129.04, 128.77, 126.93, 126.25, 125.44, 125.18, 124.20 (2C), 123.20, 112.40, 112.31, 56.27, 56.23. **HRMS (ESI):** m/z calcd for C<sub>26</sub>H<sub>22</sub>NO<sub>3</sub> (M+H)<sup>+</sup> 396.1600 found 396.1605.

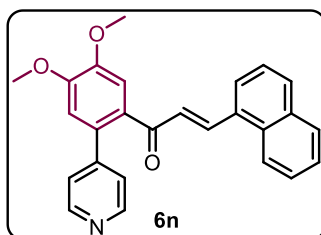

**(E)-3-Phenyl-1-(2-(pyridin-4-yl)-5-(trifluoromethyl)phenyl)prop-2-en-1-one (6o).**

This compound was isolated as pale-yellow liquid by following the general procedure-2. 120 mg of **AF** afforded 174 mg of **6o** (81% yield), R<sub>f</sub> = 0.3 (4:6 EtOAc: Hexanes, visualized by 254 nm UV light). **IR (thin film, neat):**  $\nu_{\max}/\text{cm}^{-1}$  3061, 2957, 2873, 1650, 1614, 1595, 1108, 973, 801, 757. **<sup>1</sup>H NMR (400 MHz, CDCl<sub>3</sub>):**  $\delta$  8.70-8.62 (m, 2H), 7.93 (d, *J* = 1.8 Hz, 1H), 7.88 (dd, *J* = 8.0, 1.9 Hz, 1H), 7.62 (d, *J* = 8.0 Hz, 1H), 7.43-7.29 (m, 8H), 6.71 (d, *J* = 16.1 Hz, 1H). **<sup>13</sup>C NMR (100 MHz, CDCl<sub>3</sub>):**  $\delta$  194.19, 150.18 (2C), 146.91, 146.55, 141.47, 140.15, 133.87, 131.21, 130.88, 130.62, 129.04 (2C), 128.48 (2C), 127.50 (apparent q, *J*<sub>C-F</sub> = 3.6 Hz), 125.86 (apparent q, *J*<sub>C-F</sub> = 3.7 Hz),

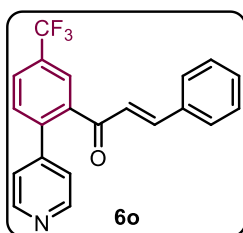

125.77, 123.54 (2C), 123.50 (q,  $J_{C-F} = 270.9$  Hz).  $^{19}\text{F}$  NMR (376 MHz,  $\text{CDCl}_3$ ):  $\delta$  -62.69. HRMS (ESI):  $m/z$  calcd for  $\text{C}_{21}\text{H}_{15}\text{F}_3\text{NO}$  ( $\text{M}+\text{H}$ ) $^+$  354.1106 found: 354.1120.

**(E)-3-Phenyl-1-(3-(pyridin-4-yl)benzo[b]thiophen-2-yl)prop-2-en-1-one (6p).**

This compound was isolated as reddish-brown solid by following the general procedure-3.

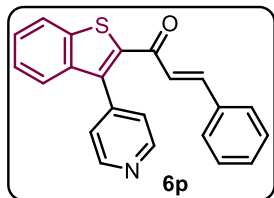

100 mg of **AI** afforded 138 mg of **6p** (80% yield), M.P. = 149.6-151.2 °C.  $R_f = 0.4$  (4:6 EtOAc: Hexanes, visualized by 254 nm UV light). IR (thin film, neat):  $\nu_{\text{max}}/\text{cm}^{-1}$  1640, 1594, 1573, 1522, 1483, 1357, 1210, 1179, 991, 974, 762.  $^1\text{H}$  NMR (500 MHz,  $\text{CDCl}_3$ ):  $\delta$  8.84-8.78 (m, 2H), 7.97-7.91 (m, 1H), 7.68 (d,  $J = 15.6$  Hz, 1H), 7.52 (td,  $J = 8.0, 1.0$  Hz, 2H), 7.46-7.39 (m, 3H), 7.38-7.30 (m, 3H), 7.23-7.15 (m, 2H), 6.72 (d,  $J = 15.5$  Hz, 1H).  $^{13}\text{C}$  NMR (125 MHz,  $\text{CDCl}_3$ ):  $\delta$  184.52, 150.26 (2C), 144.24, 143.68, 141.59, 140.83, 139.52, 137.93, 134.32, 130.85, 129.01 (2C), 128.39 (2C), 127.69, 125.42, 125.08 (2C), 124.82, 123.50, 122.89. HRMS (ESI):  $m/z$  calcd for  $\text{C}_{22}\text{H}_{16}\text{NOS}$  ( $\text{M}+\text{H}$ ) $^+$  342.0953, found: 342.0941.

**(E)-3-Phenyl-1-(4-(pyridin-4-yl)-2H-chromen-3-yl)prop-2-en-1-one (6q).**

This compound was isolated as pale-yellow solid by following the general procedure-3.

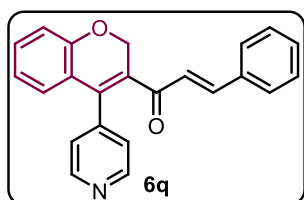

150 mg of **AI** afforded 125 mg of **6q** (83% yield), M.P. = 87-90 °C.  $R_f = 0.4$  (3:7 EtOAc: Hexanes, visualized by 254 nm UV light). IR (thin film, neat):  $\nu_{\text{max}}/\text{cm}^{-1}$  3036, 1645, 1591, 1574, 1481, 1449, 1373, 1277, 1239, 1204, 1115, 988, 823, 762.  $^1\text{H}$  NMR (500 MHz,  $\text{CDCl}_3$ ):  $\delta$  8.74-8.65 (m, 2H), 7.45 (d,  $J = 15.7$  Hz, 1H), 7.32-7.25 (m, 6H), 7.08 (dt,  $J = 6.8, 1.6$  Hz, 2H), 6.99 (dd,  $J = 8.1, 1.2$  Hz, 1H), 6.90 (td,  $J = 7.6, 1.2$  Hz, 1H), 6.75 (dd,  $J = 7.8, 1.6$  Hz, 1H), 6.20 (d,  $J = 15.8$  Hz, 1H), 5.07 (s, 2H).  $^{13}\text{C}$  NMR (125 MHz,  $\text{CDCl}_3$ ):  $\delta$  190.76, 155.55, 150.08 (2C), 144.93, 143.34, 138.95, 134.29, 131.99, 130.65, 129.75, 128.93 (2C), 128.18 (2C), 127.77, 124.90, 124.86 (2C), 122.93, 121.95, 116.76, 66.40. HRMS (ESI):  $m/z$  calcd for  $\text{C}_{23}\text{H}_{18}\text{NO}_2$  ( $\text{M}+\text{H}$ ) $^+$  340.1338 found 340.1333.

**(E)-1-(2-(3-Methylpyridin-4-yl)phenyl)-3-phenylprop-2-en-1-one (6r).**

This compound was isolated as pale-yellow oil by following the general procedure-2.

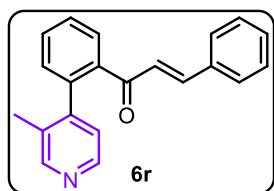

150 mg of **AF** afforded 187 mg of **6r** (82% yield),  $R_f = 0.4$  (3:7 EtOAc: Hexanes, visualized by 254 nm UV light). IR (thin film, neat):  $\nu_{\text{max}}/\text{cm}^{-1}$  3062, 2931, 1666, 1638, 1599, 1574, 1454, 1331, 1288, 1232, 1134, 1092, 1054, 983, 764.  $^1\text{H}$  NMR (500 MHz,  $\text{CDCl}_3$ ):  $\delta$  8.45 (d,  $J = 1.8$  Hz, 1H), 8.42 (dd,  $J = 5.0, 1.8$  Hz, 1H), 7.77-7.74 (m, 1H), 7.60-7.56 (m, 1H), 7.53 (tt,  $J = 7.5, 1.7$  Hz, 1H), 7.42 (dd,  $J = 16.0, 1.9$  Hz, 1H), 7.36-7.32 (m, 5H), 7.26 (dd,  $J = 7.8, 1.6$  Hz, 1H), 7.09 (dd,  $J = 5.0, 1.8$  Hz, 1H), 6.79 (dd,  $J = 15.9, 2.0$  Hz, 1H), 2.14 (s, 3H).  $^{13}\text{C}$  NMR (125 MHz,  $\text{CDCl}_3$ ):  $\delta$  194.10, 150.84, 148.63, 146.96, 145.11, 139.12, 138.03, 134.33, 131.22, 130.96, 130.74, 130.03, 128.96 (2C), 128.77, 128.33 (2C), 128.22, 125.49, 123.99, 17.02. HRMS (ESI):  $m/z$  calcd for  $\text{C}_{21}\text{H}_{18}\text{NO}$  ( $\text{M}+\text{H}$ ) $^+$

300.1388 found 300.1399. **(E)-1-(2-(3-Methylpyridin-4-yl)phenyl)-3-(naphthalen-1-yl)prop-2-en-1-one (6s)**.

This compound was isolated as yellowish-brown oil by following the general procedure-2.

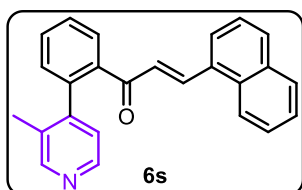

120 mg of **AF** afforded 189 mg of **6s** (89% yield),  $R_f = 0.4$  (3:7 EtOAc: Hexanes, visualized by 254 nm UV light). **IR (thin film, neat):**  $\nu_{\max}/\text{cm}^{-1}$  2921, 2851, 1666, 1642, 1595, 1408, 1326, 1208, 1024, 983, 826, 760.  **$^1\text{H NMR}$  (500 MHz,  $\text{CDCl}_3$ ):**  $\delta$  8.48 (s, 1H), 8.46 (d,  $J = 5.0$  Hz, 1H), 8.30 (d,  $J = 15.6$  Hz, 1H), 8.01-7.97 (m, 1H), 7.87-7.81 (m, 3H), 7.60 (td,  $J = 7.5, 1.5$  Hz, 1H), 7.57-7.53 (m, 1H), 7.50 (td,  $J = 7.6, 1.5$  Hz, 2H), 7.43-7.36 (m, 2H), 7.28 (dd,  $J = 7.5, 1.4$  Hz, 1H), 7.13 (d,  $J = 4.9$  Hz, 1H), 6.85 (d,  $J = 15.6$  Hz, 1H), 2.15 (s, 3H).  **$^{13}\text{C NMR}$  (125 MHz,  $\text{CDCl}_3$ ):**  $\delta$  193.73, 151.05, 148.66, 147.18, 141.65, 139.25, 138.15, 133.68, 131.72, 131.54, 131.29, 131.15, 130.99, 130.13, 128.95, 128.82, 128.33, 127.79, 127.02, 126.30, 125.44, 125.24, 124.08, 123.17, 17.06. **HRMS (ESI):**  $m/z$  calcd for  $\text{C}_{25}\text{H}_{20}\text{NO}$  ( $\text{M}+\text{H}$ ) $^+$  350.1545 found 350.1529.

**(E)-1-(2-(2-Methylpyridin-4-yl)phenyl)-3-phenylprop-2-en-1-one (6t)**.

This compound was isolated as pale-yellow oil by following the general procedure-2. 120

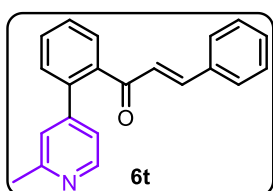

mg of **AF** afforded 136 mg of **6t** (80% yield),  $R_f = 0.4$  (3:7 EtOAc: Hexanes, visualized by 254 nm UV light). **IR (thin film, neat):**  $\nu_{\max}/\text{cm}^{-1}$  1669, 1643, 1603, 1573, 1545, 1494, 1448, 1331, 1261, 1209, 763, 752.  **$^1\text{H NMR}$  (400 MHz,  $\text{CDCl}_3$ ):**  $\delta$  8.47 (d,  $J = 5.1$  Hz, 1H), 7.66 (dd,  $J = 7.5, 1.5$  Hz, 1H), 7.60 (td,  $J = 7.6, 1.5$  Hz, 1H), 7.53 (td,  $J = 7.5, 1.4$  Hz, 1H), 7.45 (dd,  $J = 7.6, 1.4$  Hz, 1H), 7.39-7.32 (m, 6H), 7.17 (d,  $J = 1.7$  Hz, 1H), 7.11 (dd,  $J = 5.1, 1.7$  Hz, 1H), 6.71 (d,  $J = 16.0$  Hz, 1H), 2.54 (s, 3H).  **$^{13}\text{C NMR}$  (100 MHz,  $\text{CDCl}_3$ ):**  $\delta$  195.89, 158.64, 149.20, 148.69, 145.43, 139.49, 138.49, 134.29, 130.89, 130.77, 129.96, 128.94 (2C), 128.90, 128.51, 128.31 (2C), 126.63, 123.39, 120.96, 24.45. **HRMS (ESI):**  $m/z$  calcd for  $\text{C}_{21}\text{H}_{18}\text{NO}$  ( $\text{M}+\text{H}$ ) $^+$  300.1388 found 300.1376.

**3-Methyl-1-(2-(pyridin-4-yl)phenyl)but-2-en-1-one (6z)**.

This compound was isolated as yellowish-red oil by following the general procedure-4. 160

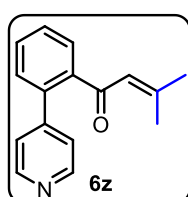

mg of **AL** afforded 150 mg of **6z** (78% yield),  $R_f = 0.4$  (3:7 EtOAc: Hexanes, visualized by 254 nm UV light). **IR (thin film, neat):**  $\nu_{\max}/\text{cm}^{-1}$  2925, 1665, 1608, 1583, 1437, 1409, 1225, 1101, 831, 750.  **$^1\text{H NMR}$  (400 MHz,  $\text{CDCl}_3$ ):**  $\delta$  8.63 (d,  $J = 5.1$  Hz, 2H), 7.63 (dd,  $J = 7.4, 1.6$  Hz, 1H), 7.58-7.48 (m, 2H), 7.39 (dd,  $J = 7.3, 1.5$  Hz, 1H), 7.28 (d,  $J = 4.2$  Hz, 2H), 6.03 (s 1H), 2.09 (s 3H), 1.74 (s 3H).  **$^{13}\text{C NMR}$  (100 MHz,  $\text{CDCl}_3$ ):**  $\delta$  195.17, 156.97, 149.51 (2C), 148.86, 141.54, 137.76, 130.58, 129.90, 128.65, 128.50 (2C), 124.95, 123.94, 27.67, 20.92. **HRMS (ESI):**  $m/z$  calcd for  $\text{C}_{16}\text{H}_{16}\text{NO}$  ( $\text{M}+\text{H}$ ) $^+$  238.1232 found: 238.1231.

**(E)-3-Phenyl-1-(2-(quinolin-4-yl)phenyl)prop-2-en-1-one (7a)**.

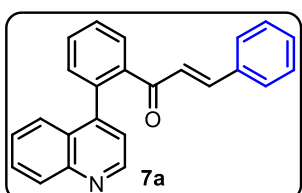

This compound was isolated as yellowish-brown semi-solid by following the general procedure-2. 200 mg of **AF** afforded 250 mg

of **7a** (92% yield),  $R_f = 0.4$  (3:7 EtOAc: Hexanes, visualized by 254 nm UV light). **IR (thin film, neat):**  $\nu_{\max}/\text{cm}^{-1}$  1667, 1642, 1604, 1331, 1277, 1209, 1017, 981, 959, 764, 750.  **$^1\text{H}$  NMR (400 MHz,  $\text{CDCl}_3$ ):**  $\delta$  8.87 (d,  $J = 4.3$  Hz, 1H), 8.13 (dd,  $J = 8.6, 1.3$  Hz, 1H), 7.85-7.81 (m, 1H), 7.76 (dd,  $J = 8.4, 1.4$  Hz, 1H), 7.69 (ddd,  $J = 8.4, 6.8, 1.5$  Hz, 1H), 7.62 (td,  $J = 6.8, 1.7$  Hz, 2H), 7.50 (ddd,  $J = 8.3, 6.9, 1.3$  Hz, 1H), 7.47-7.44 (m, 1H), 7.30-7.24 (m, 3H), 7.23-7.17 (m, 2H), 7.05-7.00 (m, 2H), 6.59 (d,  $J = 16.0$  Hz, 1H).  **$^{13}\text{C}$  NMR (100 MHz,  $\text{CDCl}_3$ ):**  $\delta$  194.40, 149.70, 148.34, 147.32, 144.76, 140.32, 136.61, 134.09, 130.98, 130.78, 130.54, 129.91, 129.52, 129.01, 128.76 (2C), 128.73, 128.14 (2C), 127.07, 127.04, 125.68, 125.51, 122.01. **HRMS (ESI):**  $m/z$  calcd for  $\text{C}_{24}\text{H}_{18}\text{NO}$  ( $\text{M}+\text{H}$ ) $^+$  336.1388 found 336.1376.

**(E)-3-(3,5-Dimethoxyphenyl)-1-(2-(quinolin-4-yl)phenyl)prop-2-en-1-one (7b).**

This compound was isolated as pale-yellow solid by following the general procedure-2. 150 mg of **AF** afforded 210 mg of **7b** (88% yield), M.P = 113.4-116 °C.  $R_f = 0.4$  (3:7 EtOAc: Hexanes, visualized by 254 nm UV light). **IR (thin film, neat):**  $\nu_{\max}/\text{cm}^{-1}$  3060, 2933, 2838,

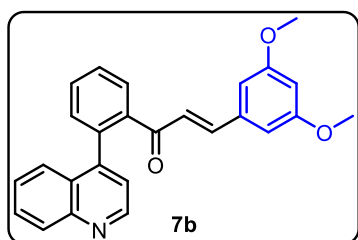

1667, 1642, 1586, 1507, 1457, 1425, 1284, 1203, 1154, 1061, 1020, 979, 925, 843, 767, 734.  **$^1\text{H}$  NMR (400 MHz,  $\text{CDCl}_3$ ):**  $\delta$  8.88 (d,  $J = 4.4$  Hz, 1H), 8.17-8.09 (m, 1H), 7.86-7.80 (m, 1H), 7.79 (dd,  $J = 8.4, 1.4$  Hz, 1H), 7.70 (ddd,  $J = 8.4, 6.9, 1.5$  Hz, 1H), 7.66-7.60 (m, 2H), 7.55-7.43 (m, 2H), 7.28 (d,  $J = 4.9$  Hz, 1H), 7.21 (d,  $J = 15.8$  Hz, 1H), 6.50 (d,  $J = 15.8$  Hz, 1H), 6.38 (t,  $J = 2.2$  Hz, 1H), 6.17 (d,  $J = 2.2$  Hz, 2H), 3.65 (d,  $J = 1.2$  Hz, 6H).  **$^{13}\text{C}$  NMR (100 MHz,  $\text{CDCl}_3$ ):**  $\delta$  194.23, 160.78 (2C), 149.74, 148.40, 147.18, 144.60, 140.29, 136.52, 135.97, 131.05, 130.81, 129.98, 129.53, 129.17, 128.76, 127.03, 126.97, 125.82, 125.70, 122.16, 105.80 (2C), 103.15, 77.45, 77.13, 76.81, 55.34, 55.31. **HRMS (ESI):**  $m/z$  calcd for  $\text{C}_{26}\text{H}_{22}\text{NO}_3$  ( $\text{M}+\text{H}$ ) $^+$  396.1600 found 396.1597.

**(E)-1-(2-(Quinolin-4-yl)phenyl)-3-(thiophen-2-yl)prop-2-en-1-one (7c).**

This compound was isolated as reddish-brown oil by following the general procedure-2. 180

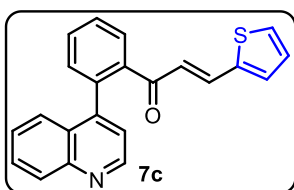

mg of **AF** afforded 194 mg of **7c** (78% yield),  $R_f = 0.4$  (3:7 EtOAc: Hexanes, visualized by 254 nm UV light). **IR (thin film, neat):**  $\nu_{\max}/\text{cm}^{-1}$  2954, 2924, 2853, 1660, 1639, 1582, 1508, 1420, 1387, 1364, 1280, 1209, 1018, 969, 853, 766, 709.  **$^1\text{H}$  NMR (400 MHz,  $\text{CDCl}_3$ ):**  $\delta$  8.89 (d,  $J = 4.4$  Hz, 1H), 8.17-8.09 (m, 1H), 7.86-7.80 (m, 1H), 7.75-7.67 (m, 2H), 7.62 (td,  $J = 6.4, 1.3$  Hz, 2H), 7.50 (ddd,  $J = 8.5, 7.0, 1.4$  Hz, 1H), 7.47-7.43 (m, 1H), 7.39 (d,  $J = 15.6$  Hz, 1H), 7.30-7.26 (m, 1H), 7.24 (d,  $J = 5.1$  Hz, 1H), 6.96 (d,  $J = 3.6$  Hz, 1H), 6.90 (ddd,  $J = 4.9, 3.6, 1.1$  Hz, 1H), 6.40 (d,  $J = 15.5$  Hz, 1H).  **$^{13}\text{C}$  NMR (100 MHz,  $\text{CDCl}_3$ ):**  $\delta$  193.5, 149.7 (2C), 148.3, 147.2, 140.2, 139.5, 136.8, 136.6, 131.8, 131.0, 130.8, 129.9, 129.5, 129.2, 128.9, 128.7, 128.1, 127.0, 125.6, 124.1, 121.9. **HRMS (ESI):**  $m/z$  calcd for  $\text{C}_{22}\text{H}_{16}\text{NOS}$  ( $\text{M}+\text{H}$ ) $^+$  342.0953 found 342.0949.

**(E)-1-(4,5-Dimethoxy-2-(quinolin-4-yl)phenyl)-3-phenylprop-2-en-1-one (7d).**

This compound was isolated as pale-yellow solid by following the general procedure-2. 150 mg of **AF** afforded 170 mg of **7d** (88% yield), M.P = 158-161 °C.  $R_f = 0.3$  (4:6 EtOAc:

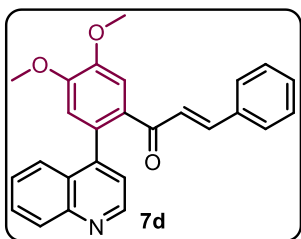

Hexanes, visualized by 254 nm UV light). **IR (thin film, neat):**  $\nu_{\max}/\text{cm}^{-1}$  3073, 2959, 2929, 2851, 1705, 1658, 1594, 1573, 1514, 1464, 1440, 1346, 1263, 1248, 1199, 1145, 1027, 991, 805.  **$^1\text{H}$  NMR (400 MHz,  $\text{CDCl}_3$ ):**  $\delta$  8.91 (d,  $J = 4.4$  Hz, 1H), 8.16 (dd,  $J = 8.6, 1.3$  Hz, 1H), 7.82 (dd,  $J = 8.5, 1.4$  Hz, 1H), 7.74 (ddd,  $J = 8.3, 6.8, 1.4$  Hz, 1H), 7.56 (ddd,  $J = 8.3, 6.8, 1.4$  Hz, 1H), 7.45 (s, 1H), 7.32 (d,  $J = 4.4$  Hz, 1H), 7.27 – 7.20 (m, 2H), 7.20 – 7.13 (m, 2H), 6.92 (s, 1H), 6.86 (dd,  $J = 7.1, 1.8$  Hz, 2H), 6.44 (d,  $J = 15.8$  Hz, 1H), 4.05 (s, 3H), 3.95 (s, 3H).  **$^{13}\text{C}$  NMR (100 MHz,  $\text{CDCl}_3$ ):**  $\delta$  192.75, 151.09, 149.65, 149.06, 148.23, 147.79, 143.38, 134.23, 132.93, 130.53, 130.29, 129.77, 129.68, 128.68, 127.95, 127.34, 127.30, 125.70, 125.35, 122.32, 113.26, 112.08, 56.28. **HRMS (ESI):**  $m/z$  calcd for  $\text{C}_{26}\text{H}_{21}\text{NO}_3$  ( $\text{M}+\text{H}$ )<sup>+</sup> 396.1600 found 396.1590.

**(E)-1-(4,5-dimethoxy-2-(quinolin-4-yl)phenyl)-3-(naphthalen-1-yl)prop-2-en-1-one (7e).**

This compound was isolated as a yellowish-brown solid by following the general procedure-

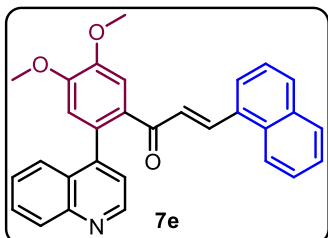

2. 125 mg of **AF** afforded 136 mg of **7e** (75% yield), M.P = 157-159.4 °C.  $R_f = 0.3$  (4:6 EtOAc: Hexanes, visualized by 254 nm UV light). **IR (thin film, neat):**  $\nu_{\max}/\text{cm}^{-1}$  2955, 2931, 2852, 1654, 1596, 1570, 1513, 1464, 1348, 1274, 1265, 1248, 1213, 1147, 1088, 1028, 976, 804, 777, 749.  **$^1\text{H}$  NMR (400 MHz,  $\text{CDCl}_3$ ):**  $\delta$  8.91 (dd,  $J = 4.4, 1.6$  Hz, 1H), 8.20-8.12 (m, 2H), 8.10 (d,  $J = 15.5$  Hz, 1H), 7.86-7.80 (m, 1H), 7.80-7.72 (m, 3H), 7.61-7.54 (m, 1H), 7.52 (s, 1H), 7.48-7.40 (m, 2H), 7.38 (dd,  $J = 8.5, 4.2$  Hz, 1H), 7.21 (t,  $J = 7.8$  Hz, 1H), 6.94 (s, 1H), 6.62 (d,  $J = 7.3$  Hz, 1H), 6.42 (d,  $J = 15.4$  Hz, 1H), 4.07 (s, 3H), 3.97 (s, 3H).  **$^{13}\text{C}$  NMR (100 MHz,  $\text{DMSO}-d_6$ ):**  $\delta$  192.49, 151.22, 149.86, 149.10, 148.49, 147.64, 140.07, 133.47, 133.08, 131.65, 131.32, 130.66, 130.53, 129.94, 129.68, 128.63, 127.79, 127.37, 127.33, 126.75, 126.11, 125.73, 125.25, 124.82, 123.15, 122.39, 113.36, 112.17, 56.32, 56.29. **HRMS (ESI):**  $m/z$  calcd for  $\text{C}_{30}\text{H}_{24}\text{NO}_3$  ( $\text{M}+\text{H}$ )<sup>+</sup> 446.1756 found 446.1757.

**(E)-3-(2-Bromophenyl)-1-(4,5-dimethoxy-2-(quinolin-4-yl)phenyl)prop-2-en-1-one (7f).**

This compound was isolated as yellowish-brown semi-solid by following the general

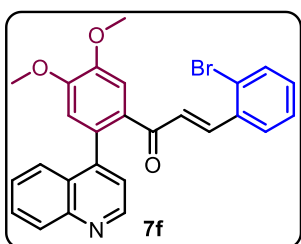

procedure-2. 120 mg of **AF** afforded 166 mg of **7f** (90% yield),  $R_f = 0.3$  (4:6 EtOAc: Hexanes, visualized by 254 nm UV light). **IR (thin film, neat):**  $\nu_{\max}/\text{cm}^{-1}$  2954, 2923, 2853, 1656, 1593, 1564, 1513, 1464, 1439, 1345, 1275, 1200, 1145, 1100, 1026, 805, 757, 733.  **$^1\text{H}$  NMR (400 MHz,  $\text{CDCl}_3$ ):**  $\delta$  8.90 (d,  $J = 4.3$  Hz, 1H), 8.14 (dt,  $J = 8.5, 0.9$  Hz, 1H), 7.79 (dd,  $J = 8.4, 1.4$  Hz, 1H), 7.71 (ddd,  $J = 8.4, 6.9, 1.4$  Hz, 1H), 7.60 (d,  $J = 15.8$  Hz, 1H), 7.53 (ddd,  $J = 8.3, 6.8, 1.3$  Hz, 1H), 7.46 (d,  $J = 1.7$  Hz, 1H), 7.44 (d,  $J = 1.4$  Hz, 1H), 7.32 (d,  $J = 4.4$  Hz, 1H), 7.08 (td,  $J = 7.6, 1.8$  Hz, 1H), 7.02 (td,  $J = 7.6, 1.5$  Hz, 1H), 6.92 (s, 1H), 6.43 (dd,  $J = 7.7, 1.8$  Hz, 1H), 6.31 (d,  $J = 15.8$  Hz, 1H), 4.05 (s, 3H), 3.95 (s, 3H).  **$^{13}\text{C}$  NMR (100 MHz,  $\text{CDCl}_3$ ):**  $\delta$  192.56, 151.22, 149.82, 149.03, 148.43, 147.47, 141.49, 134.31, 133.19, 132.65, 131.08, 130.71, 129.88, 129.65, 128.01, 127.46, 127.34, 127.29, 125.72, 125.39, 122.43,



113.27, 113.25, 112.20, 56.31, 56.27. **HRMS (ESI):**  $m/z$  calcd for  $C_{26}H_{21}BrNO_3$  ( $M+H$ )<sup>+</sup> 474.0705 found 474.0692.

**(E)-1-(4,5-Dimethoxy-2-(quinolin-4-yl)phenyl)-3-(3-fluorophenyl)prop-2-en-1-one (7g).**

This compound was isolated as yellowish-brown oil by following the general procedure-2.

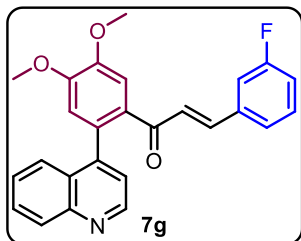

180 mg of **AF** afforded 190 mg of **7g** (78% yield).  $R_f$  = 0.3 (4:6 EtOAc: Hexanes, visualized by 254 nm UV light). **IR (thin film, neat):**  $\nu_{max}/cm^{-1}$  2990, 2933, 1661, 1592, 1515, 1447, 1348, 1275, 1248, 1147, 806, 750. **<sup>1</sup>H NMR (400 MHz, CDCl<sub>3</sub>):**  $\delta$  8.92 (dd,  $J$  = 4.2, 1.7 Hz, 1H), 8.13-8.05 (m, 2H), 7.75 (dd,  $J$  = 8.5, 7.1 Hz, 1H), 7.53 (dd,  $J$  = 7.1, 1.2 Hz, 1H), 7.45 (s, 1H), 7.40 (dd,  $J$  = 8.5, 4.2 Hz, 1H), 7.17-7.06 (m, 2H), 6.92 (d,  $J$  = 3.4 Hz, 2H), 6.61 (dt,  $J$  = 7.7, 1.3 Hz, 1H), 6.47 (d,  $J$  = 9.4 Hz, 1H), 6.28 (d,  $J$  = 15.8 Hz, 1H), 4.04 (s, 3H), 3.95 (s, 3H). **<sup>13</sup>C NMR (100 MHz, CDCl<sub>3</sub>):**  $\delta$  192.64, 162.66 (d,  $J_{C-F}$  = 245.3 Hz), 151.36, 150.55, 148.83, 148.20, 140.70 (d,  $J_{C-F}$  = 2.9 Hz), 139.00, 136.62 (d,  $J_{C-F}$  = 7.7 Hz), 134.08, 133.17, 132.06, 130.10 (d,  $J_{C-F}$  = 8.2 Hz), 129.77, 128.93, 128.23, 127.46, 126.48, 123.78 (d,  $J_{C-F}$  = 2.9 Hz), 121.67, 116.95 (d,  $J_{C-F}$  = 21.3 Hz), 114.0, 113.80, 111.94, 56.24 (2C). **<sup>19</sup>F NMR (376 MHz, CDCl<sub>3</sub>):**  $\delta$  -115.00. **HRMS (ESI):**  $m/z$  calcd for  $C_{26}H_{21}FNO_3$  ( $M+H$ )<sup>+</sup> 414.1505 found 414.1508.

**(E)-1-(4,5-Dimethoxy-2-(quinolin-4-yl)phenyl)-3-(4-methoxyphenyl)prop-2-en-1-one (7h).**

This compound was isolated as pale-yellow solid by following the general procedure-2. 200

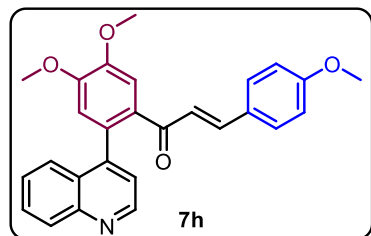

mg of **AF** afforded 221 mg of **7h** (80% yield), M.P = 153-156 °C.  $R_f$  = 0.4 (5:5 EtOAc: Hexanes, visualized by 254 nm UV light). **IR (thin film, neat):**  $\nu_{max}/cm^{-1}$  2921, 1651, 1595, 1570, 1510, 1463, 1250, 1100, 991, 828, 806. **<sup>1</sup>H NMR (400 MHz, CDCl<sub>3</sub>):**  $\delta$  8.90 (dd,  $J$  = 4.2, 1.7 Hz, 1H), 8.12-8.06 (m, 2H), 7.71 (dd,  $J$  = 8.5, 7.0 Hz, 1H), 7.50 (dd,  $J$  = 7.1, 1.2 Hz, 1H), 7.42 (s, 1H), 7.38 (dd,  $J$  = 8.6, 4.2 Hz, 1H), 7.18 (d,  $J$  = 15.7 Hz, 1H), 6.89 (s, 1H), 6.81 (d,  $J$  = 8.8 Hz, 2H), 6.66 (d,  $J$  = 8.8 Hz, 2H), 6.19 (d,  $J$  = 15.7 Hz, 1H), 4.02 (s, 3H), 3.92 (s, 3H), 3.73 (s, 3H). **<sup>13</sup>C NMR (100 MHz, CDCl<sub>3</sub>):**  $\delta$  193.05, 161.34, 150.93, 150.34, 148.08, 142.62, 139.18, 134.34, 133.65, 132.13, 132.03, 131.64, 129.62 (2C), 128.58, 128.46, 128.19, 127.45, 127.02, 123.24, 121.54, 114.09 (2C), 111.90, 56.19 (2C), 55.29. **HRMS (ESI):**  $m/z$  calcd for  $C_{27}H_{24}NO_4$  ( $M+H$ )<sup>+</sup> 426.1705 found 426.1693.

**(E)-1-(3-Methyl-2-(quinolin-4-yl)phenyl)-3-phenylprop-2-en-1-one (7i).**

This compound was isolated as pale-yellow solid by following the general procedure-2. 150

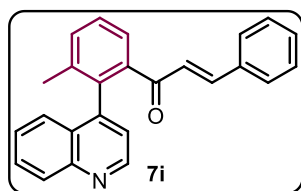

mg of **AF** afforded 157 mg of **7i** (78% yield), M.P = 86-89 °C.  $R_f$  = 0.4 (3:7 EtOAc: Hexanes, visualized by 254 nm UV light). **IR (thin film, neat):**  $\nu_{max}/cm^{-1}$  3060, 2922, 1668, 1643, 1601, 1574, 1505, 1448, 1330, 1266, 1055, 979, 845, 828, 761, 734, 701. **<sup>1</sup>H NMR (400 MHz, CDCl<sub>3</sub>):**  $\delta$  8.88 (d,  $J$  = 4.4 Hz, 1H), 8.14 (d,  $J$  = 8.4 Hz, 1H), 7.70 (ddd,  $J$  = 8.4, 6.8, 1.5 Hz, 1H), 7.62-7.56 (m, 2H), 7.53-7.47 (m, 3H), 7.26 (dd,  $J$  =

8.3, 6.0 Hz, 2H), 7.20 (dd,  $J = 7.4, 5.4$  Hz, 3H), 7.04-7.00 (m, 2H), 6.56 (d,  $J = 15.9$  Hz, 1H), 2.01 (s, 3H).  $^{13}\text{C}$  NMR (100 MHz,  $\text{CDCl}_3$ ):  $\delta$  194.92, 150.05, 148.23, 146.38, 144.67, 140.84, 137.35, 135.50, 134.14, 132.52, 130.47, 130.13, 129.41, 128.73(2C), 128.44, 128.15(2C), 127.31, 127.18, 126.06, 125.81, 125.67, 122.24, 20.21. HRMS (ESI):  $m/z$  calcd for  $\text{C}_{25}\text{H}_{20}\text{NO}$  ( $\text{M}+\text{H}$ ) $^+$  350.1545 found 350.1551.

**(E)-3-phenyl-1-(1-(quinolin-4-yl)naphthalen-2-yl)prop-2-en-1-one (7j).**

This compound was isolated as reddish-brown sticky oil by following the general procedure-

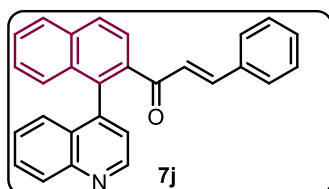

2. 200 mg of **AF** afforded 220 mg of **7j** (90% yield),  $R_f = 0.4$  (3:7 EtOAc: Hexanes, visualized by 254 nm UV light). IR (thin film, neat):  $\nu_{\text{max}}/\text{cm}^{-1}$  2953, 2922, 2852, 1659, 1638, 1581, 1506, 1420, 1388, 1367, 1207, 1011, 971, 854, 762, 708.  $^1\text{H}$  NMR (400 MHz,  $\text{CDCl}_3$ ):  $\delta$  8.96 (d,  $J = 4.3$  Hz, 1H), 8.24-8.15 (m, 1H),

8.13-8.06 (m, 1H), 8.05-7.96 (m, 1H), 7.85 (d,  $J = 8.5$  Hz, 1H), 7.72 (ddd,  $J = 8.4, 6.6, 1.7$  Hz, 1H), 7.59 (ddd,  $J = 8.2, 6.7, 1.3$  Hz, 1H), 7.50 – 7.40 (m, 2H), 7.40-7.34 (m, 2H), 7.32-7.17 (m, 5H), 6.99-6.92 (m, 2H), 6.59 (d,  $J = 16.0$  Hz, 1H).  $^{13}\text{C}$  NMR (100 MHz,  $\text{CDCl}_3$ ):  $\delta$  195.24, 150.00, 148.16, 145.24, 144.73, 138.06, 134.16, 134.07, 131.83, 130.55, 130.04, 129.59, 129.20, 128.75 (2C), 128.34, 128.18 (2C), 127.61 (2C), 127.37 (2C), 127.28, 127.06, 126.33, 125.84, 124.93, 123.56. HRMS (ESI):  $m/z$  calcd for  $\text{C}_{28}\text{H}_{20}\text{NO}$  ( $\text{M}+\text{H}$ ) $^+$  386.1545 found 386.1539.

**(E)-3-(3,5-dimethoxyphenyl)-1-(1-(quinolin-4-yl)naphthalen-2-yl)prop-2-en-1-one (7k).**

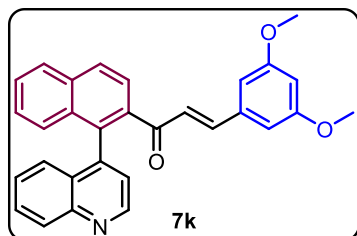

This compound was isolated as pale-yellow oil by following the general procedure-2. 150 mg of **AF** afforded 202 mg of **7k** (90% yield),  $R_f = 0.4$  (3:7 EtOAc: Hexanes, visualized by 254 nm UV light). IR (thin film, neat):  $\nu_{\text{max}}/\text{cm}^{-1}$  2921, 1654, 1593, 1572, 1508, 1462, 1247, 1108, 992, 829, 808.  $^1\text{H}$  NMR (400 MHz,  $\text{CDCl}_3$ ):  $\delta$  8.97 (d,  $J = 4.3$  Hz, 1H), 8.20 (d,  $J = 8.5$  Hz, 1H), 8.11 (d,  $J = 8.5$  Hz, 1H), 8.02 (d,  $J = 8.2$  Hz, 1H),

7.84 (d,  $J = 8.5$  Hz, 1H), 7.72 (ddd,  $J = 8.5, 6.4, 1.9$  Hz, 1H), 7.60 (ddd,  $J = 8.2, 6.7, 1.2$  Hz, 1H), 7.50-7.35 (m, 4H), 7.27 (d,  $J = 8.6$  Hz, 1H), 7.22 (d,  $J = 15.9$  Hz, 1H), 6.52 (d,  $J = 15.9$  Hz, 1H), 6.41 (t,  $J = 2.3$  Hz, 1H), 6.18 (d,  $J = 2.3$  Hz, 2H), 3.70 (s, 6H).  $^{13}\text{C}$  NMR (100 MHz,  $\text{CDCl}_3$ ):  $\delta$  195.25, 160.78 (2C), 150.02, 148.13, 145.10, 144.94, 137.96, 135.91, 134.17, 134.03, 131.77, 130.05, 129.65, 129.21, 128.32, 128.11, 127.60, 127.35, 127.17, 127.06, 126.36, 126.07, 124.96, 123.60, 105.90 (2C), 103.16, 55.40, 55.37. HRMS (ESI):  $m/z$  calcd for  $\text{C}_{30}\text{H}_{24}\text{NO}_3$  ( $\text{M}+\text{H}$ ) $^+$  446.1756 found 446.1757.

**(E)-2-methyl-3-phenyl-1-(2-(quinolin-4-yl)phenyl)prop-2-en-1-one (7l).**

This compound was isolated as a reddish-brown solid by following the general procedure-4.

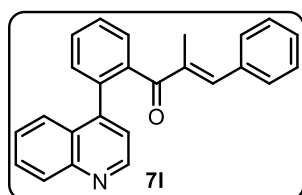

200 mg of **AL** afforded 187 mg of **7l** (70% yield), M.P = 132.8-134 °C.  $R_f = 0.4$  (3:7 EtOAc: Hexanes, visualized by 254 nm UV light). IR (thin film, neat):  $\nu_{\text{max}}/\text{cm}^{-1}$  2923, 1649, 1583, 1508, 1444, 1419, 1357, 1240, 1011, 764.  $^1\text{H}$  NMR (400 MHz,  $\text{CDCl}_3$ ):  $\delta$  8.81

(d,  $J = 4.4$  Hz, 1H), 8.12 (dd,  $J = 8.5, 1.2$  Hz, 1H), 7.76 (dd,  $J = 8.4, 1.4$  Hz, 1H), 7.74-7.69 (m, 1H), 7.65-7.60 (m, 3H), 7.50-7.46 (m, 1H), 7.39 (ddd,  $J = 8.4, 6.9, 1.4$  Hz, 1H), 7.20-7.15 (m, 4H), 6.87 (d,  $J = 1.6$  Hz, 1H), 6.77-6.72 (m, 2H), 1.60 (d,  $J = 1.4$  Hz, 3H).  $^{13}\text{C}$  NMR (100 MHz,  $\text{CDCl}_3$ ):  $\delta$  200.5, 149.5, 148.3, 147.2, 142.9, 140.7, 137.9, 136.3, 135.0, 130.4, 129.9, 129.7, 129.5, 129.1 (2C), 129.0, 128.6, 128.4, 128.1 (2C), 126.9, 126.7, 126.0, 121.9, 12.9. HRMS (ESI):  $m/z$  calcd for  $\text{C}_{25}\text{H}_{20}\text{NO}$  ( $\text{M}+\text{H}^+$ ) 350.1545 found 350.1548.

**(E)-1-(2-(7-Chloroquinolin-4-yl)phenyl)-3-phenylprop-2-en-1-one (7o).**

This compound was isolated as pale-yellow solid by following the general procedure-2. 150 mg of AF afforded 166 mg of **7o** (84% yield),  $R_f = 0.3$

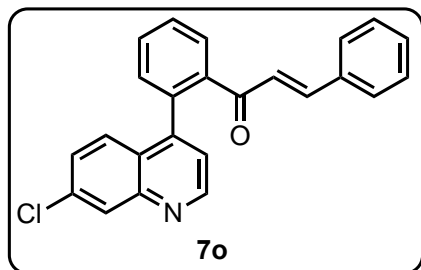

(3:7 EtOAc: Hexanes, visualized by 254 nm UV light). M.P = 123-125 °C. IR (thin film, neat):  $\nu_{\text{max}}/\text{cm}^{-1}$  3058, 2924, 2854, 1667, 1643, 1580, 1497, 1447, 1416, 1331, 1288, 1209, 1070, 1018, 881, 828, 760.  $^1\text{H}$  NMR (400 MHz,  $\text{CDCl}_3$ ):  $\delta$  8.85 (d,  $J = 4.4$  Hz, 1H), 8.09 (d,  $J = 2.0$  Hz, 1H), 7.82 (dd,  $J = 7.0, 1.8$  Hz, 1H), 7.65-7.60 (m, 3H), 7.43-7.40 (m, 2H), 7.30-7.23 (m, 5H), 7.13 (d,  $J = 7.2$  Hz, 2H), 6.66 (d,  $J = 15.9$  Hz, 1H).  $^{13}\text{C}$  NMR (100 MHz,  $\text{CDCl}_3$ ):  $\delta$  194.08, 150.79, 148.73, 147.57, 145.23, 140.11, 136.23, 135.39, 134.02, 130.95 (2C), 130.76, 129.04, 128.91, 128.87 (2C), 128.81, 128.21 (2C), 127.93, 127.13, 125.59, 125.27, 121.96. HRMS (ESI):  $m/z$  calcd for  $\text{C}_{24}\text{H}_{17}\text{ClNO}$  ( $\text{M}+\text{H}^+$ ) 370.0999 found 370.1002.

**(E)-1-(2-(6,7-Dimethoxyquinolin-4-yl)phenyl)-3-phenylprop-2-en-1-one (7p).**

This compound was isolated as pale-yellow sticky oil by following the general procedure-2.

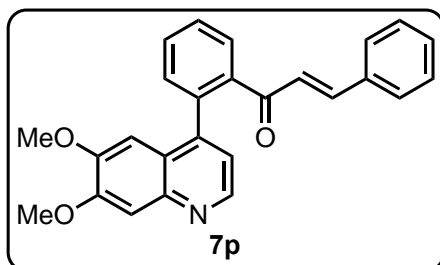

150 mg of AF afforded 173 mg of **7p** (89% yield),  $R_f = 0.5$  (1:1 EtOAc: Hexanes, visualized by 254 nm UV light). IR (thin film, neat):  $\nu_{\text{max}}/\text{cm}^{-1}$  3058, 2960, 2833, 1666, 1643, 1602, 1493, 1350, 1244, 1214, 1109, 1005, 861, 760.  $^1\text{H}$  NMR (400 MHz,  $\text{CDCl}_3$ ):  $\delta$  8.62 (d,  $J = 4.5$  Hz, 1H), 7.76 (dd,  $J = 7.4, 1.2$  Hz, 1H), 7.61-7.52 (m, 2H), 7.42 (dd,  $J = 7.5, 1.2$  Hz, 1H), 7.34 (s, 1H), 7.21-7.11 (m, 5H), 6.98 (d,  $J = 7.2$  Hz, 2H), 6.85 (s, 1H), 6.48 (d,  $J = 15.9$  Hz, 1H), 3.93 (s, 3H), 3.76 (s, 3H).  $^{13}\text{C}$  NMR (100 MHz,  $\text{CDCl}_3$ ):  $\delta$  194.49, 152.25, 150.04, 147.52, 145.58, 145.38, 144.34, 140.38, 137.01, 134.10, 131.06, 130.71, 130.48, 129.06, 128.74 (2C), 128.69, 128.06 (2C), 125.34, 122.35, 120.31, 108.33, 103.11, 56.08, 55.90. HRMS (ESI):  $m/z$  calcd for  $\text{C}_{26}\text{H}_{22}\text{NO}_3$  ( $\text{M}+\text{H}^+$ ) 396.1600 found 396.1601.



### General procedure-5: Synthesis of enone-tethered pyridinium (2a-2z)- and quinolinium salts (4a-4m)

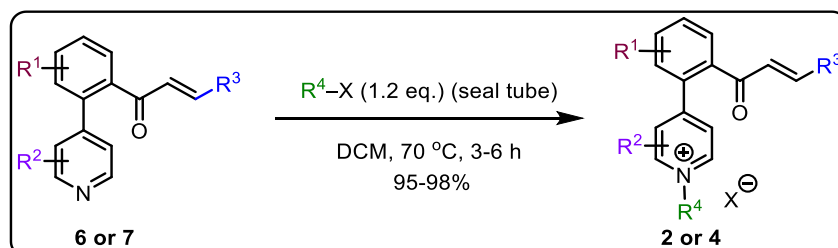

**Scheme S5:** Synthesis of enone-tethered pyridinium **2** and quinolinium salts **4**

In a sealed tube, biaryl enone **6** or **7** (1.0 eq.) was dissolved in DCM (2 mL). Alkyl bromide or iodide (1.2 eq.) was added in one portion, and the reaction mixture was stirred at 70 °C for 3-6 h and monitored the reaction was on TLC. After the completion of starting material, the solvent was evaporated, and the crude product was washed with ethyl acetate 4-5 times. The product was dried over a vacuum to get a pale-yellow or reddish-brown solid and transferred to the final step without further purification.

#### 4-(2-Cinnamoylphenyl)-1-methylpyridin-1-ium (Iodide) (**2a**).

This compound was isolated as an orangish-brown solid by following the general procedure-**5**. 500 mg of **6a** afforded 718 mg of **2a** (98% yield), M.P = 136.8-138.5 °C.  $R_f = 0.2$  (10:1 DCM: MeOH, visualized by 254 nm UV light). **IR (thin film, neat):**  $\nu_{\max}/\text{cm}^{-1}$  2928, 1706, 1638, 1595, 1572, 1448, 1361, 1284, 1214, 1015, 982, 764, 727.  **$^1\text{H}$  NMR (400 MHz,  $\text{CDCl}_3$ ):**  $\delta$  9.26 (d,  $J = 6.1$  Hz, 2H), 7.88 (d,  $J = 6.1$  Hz, 2H), 7.81 (dd,  $J = 7.1, 1.8$  Hz, 1H), 7.66 (td,  $J = 6.9, 1.6$  Hz, 2H), 7.60-7.47 (m, 4H), 7.40 (t,  $J = 3.7$  Hz, 3H), 7.17 (d,  $J = 16.0$  Hz, 1H), 4.60 (s, 3H).  **$^{13}\text{C}$  NMR (100 MHz,  $\text{CDCl}_3$ ):**  $\delta$  193.0, 158.5, 147.8, 144.9 (2C), 138.5, 135.5, 133.8, 132.1, 131.4, 131.0, 130.7, 129.6, 129.1 (2C), 128.8 (2C), 127.8 (2C), 124.6, 48.7. **HRMS (ESI):**  $m/z$  calcd for  $\text{C}_{21}\text{H}_{18}\text{NO}$  ( $\text{M}-\text{I}$ ) $^+$  300.1383 found. 300.1403.

### General procedure-6: Synthesis of vicinal bis-spirocyclic indanone (**3**)

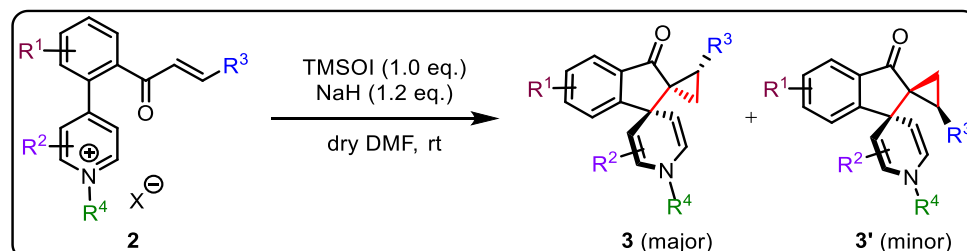

**Scheme S6:** Synthesis of vicinal bis-spirocyclic indanones **3**

A mixture of sodium hydride (60% in oil, 12 mg, 0.28 mmol) and trimethylsulfoxonium iodide (TMSOI) (51 mg, 0.23 mmol) were placed in an oven-dried flask, and dry DMF (4.0 mL) was added to the mixture. After hydrogen evolution ceased, the milky solution turned clear, and the reaction mixture was stirred for 15 min. The compound

**2a** (100 mg, 0.23 mmol) was dissolved in dry DMF (2.0 mL) and was added to the clear solution drop wise over a period of 5-10 min and stirred at room temperature until the reactant **2a** disappeared as monitored by TLC. The reaction mixture was quenched using ice water and extracted with diethyl ether. The organic extracts were combined, dried over anhydrous sodium sulfate, and concentrated. The crude product was purified by silica gel column chromatography using hexane/ethyl acetate.

### Spectral data of all vicinal bis-spirocyclic indanones reported in this study

#### 1''-Methyl-2-phenyl-1''H,3'H-dispiro[cyclopropane-1,2'-indene-1',4''-pyridin]-3'-one (**3a'**).

This compound was isolated as pale-yellow solid by following the general procedure-6. 100 mg of **2a** afforded 18 mg of **3a'** (25% yield),  $R_f = 0.6$  (1:9 EtOAc: Hexanes, visualized by 254 nm UV light), M.P = 122.6-125.3 °C. **IR (thin film, neat):**  $\nu_{\max}/\text{cm}^{-1}$  3055, 1697, 1674, 1600, 1497, 1408, 1290, 1113, 1007, 932, 756, 725. **3a' (Minor):**  $^1\text{H NMR}$  (500 MHz,  $\text{CDCl}_3$ ):  $\delta$  7.72-7.69 (m, 1H), 7.64 (ddd,  $J = 7.8, 7.1, 1.2$  Hz, 1H), 7.57 (dt,  $J = 7.8, 1.0$  Hz, 1H), 7.35 (ddd,  $J = 7.7, 7.1, 1.1$  Hz, 1H), 7.21-7.10 (m, 5H), 5.96 (dd,  $J = 7.8, 1.8$  Hz, 1H), 4.90 (dd,  $J = 7.9, 1.8$  Hz, 1H), 4.12 (dd,  $J = 7.8, 3.0$  Hz, 1H), 3.52 (dd,  $J = 7.8, 3.0$  Hz, 1H), 3.20 (dd,  $J = 9.3, 7.9$  Hz, 1H), 2.71 (s, 3H), 2.02 (dd,  $J = 7.9, 4.2$  Hz, 1H), 1.57 (dd,  $J = 9.3, 4.1$  Hz, 1H).  $^{13}\text{C NMR}$  (125 MHz,  $\text{CDCl}_3$ ):  $\delta$  204.98, 164.03, 137.56, 134.80, 132.64, 130.54, 129.37 (2C), 127.65, 127.55, 127.41, 127.09 (2C), 125.68, 121.52, 104.21, 100.29, 53.20, 45.23, 40.14, 32.66, 18.85.

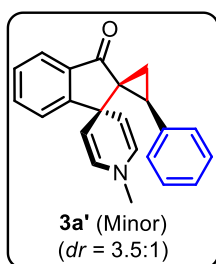

**3a (Major):** This compound was isolated as pale-yellow solid following general procedure-6. 100 mg of **2a** afforded 48 mg of **3a** (61% yield),  $R_f = 0.5$  (1:9 EtOAc: Hexanes, visualized by 254 nm UV light), M.P = 102.4-105.6 °C.  $^1\text{H NMR}$  (400 MHz,  $\text{CDCl}_3$ ):  $\delta$  7.69-7.65 (m, 2H), 7.57 (dd,  $J = 7.6, 1.1$  Hz, 1H), 7.34 (ddd,  $J = 8.0, 4.9, 3.4$  Hz, 1H), 7.29 (d,  $J = 4.4$  Hz, 4H), 7.25-7.18 (m, 1H), 6.20 (dd,  $J = 7.8, 1.7$  Hz, 1H), 6.09 (dd,  $J = 7.8, 1.8$  Hz, 1H), 4.32 (dd,  $J = 7.8, 2.9$  Hz, 1H), 4.09 (dd,  $J = 7.9, 2.9$  Hz, 1H), 3.02 (s, 3H), 2.99 (t,  $J = 8.6$  Hz, 1H), 2.10 (dd,  $J = 8.2, 4.3$  Hz, 1H), 1.71 (dd,  $J = 9.1, 4.3$  Hz, 1H).  $^{13}\text{C NMR}$  (100 MHz,  $\text{CDCl}_3$ ):  $\delta$  202.95, 162.65, 136.43, 134.65, 134.46, 130.49, 129.91, 129.28 (2C), 127.74 (2C), 127.71, 127.48, 126.52, 121.56, 101.94, 101.88, 52.93, 46.14, 40.51, 33.67, 18.70. **HRMS (ESI):**  $m/z$  calcd for  $\text{C}_{22}\text{H}_{18}\text{NO}$  (M-H) $^+$  312.1388 found: 312.1395.

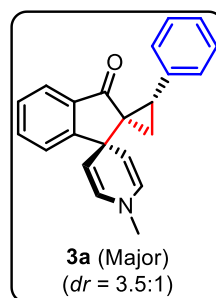

#### 1''-Methyl-2-(naphthalen-1-yl)-1''H,3'H-dispiro[cyclopropane-1,2'-indene-1',4''-pyridin]-3'-one (**3b'**).

This compound was isolated as pale-yellow oil by following the general procedure-6. 80 mg of **2b** afforded 46 mg of **3b** (76% yield combined),  $R_f = 0.5$  (1:9 EtOAc: Hexanes, visualized by 254 nm UV light). **IR (thin film, neat):**  $\nu_{\max}/\text{cm}^{-1}$  3051, 2953, 2907, 2834, 1695, 1673, 1599, 1462, 1293, 1083, 797.  $^1\text{H NMR}$  (400 MHz,  $\text{CDCl}_3$ ):  $\delta$  8.05-7.97 (m, 1H), 7.85-7.78 (m, 2H), 7.72 (d,  $J = 8.1$  Hz, 1H), 7.64 (td,  $J = 7.4, 1.2$  Hz, 1H), 7.53 (d,  $J = 7.7$  Hz, 1H),

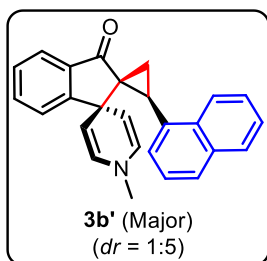

7.42 (ddd,  $J = 8.2, 5.0, 1.4$  Hz, 3H), 7.39-7.33 (m, 1H), 7.31-7.26 (m, 1H), 5.90 (dd,  $J = 7.8, 1.7$  Hz, 1H), 4.32 (dd,  $J = 7.8, 1.7$  Hz, 1H), 4.08 (dd,  $J = 7.8, 3.0$  Hz, 1H), 3.76 (t,  $J = 8.6$  Hz, 1H), 3.16 (dd,  $J = 7.8, 2.9$  Hz, 1H), 2.55 (s, 3H), 2.30 (dd,  $J = 8.0, 4.0$  Hz, 1H), 1.74 (dd,  $J = 9.2, 4.0$  Hz, 1H).  $^{13}\text{C}$  NMR (100 MHz,  $\text{CDCl}_3$ ):  $\delta$  205.29, 163.90, 134.81, 134.76, 134.16, 133.01, 132.78, 130.26, 128.27, 127.67, 127.43, 127.08, 126.66, 125.93, 125.34, 124.59, 124.36, 124.33, 121.61, 103.19, 99.98, 53.35, 45.37, 39.92, 30.14, 18.51. HRMS (ESI):  $m/z$  calcd for  $\text{C}_{26}\text{H}_{22}\text{NO}$  ( $\text{M}+\text{H}$ ) $^+$  364.1701 found 364.1691.

### 1''-Methyl-2-(pyren-1-yl)-1''H,3'H-dispiro[cyclopropane-1,2'-indene-1',4''-pyridin]-3'-one (3c/3c').

This compound was isolated as yellowish-brown sticky oil by following the general procedure-6. 120 mg of 2c afforded 57 mg of 3c' (60% yield)  $R_f = 0.5$  (1:9 EtOAc: Hexanes, visualized by 254 nm UV light). IR (thin film, neat):  $\nu_{\text{max}}/\text{cm}^{-1}$  2929, 1700, 1674, 1601, 1463, 1384, 1360, 1206, 1104, 1006, 845, 726. 3c' (Major):  $^1\text{H}$  NMR (500 MHz,  $\text{CDCl}_3$ ):  $\delta$  8.22 (d,  $J = 9.3$  Hz, 1H), 8.14-8.08 (m, 2H), 8.03-7.96 (m, 4H), 7.94 (t,  $J = 7.6$  Hz, 1H), 7.83-7.76 (m, 2H), 7.58 (td,  $J = 7.4, 1.3$  Hz, 1H), 7.45 (dt,  $J = 7.7, 0.9$  Hz, 1H), 7.37 (td,  $J = 7.5, 1.0$  Hz, 1H), 5.83 (dd,  $J = 7.8, 1.7$  Hz, 1H), 4.07 (dd,  $J = 7.8, 3.0$  Hz, 1H), 4.02 (t,  $J = 8.6$  Hz, 1H), 3.85 (dd,  $J = 7.8, 1.7$  Hz, 1H), 3.14 (dd,  $J = 7.8, 3.0$  Hz, 1H), 2.44 (dd,  $J = 8.0, 4.1$  Hz, 1H), 2.31 (s, 3H), 1.83 (dd,  $J = 9.2, 4.1$  Hz, 1H).  $^{13}\text{C}$  NMR (125 MHz,  $\text{CDCl}_3$ ):  $\delta$  205.03, 163.92, 134.82, 133.00, 131.85, 131.79, 131.37, 130.92, 130.43, 129.98, 127.63, 127.46, 127.37 (2C), 127.18, 126.79, 125.80, 125.19, 125.06, 124.86, 124.71, 124.12, 124.10, 123.57, 121.68, 102.89, 99.81, 53.48, 45.42, 39.66, 30.64, 18.88.

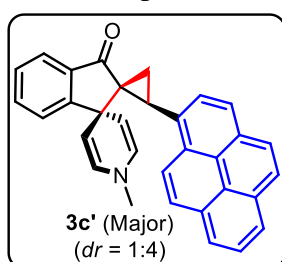

3c (Minor): This compound was isolated as pale-yellow sticky oil by following the general procedure-6. 100 mg of 2c afforded 19 mg of 3c (20% yield)  $R_f = 0.4$  (1:9 EtOAc: Hexanes, visualized by 254 nm UV light).  $^1\text{H}$  NMR (500 MHz,  $\text{CDCl}_3$ ):  $\delta$  8.15 (dd,  $J = 8.6, 1.7$  Hz, 2H), 8.12 (dd,  $J = 7.5, 1.2$  Hz, 1H), 8.06-8.01 (m, 3H), 7.99 (d,  $J = 8.9$  Hz, 1H), 7.92 (t,  $J = 7.6$  Hz, 1H), 7.84 (d,  $J = 9.2$  Hz, 1H), 7.76 (dt,  $J = 7.8, 1.0$  Hz, 1H), 7.68 (td,  $J = 7.5, 1.2$  Hz, 1H), 7.38 (dt,  $J = 7.7, 1.0$  Hz, 1H), 7.28 (td,  $J = 7.3, 1.1$  Hz, 1H), 6.34 (dd,  $J = 7.9, 1.8$  Hz, 1H), 6.12 (dd,  $J = 7.8, 1.8$  Hz, 1H), 4.73 (dd,  $J = 7.9, 2.9$  Hz, 1H), 4.17 (dd,  $J = 7.9, 2.9$  Hz, 1H), 3.54 (t,  $J = 8.4$  Hz, 1H), 3.05 (s, 3H), 2.35 (dd,  $J = 7.8, 4.3$  Hz, 1H), 1.97 (dd,  $J = 9.0, 4.3$  Hz, 1H).  $^{13}\text{C}$  NMR (125 MHz,  $\text{CDCl}_3$ ):  $\delta$  202.56, 162.45, 134.68, 134.51, 131.67, 131.39, 131.15, 130.75, 130.36, 129.63, 128.17, 127.68, 127.60, 127.56 (2C), 126.96, 126.75, 125.59, 124.90, 124.88, 124.77, 124.70, 124.38, 123.56, 121.69, 103.24, 100.21, 52.93, 46.63, 40.55, 31.50, 19.44. HRMS (ESI):  $m/z$  calcd for  $\text{C}_{32}\text{H}_{24}\text{NO}$  ( $\text{M}+\text{H}$ ) $^+$  438.1858 found: 438.1859.

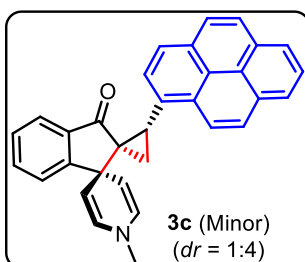

### 1''-Methyl-2-(p-tolyl)-1''H,3'H-dispiro[cyclopropane-1,2'-indene-1',4''-pyridin]-3'-one (3d).

This compound was isolated as pale-yellow semi-solid by following the general procedure-6.

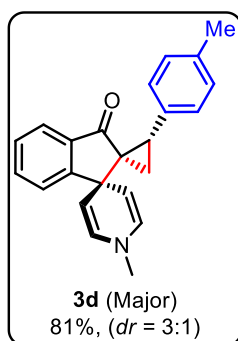

70 mg of **2d** afforded 42 mg of **3d** (81% yield, combined)  $R_f = 0.5$  (1:9 EtOAc: Hexanes, visualized by 254 nm UV light). **IR (thin film, neat):**  $\nu_{\max}/\text{cm}^{-1}$  2924, 2965, 2854, 1701, 1671, 1600, 1517, 1462, 1378, 1208, 1022, 1008, 821, 765, 709.  **$^1\text{H}$  NMR (500 MHz,  $\text{CDCl}_3$ ):**  $\delta$  7.65-7.60 (m, 2H), 7.54 (dt,  $J = 7.6, 1.0$  Hz, 1H), 7.30 (ddd,  $J = 7.6, 5.2, 3.1$  Hz, 1H), 7.14 (d,  $J = 8.0$  Hz, 2H), 7.06 (d,  $J = 7.7$  Hz, 2H), 6.16 (dd,  $J = 7.8, 1.8$  Hz, 1H), 6.05 (dd,  $J = 7.9, 1.8$  Hz, 1H), 4.28 (dd,  $J = 7.9, 2.9$  Hz, 1H), 4.06 (dd,  $J = 7.8, 3.0$  Hz, 1H), 2.98 (s, 3H), 2.93 (t,  $J = 8.6$  Hz, 1H), 2.29 (s, 3H), 2.04 (dd,  $J = 8.2, 4.2$  Hz, 1H), 1.65 (dd,  $J = 9.1, 4.3$  Hz, 1H).  **$^{13}\text{C}$  (125 MHz,  $\text{CDCl}_3$ ):**  $\delta$  202.97, 162.66, 135.92, 134.72, 134.36, 133.28, 130.44, 129.86, 129.10 (2C), 128.50 (2C), 127.66, 127.42, 121.54, 102.05, 101.95, 52.89, 46.13, 40.48, 33.46, 21.18, 18.73. **HRMS (ESI):**  $m/z$  calcd for  $\text{C}_{23}\text{H}_{21}\text{NNaO}$  ( $\text{M}+\text{Na}$ ) $^+$  350.1521 found. 350.1546.

### 2-(4-Methoxyphenyl)-1''-methyl-1''*H*,3''*H*-dispiro[cyclopropane-1,2'-indene-1',4''-pyridin]-3'-one (**3e**).

This compound was isolated as pale-yellow solid by following the general procedure-6. 100

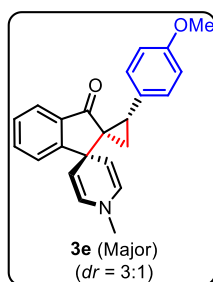

mg of **2e** afforded 56 mg of **3e** (74% yield, combined), M.P = 135-142 °C.  $R_f = 0.4$  (1:4 EtOAc: Hexanes, visualized by 254 nm UV light). **IR (thin film, neat):**  $\nu_{\max}/\text{cm}^{-1}$  2929, 2834, 1698, 1671, 1599, 1513, 1462, 1320, 1209, 1175, 1007, 973, 800, 726, 708.  **$^1\text{H}$  NMR (400 MHz,  $\text{CDCl}_3$ ):**  $\delta$  7.70 -7.64 (m, 2H), 7.57 (d,  $J = 7.6$  Hz, 1H), 7.34 (ddd,  $J = 8.0, 4.8, 3.3$  Hz, 1H), 7.23-7.18 (m, 2H), 6.85-6.81 (m, 2H), 6.19 (dd,  $J = 7.9, 1.7$  Hz, 1H), 6.08 (dd,  $J = 7.9, 1.8$  Hz, 1H), 4.29 (dd,  $J = 7.8, 2.9$  Hz, 1H), 4.08 (dd,  $J = 7.8, 2.9$  Hz, 1H), 3.79 (s, 3H), 3.01 (s, 3H), 2.95 (t,  $J = 8.6$  Hz, 1H), 2.06 (dd,  $J = 8.1, 4.2$  Hz, 1H), 1.69 (dd,  $J = 9.0, 4.3$  Hz, 1H).  **$^{13}\text{C}$  NMR (100 MHz,  $\text{CDCl}_3$ ):**  $\delta$  203.09, 162.71, 158.14, 134.70, 134.40, 130.49, 130.20 (2C), 129.88, 128.34, 127.69, 127.45, 121.51, 113.19 (2C), 102.01, 101.87, 55.15, 52.95, 46.12, 40.50, 33.22, 18.90. **HRMS (ESI):**  $m/z$  calcd for  $\text{C}_{23}\text{H}_{22}\text{NO}_2$  ( $\text{M}+\text{H}$ ) $^+$  344.1651, found: 344.1663.

### 2-(3,5-Dimethoxyphenyl)-1''-methyl-1''*H*,3''*H*-dispiro[cyclopropane-1,2'-indene-1',4''-pyridin]-3'-one (**3f**).

This compound was isolated as yellowish-brown semi-solid by following the general

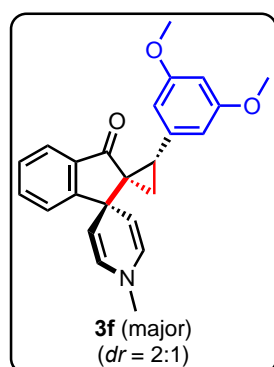

procedure-6. 120 mg of **2f** afforded 70 mg of **3f** (77% yield, combined),  $R_f = 0.4$  (3:7 EtOAc: Hexanes, visualized by 254 nm UV light). **IR (thin film, neat):**  $\nu_{\max}/\text{cm}^{-1}$  2927, 1688, 1671, 1595, 1495, 1358, 1277, 1118, 1011, 866, 725.  **$^1\text{H}$  NMR (400 MHz,  $\text{CDCl}_3$ ):**  $\delta$  7.71-7.63 (m, 2H), 7.58 (d,  $J = 7.6$  Hz, 1H), 7.39-7.30 (m, 1H), 6.44 (d,  $J = 2.3$  Hz, 2H), 6.33 (t,  $J = 2.3$  Hz, 1H), 6.18 (dd,  $J = 7.8, 1.8$  Hz, 1H), 6.08 (dd,  $J = 7.9, 1.8$  Hz, 1H), 4.29 (dd,  $J = 7.8, 3.0$  Hz, 1H), 4.07 (dd,  $J = 7.9, 3.0$  Hz, 1H), 3.78 (s, 6H), 3.01 (s, 3H), 2.92 (t,  $J = 8.6$  Hz, 1H), 2.05 (dd,  $J = 8.2, 4.3$  Hz, 1H), 1.66 (dd,  $J = 9.0, 4.3$  Hz,

1H).  $^{13}\text{C}$  NMR (100 MHz,  $\text{CDCl}_3$ ):  $\delta$  202.86, 162.57, 160.13 (2C), 139.01, 134.63, 134.49, 130.50, 129.91, 127.71, 127.51, 121.57, 107.59 (2C), 101.86, 101.77, 98.45, 55.24, 55.21, 52.93, 46.11, 40.50, 33.81, 18.80. HRMS (ESI):  $m/z$  calcd for  $\text{C}_{24}\text{H}_{24}\text{NO}_3$  ( $\text{M}+\text{H}^+$ ) 374.1756 found 374.1768.

### 2-(3-Fluorophenyl)-1''-methyl-1''H,3'H-dispiro[cyclopropane-1,2'-indene-1',4''-pyridin]-3'-one (3g).

This compound was isolated as a pale-yellow liquid by following the general procedure-6. 80

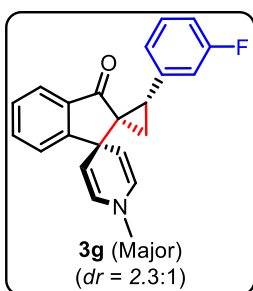

mg of **2g** afforded 48 mg of **3g** (81% yield, combined),  $R_f$  = 0.5 (1:9 EtOAc: Hexanes, visualized by 254 nm UV light). IR (thin film, neat):

$\nu_{\text{max}}/\text{cm}^{-1}$  2929, 1700, 1671, 1614, 1600, 1587, 1446, 1382, 1222, 1206, 1011, 942, 729, 680.  $^1\text{H}$  NMR (400 MHz,  $\text{CDCl}_3$ ):  $\delta$  7.71-7.64 (m, 2H), 7.58 (dt,  $J$  = 7.7, 1.1 Hz, 1H), 7.35 (ddd,  $J$  = 8.0, 4.6, 3.7 Hz, 1H), 7.30-7.20 (m, 1H), 7.06 (d,  $J$  = 7.4 Hz, 1H), 7.00 (dt,  $J$  = 10.1, 2.1 Hz, 1H), 6.90 (td,  $J$  = 8.5, 2.6 Hz, 1H), 6.20 (dd,  $J$  = 7.9, 1.8 Hz, 1H), 6.09 (dd,  $J$  = 7.9, 1.8 Hz, 1H), 4.29 (dd,  $J$  = 7.8, 3.0 Hz, 1H), 4.08 (dd,  $J$  =

7.9, 3.0 Hz, 1H), 3.02 (s, 3H), 2.95 (t,  $J$  = 8.6 Hz, 1H), 2.06 (dd,  $J$  = 8.1, 4.3 Hz, 1H), 1.71 (dd,  $J$  = 9.0, 4.3 Hz, 1H).  $^{13}\text{C}$  NMR (100 MHz,  $\text{CDCl}_3$ ):  $\delta$  202.80, 162.61, 162.48 (d,  $J_{\text{C-F}}$  = 243.2 Hz), 139.25 (d,  $J_{\text{C-F}}$  = 7.7 Hz), 134.66, 134.47, 130.58, 130.02, 129.05 (d,  $J_{\text{C-F}}$  = 8.2 Hz), 127.78 (2C), 127.58, 124.95 (d,  $J_{\text{C-F}}$  = 2.8 Hz), 121.58, 116.22 (d,  $J_{\text{C-F}}$  = 21.4 Hz), 113.45 (d,  $J_{\text{C-F}}$  = 20.8 Hz), 101.68, 53.00, 46.12, 40.51, 33.07, 18.74.  $^{19}\text{F}$  NMR (376 MHz,  $\text{CDCl}_3$ ):  $\delta$  -114.45. HRMS (ESI):  $m/z$  calcd for  $\text{C}_{22}\text{H}_{19}\text{FNO}$  ( $\text{M}+\text{H}^+$ ) 332.1451 found: 332.1458.

### 2-(2-Bromophenyl)-1''-methyl-1''H,3'H-dispiro[cyclopropane-1,2'-indene-1',4''-pyridin]-3'-one (3h').

This compound was isolated as yellowish-brown semi-solid by following the general procedure-6. 100 mg of **2h** afforded 60 mg of **3h'** (77% yield,

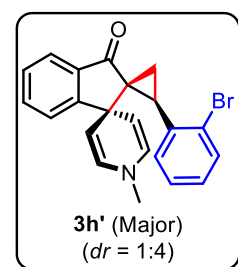

combined),  $R_f$  = 0.6 (1:9 EtOAc: Hexanes, visualized by 254nm UV light). IR (thin film, neat):  $\nu_{\text{max}}/\text{cm}^{-1}$  3054, 2956, 2920, 2836, 1699, 1674, 1600, 1463, 1378, 1292, 1208, 1023, 1007, 765, 748, 719.  $^1\text{H}$

NMR (400 MHz,  $\text{CDCl}_3$ ):  $\delta$  7.76 (dt,  $J$  = 7.6, 1.0 Hz, 1H), 7.67 (td,  $J$  = 7.4, 1.2 Hz, 1H), 7.59 (dt,  $J$  = 7.7, 0.9 Hz, 1H), 7.45 (dd,  $J$  = 7.9, 1.3 Hz, 1H), 7.39 (td,  $J$  = 7.4, 1.1 Hz, 1H), 7.18 (dd,  $J$  = 7.3, 1.3 Hz, 1H), 7.13 (dd,  $J$  = 7.8, 1.9 Hz, 1H), 7.07 (dd,  $J$  = 7.5, 1.9 Hz, 1H), 5.92 (dd,  $J$  = 7.8, 1.7 Hz, 1H), 4.87 (dd,  $J$  = 7.9, 1.7 Hz, 1H), 4.06 (dd,  $J$  = 7.8, 3.0 Hz, 1H), 3.86 (dd,  $J$  = 7.9, 3.0 Hz, 1H), 3.31 (t,  $J$  = 8.6 Hz, 1H), 2.63 (s, 3H), 2.05 (dd,  $J$  = 8.1, 4.2 Hz, 1H), 1.61 (dd,  $J$  = 9.1, 4.2 Hz, 1H).  $^{13}\text{C}$  NMR (100 MHz,  $\text{CDCl}_3$ ):  $\delta$  204.45, 163.63, 137.73, 134.81, 132.82, 131.64, 130.32, 128.86, 128.76, 127.61, 127.59, 127.45, 127.28, 126.06, 121.70, 102.28, 100.12, 52.25, 45.25, 39.94, 33.46, 18.44. HRMS (ESI):  $m/z$  calcd for  $\text{C}_{22}\text{H}_{19}\text{BrNO}$  ( $\text{M}+\text{H}^+$ ) 392.0650 found: 392.0643.

### 1'-Methyl-2-(thiophen-2-yl)-1''H,3'H-dispiro[cyclopropane-1,2'-indene-1',4''-pyridin]-3'-one (3i).

This compound was isolated as reddish-brown semi-solid by following the general procedure-6. 100 mg of **2i** afforded 54 mg of **3i** (73% yield, combined),  $R_f = 0.6$  (1:9 EtOAc: Hexanes, visualized by 254 nm UV light). **IR (thin film, neat):**  $\nu_{\max}/\text{cm}^{-1}$  2963, 2911, 1700, 1671, 1599, 1462, 1315, 1222, 1105, 993, 765, 695.  **$^1\text{H}$  NMR (400 MHz,  $\text{CDCl}_3$ ):**  $\delta$  7.72-7.64 (m, 2H), 7.62 (dt,  $J = 7.7, 1.1$  Hz, 1H), 7.36 (ddd,  $J = 8.0, 5.0, 3.2$  Hz, 1H), 7.14 (dd,  $J = 4.4, 1.9$  Hz, 1H), 6.96 (d,  $J = 4.5$  Hz, 2H), 6.19 (dd,  $J = 7.8, 1.7$  Hz, 1H), 6.08 (dd,  $J = 7.9, 1.8$  Hz, 1H), 4.26 (dd,  $J = 7.8, 2.9$  Hz, 1H), 4.06 (dd,  $J = 7.8, 2.9$  Hz, 1H), 3.01 (m, 4H), 2.08 (dd,  $J = 7.8, 4.2$  Hz, 1H), 1.79 (dd,  $J = 9.0, 4.2$  Hz, 1H).  **$^{13}\text{C}$  NMR (100 MHz,  $\text{CDCl}_3$ ):**  $\delta$  202.16, 162.49, 140.39, 134.60, 134.48, 130.69, 130.00, 127.72, 127.58, 126.59, 126.33, 123.98, 121.64, 101.77, 101.44, 53.06, 46.13, 40.51, 27.79, 20.30. **HRMS (ESI):**  $m/z$  calcd for  $\text{C}_{20}\text{H}_{18}\text{NOS}$  ( $\text{M}+\text{H}$ ) $^+$  320.1109 found: 320.1120.

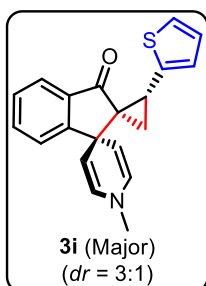

### 1'-Methyl-2-propyl-1''H,3'H-dispiro[cyclopropane-1,2'-indene-1',4''-pyridin]-3'-one (3j).

This compound was isolated as pale-yellow oil by following the general procedure-6. 120 mg of **2j** afforded 63 mg of **6j** (74% yield, combined)  $R_f = 0.6$  (1:9 EtOAc: Hexanes, visualized by 254 nm UV light). **IR (thin film, neat):**  $\nu_{\max}/\text{cm}^{-1}$  3055, 1697, 1674, 1600, 1497, 1405, 1290, 1107, 1010, 930, 760, 719.  **$^1\text{H}$  NMR (400 MHz,  $\text{CDCl}_3$ ):**  $\delta$  7.71-7.59 (m, 3H), 7.37 (ddd,  $J = 8.0, 6.8, 1.5$  Hz, 1H), 6.04 (ddd,  $J = 28.4, 7.8, 1.8$  Hz, 2H), 4.03 (ddd,  $J = 35.0, 7.8, 2.9$  Hz, 2H), 2.96 (s, 3H), 1.78-1.66 (m, 3H), 1.39 (dq,  $J = 7.9, 3.8$  Hz, 2H), 1.33-1.19 (m, 2H), 0.89 (t,  $J = 7.4$  Hz, 3H).  **$^{13}\text{C}$  NMR (100 MHz,  $\text{CDCl}_3$ ):**  $\delta$  205.76, 162.87, 134.71, 134.30, 130.05, 129.63, 127.68, 127.37, 121.23, 102.15, 102.00, 49.55, 46.04, 40.43, 30.32, 28.02, 23.14, 21.46, 13.91. **HRMS (ESI):**  $m/z$  calcd for  $\text{C}_{19}\text{H}_{21}\text{NO}$  ( $\text{M}$ ) $^+$  279.1623 found: 279.1654.

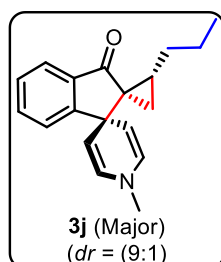

### 1'-Methyl-2-phenyl-1''H,3'H-dispiro[cyclopropane-1,2'-cyclopenta[a]naphthalene-1',4''-pyridin]-3'-one (3k).

This compound was isolated as yellowish-brown sticky oil following general procedure-6. 80 mg of **2k** afforded 44 mg of **3k** (73% yield, combined),  $R_f = 0.5$  (1:9 EtOAc: Hexanes, visualized by 254 nm UV light). **IR (thin film, neat):**  $\nu_{\max}/\text{cm}^{-1}$  2929, 2958, 1711, 1699, 1674, 1594, 1454, 1310, 1221, 1038, 1006, 764, 700.  **$^1\text{H}$  NMR (500 MHz,  $\text{CDCl}_3$ ):**  $\delta$  8.61-8.56 (m, 1H), 7.95-7.89 (m, 1H), 7.81-7.76 (m, 1H), 7.64-7.54 (m, 3H), 7.32-7.22 (m, 4H), 7.21-7.16 (m, 1H), 6.21 (dd,  $J = 7.9, 1.8$  Hz, 1H), 6.14 (dd,  $J = 7.9, 1.7$  Hz, 1H), 4.41 (dd,  $J = 7.9, 3.0$  Hz, 1H), 4.17 (dd,  $J = 7.9, 2.9$  Hz, 1H), 3.13 (s, 3H), 3.10 (t,  $J = 8.7$  Hz, 1H), 2.11 (dd,  $J = 8.3, 4.3$  Hz, 1H), 1.81 (dd,  $J = 9.2, 4.3$  Hz, 1H).  **$^{13}\text{C}$  NMR (125 MHz,  $\text{CDCl}_3$ ):**  $\delta$  202.47, 159.10, 137.78, 136.50, 133.11, 131.05, 130.51, 130.36, 129.31(3C), 129.23, 127.96, 127.77 (2C), 126.51,

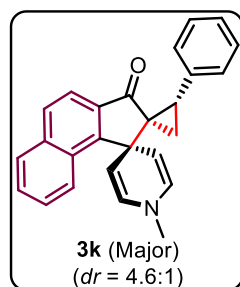



126.36, 126.18, 118.38, 103.04, 102.32, 54.00, 46.51, 40.75, 32.70, 18.12. **HRMS (ESI):**  $m/z$  calcd for  $C_{26}H_{22}NO$  ( $M+H$ )<sup>+</sup> 364.1701 found 364.1708.

### 1',7'-Dimethyl-2-phenyl-1''H,3'H-dispiro[cyclopropane-1,2'-indene-1',4''-pyridin]-3'-one (3l).

This compound was isolated as reddish-brown oil by following the general procedure-6. 100 mg of **2i** afforded 52 mg of **3i** (71% yield, combined)  $R_f = 0.6$  (1:9 EtOAc: Hexanes, visualized by 254 nm UV light). **IR (thin film, neat):**  $\nu_{max}/cm^{-1}$  2927, 2854, 1697, 1671, 1599, 1478, 1379, 1217, 1199, 1015, 765, 694. **<sup>1</sup>H NMR (500 MHz, CDCl<sub>3</sub>):**  $\delta$  7.44 (ddd,  $J = 7.6, 1.3, 0.7$  Hz, 1H), 7.38 (dt,  $J = 7.4, 1.0$  Hz, 1H), 7.28-7.22 (m, 5H), 7.20-7.15 (m, 1H), 6.12 (dd,  $J = 7.9, 1.7$  Hz, 1H), 6.05 (dd,  $J = 7.9, 1.7$  Hz, 1H), 4.21 (dd,  $J = 7.9, 2.9$  Hz, 1H), 3.97 (dd,  $J = 7.9, 2.9$  Hz, 1H), 3.00 (s, 4H), 2.50 (s, 3H), 2.07 (dd,  $J = 8.3, 4.2$  Hz, 1H), 1.72 (dd,  $J = 9.1, 4.2$  Hz, 1H). **<sup>13</sup>C (125 MHz, CDCl<sub>3</sub>):**  $\delta$  203.27, 157.00, 138.21, 136.97, 136.55, 135.33, 130.85, 130.62, 129.29 (2C), 127.73, 127.72 (2C), 126.47, 119.68, 100.74, 100.22, 53.45, 46.01, 40.52, 33.60, 18.78, 17.95. **HRMS (ESI):**  $m/z$  calcd for  $C_{23}H_{22}NO_2$  ( $M+H$ )<sup>+</sup> 328.1701 found: 328.1710.

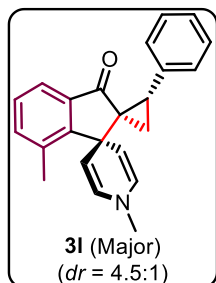

### 5',6'-Dimethoxy-1''-methyl-2-phenyl-1''H,3'H-dispiro[cyclopropane-1,2'-indene-1',4''-pyridin]-3'-one (3m).

This compound was isolated as pale-yellow semi-solid by following the general procedure-6. 100 mg of **2m** afforded 59 mg of **3m** (77% yield, combined)  $R_f = 0.4$  (1:4 EtOAc: Hexanes, visualized by 254 nm UV light). **IR (thin film, neat):**  $\nu_{max}/cm^{-1}$  2929, 1689, 1670, 1593, 1494, 1359, 1279, 1121, 1018, 869, 722. **<sup>1</sup>H NMR (400 MHz, CDCl<sub>3</sub>):**  $\delta$  7.30-7.24 (m, 4H), 7.23-7.16 (m, 1H), 7.05 (s, 1H), 7.02 (s, 1H), 6.19 (dd,  $J = 7.8, 1.7$  Hz, 1H), 6.08 (dd,  $J = 7.9, 1.8$  Hz, 1H), 4.28 (dd,  $J = 7.8, 2.9$  Hz, 1H), 4.07 (dd,  $J = 7.9, 2.9$  Hz, 1H), 4.02 (s, 3H), 3.87 (s, 3H), 3.02 (s, 3H), 2.93 (t,  $J = 8.6$  Hz, 1H), 2.04 (dd,  $J = 8.1, 4.3$  Hz, 1H), 1.66-1.62 (m, 1H). **<sup>13</sup>C NMR (100 MHz, CDCl<sub>3</sub>):**  $\delta$  201.50, 157.81, 155.29, 149.47, 136.71, 130.57, 129.95, 129.27 (2C), 127.70 (3C), 126.39, 108.59, 102.36, 102.16, 101.94, 56.30, 56.11, 53.06, 45.94, 40.52, 32.87, 17.99. **HRMS (ESI):**  $m/z$  calcd for  $C_{24}H_{24}NO_3$  ( $M+H$ )<sup>+</sup> 374.1756, found 374.1742.

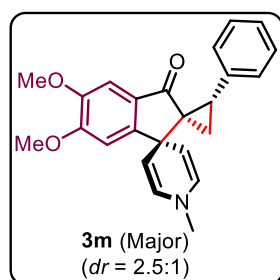

### 5',6'-Dimethoxy-1''-methyl-2-(naphthalen-1-yl)-1''H,3'H-dispiro[cyclopropane-1,2'-indene-1',4''-pyridin]-3'-one (3n').

This compound was isolated as reddish-brown oil by following the general procedure-6. 120 mg of **2n** afforded 67 mg of **3n'** (71% yield, combined)  $R_f = 0.5$  (1:4 EtOAc: Hexanes, visualized by 254 nm UV light). **IR (thin film, neat):**  $\nu_{max}/cm^{-1}$  3064, 2959, 2871, 1670, 1594, 1278, 1118, 870, 732. **<sup>1</sup>H NMR (500 MHz, CDCl<sub>3</sub>):**  $\delta$  8.03-7.92 (m, 1H), 7.80-7.76 (m, 1H), 7.68 (d,  $J = 8.2$  Hz, 1H), 7.42-7.36 (m, 2H), 7.32 (dd,  $J = 8.2, 7.2$  Hz, 1H), 7.24 (dt,  $J = 7.2, 1.1$  Hz, 1H), 7.22 (s, 1H), 6.88 (s, 1H), 5.87 (dd,  $J = 7.8, 1.8$  Hz, 1H), 4.29 (dd,  $J =$

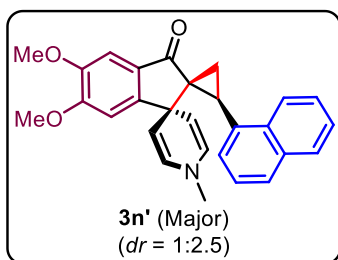

7.8, 1.8 Hz, 1H), 4.02 (dd,  $J = 7.8, 3.0$  Hz, 1H), 3.95 (s, 3H), 3.90 (s, 3H), 3.66 (t,  $J = 8.6$  Hz, 1H), 3.11 (dd,  $J = 7.8, 3.0$  Hz, 1H), 2.54 (s, 3H), 2.20 (dd,  $J = 8.0, 4.0$  Hz, 1H), 1.67 (dd,  $J = 9.2, 4.0$  Hz, 1H).  $^{13}\text{C}$  NMR (125 MHz,  $\text{CDCl}_3$ ):  $\delta$  203.59, 159.31, 155.65, 149.54, 134.78, 134.52, 132.78, 130.25, 128.19, 127.24, 126.50, 125.90, 125.87, 125.29, 124.53, 124.44, 124.20, 108.56, 103.31, 102.25, 100.22, 56.28, 56.22, 53.49, 45.16, 39.89, 29.61, 17.70. HRMS (ESI):  $m/z$  calcd for  $\text{C}_{28}\text{H}_{26}\text{NO}_3$  ( $\text{M}+\text{H}$ ) $^+$  424.1913 found: 424.1919.

**1''-Methyl-2-phenyl-5'-(trifluoromethyl)-1''H,3'H-dispiro[cyclopropane-1,2'-indene-1',4''-pyridin]-3'-one (3o').**

This compound was isolated as a pale-yellow oil by following the general procedure-6. 100

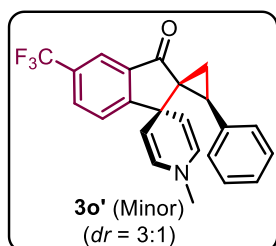

mg of **2o** afforded 20 mg of **3o'** (26% yield)  $R_f = 0.5$  (1:9 EtOAc: Hexanes, visualized by 254 nm UV light). IR (thin film, neat):  $\nu_{\text{max}}/\text{cm}^{-1}$  2928, 1688, 1672, 1595, 1492, 1358, 1277, 1118, 1018, 872, 729. **3o'** (Minor):-  $^1\text{H}$  NMR (400 MHz,  $\text{CDCl}_3$ ): 7.99 (dt,  $J = 1.7, 0.8$  Hz, 1H), 7.90 (dd,  $J = 8.2, 1.8$  Hz, 1H), 7.74 (dt,  $J = 8.1, 0.8$  Hz, 1H), 7.26 – 7.12 (m, 5H), 6.01 (dd,  $J = 7.8, 1.7$  Hz, 1H), 4.95 (dd,  $J = 7.9, 1.7$  Hz, 1H), 4.12 (dd,  $J = 7.8, 3.0$  Hz, 1H), 3.51 (dd,  $J = 7.9, 3.0$  Hz, 1H), 3.27 (dd,  $J = 9.4, 8.0$  Hz, 1H), 2.74 (s, 3H), 2.09 (dd,  $J = 8.0, 4.2$  Hz, 1H), 1.64 (dd,  $J = 9.4, 4.2$  Hz, 2H).  $^{13}\text{C}$  NMR (100 MHz,  $\text{CDCl}_3$ ):  $\delta$  203.88, 166.33, 137.00, 132.85, 131.20 (q,  $J_{\text{C-F}} = 3.4$  Hz), 130.99, 130.01 (q,  $J_{\text{C-F}} = 32.4$  Hz), 129.37 (2C), 128.50, 128.03, 127.19 (2C), 125.93, 123.94 (q,  $J_{\text{C-F}} = 270.9$  Hz), 118.95 (q,  $J_{\text{C-F}} = 3.90$  Hz), 103.33, 99.37, 53.54, 45.61, 40.15, 33.19, 19.35.  $^{19}\text{F}$  NMR (376 MHz,  $\text{CDCl}_3$ ):  $\delta$  62.22.

**3o** (Major): This compound was isolated as a pale-yellow semi-solid following general

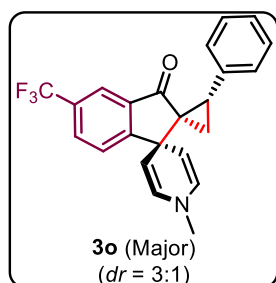

procedure-6. 100 mg of **2o** afforded 40 mg of **3o** (52% yield)  $R_f = 0.4$  (1:8 EtOAc: Hexanes, visualized by 254 nm UV light). IR (thin film, neat):  $\nu_{\text{max}}/\text{cm}^{-1}$  2928, 1688, 1672, 1595, 1492, 1358, 1277, 1118, 1018, 872, 729.  $^1\text{H}$  NMR (400 MHz,  $\text{CDCl}_3$ ):  $\delta$  7.95–7.73 (m, 3H), 7.32–7.21 (m, 5H), 6.23 (dd,  $J = 7.8, 1.8$  Hz, 1H), 6.12 (dd,  $J = 7.9, 1.8$  Hz, 1H), 4.29 (dd,  $J = 7.8, 3.0$  Hz, 1H), 4.07 (dd,  $J = 7.8, 2.9$  Hz, 1H), 3.04 (s, 4H), 2.15 (dd,  $J = 8.3, 4.4$  Hz, 1H), 1.75 (dd,  $J = 9.1, 4.4$  Hz, 1H).  $^{13}\text{C}$  NMR (100 MHz,  $\text{CDCl}_3$ ):  $\delta$  201.71, 165.09, 135.89, 134.80, 131.00, 130.89 (q,  $J_{\text{C-F}} = 3.5$  Hz), 130.36, 130.06 (q,  $J_{\text{C-F}} = 32.5$  Hz), 129.24 (2C), 128.54, 127.84 (2C) 126.74, 123.92 (q,  $J_{\text{C-F}} = 270.8$  Hz), 118.93 (q,  $J_{\text{C-F}} = 3.95$  Hz), 101.08, 100.91, 53.42, 46.47, 40.52, 34.37, 19.17.  $^{19}\text{F}$  NMR (376 MHz,  $\text{CDCl}_3$ ):  $\delta$  62.28. HRMS (ESI):  $m/z$  calcd for  $\text{C}_{23}\text{H}_{19}\text{F}_3\text{NNaO}$  ( $\text{M}+\text{H}$ ) $^+$  404.1238 found: 404.1228.

**1''-Methyl-2-phenyl-1''H,3'H-dispiro[cyclopropane-1,2'-benzo[b]cyclopenta[d]thiophene-1',4''-pyridin]-3'-one (3p).**

This compound was isolated as reddish-brown sticky oil by following the general procedure-6. 100 mg of **2p** afforded 37 mg of **3p** (49% yield, combined)  $R_f = 0.4$  (1:7 EtOAc: Hexanes, visualized by 254 nm UV light). IR (thin film, neat):  $\nu_{\text{max}}/\text{cm}^{-1}$  2928, 1689, 1671, 1599, 1568, 1494, 1447, 1348, 1229, 1041, 768, 747.  $^1\text{H}$  NMR (500 MHz,  $\text{CDCl}_3$ ):  $\delta$  8.05-7.99 (m, 1H), 7.90-7.85 (m, 1H), 7.47-7.40 (m, 2H), 7.31-7.25 (m, 4H), 7.20 (ddt,  $J = 8.6, 7.2, 1.9$  Hz,



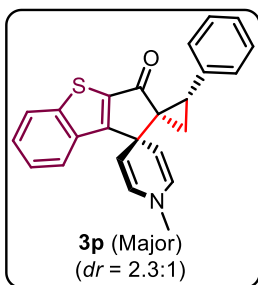

1H), 6.23 (dd,  $J = 7.8, 1.8$  Hz, 1H), 6.16 (dd,  $J = 7.8, 1.7$  Hz, 1H), 4.39 (dd,  $J = 7.8, 3.0$  Hz, 1H), 4.15 (dd,  $J = 7.8, 2.9$  Hz, 1H), 3.10 (s, 3H), 3.00 (t,  $J = 8.8$  Hz, 1H), 2.07-2.04 (m, 1H), 1.74 (dd,  $J = 9.3, 4.5$  Hz, 1H).  **$^{13}\text{C}$  NMR (125 MHz,  $\text{CDCl}_3$ ):**  $\delta$  195.20, 167.72, 148.15, 138.34, 136.21, 134.71, 131.38, 131.20, 129.32 (2C), 127.80 (2C), 127.33, 126.54, 124.64, 124.61, 124.39, 100.94, 100.54, 56.81, 44.85, 40.69, 32.01, 17.31. **HRMS (ESI):**  $m/z$  calcd for  $\text{C}_{24}\text{H}_{20}\text{NOS}$  ( $\text{M}+\text{H}$ )<sup>+</sup> 370.1266 found: 370.1270.

### 1''-Methyl-2-phenyl-1''*H*,3''*H*,4''*H*-dispiro[cyclopropane-1,2'-cyclopenta[*c*]chromene-1',4''-pyridin]-3'-one (3q).

This compound was isolated as pale-yellow oil by following the general procedure-6. 80 mg

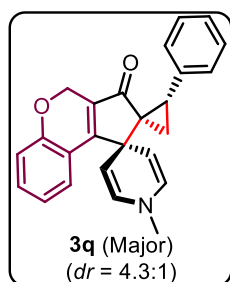

of **2q** afforded 48 mg of **3q** (78% yield, combined)  $R_f = 0.4$  (1:8 EtOAc: Hexanes, visualized by 254 nm UV light). **IR (thin film, neat):**  $\nu_{\text{max}}/\text{cm}^{-1}$  2929, 2854, 1711, 1684, 1670, 1601, 1566, 1496, 1450, 1345, 1227, 1038, 993, 762, 750, 696.  **$^1\text{H}$  NMR (500 MHz,  $\text{CDCl}_3$ ):**  $\delta$  7.81 (dd,  $J = 7.7, 1.7$  Hz, 1H), 7.29-7.22 (m, 5H), 7.21-7.16 (m, 1H), 6.92 (td,  $J = 7.6, 1.2$  Hz, 1H), 6.86 (dd,  $J = 8.2, 1.2$  Hz, 1H), 6.16 (dd,  $J = 7.9, 1.8$  Hz, 1H), 6.09 (dd,  $J = 7.9, 1.8$  Hz, 1H), 4.98 (d,  $J_{AB} = 14.4$  Hz, 1H), 4.93 (d,  $J_{AB} = 14.4$  Hz, 1H) 4.30 (dd,  $J = 7.9, 3.0$  Hz, 1H), 4.07 (dd,  $J = 7.9, 3.0$  Hz, 1H), 3.05 (s, 3H), 2.89 (t,  $J = 8.7$  Hz, 1H), 1.92 (dd,  $J = 8.2, 4.4$  Hz, 1H), 1.65 (dd,  $J = 9.2, 4.4$  Hz, 1H).  **$^{13}\text{C}$  NMR (125 MHz,  $\text{CDCl}_3$ ):**  $\delta$  200.39, 162.06, 156.93, 136.29, 132.05, 131.57, 131.45, 129.18 (2C), 128.42, 127.74 (2C), 126.90, 126.49, 121.01, 120.36, 116.73, 101.42, 100.77, 63.10, 53.81, 46.95, 40.64, 31.78, 17.09.

### 1'',3''-Dimethyl-2-phenyl-1''*H*,3''*H*-dispiro[cyclopropane-1,2'-indene-1',4''-pyridin]-3'-one (3r).

This compound was isolated as pale-yellow oil by following the general procedure-6. 80 mg

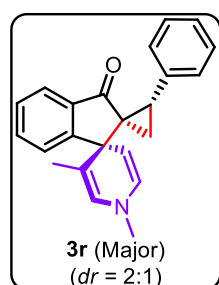

of **2r** afforded 39 mg of **3r** (65% yield, combined)  $R_f = 0.4$  (1:9 EtOAc: Hexanes, visualized by 254 nm UV light). **IR (thin film, neat):**  $\nu_{\text{max}}/\text{cm}^{-1}$  2954, 2927, 1703, 1682, 1602, 1498, 1464, 1292, 1266, 1105, 1081, 765, 749, 700.  **$^1\text{H}$  NMR (500 MHz,  $\text{CDCl}_3$ ):**  $\delta$  7.71 (dt,  $J = 7.6, 1.0$  Hz, 1H), 7.65-7.58 (m, 2H), 7.35 (ddd,  $J = 7.6, 6.8, 1.4$  Hz, 1H), 7.20 (dq,  $J = 6.9, 2.9, 2.5$  Hz, 2H), 7.18-7.11 (m, 3H), 6.01 (dd,  $J = 7.7, 1.7$  Hz, 1H), 4.69 (p,  $J = 1.3$  Hz, 1H) 4.07 (d,  $J = 7.7$  Hz, 1H), 3.16 (dd,  $J = 9.3, 7.9$  Hz, 1H), 2.72 (s, 3H), 1.96 (dd,  $J = 7.9, 4.1$  Hz, 1H), 1.54 (dd,  $J = 9.3, 4.1$  Hz, 1H), 0.72 (d,  $J = 1.3$  Hz, 3H).  **$^{13}\text{C}$  NMR (125 MHz,  $\text{CDCl}_3$ ):**  $\delta$  204.75, 162.47, 136.70, 134.71, 134.29, 130.26, 128.72 (2C), 127.34, 126.83 (3C), 126.08, 125.56, 121.44, 107.13, 99.21, 50.64, 48.62, 39.92, 31.70, 19.89, 16.50. **HRMS (ESI):**  $m/z$  calcd for  $\text{C}_{23}\text{H}_{22}\text{NO}$  ( $\text{M}+\text{H}$ )<sup>+</sup> 328.1701 found: 328.1711.

### 1'',3''-Dimethyl-2-(naphthalen-1-yl)-1''*H*,3''*H*-dispiro[cyclopropane-1,2'-indene-1',4''-pyridin]-3'-one (3s).

This compound was isolated as pale-yellow sticky oil by following the general procedure-6.

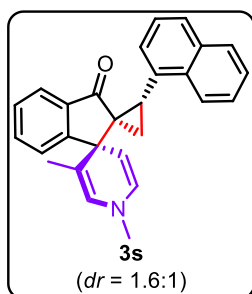

100 mg of **2s** afforded 53 mg of **3s** (69% yield, combined)  $R_f = 0.5$  (1:9 EtOAc: Hexanes, visualized by 254 nm UV light). **IR (thin film, neat):**

$\nu_{\max}/\text{cm}^{-1}$  3053, 2920, 1698, 1682, 1600, 1463, 1293, 1264, 1240, 1084, 983, 776, 765. **3s (Major);-  $^1\text{H NMR}$  (500 MHz,  $\text{CDCl}_3$ ):**  $\delta$  8.23-8.21 (m, 1H), 7.79-7.75 (m, 2H), 7.67 (t,  $J = 8.7$  Hz, 1H), 7.60-7.56 (m, 1H), 7.52 (dt,  $J = 7.7, 1.0$  Hz, 1H), 7.43-7.22 (m, 3H), 7.16 (d,  $J = 7.3$  Hz, 1H), 5.97 (dd,  $J = 7.6, 1.7$  Hz, 1H), 4.28 (q,  $J = 1.3$  Hz, 1H), 4.05 (d,  $J = 7.6$  Hz, 1H), 3.91 (dd,  $J = 9.3, 8.0$  Hz, 1H), 2.60 (s, 3H), 2.25 (dd,  $J =$

7.9, 4.0 Hz, 1H), 1.62 (dd,  $J = 9.3, 4.0$  Hz, 1H), 0.31 (d,  $J = 1.3$  Hz, 3H).  **$^{13}\text{C NMR}$  (125 MHz,  $\text{CDCl}_3$ ):**  $\delta$  205.21, 162.20, 134.60, 134.51, 133.99, 133.45, 132.89, 130.40, 128.15, 127.32, 126.79, 125.97, 125.49, 125.28, 125.14, 124.51, 124.46, 123.73, 121.64, 101.45, 99.0, 52.83, 48.85, 39.95, 27.89, 19.64, 17.03.

**3s' (Minor):-** 7.89 (ddd,  $J = 7.8, 1.9, 0.8$  Hz, 1H), 7.81-7.75 (m, 2H), 7.67 (t,  $J = 8.7$  Hz, 1H), 7.60-7.56 (m, 1H), 7.48 (dt,  $J = 7.7, 1.0$  Hz, 1H), 7.43-7.22 (m, 4H), 7.16 (d,  $J = 7.3$  Hz, 1H), 5.75-5.74 (m, 1H), 4.26 (d,  $J = 5$  Hz, 1H), 3.66 (t,  $J = 8.7$  Hz, 1H), 2.98 (d,  $J = 7.6$  Hz, 1H), 2.55 (s, 3H), 2.00 (dd,  $J = 7.9, 4.0$  Hz, 1H), 1.95 (dd,  $J = 9.3, 4.0$  Hz, 1H), 1.16 (d,  $J = 1.2$  Hz, 3H).  **$^{13}\text{C NMR}$  (125 MHz,  $\text{CDCl}_3$ ):**  $\delta$  205.21, 162.20, 134.80, 134.63, 134.40, 132.8, 128.25, 128.21, 127.41, 127.32, 127.18, 126.79, 125.97, 125.49, 125.31, 125.28, 124.46, 124.24, 121.91, 107.72, 105.40, 50.68, 48.8, 39.8, 33.0, 19.7, 16.6.

### 1'-Butyl-2-phenyl-1'H,3'H-dispiro[cyclopropane-1,2'-indene-1',4''-pyridin]-3'-one (3u')

This compound was isolated as a pale-yellow semi-solid by following the general procedure-

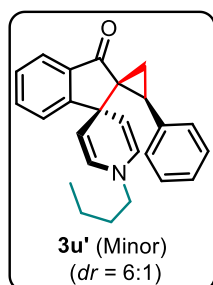

6. 100 mg of **2u** afforded 11 mg of **3u'** (13% yield)  $R_f = 0.6$  (1:9 EtOAc: Hexanes, visualized by 254 nm UV light). **IR (thin film, neat):**  $\nu_{\max}/\text{cm}^{-1}$

2955, 2863, 1699, 1669, 1599, 1497, 1461, 1321, 1029, 998, 766, 696. **3u' (Minor):-  $^1\text{H NMR}$  (500 MHz,  $\text{CDCl}_3$ ):**  $\delta$  7.70 (dt,  $J = 7.6, 1.0$  Hz, 1H), 7.64 (td,  $J = 7.4, 1.2$  Hz, 1H), 7.56 (dt,  $J = 7.7, 1.0$  Hz, 1H), 7.35 (td,  $J = 7.4, 1.1$  Hz, 1H), 7.22-7.14 (m, 4H), 7.13-7.07 (m, 1H), 6.02 (dd,  $J = 7.9, 1.8$  Hz, 1H), 5.04 (dd,  $J = 7.9, 1.8$  Hz, 1H), 4.11 (dd,  $J = 7.9, 3.0$  Hz, 1H),

3.49 (dd,  $J = 7.9, 3.0$  Hz, 1H), 3.17 (dd,  $J = 9.3, 8.0$  Hz, 1H), 2.97-2.89 (m, 1H), 2.85 (q,  $J = 7.1$  Hz, 1H), 1.99 (dd,  $J = 8.0, 4.1$  Hz, 1H), 1.63-1.56 (m, 1H), 1.46-1.37 (m, 2H), 1.34-1.24 (m, 2H), 0.95 (t,  $J = 7.3$  Hz, 3H).  **$^{13}\text{C NMR}$  (125 MHz,  $\text{CDCl}_3$ ):**  $\delta$  205.06, 164.24, 137.53, 134.84, 132.41, 129.78, 129.30 (2C), 127.68, 127.39, 127.29 (2C), 126.83, 125.65, 121.45, 103.98, 100.38, 52.93, 52.85, 45.60, 33.21, 32.11, 19.79, 19.07, 13.84.

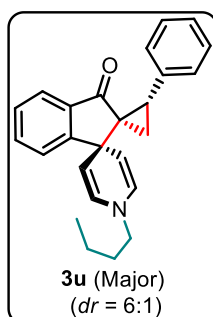

**3u (Major):-** This compound was isolated as greenish-yellow oil by following the general procedure-6. 100 mg of **2u** afforded 56 mg of **3u** (66% yield)  $R_f = 0.5$  (1:9 EtOAc: Hexanes, visualized by 254 nm UV light).  **$^1\text{H NMR}$  (500 MHz,  $\text{CDCl}_3$ ):**  $\delta$  7.65-7.60 (m, 2H), 7.53 (dt,  $J = 7.6, 1.0$  Hz, 1H), 7.29 (ddd,  $J = 7.6, 4.8, 3.4$  Hz, 1H), 7.27-7.23 (m, 4H), 7.17 (dt,  $J = 5.2, 1.8$  Hz, 1H), 6.20 (dd,  $J = 7.9, 1.8$  Hz, 1H), 6.09 (dd,  $J = 7.9, 1.8$  Hz, 1H), 4.27 (dd,  $J = 7.8, 3.0$  Hz, 1H), 4.04 (dd,  $J = 7.9, 2.9$  Hz,

1H), 3.14 (t,  $J = 7.0$  Hz, 2H), 3.01-2.91 (m, 1H), 2.07 (dd,  $J = 8.2, 4.3$  Hz, 1H), 1.67 (dd,  $J = 9.1, 4.3$  Hz, 1H), 1.61-1.49 (m, 2H), 1.40-1.30 (m, 2H), 0.97 (t,  $J = 7.4$  Hz, 3H).  $^{13}\text{C}$  NMR (125 MHz,  $\text{CDCl}_3$ ):  $\delta$  202.95, 162.76, 136.51, 134.67, 134.45, 129.78, 129.29 (2C), 129.18, 127.75 (2C), 127.74, 127.44, 126.51, 121.53, 101.67, 101.59, 53.25, 53.10, 46.52, 33.68, 32.28, 19.82, 18.70, 13.87. HRMS (ESI):  $m/z$  calcd for  $\text{C}_{25}\text{H}_{26}\text{NO}$  ( $\text{M}+\text{H}$ ) $^+$  356.2014 found: 356.2027.

**1''-Hexyl-2-phenyl-1''H,3''H-dispiro[cyclopropane-1,2''-indene-1',4''-pyridin]-3'-one (3v').**

This compound was isolated as pale-yellow oil by following the general procedure-6. 80 mg

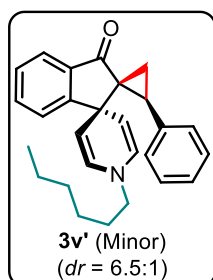

of **2v** afforded 7 mg of **3v'** (12% yield),  $R_f = 0.6$  (1:9 EtOAc: Hexanes, visualized by 254 nm UV light). IR (thin film, neat):  $\nu_{\text{max}}/\text{cm}^{-1}$  2952, 2926, 2857, 1699, 1671, 1600, 1498, 1461, 1375, 1147, 1114, 1007, 931, 724, 695.  $^1\text{H}$  NMR (500 MHz,  $\text{CDCl}_3$ ):  $\delta$  7.70 (dt,  $J = 7.6, 1.0$  Hz, 1H), 7.66-7.62 (m, 1H), 7.56 (dt,  $J = 7.7, 1.0$  Hz, 1H), 7.37-7.32 (m, 1H), 7.27-7.24 (m, 1H), 7.18-7.10 (m, 4H), 6.02 (dd,  $J = 7.9, 1.8$  Hz, 1H), 5.03 (dd,  $J = 7.9, 1.8$  Hz, 1H), 4.11 (dd,  $J = 7.9, 3.0$  Hz, 1H), 3.49 (dd,  $J = 7.9, 3.0$  Hz, 1H), 3.17 (dd,  $J = 9.3, 8.0$  Hz, 1H), 2.94-2.89 (m, 1H), 2.86-2.80 (m, 1H), 1.99 (dd,  $J = 8.0, 4.1$  Hz, 1H), 1.62-1.59 (m, 1H), 1.45-1.40 (m, 2H), 1.36-1.28 (m, 6H), 0.92 (t,  $J = 7.0$  Hz, 3H).  $^{13}\text{C}$  NMR (125 MHz,  $\text{CDCl}_3$ ):  $\delta$  205.06, 164.23, 137.53, 134.82, 132.41, 129.78, 129.29 (2C), 127.68, 127.38, 127.29 (2C), 126.83, 125.65, 121.45, 103.98, 100.38, 53.27, 52.86, 45.61, 33.21, 31.56, 29.97, 26.29, 22.64, 19.07, 14.05.

**3v (Major):-** This compound was isolated as brownish-yellow oil by following the general

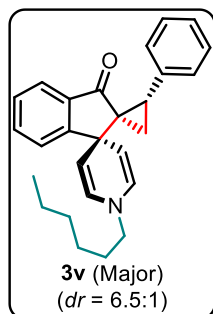

procedure-6. 80 mg of **2v** afforded 41 mg of **3v** (66% yield),  $R_f = 0.5$  (1:9 EtOAc: Hexanes, visualized by 254 nm UV light).  $^1\text{H}$  NMR (500 MHz,  $\text{CDCl}_3$ ):  $\delta$  7.64-7.61 (m, 2H), 7.53 (dt,  $J = 7.6, 1.0$  Hz, 1H), 7.32-7.27 (m, 1H), 7.27-7.23 (m, 4H), 7.19-7.15 (m, 1H), 6.20 (dd,  $J = 7.8, 1.8$  Hz, 1H), 6.09 (dd,  $J = 7.9, 1.7$  Hz, 1H), 4.27 (dd,  $J = 7.8, 2.9$  Hz, 1H), 4.04 (dd,  $J = 7.9, 2.9$  Hz, 1H), 3.14 (t,  $J = 7.0$  Hz, 2H), 3.00-2.93 (m, 1H), 2.07 (dd,  $J = 8.2, 4.3$  Hz, 1H), 1.67 (dd,  $J = 9.1, 4.3$  Hz, 1H), 1.57 (t,  $J = 7.0$  Hz, 2H), 1.33 (qd,  $J = 5.3, 3.6, 3.0$  Hz, 6H), 0.94-0.88 (m, 3H).  $^{13}\text{C}$  NMR (125

MHz,  $\text{CDCl}_3$ ):  $\delta$  202.95, 162.76, 136.51, 134.66, 134.43, 129.76, 129.28 (2C), 129.18, 127.74 (2C), 127.72, 127.43, 126.50, 121.53, 101.65, 101.58, 53.55, 53.06, 46.51, 33.68, 31.52, 30.12, 26.28, 22.64, 18.70, 14.04. HRMS (ESI):  $m/z$  calcd for  $\text{C}_{27}\text{H}_{30}\text{NO}$  ( $\text{M}+\text{H}$ ) $^+$  384.2327 found: 384.2339.

**1''-Benzyl-2-phenyl-1''H,3''H-dispiro[cyclopropane-1,2''-indene-1',4''-pyridin]-3'-one (3w).**

This compound was isolated as reddish-orange oil by following the general procedure-6. 70 mg of **2w** afforded 45 mg of **3w** (75% yield, combined),  $R_f = 0.3$  (1:8 EtOAc: Hexanes, visualized by 254 nm UV light). IR (thin film, neat):  $\nu_{\text{max}}/\text{cm}^{-1}$  3085, 3062, 3027, 1700, 1670, 1601, 1496, 1403, 1324, 1209, 1021, 766, 733.  $^1\text{H}$  NMR (400 MHz,  $\text{CDCl}_3$ ):  $\delta$  7.72-7.65 (m, 2H), 7.59 (dt,  $J = 7.9, 1.1$  Hz, 1H), 7.44 (dd,  $J = 8.1, 6.7$  Hz, 2H), 7.36 (ddd,  $J = 7.9,$

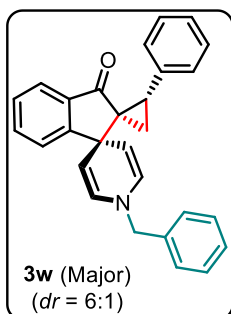

5.7, 2.1 Hz, 2H), 7.33-7.28 (m, 6H), 7.23 (ddd,  $J = 8.4, 3.9, 2.3$  Hz, 1H), 6.33 (dd,  $J = 7.9, 1.8$  Hz, 1H), 6.22 (dd,  $J = 7.9, 1.7$  Hz, 1H), 4.40 (d,  $J = 8.0$  Hz, 3H), 4.17 (dd,  $J = 7.9, 2.9$  Hz, 1H), 3.04 (t,  $J = 8.6$  Hz, 1H), 2.14 (dd,  $J = 8.2, 4.3$  Hz, 1H), 1.74 (dd,  $J = 9.1, 4.3$  Hz, 1H).  $^{13}\text{C}$  NMR (100 MHz,  $\text{CDCl}_3$ ):  $\delta$  202.89, 162.48, 138.36, 136.36, 134.72, 134.53, 130.10, 129.49 (2C), 129.32, 128.84 (2C), 127.79 (2C), 127.72, 127.67, 127.58, 127.01 (2C), 126.58, 121.64, 102.67, 102.56, 57.09, 52.90, 46.34, 33.70, 18.70. HRMS (ESI):  $m/z$  calcd for  $\text{C}_{28}\text{H}_{23}\text{NNaO}$  ( $\text{M}+\text{Na}^+$ ) 412.1677 found 412.1660.

### 1''-(3,5-Dimethoxybenzyl)-2-phenyl-1''H,3'H-dispiro[cyclopropane-1,2'-indene-1',4''-pyridin]-3'-one (3x).

This compound was isolated as pale-yellow solid by following the general procedure-6. 75 mg of **2x** afforded 51 mg of **3x** (78% yield, combined), M.P = 94-96 °C.  $R_f = 0.4$  (1:4 EtOAc: Hexanes, visualized by 254 nm UV light).

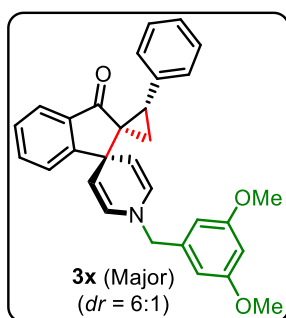

**IR (thin film, neat):**  $\nu_{\text{max}}/\text{cm}^{-1}$  2955, 2923, 2853, 16999, 1671, 1596, 1462, 1429, 1402, 1321, 1204, 1155, 1064, 1021, 1010, 766, 733, 696.  $^1\text{H}$  NMR (400 MHz,  $\text{CDCl}_3$ ):  $\delta$  7.73-7.65 (m, 2H), 7.59 (dt,  $J = 7.6, 1.0$  Hz, 1H), 7.39-7.33 (m, 1H), 7.31 (d,  $J = 4.4$  Hz, 4H), 7.26-7.20 (m, 1H), 6.44 (s, 3H), 6.32 (dd,  $J = 7.9, 1.8$  Hz, 1H), 6.21 (dd,  $J = 7.9, 1.8$  Hz, 1H), 4.40 (dd,  $J = 7.8, 2.9$  Hz, 1H), 4.34 (s, 2H), 4.18 (dd,  $J = 7.9, 2.9$  Hz, 1H), 3.85 (s, 6H), 3.04 (t,  $J = 8.6$  Hz, 1H), 2.14 (dd,  $J = 8.2, 4.3$  Hz, 1H), 1.74 (dd,  $J = 9.1, 4.3$  Hz, 1H).  $^{13}\text{C}$  NMR (100 MHz,  $\text{CDCl}_3$ ):  $\delta$  202.79, 162.45, 161.24 (2C), 140.99, 136.32, 134.73, 134.50, 130.13, 129.54 (2C), 129.29 (2C), 127.79, 127.72, 127.59, 126.59, 121.65, 104.79 (2C), 102.56, 102.48, 99.35, 57.08, 55.39, 55.36, 52.83, 46.32, 33.70, 18.72. HRMS (ESI):  $m/z$  calcd for  $\text{C}_{30}\text{H}_{28}\text{NO}_3$  ( $\text{M}+\text{H}^+$ ) 450.2069 found 450.2086.

### 1''-(Benzo[*b*]thiophen-2-ylmethyl)-2-phenyl-1''H,3'H-dispiro[cyclopropane-1,2'-indene-1',4''-pyridin]-3'-one (3y).

This compound was isolated as reddish-brown oil by following the general procedure-6. 70 mg of **2y** afforded 42 mg of **3y** (70% yield, combined)  $R_f = 0.4$  (1:7 EtOAc: Hexanes, visualized by 254 nm UV light). **IR (thin film, neat):**  $\nu_{\text{max}}/\text{cm}^{-1}$  3052, 2920, 2854, 1698, 1671, 1601, 1461, 1399,

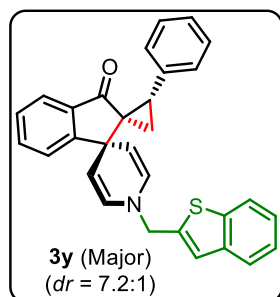

1322, 1206, 1190, 1018, 766, 748.  $^1\text{H}$  NMR (400 MHz,  $\text{CDCl}_3$ ):  $\delta$  7.84 (dd,  $J = 8.0, 1.2$  Hz, 1H), 7.75 (dd,  $J = 6.8, 2.0$  Hz, 1H), 7.65-7.63 (m, 2H), 7.55 (d,  $J = 7.6$  Hz, 1H), 7.39-7.32 (m, 3H), 7.27 (d,  $J = 4.4$  Hz, 4H), 7.21-7.18 (m, 2H), 6.33 (dd,  $J = 8.0, 1.6$  Hz, 1H), 6.22 (dd,  $J = 8.0, 1.6$  Hz, 1H), 4.59 (s, 2H), 4.42 (dd,  $J = 8.0, 2.8$  Hz, 1H), 4.19 (dd,  $J = 8.0, 2.8$  Hz, 1H), 3.01 (t,  $J = 8.4$  Hz, 1H), 2.10 (dd,  $J = 8.4, 4.0$  Hz, 1H), 1.71 (dd,  $J = 9.2, 4.4$  Hz, 1H).  $^{13}\text{C}$  NMR (125 MHz,  $\text{CDCl}_3$ ):  $\delta$  202.73, 162.20, 142.40, 139.86, 139.47, 136.27, 134.75, 134.53, 129.38, 129.30 (2C), 128.77, 127.76 (2C), 127.73, 127.62,

126.58, 124.54, 124.48, 123.49, 122.53, 122.02, 121.67, 103.60, 103.47, 53.08, 52.65, 46.20, 33.70, 18.70. **HRMS (ESI):**  $m/z$  calcd for  $C_{30}H_{24}NOS$  ( $M+H^+$ ) 446.1579 found 446.1566.

**1'',2,2-Trimethyl-1''H,3'H-dispiro[cyclopropane-1,2'-indene-1',4''-pyridin]-3'-one (3z).**

This compound was isolated as a pale-yellow semi-solid by following the general procedure-

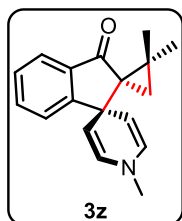

6. 60 mg of **2z** afforded 37 mg of **3z** (88% yield)  $R_f = 0.4$  (1:9 EtOAc:

Hexanes, visualized by 254 nm UV light). **IR (thin film, neat):**  $\nu_{max}/cm^{-1}$  3054, 1699, 1676, 1600, 1498, 1406, 1293, 1111, 1006, 929, 757, 725. **<sup>1</sup>H**

**NMR (400 MHz, CDCl<sub>3</sub>):**  $\delta$  7.70-7.59 (m, 3H), 7.38-7.31 (m, 1H), 6.05 (dd,  $J = 7.9, 1.7$  Hz, 1H), 5.79 (dd,  $J = 7.9, 1.8$  Hz, 1H), 4.25 (dd,  $J = 7.9, 3.0$  Hz, 1H), 4.09 (dd,  $J = 7.9, 2.9$  Hz, 1H), 2.99 (s, 3H), 1.57 (s, 3H), 1.40 (s, 3H),

1.30 (d,  $J = 3.3$  Hz, 1H), 1.19 (d,  $J = 3.3$  Hz, 1H). **<sup>13</sup>C NMR (100 MHz, CDCl<sub>3</sub>):**  $\delta$  206.26, 163.16, 134.32, 133.50, 130.65, 128.35, 127.40, 127.28, 121.25, 105.80, 100.99, 51.99, 46.21, 40.52, 30.30, 30.06, 25.01, 20.01. **HRMS (ESI):**  $m/z$  calcd for  $C_{18}H_{20}NO$  ( $M+H^+$ )<sup>+</sup> 266.1545 found: 266.1549.

### General procedure-7: Synthesis of the polycyclic benzocycloheptanones (5a-5m)

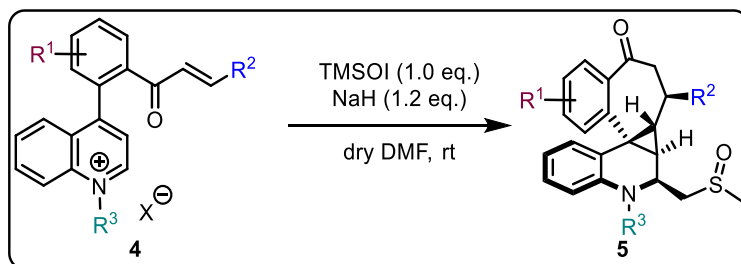

**Scheme S7:** Synthesis of the polycyclic benzocycloheptanones **5a-5m**

A mixture of sodium hydride (60% in oil, 10 mg, 0.28 mmol) and TMSOI (46 mg, 0.23 mmol) was placed in an oven-dried flask, and dry DMF (3.0 mL) was added to the mixture. After the hydrogen evolution ceased and the milky solution turned clear, the reaction mixture was stirred for 15 min. Then **4a** (100 mg, 0.21 mmol) was dissolved in dry DMF (1.0 mL), added to the clear solution drop wise over 5-10 min, and stirred at room temperature until **4a** disappeared as monitored by TLC. The reaction mixture was quenched using ice water and extracted with diethyl ether. The organic extracts were combined, dried over anhydrous sodium sulfate, and concentrated. The crude product was purified by silica gel column chromatography using hexane/ethyl acetate to afford **5a**.

### Spectral data of all the polycyclic benzocycloheptanones reported in this study

#### 1-Methyl-2-((methylsulfinyl)methyl)-3-phenyl-2,2a,3,4-tetrahydro-1H-benzo[6',7']cyclohepta[1',2':2,3]cyclopropa[1,2-c]quinolin-5(2bH)-one (**5a**).

This compound was isolated as pale-yellow solid by following the general procedure-7. 100 mg of **4a** afforded 72 mg of **5a** (78% yield), M.P = 225-227 °C.  $R_f$  = 0.3 (9:1 EtOAc: Hexanes, visualized by 254 nm UV light). **IR (thin film, neat):**  $\nu_{\max}/\text{cm}^{-1}$  3028, 2920, 1679, 1598, 1497, 1282, 1230, 1050, 750.  **$^1\text{H}$  NMR (400 MHz,  $\text{CDCl}_3$ ):**  $\delta$  7.57 (ddd,  $J$  = 8.9, 7.1, 1.8 Hz, 2H), 7.51-7.45 (m, 1H), 7.42 (dd,  $J$  = 7.8, 1.4 Hz, 1H), 7.33 (dd,  $J$  = 8.1, 6.5 Hz, 2H), 7.28-7.23 (m, 1H), 7.24-7.19 (m, 2H), 7.08 (ddd,  $J$  = 8.6, 7.3, 1.7 Hz, 1H), 6.71 (dd,  $J$  = 8.3, 1.1 Hz, 1H), 6.60 (td,  $J$  = 7.4, 1.1 Hz, 1H), 6.48 (dd,  $J$  = 7.7, 1.7 Hz, 1H), 3.93 (ddd,  $J$  = 10.9, 4.4, 2.7 Hz, 1H), 3.30-3.14 (m, 2H), 2.86 (d,  $J$  = 16.3 Hz, 5H), 2.43 (t,  $J$  = 4.8 Hz, 1H), 2.15-2.02 (m, 4H), 1.87 (dd,  $J$  = 10.5, 5.2 Hz, 1H).  **$^{13}\text{C}$  NMR (100 MHz,  $\text{CDCl}_3$ ):**  $\delta$  206.19, 142.71, 142.69, 140.85, 139.31, 132.75, 132.08, 128.96 (2C), 128.25, 128.01, 127.94, 127.41 (2C), 27.15, 127.01, 126.54, 118.29, 112.48, 61.27, 49.65, 48.91, 44.75, 39.01, 35.93, 35.17, 34.66, 31.06. **HRMS (ESI):**  $m/z$  calcd for  $\text{C}_{28}\text{H}_{28}\text{NO}_2\text{S}$  ( $\text{M}+\text{H}^+$ ) 442.1841 found: 442.1832

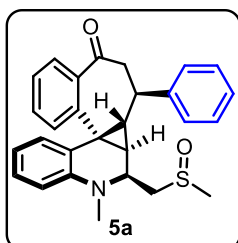

#### 3-(3,5-Dimethoxyphenyl)-1-methyl-2-((methylsulfinyl)methyl)-2,2a,3,4-tetrahydro-1H-benzo[6',7']cyclohepta[1',2':2,3]cyclopropa[1,2-c]quinolin-5(2bH)-one (**5b**).

This compound was isolated as an off-white solid by following the general procedure-7. 80 mg of **4b** afforded 55 mg of **5b** (74% yield), M.P = 102-105 °C.  $R_f$  = 0.1 (10:1 EtOAc: Hexanes, visualized by 254 nm UV light). **IR (thin film, neat):**  $\nu_{\max}/\text{cm}^{-1}$  2928, 2871, 2850,



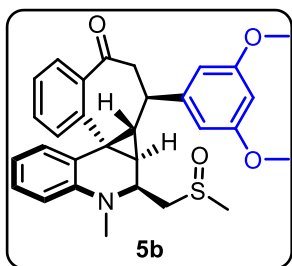

1679, 1595, 1483, 1362, 1204, 1057, 845, 830, 750. **<sup>1</sup>H NMR (400 MHz, CDCl<sub>3</sub>):** δ 7.59-7.53 (m, 2H), 7.53-7.46 (m, 1H), 7.42 (d, *J* = 7.6 Hz, 1H), 7.11-7.05 (m, 1H), 6.71 (d, *J* = 8.3 Hz, 1H), 6.60 (t, *J* = 7.4 Hz, 1H), 6.46 (dd, *J* = 7.6, 1.7 Hz, 1H), 6.36 (s, 3H), 3.94 (dt, *J* = 11.2, 3.1 Hz, 1H), 3.78 (s, 6H), 3.30-3.18 (m, 2H), 2.89 (s, 3H), 2.80-2.70 (m, 1H), 2.43 (t, *J* = 4.7 Hz, 1H), 2.23 (s, 3H), 2.15 (t, *J* = 11.5 Hz, 1H), 1.84 (dd, *J* = 10.8, 5.2 Hz, 1H), 1.68 (d, *J* = 4.7 Hz, 1H). **<sup>13</sup>C NMR (100 MHz, CDCl<sub>3</sub>):** δ 205.97, 161.12 (2C), 145.09, 142.75, 140.80, 139.35, 132.77, 132.14, 128.24, 128.08, 127.89, 127.00, 126.56, 118.27, 112.50, 105.24 (2C), 98.69, 61.57, 55.39, 55.37, 49.64, 48.45, 44.90, 38.95, 35.90, 35.20, 34.97, 30.99. **HRMS (ESI):** *m/z* calcd for C<sub>30</sub>H<sub>32</sub>NO<sub>4</sub>S (M+H<sup>+</sup>) 502.2052 found: 502.2040.

**1-Methyl-2-((methylsulfinyl)methyl)-3-(thiophen-2-yl)-2,2a,3,4-tetrahydro-1H-benzo[6',7']cyclohepta[1',2':2,3]cyclopropa[1,2-c]quinolin-5(2bH)-one (5c).**

This compound was isolated as a reddish-brown solid by following the general procedure-7.

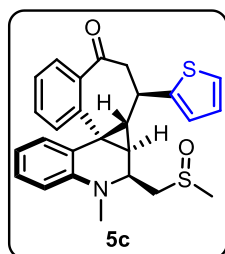

80 mg of **4c** afforded 55 mg of **5c** (69% yield), M.P = 190-193 °C. *R<sub>f</sub>* = 0.3 (4:1 EtOAc: Hexanes, visualized by 254 nm UV light). **IR (thin film, neat):** *v*<sub>max</sub>/cm<sup>-1</sup> 2928, 2853, 1674, 1595, 1494, 1361, 1276, 1041, 963, 764, 701. **<sup>1</sup>H NMR (400 MHz, CDCl<sub>3</sub>):** δ 7.56 (ddd, *J* = 15.2, 7.6, 1.6 Hz, 2H), 7.48 (td, *J* = 7.5, 1.3 Hz, 1H), 7.42 (dd, *J* = 7.7, 1.3 Hz, 1H), 7.20 (dd, *J* = 5.1, 1.2 Hz, 1H), 7.08 (ddd, *J* = 8.6, 7.3, 1.7 Hz, 1H), 6.97 (dd, *J* = 5.1, 3.4 Hz, 1H), 6.87 (dd, *J* = 3.5, 1.2 Hz, 1H), 6.72 (dd, *J* = 8.4, 1.1 Hz, 1H), 6.61 (td, *J* = 7.5, 1.1 Hz, 1H), 6.46 (dd, *J* = 7.6, 1.7 Hz, 1H), 4.01-3.93 (m, 1H), 3.34-3.27 (m, 1H), 3.27-3.13 (m, 2H), 2.97 (d, *J* = 15.6 Hz, 1H), 2.91 (s, 3H), 2.45 (t, *J* = 4.8 Hz, 1H), 2.36 (dd, *J* = 12.3, 10.8 Hz, 1H), 2.30 (s, 3H), 1.92 (dd, *J* = 10.2, 5.1 Hz, 1H). **<sup>13</sup>C NMR (100 MHz, CDCl<sub>3</sub>):** δ 205.33, 146.03, 142.84, 140.62, 139.15, 132.86, 132.09, 128.33, 128.01, 127.94, 127.08 (2C), 126.45, 124.05, 123.65, 118.42, 112.60, 61.30, 50.30, 49.86, 39.96, 39.36, 35.89, 35.74, 34.89, 30.94. **HRMS (ESI):** *m/z* calcd for C<sub>26</sub>H<sub>26</sub>NO<sub>2</sub>S<sub>2</sub> (M+H)<sup>+</sup> 448.1405 found: 448.1394.

**7,8-dimethoxy-1-methyl-2-((methylsulfinyl)methyl)-3-phenyl-2,2a,3,4-tetrahydro-1H-benzo[6',7']cyclohepta[1',2':2,3]cyclopropa[1,2-c]quinolin-5(2bH)-one (5d).**

This compound was isolated as a reddish-brown semi-solid by following the general

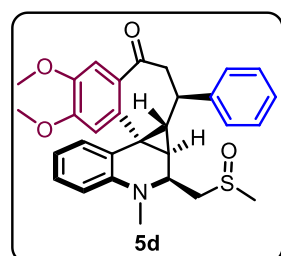

procedure-7. 100 mg of **4d** afforded 71 mg of **5d** (76% yield) *R<sub>f</sub>* = 0.3 (10:0 EtOAc: Hexanes, visualized by 254 nm UV light). **IR (thin film, neat):** *v*<sub>max</sub>/cm<sup>-1</sup> 2930, 2831, 1712, 1674, 1595, 1498, 1445, 1265, 1205, 1171, 1035, 884, 747. **<sup>1</sup>H NMR (500 MHz, CDCl<sub>3</sub>):** δ 7.31 (dd, *J* = 8.0, 6.7 Hz, 2H), 7.26-7.22 (m, 1H), 7.22-7.18 (m, 2H), 7.13 (s, 1H), 7.07 (ddd, *J* = 8.5, 7.3, 1.7 Hz, 1H), 6.77 (s, 1H), 6.69 (dd, *J* = 8.4, 1.1 Hz, 1H), 6.59 (td, *J* = 7.5, 1.1 Hz, 1H), 6.49 (dd, *J* = 7.7, 1.7 Hz, 1H), 3.96 (s, 3H), 3.94-3.91 (m, 1H), 3.89 (s, 3H), 3.27-3.14 (m, 2H), 2.87 (s, 3H), 2.83 (dt, *J* = 16.2, 2.7 Hz, 2H), 2.40 (dd, *J* = 5.2, 4.4 Hz, 1H), 2.06 (s, 4H), 1.81 (dd, *J* = 10.5, 5.3 Hz, 1H). **<sup>13</sup>C NMR (125 MHz, CDCl<sub>3</sub>):** δ 204.49, 152.98, 148.82, 143.02, 142.66,

133.33, 128.93 (2C), 127.80, 127.38 (2C), 127.08, 126.94, 126.88, 118.22, 113.69, 112.38, 110.84, 61.66, 56.24, 56.05, 49.68, 49.08, 44.75, 39.13, 36.06, 36.02, 34.54, 31.02. **HRMS (ESI):** m/z calcd for C<sub>30</sub>H<sub>32</sub>NO<sub>4</sub>S (M+H)<sup>+</sup> 502.2052 found: 502.2067.

**7,8-dimethoxy-1-methyl-2-((methylsulfinyl)methyl)-3-(naphthalen-1-yl)-2,2a,3,4-tetrahydro-1H-benzo[6',7']cyclohepta[1',2':2,3]cyclopropa[1,2-c]quinolin-5b(2bH)-one (5e).**

This compound was isolated as greenish-yellow stick oil by following the general procedure-

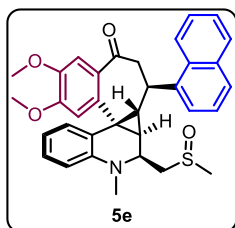

7. 80 mg of **4e** afforded 55 mg of **5e** (73% yield)  $R_f = 0.2$  (9:1 EtOAc: Hexanes, visualized by 254 nm UV light). **IR (thin film, neat):**  $\nu_{\max}/\text{cm}^{-1}$  2925, 2850, 1710, 1664, 1597, 1511, 1363, 1263, 1212, 1038, 750. **<sup>1</sup>H NMR (400 MHz, CDCl<sub>3</sub>):**  $\delta$  7.91-7.88 (m, 2H), 7.75 (dd,  $J = 7.3, 2.0$  Hz, 1H), 7.54-7.43 (m, 4H), 7.24 (s, 1H), 7.08 (ddd,  $J = 8.3, 7.3, 1.7$  Hz, 1H), 6.83 (s, 1H), 6.70 (dd,  $J = 8.4, 1.1$  Hz, 1H), 6.62 (td,  $J = 7.4, 1.1$

Hz, 1H), 6.56 – 6.47 (m, 1H), 4.02 (s, 3H), 3.95 (s, 3H), 3.85-3.82 (m, 2H), 3.49-3.45 (m, 1H), 3.06-2.84 (m, 2H), 2.84 (s, 3H), 2.51 (t,  $J = 4.7$  Hz, 1H), 1.97 (br s, 1H), 1.81 (t,  $J = 11.5$  Hz, 1H), 1.53 (s, 3H). **<sup>13</sup>C NMR (125 MHz, CDCl<sub>3</sub>):**  $\delta$  204.28, 153.20, 148.90, 142.81, 139.61, 133.92, 133.69, 132.64, 130.80, 128.99, 127.76, 127.22, 126.94 (2C), 126.67, 126.09, 125.82 (2C), 123.79, 122.86, 118.33, 113.94, 112.55, 111.06, 61.92, 56.29, 56.08, 49.68, 49.39, 38.47, 37.30, 36.34, 35.93, 35.78, 31.06. **HRMS (ESI):** m/z calcd for C<sub>34</sub>H<sub>34</sub>NO<sub>4</sub>S (M+H)<sup>+</sup> 552.2209 found: 552.2200.

**3-(2-bromophenyl)-7,8-dimethoxy-1-methyl-2-((methylsulfinyl)methyl)-2,2a,3,4-tetrahydro-1H-benzo[6',7']cyclohepta[1',2':2,3]cyclopropa[1,2-c]quinolin-5b(2bH)-one (5f).**

This compound was isolated as reddish-brown solid by following the general procedure-7. 80

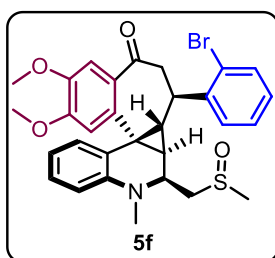

mg of **4f** afforded 58 mg of **5f** (77% yield), M.P = 217-219 °C.  $R_f = 0.3$  (4:1 EtOAc: Hexanes, visualized by 254 nm UV light). **IR (thin film, neat):**  $\nu_{\max}/\text{cm}^{-1}$  2929, 2856, 1710, 1665, 1597, 1511, 1497, 1467, 1361, 1262, 1212, 1171, 1035, 874, 751, 731. **<sup>1</sup>H NMR (500 MHz, CDCl<sub>3</sub>):**  $\delta$  7.57 (dd,  $J = 8.0, 1.2$  Hz, 1H), 7.34-7.27 (m, 2H), 7.16 (s, 1H), 7.11 (ddd,  $J = 8.0, 6.8, 2.2$  Hz, 1H), 7.07 (ddd,  $J = 8.3, 7.3, 1.7$  Hz, 1H), 6.77 (s, 1H), 6.70 (dd,  $J = 8.3, 1.1$  Hz, 1H), 6.60 (td,

$J = 7.4, 1.1$  Hz, 1H), 6.49 (dd,  $J = 7.6, 1.7$  Hz, 1H), 3.97 (s, 3H), 3.96-3.92 (m, 1H), 3.90 (s, 3H), 3.56 (t,  $J = 11.6$  Hz, 1H), 3.21 (dt,  $J = 17.8, 7.0$  Hz, 2H), 2.89 (s, 3H), 2.81 (dd,  $J = 18.7, 2.5$  Hz, 1H), 2.54 (t,  $J = 4.9$  Hz, 1H), 2.16 (s, 3H), 1.70 (s, 2H). **<sup>13</sup>C NMR (125 MHz, CDCl<sub>3</sub>):**  $\delta$  203.92, 153.05, 148.79, 142.72, 142.32, 133.40, 133.19, 132.51, 128.42, 128.21, 128.07, 127.96, 127.01, 126.97, 124.20 118.33, 113.74, 112.50, 110.88, 61.80, 56.22, 56.02, 50.07, 48.63, 42.29 39.23, 36.15, 34.50, 30.67. **HRMS (ESI):** m/z calcd for C<sub>30</sub>H<sub>32</sub>BrNO<sub>4</sub>S (M+H)<sup>+</sup> 580.1157 found: 580.1174.



**3-(3-Fluorophenyl)-7,8-dimethoxy-1-methyl-2-((methylsulfinyl)methyl)-2,2a,3,4-tetrahydro-1H-benzo[6',7']cyclohepta[1',2':2,3]cyclopropa[1,2-c]quinolin-5(2bH)-one (5g).**

This compound was isolated as an off-white solid by following the general procedure-7. 110

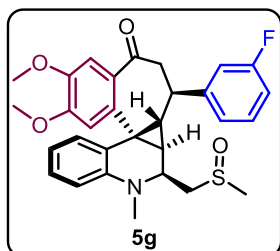

mg of **4g** afforded 72 mg of **5g** (70% yield), M.P = 242-245 °C.  $R_f$  = 0.3 (8:2 EtOAc: Hexanes, visualized by 254 nm UV light). **IR (thin film, neat):**  $\nu_{\max}/\text{cm}^{-1}$  3004, 2960, 2932, 2915, 2837, 1667, 1598, 1512, 1463, 1362, 1260, 1212, 1176, 1052, 1035, 750.  **$^1\text{H}$  NMR (500 MHz,  $\text{CDCl}_3$ ):**  $\delta$  7.30 (td,  $J$  = 7.9, 5.9 Hz, 1H), 7.13 (s, 1H), 7.07 (ddd,  $J$  = 8.3, 7.3, 1.7 Hz, 1H), 7.00 (dt,  $J$  = 7.7, 1.3 Hz, 1H), 6.98-6.90 (m, 2H), 6.77 (s, 1H), 6.70 (dd,  $J$  = 8.4, 1.1 Hz, 1H), 6.60 (td,  $J$

= 7.4, 1.1 Hz, 1H), 6.48 (dd,  $J$  = 7.7, 1.7 Hz, 1H), 3.96 (s, 3H), 3.95-3.92 (m, 1H), 3.89 (s, 3H), 3.28-3.18 (m, 2H), 2.88 (s, 3H), 2.86-2.82 (m, 1H), 2.44 (dd,  $J$  = 5.2, 4.3 Hz, 1H), 2.20 (s, 3H), 2.07 (dd,  $J$  = 12.3, 10.7 Hz, 1H), 1.82-1.75 (m, 2H).  **$^{13}\text{C}$  NMR (125 MHz,  $\text{CDCl}_3$ ):**  $\delta$  203.87, 162.95 (d,  $J_{\text{C-F}}$  = 245.8 Hz), 153.09, 148.88, 145.67 (d,  $J_{\text{C-F}}$  = 6.7 Hz), 142.73, 133.26, 132.61, 130.50 (d,  $J_{\text{C-F}}$  = 8.2 Hz), 127.81, 127.03, 126.86, 122.91 (d,  $J_{\text{C-F}}$  = 2.8 Hz), 118.37, 114.32 (d,  $J_{\text{C-F}}$  = 21.1 Hz), 113.78 (d,  $J_{\text{C-F}}$  = 20.8 Hz), 113.71, 112.53, 110.87, 61.27, 56.26, 56.06, 49.69, 48.69, 44.37, 39.06, 35.95, 35.75, 34.68, 30.85.  **$^{19}\text{F}$  NMR (376 MHz,  $\text{CDCl}_3$ ):**  $\delta$  -111.86. **HRMS (ESI):**  $m/z$  calcd for  $\text{C}_{30}\text{H}_{31}\text{FNO}_4\text{S}$  ( $\text{M}+\text{H}^+$ ) 520.1958 found: 520.1971.

**(7,8-dimethoxy-3-(4-methoxyphenyl)-1-methyl-2-((methylsulfinyl)methyl)-2,2a,3,4-tetrahydro-1H-benzo[6',7']cyclohepta[1',2':2,3]cyclopropa[1,2-c]quinolin-5(2bH)-one (5h).**

This compound was isolated as an off-white solid by following the general procedure-7. 100

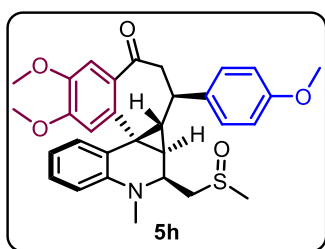

mg of **4h** afforded 72 mg of **5h** (77% yield), M.P = 242-244 °C.  $R_f$  = 0.2 (10:0 EtOAc: Hexanes, visualized by 254 nm UV light). **IR (thin film, neat):**  $\nu_{\max}/\text{cm}^{-1}$  2927, 2850, 1664, 1596, 1505, 1448, 1362, 1211, 1146, 1018, 743.  **$^1\text{H}$  NMR (500 MHz,  $\text{CDCl}_3$ ):**  $\delta$  7.11 (dd,  $J$  = 7.0, 1.7 Hz, 3H), 7.06 (ddd,  $J$  = 8.2, 7.2, 1.7 Hz, 1H), 6.88-6.81 (m, 2H), 6.76 (s, 1H), 6.69 (dd,  $J$  = 8.4, 1.1 Hz, 1H), 6.59 (td,  $J$  = 7.4, 1.1 Hz, 1H), 6.48 (dd,  $J$  = 7.6, 1.7

Hz, 1H), 3.96 (s, 3H), 3.92 (ddd,  $J$  = 10.9, 4.4, 2.8 Hz, 1H), 3.89 (s, 3H), 3.78 (s, 3H), 3.26-3.14 (m, 2H), 2.87 (s, 3H), 2.84-2.74 (m, 2H), 2.39 (dd,  $J$  = 5.3, 4.4 Hz, 1H), 2.13 (s, 3H), 2.08 (dd,  $J$  = 12.2, 10.7 Hz, 1H), 1.77 (dd,  $J$  = 10.6, 5.3 Hz, 1H).  **$^{13}\text{C}$  NMR (125 MHz,  $\text{CDCl}_3$ ):**  $\delta$  204.67, 158.64, 152.95, 148.79, 142.67, 135.04, 133.37, 132.90, 128.28 (2C), 127.77, 126.96, 126.90, 118.21, 114.21 (2C), 113.69, 112.37, 110.82, 61.61, 56.23, 56.04, 55.38, 49.71, 49.36, 43.87, 39.18, 36.22, 36.01, 34.57, 30.99. **HRMS (ESI):**  $m/z$  calcd for  $\text{C}_{31}\text{H}_{34}\text{NO}_5\text{S}$  ( $\text{M}+\text{H}^+$ ) 532.2158 found: 532.2172.

**1,9-Dimethyl-2-((methylsulfinyl)methyl)-3-phenyl-1,2,2a,2b,3,4-hexahydro-5H-benzo[6',7']cyclohepta[1',2':2,3]cyclopropa[1,2-c]quinolin-5-one (5i).**

This compound was isolated as pale-yellow oil by following the general procedure-7. 75 mg

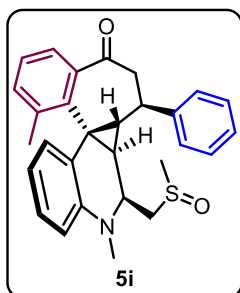

of **4i** afforded 49 mg of **5i** (71% yield)  $R_f = 0.3$  (4:1 EtOAc: Hexanes, visualized by 254 nm UV light). **IR (thin film, neat):**  $\nu_{\max}/\text{cm}^{-1}$  2960, 2927, 1676, 1598, 1493, 1270, 1220, 1041, 764.  **$^1\text{H}$  NMR (500 MHz,  $\text{CDCl}_3$ ):**  $\delta$  7.40-7.34 (m, 2H), 7.31 (ddd,  $J = 7.6, 6.3, 1.8$  Hz, 3H), 7.25 (d,  $J = 7.8$  Hz, 1H), 7.22-7.19 (m, 2H), 7.05 (ddd,  $J = 8.3, 7.2, 1.8$  Hz, 1H), 6.67 (dd,  $J = 8.3, 1.1$  Hz, 1H), 6.56 (td,  $J = 7.4, 1.1$  Hz, 1H), 6.51 (dd,  $J = 7.7, 1.8$  Hz, 1H), 3.96 (ddd,  $J = 10.9, 4.5, 2.6$  Hz, 1H), 3.22-3.13 (m, 2H), 2.87 (s, 3H), 2.84-2.80 (m, 1H), 2.80-2.76 (m, 1H), 2.22 (dd,  $J = 5.4, 4.5$  Hz, 1H), 2.18 (s, 3H), 2.08-2.01 (m, 4H), 1.84 (dd,  $J = 10.8, 5.3$  Hz, 1H).  **$^{13}\text{C}$  NMR (125 MHz,  $\text{CDCl}_3$ ):**  $\delta$  207.08, 142.77, 142.66, 142.18, 139.27, 136.08, 134.27, 128.96 (2C), 128.28, 127.49 (2C), 127.14, 127.11, 127.03, 125.63, 124.90, 118.27, 112.42, 61.42, 49.53, 48.99, 44.72, 39.17, 36.09, 36.03, 34.61, 29.71, 20.37. **HRMS (ESI):**  $m/z$  calcd for  $\text{C}_{29}\text{H}_{30}\text{NO}_2\text{S}$  ( $\text{M}+\text{H}$ )<sup>+</sup> 456.1997 found: 456.1972.

### 5-Methyl-6-((methylsulfinyl)methyl)-7-phenyl-6,6a,7,8-tetrahydro-5H naphtho[2'',1'':6',7']cyclohepta[1',2':2,3]cyclopropa[1,2-c]quinolin-9(6bH)-one (**5j**).

This compound was isolated as a pale-yellow solid by following the general procedure-7.

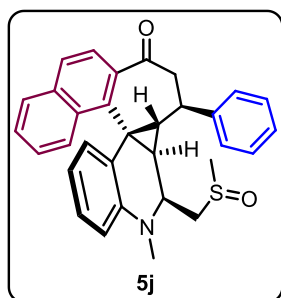

85mg of **4j** afforded 53 mg of **5j** (68% yield), M.P = 240-243 °C.  $R_f = 0.4$  (4:1 EtOAc: Hexanes, visualized by 254 nm UV light). **IR (thin film, neat):**  $\nu_{\max}/\text{cm}^{-1}$  2927, 2853, 1709, 1676, 1597, 1495, 1453, 1398, 1274, 1044, 1029, 815, 762, 701.  **$^1\text{H}$  NMR (500 MHz,  $\text{CDCl}_3$ ):**  $\delta$  8.07 (dd,  $J = 8.5, 1.1$  Hz, 1H), 7.95 (dd,  $J = 8.6, 0.8$  Hz, 1H), 7.90- 7.88 (m, 1H), 7.54-7.51 (m, 2H), 7.48 (ddd,  $J = 8.3, 6.8, 1.4$  Hz, 1H), 7.32-7.29 (m, 2H), 7.26-7.24 (m, 1H), 7.20-7.18 (m, 2H), 7.03 (ddd,  $J = 8.3, 7.3, 1.7$  Hz, 1H), 6.72 (dd,  $J = 8.3, 1.2$  Hz, 1H), 6.56 (dd,  $J = 7.7, 1.7$  Hz, 1H), 6.48 (td,  $J = 7.4, 1.1$  Hz, 1H), 4.26-4.22 (m, 1H), 3.32-3.26 (m, 1H), 3.18 (dd,  $J = 12.4, 2.6$  Hz, 1H), 2.99 (s, 3H), 2.94 (dd,  $J = 18.5, 3.5$  Hz, 1H), 2.85 (ddd,  $J = 13.0, 10.8, 3.5$  Hz, 1H), 2.43 (t,  $J = 5.2$  Hz, 1H), 2.15-2.10 (m, 1H), 1.99 (s, 3H), 1.91 (dd,  $J = 10.8, 5.5$  Hz, 1H).  **$^{13}\text{C}$  NMR (125 MHz,  $\text{CDCl}_3$ ):**  $\delta$  207.37, 142.46, 142.23, 138.83, 135.59, 134.78, 131.79, 129.22, 129.02 (2C), 128.78, 127.69, 127.52 (2C), 127.43, 127.39, 127.22, 127.19, 126.10, 125.68, 124.42, 118.27, 112.60, 61.26, 50.10, 49.13, 44.78, 39.17, 36.35, 36.20, 34.34, 28.96. **HRMS (ESI):**  $m/z$  calcd for  $\text{C}_{32}\text{H}_{30}\text{NO}_2\text{S}$  ( $\text{M}+\text{H}$ )<sup>+</sup> 492.1997 found: 492.1982.

### 7-(3,5-Dimethoxyphenyl)-5-methyl-6-((methylsulfinyl)methyl)-5,6,6a,6b,7,8-hexahydro-9H-naphtho[2'',1'':6',7']cyclohepta[1',2':2,3]cyclopropa[1,2-c]quinolin-9-one (**5k**).

This compound was isolated as a pale-yellow oil by following the general procedure-7. 80

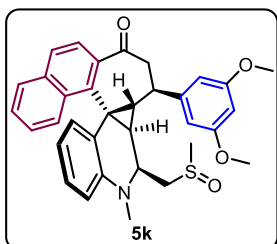

mg of **4k** afforded 49 mg of **5k** (65% yield), M.P = 240-243 °C.  $R_f = 0.2$  (9:1 EtOAc: Hexanes, visualized by 254 nm UV light). **IR (thin film, neat):**  $\nu_{\max}/\text{cm}^{-1}$  2927, 2854, 1666, 1595, 1504, 1447, 1360, 1218, 1140, 1011, 760.  **$^1\text{H}$  NMR (400 MHz,  $\text{CDCl}_3$ ):**  $\delta$  8.08 (dd,  $J = 8.5, 1.2$  Hz, 1H), 7.97 (dd,  $J = 8.5, 4.1$  Hz, 1H), 7.94-7.90 (m, 1H),

7.59-7.54 (m, 1H), 7.52-7.47 (m, 2H), 7.06 (ddd,  $J = 8.6, 7.2, 1.8$  Hz, 1H), 6.75 (dd,  $J = 8.4, 1.1$  Hz, 1H), 6.56 (dd,  $J = 7.6, 1.7$  Hz, 1H), 6.53-6.46 (m, 1H), 6.35 (s, 3H), 4.28 (ddd,  $J = 11.0, 4.9, 2.5$  Hz, 1H), 3.76 (s, 6H), 3.38-3.20 (m, 2H), 3.02 (s, 3H), 2.97 (dd,  $J = 18.5, 3.5$  Hz, 1H), 2.82 (ddd,  $J = 13.0, 10.7, 3.5$  Hz, 1H), 2.46 (t,  $J = 5.1$  Hz, 1H), 2.25 (dd,  $J = 12.4, 10.8$  Hz, 1H), 2.18 (s, 3H), 1.91 (dd,  $J = 10.8, 5.5$  Hz, 1H).  $^{13}\text{C}$  NMR (100 MHz,  $\text{CDCl}_3$ ):  $\delta$  207.33, 161.18 (2C), 144.79, 142.26, 138.80, 135.58, 134.75, 131.76, 129.24, 128.79, 127.74, 127.43, 127.36, 127.20, 126.10, 125.60, 124.45, 118.23, 112.60, 105.28 (2C), 98.90, 61.46, 55.40, 55.36, 50.00, 48.64, 44.97, 38.97, 36.36, 36.19, 29.72, 28.89. HRMS (ESI):  $m/z$  calcd for  $\text{C}_{34}\text{H}_{34}\text{NO}_4\text{S}$  ( $\text{M}+\text{H}$ ) $^+$  552.2209 found: 552.2200.

**1,4-Dimethyl-2-((methylsulfinyl)methyl)-3-phenyl-1,2,2a,2b,3,4-hexahydro-5H-benzo[6',7']cyclohepta[1',2':2,3]cyclopropa[1,2-c]quinolin-5-one (5l).**

This compound was isolated as a dark brownish-red semi-solid by following the general procedure-7. 75 mg of **4l** afforded 52 mg of **5l** (75% yield), M.P = 212-214 °C.  $R_f = 0.4$  (9:1 EtOAc: Hexanes, visualized by 254 nm UV light).

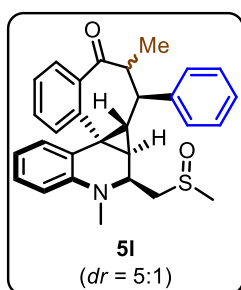

**IR (thin film, neat):**  $\nu_{\text{max}}/\text{cm}^{-1}$  2955, 2928, 1677, 1594, 1495, 1430, 1202, 1152, 1053, 835, 735.  $^1\text{H}$  NMR (400 MHz,  $\text{CDCl}_3$ ):  $\delta$  7.56 (td,  $J = 7.6, 1.5$  Hz, 1H), 7.47 (td,  $J = 7.5, 1.4$  Hz, 1H), 7.40 (dd,  $J = 7.7, 1.2$  Hz, 1H), 7.38-7.31 (m, 3H), 7.26 (d,  $J = 7.4$  Hz, 1H), 7.20-7.14 (m, 2H), 7.07 (dd,  $J = 8.7, 1.7$  Hz, 1H), 6.70 (dd,  $J = 8.4, 1.1$  Hz, 1H), 6.62 (td,  $J = 7.5, 1.1$  Hz, 1H), 6.51 (dd,  $J = 7.7, 1.7$  Hz, 1H), 3.89-3.85 (m, 1H),

3.16 (dd,  $J = 12.3, 2.6$  Hz, 1H), 3.08-3.03 (m, 1H), 2.87 (d,  $J = 9.2$  Hz, 3H), 2.38 – 2.23 (m, 2H), 1.99 (s, 3H), 1.91-1.84 (m, 1H), 1.78 (s, 1H), 0.94 (d,  $J = 7.2$  Hz, 3H).  $^{13}\text{C}$  NMR (100 MHz,  $\text{CDCl}_3$ ):  $\delta$  211.71, 142.74, 141.71, 141.04, 138.60, 131.84, 131.24, 128.96 (2C), 128.20, 128.09, 127.87, 127.16, 127.08, 126.99, 126.96, 118.32, 112.41, 61.56, 52.76, 51.59, 49.54, 39.20, 35.91, 34.48, 34.14, 31.62, 17.90. HRMS (ESI):  $m/z$  calcd for  $\text{C}_{29}\text{H}_{30}\text{NO}_2\text{S}$  ( $\text{M}+\text{H}$ ) $^+$  456.1997 found: 456.2000.

**1-Butyl-3-(3,5-dimethoxyphenyl)-2-((methylsulfinyl)methyl)-2,2a,3,4-tetrahydro-1H-benzo[6',7']cyclohepta[1',2':2,3]cyclopropa[1,2-c]quinolin-5(2bH)-one (5m).**

This compound was isolated as a yellowish-green solid by following the general procedure-7.

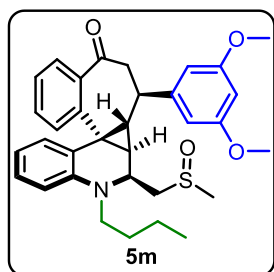

70 mg of **4m** afforded 47 mg of **5m** (72% yield), M.P = 212-214 °C.  $R_f = 0.2$  (9:1 EtOAc: Hexanes, visualized by 254 nm UV light). **IR** (thin film, neat):  $\nu_{\text{max}}/\text{cm}^{-1}$  2955, 2928, 1677, 1594, 1495, 1430,

1202, 1152, 1053, 835, 735.  $^1\text{H}$  NMR (400 MHz,  $\text{CDCl}_3$ ):  $\delta$  7.59-7.51 (m, 2H), 7.47 (ddd,  $J = 8.1, 7.2, 1.3$  Hz, 1H), 7.40 (dd,  $J = 8.2, 1.2$  Hz, 1H), 7.05 (ddd,  $J = 8.6, 7.2, 1.8$  Hz, 1H), 6.66 (dd,  $J = 8.5, 1.0$  Hz, 1H), 6.56 (td,  $J = 7.4, 1.0$  Hz, 1H), 6.46 (dd,  $J = 7.6, 1.7$  Hz, 1H),

6.35 (s, 3H), 4.08 (ddd,  $J = 11.0, 4.4, 2.6$  Hz, 1H), 3.77 (d,  $J = 8.4$  Hz, 7H), 3.36 (ddd,  $J = 15.9, 11.0, 5.0$  Hz, 1H), 3.29-3.12 (m, 3H), 2.98–2.90 (m, 1H), 2.87 (dd,  $J = 18.7, 3.0$  Hz, 1H), 2.74 (ddd,  $J = 13.3, 10.6, 3.1$  Hz, 1H), 2.42 (t,  $J = 4.8$  Hz, 1H), 2.22 (s, 3H), 2.17-2.08 (m, 1H), 1.78 (dd,  $J = 10.7, 5.2$  Hz, 1H), 1.39 (q,  $J = 7.5$  Hz, 2H), 0.99 (t,  $J = 7.3$  Hz, 3H).  $^{13}\text{C}$  NMR (100 MHz,  $\text{CDCl}_3$ ):  $\delta$  205.94, 161.12 (2C), 145.14, 141.50, 140.76, 139.52,

132.76, 132.12, 128.26, 128.18, 128.08, 126.95, 126.43, 117.74, 112.56, 105.23 (2C), 98.76, 61.65, 55.39, 55.36, 48.50, 48.13, 47.72, 44.95, 39.31, 35.19, 34.83, 30.78, 28.40, 20.24, 13.97. **HRMS (ESI):**  $m/z$  calcd for  $C_{33}H_{38}NO_4S$  ( $M+H$ )<sup>+</sup> 544.2522 found: 544.2527.

### 12-Chloro-1-methyl-2-((methylsulfinyl)methyl)-3-phenyl-1,2,2a,2b,3,4-hexahydro-5H-benzo[6',7']cyclohepta[1',2':2,3]cyclopropa[1,2-c]quinolin-5-one (5o).

This compound was isolated as pale-yellow oil by following the general procedure-7. 50 mg

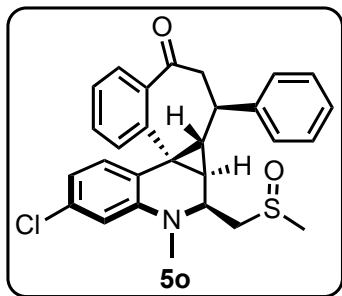

of **7o** afforded 28 mg of **5o** (60% yield),  $R_f = 0.2$  (4:1 EtOAc: Hexanes, visualized by 254 nm UV light). **IR (thin film, neat):**  $\nu_{max}/cm^{-1}$  2924, 2855, 1675, 1594, 1494, 1456, 1401, 1284, 1212, 1109, 1045, 1025, 878, 763. **<sup>1</sup>H NMR (400 MHz, CDCl<sub>3</sub>):**  $\delta$  7.57-7.51 (m, 2H), 7.48-7.44 (m, 1H), 7.36-7.29 (m, 3H), 7.24-7.18 (m, 3H), 6.63 (d,  $J = 1.9$  Hz, 1H), 6.53 (dd,  $J = 8.2, 2.0$  Hz, 1H), 6.35 (d,  $J = 8.2$  Hz, 1H), 3.96-3.91 (m, 1H), 3.25-3.13 (m, 2H), 2.87-2.76 (m, 5H), 2.38 (t,  $J = 4.9$  Hz, 1H),

2.04 (s, 3H), 1.99 (d,  $J = 11.9$ , Hz, 1H), 1.75 (dd,  $J = 10.7, 5.2$  Hz, 1H). **<sup>13</sup>C NMR (100 MHz, CDCl<sub>3</sub>):**  $\delta$  206.00, 143.65, 142.47, 140.82, 138.77, 132.79, 132.68, 131.87, 128.99 (2C), 128.89, 128.44, 128.04, 127.38 (2C), 127.23, 124.93, 117.92, 112.50, 61.97, 49.75, 48.89, 44.70, 39.11, 35.99, 35.49, 34.23, 30.71. **HRMS (ESI):**  $m/z$  calcd for  $C_{28}H_{27}ClNO_2S$  ( $M+H$ )<sup>+</sup> 476.1451 found 476.1446.

### 11,12-Dimethoxy-1-methyl-2-((methylsulfinyl)methyl)-3-phenyl-1,2,2a,2b,3,4-hexahydro-5H-benzo[6',7']cyclohepta[1',2':2,3]cyclopropa[1,2-c]quinolin-5-one (5p).

This compound was isolated as yellowish-brown oil by following the general procedure-7. 50

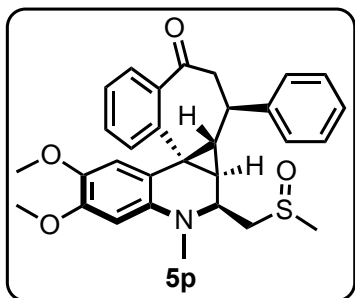

mg of **7p** afforded 34 mg of **5p** (73% yield),  $R_f = 0.1$  (10:1 EtOAc: Hexanes, visualized by 254 nm UV light). **IR (thin film, neat):**  $\nu_{max}/cm^{-1}$  3056, 2926, 2852, 1679, 1597, 1515, 1455, 1396, 1221, 1026, 765, 735, 701. **<sup>1</sup>H NMR (400 MHz, CDCl<sub>3</sub>):**  $\delta$  7.56-7.49 (m, 2H), 7.46-7.42 (m, 1H), 7.39 (d,  $J = 7.7$  Hz, 1H), 7.30 (t,  $J = 7.0$  Hz, 2H), 7.23-7.18 (m, 3H), 6.29 (s, 1H), 6.02 (s, 1H), 3.86-3.81 (m, 4H), 3.52 (s, 3H), 3.22 (dd,  $J = 18.6, 12.0$  Hz, 1H), 3.15 (dd,  $J = 14.6, 11.9$  Hz, 1H), 2.89-

2.82 (m, 4H), 2.74 (dd,  $J = 10.9, 3.0$  Hz, 1H), 2.34 (t,  $J = 4.8$  Hz, 1H), 2.05 (s, 3H), 2.03-1.96 (m, 1H), 1.75 (dd,  $J = 10.0, 5.0$  Hz, 1H). **<sup>13</sup>C NMR (100 MHz, CDCl<sub>3</sub>):**  $\delta$  206.24, 147.88, 142.67, 141.60, 140.85, 139.30, 137.07, 132.60, 131.95, 128.92 (2C), 128.21, 127.80, 127.38 (2C), 127.11, 118.60, 112.48, 98.73, 61.03, 56.42, 56.13, 50.29, 49.00, 44.70, 39.15, 36.39, 35.39, 34.30, 30.55. **HRMS (ESI):**  $m/z$  calcd for  $C_{30}H_{32}NO_4S$  ( $M+H$ )<sup>+</sup> 502.2052 found 502.2051.

### General Procedure-8: One-pot synthesis of pyridinium salts and spirannulation

**In DMF:** In a sealed tube, biaryl enone **6a** (0.09 g, 0.31 mmol) or **6b** (0.084 g, 0.24 mmol) was dissolved in DMF (2 mL). Then, methyl iodide (1.2 eq.) was added in one portion and the reaction mixture was stirred at 70 °C for 3-6 h, and monitored the reaction on TLC. After complete consumption of the starting material, the reaction mixture was added to a suspension of sodium hydride (60% in oil, 1.2 eq.) and TMSOI (1.1 eq.) in a dry DMF (2.0 mL) under an N<sub>2</sub> atmosphere. The reaction mixture was stirred at room temperature until the salt disappeared (by TLC). Then, quenched the reaction mixture using ice water, and extracted with diethyl ether. The organic extracts were combined, dried over anhydrous sodium sulfate, and concentrated. The crude product was purified by silica gel column chromatography using hexane/ethyl acetate to afford **3a** in 28% and **3b** in 57% yield.

**In DCM:** In a sealed tube, biaryl enone **6a** (0.09 g, 0.31 mmol) or **6b** (0.084 g, 0.24 mmol) or **7f** (0.12 g, 0.85 mmol) or **7m** (0.11 g, 0.27 mmol) was dissolved in DCM (3.0 mL). Then, alkyl iodide was added in one portion; the reaction mixture was stirred at 70 °C for 3-6 h, and monitored the reaction on TLC. After complete consumption of the starting material, the solvent was evaporated and added to a suspension of sodium hydride (60% in oil, 1.2 eq.) and TMSOI (1.1 eq.) in dry DMF (2.0 mL) was added under N<sub>2</sub> atmosphere. The reaction mixture was stirred at room temperature until the salt disappeared (as monitored by TLC). Then, quenched the reaction mixture using ice water, and extracted with diethyl ether. The organic extracts were combined, dried over anhydrous sodium sulfate, and concentrated. The crude product was purified by silica gel column chromatography using hexane/ethyl acetate to afford **6** or **7**.

### General Procedure-9: Reaction of **2a** with trideuteromethyl sulfoxonium iodide (TMSOI)

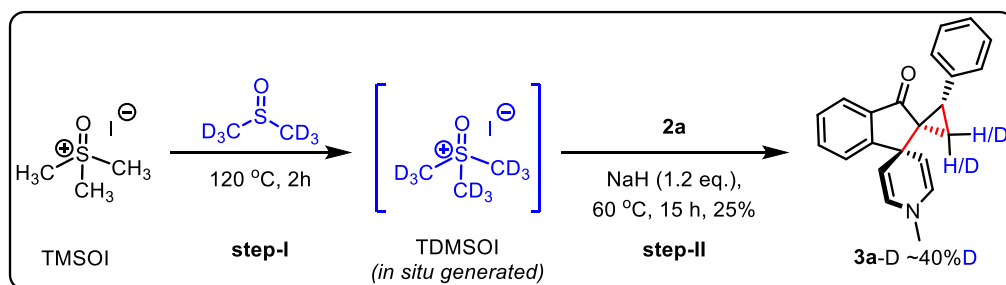

**Scheme S8:** Reaction of **2a** with TMSOI

To a sealed reaction tube, TMSOI (0.18 g, 0.82 mmol) and DMSO-*d*<sub>6</sub> (40.0 eq.) were added and stirred at 120 °C for 2 h. The reaction mixture was cooled to room temperature and a suspension of sodium hydride (60% in oil, 36 mg, 0.9 mmol) in dry DMF (1.0 mL), **2a** (0.21 g, 0.75 mmol) were added drop wise over a period of 5-10 min and stirred at 60 °C for 15 h. The reaction mixture was quenched using ice water and extracted with diethyl ether. The organic extracts were combined, dried over anhydrous sodium sulfate, and concentrated. The crude product was purified by silica gel column chromatography using hexane/ethyl acetate. The level of deuterium incorporation in bis-spiro indanone product **3a-D** was determined by <sup>1</sup>H-NMR spectroscopy. The metathesis reaction between DMSO-*d*<sub>6</sub> and TMSOI yielded the bis-spiro indanone **3a-D** with 40% deuterium incorporation.

## <sup>1</sup>H NMR (400 MHz, CDCl<sub>3</sub>) for 3a-D

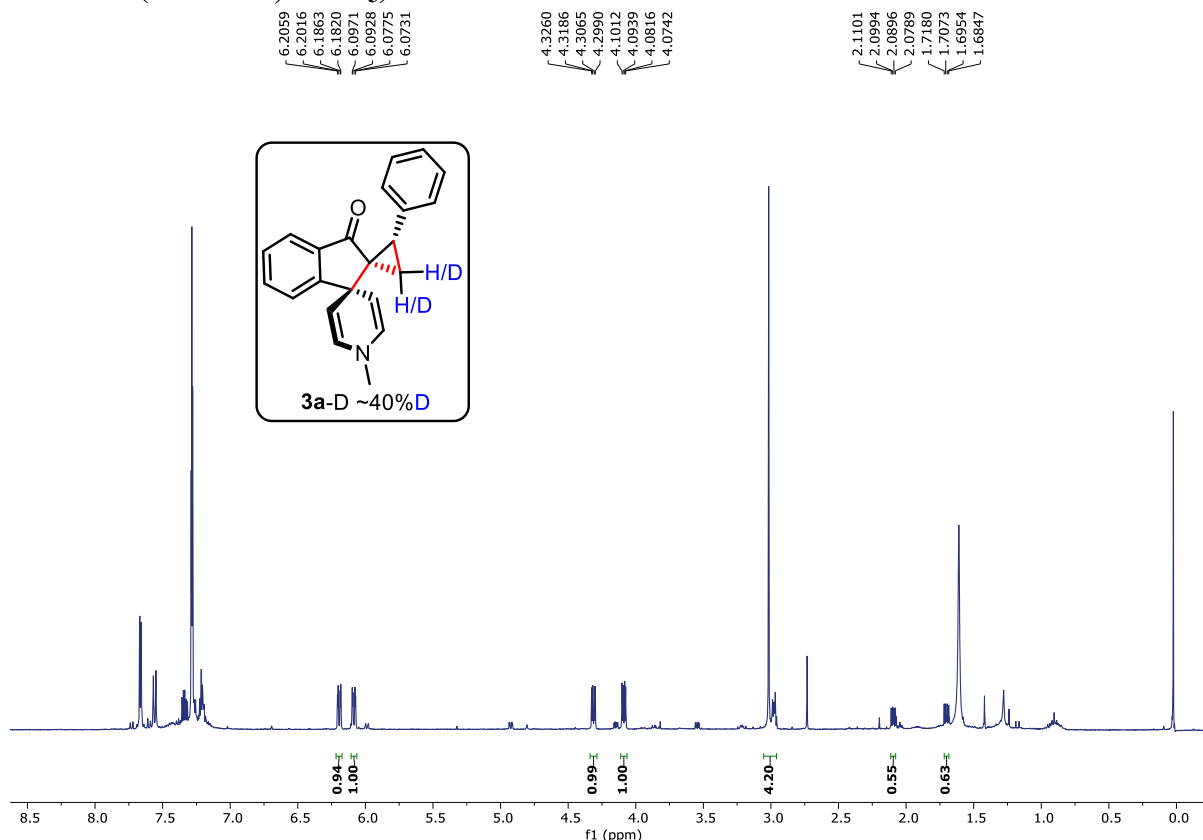

### General procedure-10: To study the role of the pyridinium portion

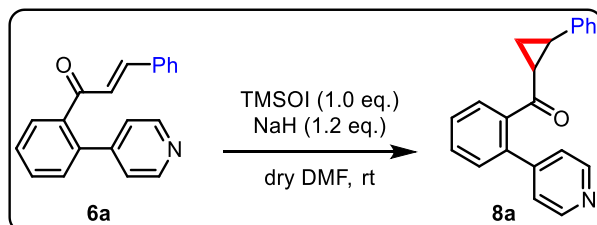

Scheme S9: Reaction of **6a** with TMSOI.

A mixture of sodium hydride (60% in oil, 16 mg, 0.42 mmol) and TMSOI (85 mg, 0.23 mmol) was placed in an oven-dried flask, and dry DMF (4.0 mL) was added to the mixture. After the evolution of hydrogen ceased and the milky solution turned clear, the reaction mixture was stirred for 15 min. The compound **6a** (100 mg, 0.35 mmol) dissolved in dry DMF (1.0 mL) was added over a period of 5-10 min and stirred at room temperature until the reactant **6a** disappeared as monitored by TLC. The reaction mixture was quenched using ice water and extracted with diethyl ether. The organic extracts were combined, dried over anhydrous sodium sulfate, and concentrated. The crude product was purified by silica gel column chromatography using hexane/ethyl acetate.

### (2-Phenylcyclopropyl)(2-(pyridin-4-yl)phenyl)methanone (**8a**).

This compound was isolated as a reddish-brown sticky oil by following the general procedure-10. 100 mg of **6a** afforded 84 mg of **8a** (80% yield),  $R_f = 0.3$  (8:2 EtOAc:



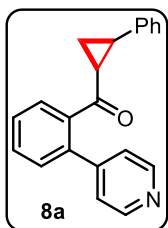

Hexanes, visualized by 254 nm UV light). **IR (thin film, neat):**  $\nu_{\max}/\text{cm}^{-1}$  3052, 2925, 1685, 1598, 1498, 1480, 1288, 1044, 720.  **$^1\text{H}$  NMR (400 MHz,  $\text{CDCl}_3$ )**  $\delta$  8.55 – 8.51 (m, 2H), 7.70 – 7.65 (m, 1H), 7.58 (td,  $J = 7.5, 1.5$  Hz, 1H), 7.52 (td,  $J = 7.5, 1.4$  Hz, 1H), 7.39 (dd,  $J = 7.4, 1.4$  Hz, 1H), 7.28 – 7.24 (m, 2H), 7.24 – 7.18 (m, 3H), 6.88 – 6.82 (m, 2H), 2.59 (ddd,  $J = 9.1, 6.7, 4.0$  Hz, 1H), 2.11 (ddd,  $J = 8.1, 5.2, 4.0$  Hz, 1H), 1.79 (ddd,  $J = 9.2, 5.3, 4.1$  Hz, 1H), 1.32 – 1.23 (m, 1H).  **$^{13}\text{C}$  NMR (100 MHz,  $\text{CDCl}_3$ )**  $\delta$  203.75, 149.74 (2C), 148.33, 140.50, 139.65, 138.04, 131.15, 130.08, 128.73, 128.43 (2C), 128.36, 126.69, 125.65 (2C), 123.75 (2C), 34.42, 31.92, 21.72. **HRMS (ESI):**  $m/z$  calcd for  $\text{C}_{21}\text{H}_{18}\text{NO}$  ( $\text{M}+\text{H}$ )<sup>+</sup> 300.1388 found: 300.1424.

To rule out the reaction goes through the initial formation of **8a** and a subsequent base-mediated cyclization on to the pyridinium moiety, a control experiment has been performed with the salt of **8a**, Scheme 10. However, the formation of only a trace of **3a** was observed under the optimized condition. This pathway was not preferred possibly because of the high strain associated with the intermediate enolate **8a-E**. This result further validates the proposed mechanism in Scheme 8.

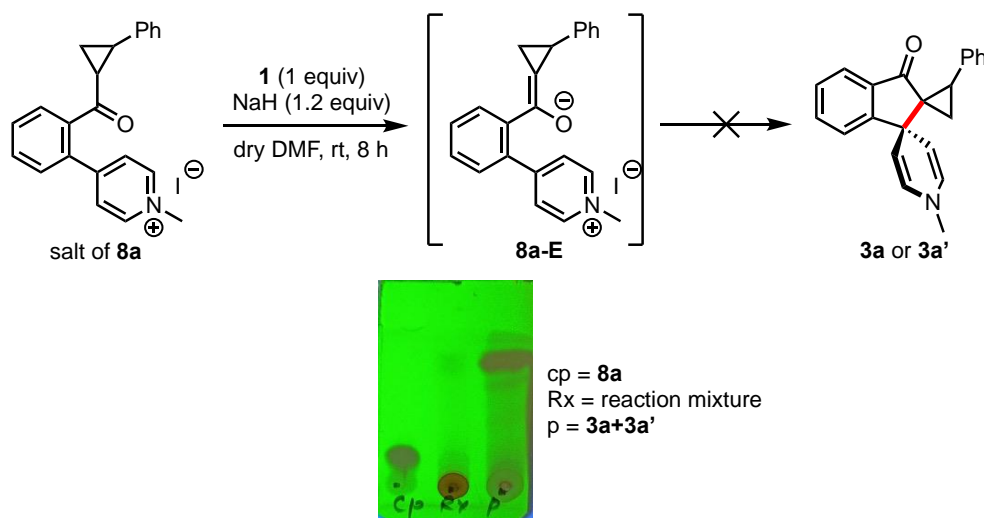

**Scheme S10.** A control experiment to rule out the intermediacy of **8a-E**

**$^1\text{H}$  NMR of the salt of 8a (400 MHz, DMSO- $d_6$ )**

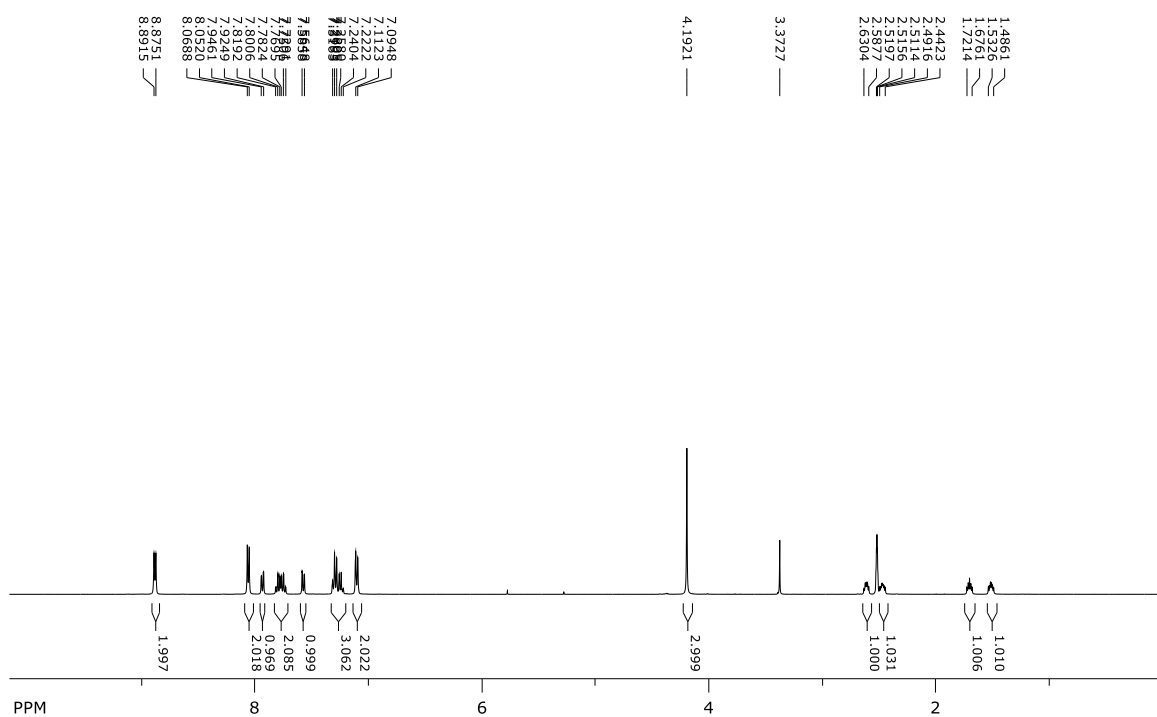

**$^{13}\text{C}$  NMR of the salt of 8a (100 MHz, DMSO- $d_6$ )**

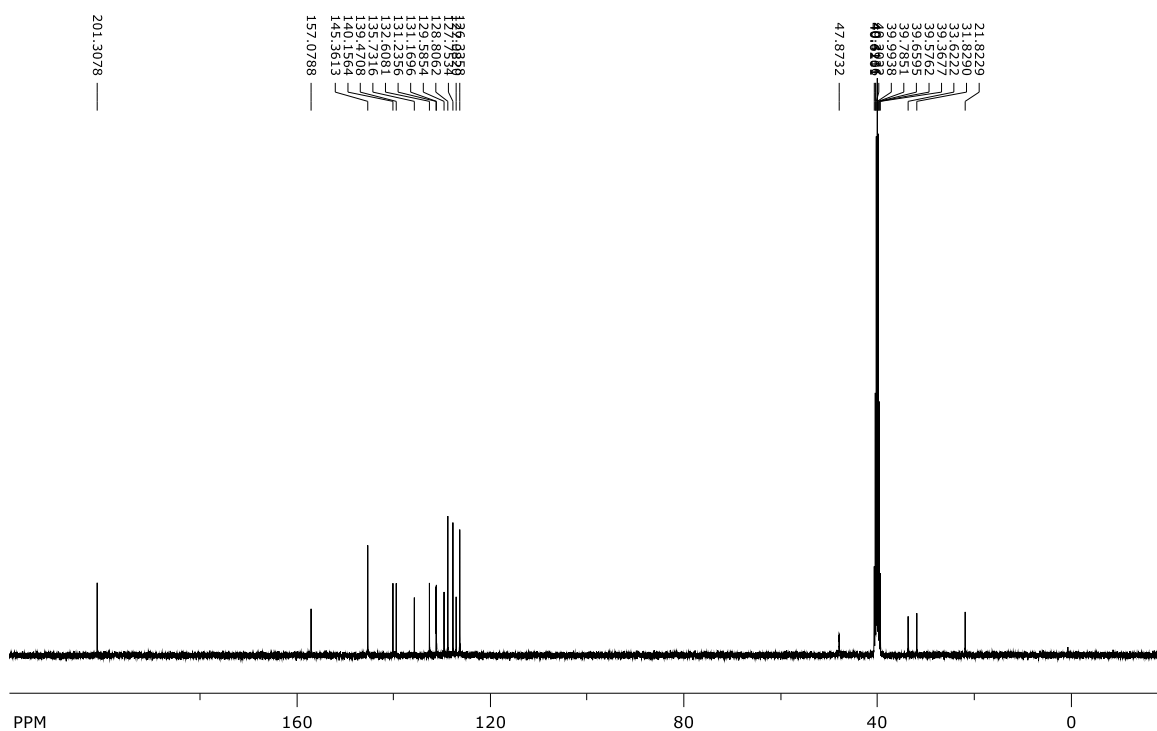

**General procedure-11: To study the role of the enone moiety** (General procedure-6 was followed)

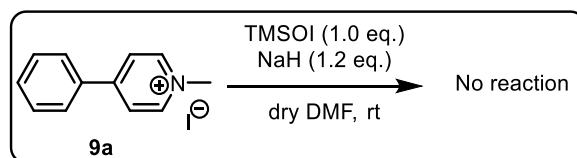

**Scheme S11:** Reaction of **9a** with trimethylsulfoxonium iodide

#### 4-Phenylpyridine (**10**).

This compound was synthesized according to the reported literature.<sup>3</sup>  $R_f = 0.4$  (4:1 EtOAc: Hexanes, visualized by 254 nm UV light.  $^1\text{H NMR}$  (400 MHz,  $\text{CDCl}_3$ ):  $\delta$  8.70 (d,  $J = 5.8$  Hz, 2H), 7.71–7.61 (m, 2H), 7.59–7.40 (m, 5H).  $^{13}\text{C NMR}$  (100 MHz,  $\text{CDCl}_3$ ):  $\delta$  150.11, 148.44, 138.09, 129.15 (3C), 129.12, 127.01 (3C), 121.80.

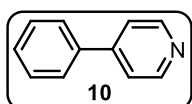

#### General procedure 12: Reaction of **2a** in the presence of proton sponge

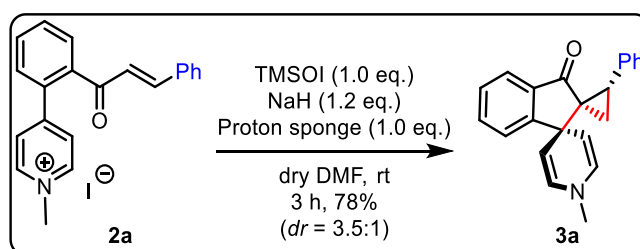

**Scheme S12:** reaction of **2a** in the presence of proton sponge.

A mixture of sodium hydride (60% in oil, 10 mg, 0.25 mmol) and TMSOI (50 mg, 0.23 mmol) was placed in an oven-dried flask, and dry DMF (4.0 mL) was added to the mixture. After the evolution of hydrogen ceased, the reaction mixture was stirred for 15 min. Then, **2a** (0.90 mg, 0.21 mmol) and proton sponge (44 mg, 0.21 mmol) were dissolved in dry DMF (1.0 mL) and were added drop wise over a period of 5-10 min and stirred at room temperature until **2a** disappeared (as monitored by TLC). The reaction mixture was quenched using ice water and extracted with diethyl ether. The organic extracts were combined, dried over anhydrous sodium sulfate, and concentrated. The crude product was purified by silica gel column chromatography using hexane/ethyl acetate.

<sup>3</sup> Feuerstein, M.; Doucet, H.; Santelli, M. Efficient *J. Organomet. Chem.* **2003**, 687, 327–336.

**Crystal Structure of 3a (CCDC 2133525):** The structure of the **3a** was confirmed by single crystal X-ray diffraction analysis.

**Crystal data and structure refinement for 3a (major)**

|                                             |                                                               |
|---------------------------------------------|---------------------------------------------------------------|
| Identification code                         | <b>3a (Major)</b>                                             |
| Empirical formula                           | C <sub>22</sub> H <sub>19</sub> NO                            |
| Formula weight                              | 311.407                                                       |
| Temperature/K                               | 289                                                           |
| Crystal system                              | Monoclinic                                                    |
| Space group                                 | P2 <sub>1</sub> /n                                            |
| a/Å                                         | 10.4984(6)                                                    |
| b/Å                                         | 13.6723(8)                                                    |
| c/Å                                         | 12.6001(8)                                                    |
| α/°                                         | 90                                                            |
| β/°                                         | 108.468(7)                                                    |
| γ/°                                         | 90                                                            |
| Volume/Å <sup>3</sup>                       | 1715.44(19)                                                   |
| Z                                           | 4                                                             |
| ρ <sub>calc</sub> /cm <sup>3</sup>          | 1.206                                                         |
| μ/mm <sup>-1</sup>                          | 0.072                                                         |
| F(000)                                      | 660.3                                                         |
| Crystal size/mm <sup>3</sup>                | 0.3 × 0.2 × 0.2                                               |
| Radiation                                   | Mo Kα (λ = 0.71073)                                           |
| 2θ range for data collection/°              | 5.06 to 65.54                                                 |
| Index ranges                                | -14 ≤ h ≤ 15, -9 ≤ k ≤ 18, -19 ≤ l ≤ 17                       |
| Reflections collected                       | 10342                                                         |
| Independent reflections                     | 5728 [R <sub>int</sub> = 0.0279, R <sub>sigma</sub> = 0.0405] |
| Data/restraints/parameters                  | 5728/0/218                                                    |
| Goodness-of-fit on F <sup>2</sup>           | 1.143                                                         |
| Final R indexes [I ≥ 2σ (I)]                | R <sub>1</sub> = 0.0623, wR <sub>2</sub> = 0.1825             |
| Final R indexes [all data]                  | R <sub>1</sub> = 0.1075, wR <sub>2</sub> = 0.2261             |
| Largest diff. peak/hole / e Å <sup>-3</sup> | 0.28/-0.23                                                    |

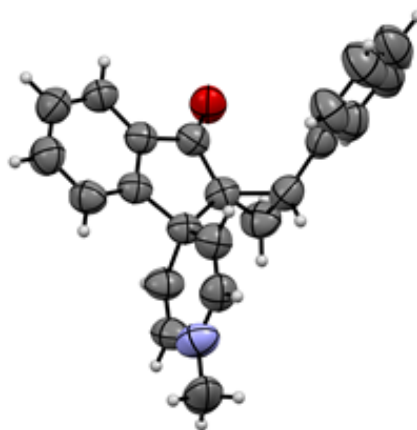

**Crystal Structure of 3a' (CCDC 2133527):** The structure of **3a'** was confirmed by single crystal X-ray diffraction analysis.

**Crystal data and structure refinement for 3a' (minor).**

|                                             |                                                               |
|---------------------------------------------|---------------------------------------------------------------|
| Identification code                         | <b>3a'</b> (minor)                                            |
| Empirical formula                           | C <sub>22</sub> H <sub>19</sub> NO                            |
| Formula weight                              | 313.402                                                       |
| Temperature/K                               | 298                                                           |
| Crystal system                              | monoclinic                                                    |
| Space group                                 | P2 <sub>1</sub> /c                                            |
| a/Å                                         | 8.2759(4)                                                     |
| b/Å                                         | 18.6849(8)                                                    |
| c/Å                                         | 11.6613(6)                                                    |
| α/°                                         | 90                                                            |
| β/°                                         | 106.981(5)                                                    |
| γ/°                                         | 90                                                            |
| Volume/Å <sup>3</sup>                       | 1724.62(15)                                                   |
| Z                                           | 4                                                             |
| ρ <sub>calc</sub> /cm <sup>3</sup>          | 1.207                                                         |
| μ/mm <sup>-1</sup>                          | 0.074                                                         |
| F(000)                                      | 664.3                                                         |
| Crystal size/mm <sup>3</sup>                | 0.6 × 0.3 × 0.2                                               |
| Radiation                                   | Mo Kα (λ = 0.71073)                                           |
| 2θ range for data collection/°              | 6.74 to 65.34                                                 |
| Index ranges                                | -7 ≤ h ≤ 11, -28 ≤ k ≤ 23, -17 ≤ l ≤ 11                       |
| Reflections collected                       | 8796                                                          |
| Independent reflections                     | 5576 [R <sub>int</sub> = 0.0188, R <sub>sigma</sub> = 0.0323] |
| Data/restraints/parameters                  | 5576/0/218                                                    |
| Goodness-of-fit on F <sup>2</sup>           | 1.211                                                         |
| Final R indexes [I >= 2σ (I)]               | R <sub>1</sub> = 0.0577, wR <sub>2</sub> = 0.1745             |
| Final R indexes [all data]                  | R <sub>1</sub> = 0.0778, wR <sub>2</sub> = 0.1994             |
| Largest diff. peak/hole / e Å <sup>-3</sup> | 0.27/-0.19                                                    |

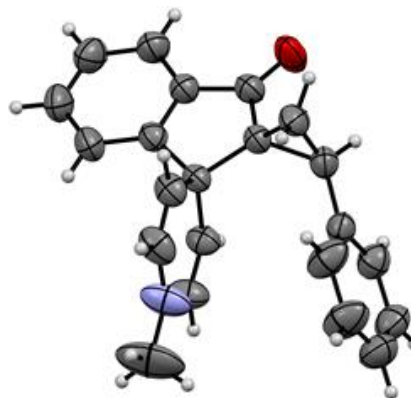

**Crystal Structure of 5a (CCDC 2143316):** The structure of the **5a** was confirmed by single crystal X-ray diffraction analysis.

**Crystal data and structure refinement for 5a.**

|                                             |                                                               |
|---------------------------------------------|---------------------------------------------------------------|
| Identification code                         | <b>5a</b>                                                     |
| Empirical formula                           | C <sub>28</sub> H <sub>27</sub> NO <sub>2</sub> S             |
| Formula weight                              | 441.56                                                        |
| Temperature/K                               | 293(2)                                                        |
| Crystal system                              | triclinic                                                     |
| Space group                                 | P-1                                                           |
| a/Å                                         | 9.0157(3)                                                     |
| b/Å                                         | 11.1293(4)                                                    |
| c/Å                                         | 11.8264(3)                                                    |
| α/°                                         | 88.918(3)                                                     |
| β/°                                         | 87.476(3)                                                     |
| γ/°                                         | 74.544(3)                                                     |
| Volume/Å <sup>3</sup>                       | 1142.58(6)                                                    |
| Z                                           | 2                                                             |
| ρ <sub>calc</sub> /cm <sup>3</sup>          | 1.283                                                         |
| μ/mm <sup>-1</sup>                          | 0.167                                                         |
| F(000)                                      | 468.0                                                         |
| Crystal size/mm <sup>3</sup>                | 0.12 × 0.08 × 0.04                                            |
| Radiation                                   | MoKα (λ = 0.71073)                                            |
| 2θ range for data collection/°              | 6.354 to 54.952                                               |
| Index ranges                                | -11 ≤ h ≤ 10, -14 ≤ k ≤ 14, -14 ≤ l ≤ 15                      |
| Reflections collected                       | 16391                                                         |
| Independent reflections                     | 4891 [R <sub>int</sub> = 0.0484, R <sub>sigma</sub> = 0.0464] |
| Data/restraints/parameters                  | 4891/0/291                                                    |
| Goodness-of-fit on F <sup>2</sup>           | 1.120                                                         |
| Final R indexes [I ≥ 2σ (I)]                | R <sub>1</sub> = 0.0502, wR <sub>2</sub> = 0.1363             |
| Final R indexes [all data]                  | R <sub>1</sub> = 0.0743, wR <sub>2</sub> = 0.1490             |
| Largest diff. peak/hole / e Å <sup>-3</sup> | 0.38/-0.34                                                    |

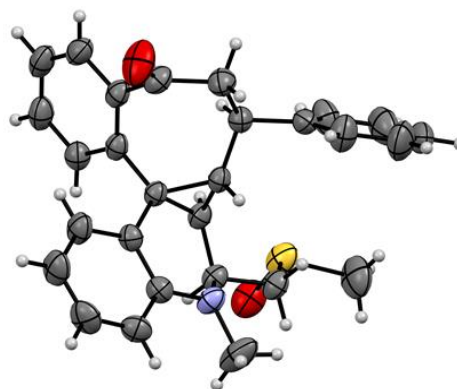



# Copies of $^1\text{H}$ , $^{13}\text{C}$ and $^{19}\text{F}$ NMR spectra of all the new compounds reported in this study

## $^1\text{H}$ NMR (500 MHz, $\text{CDCl}_3$ )

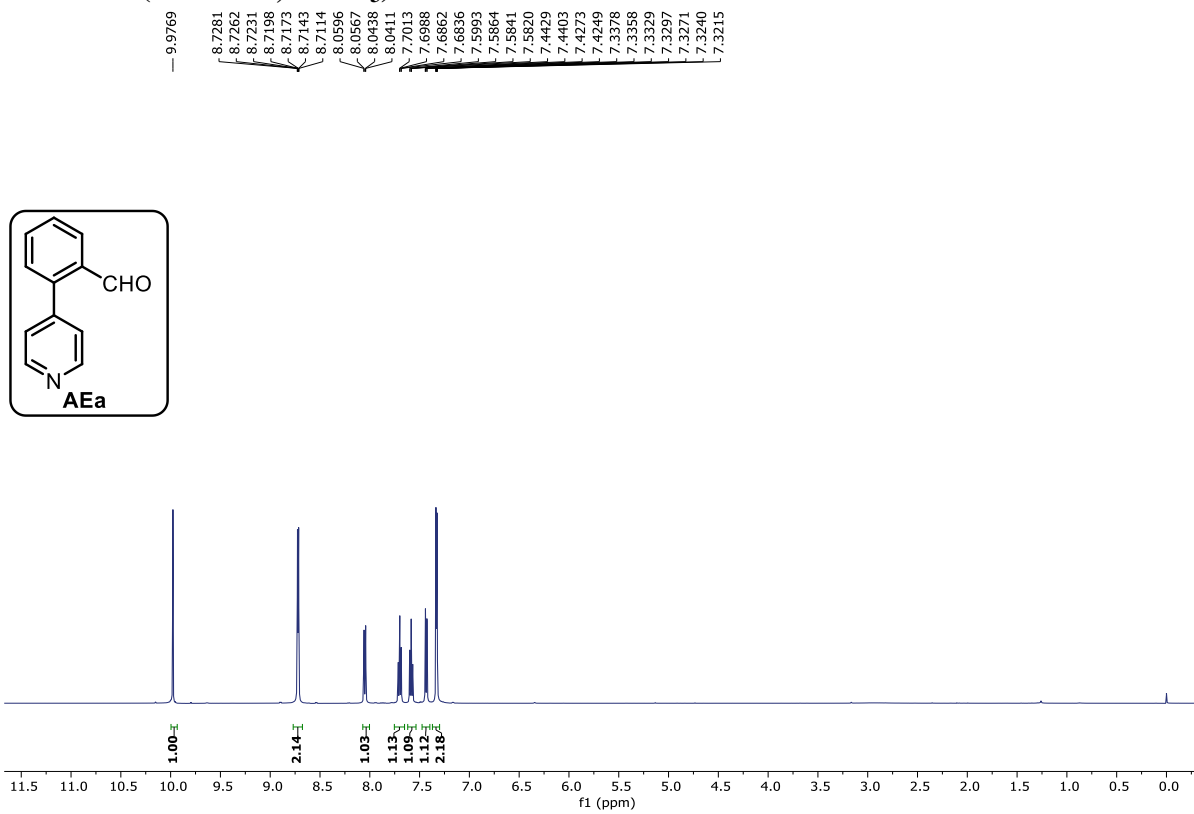

## $^{13}\text{C}$ NMR (125 MHz, $\text{CDCl}_3$ )

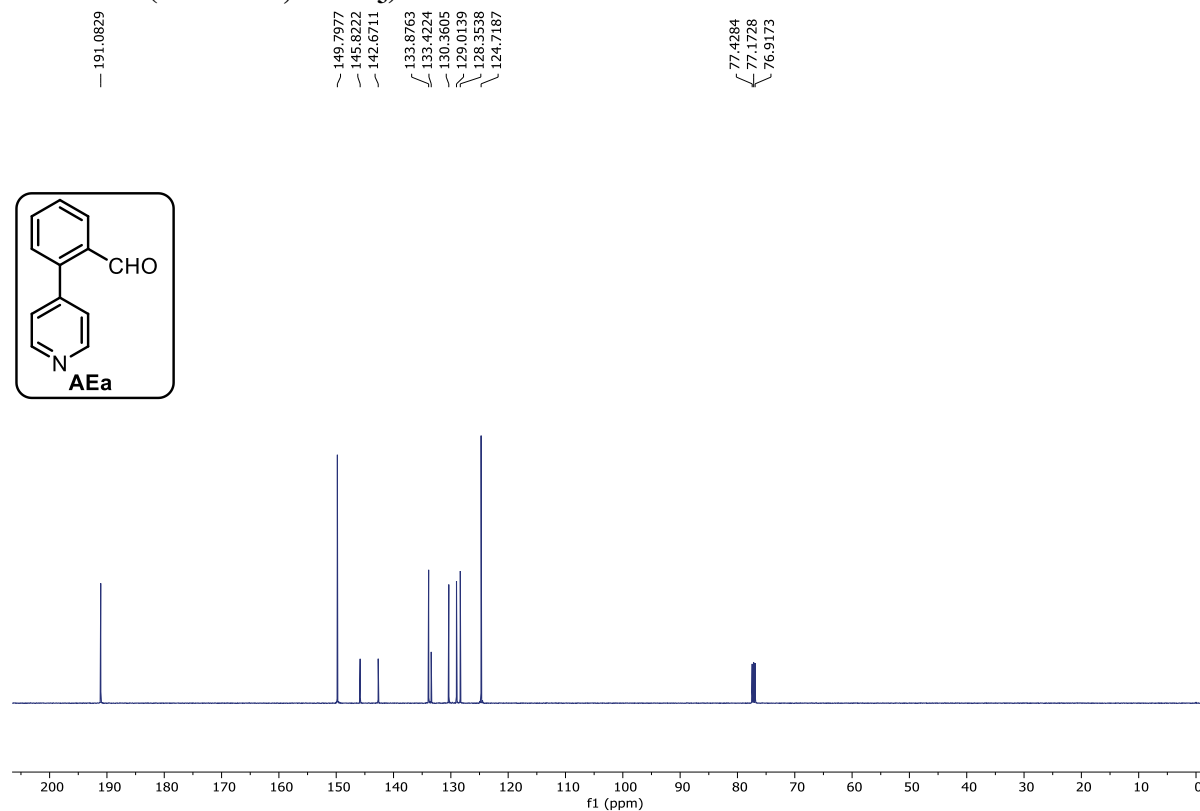

### $^1\text{H}$ NMR (400 MHz, $\text{CDCl}_3$ )

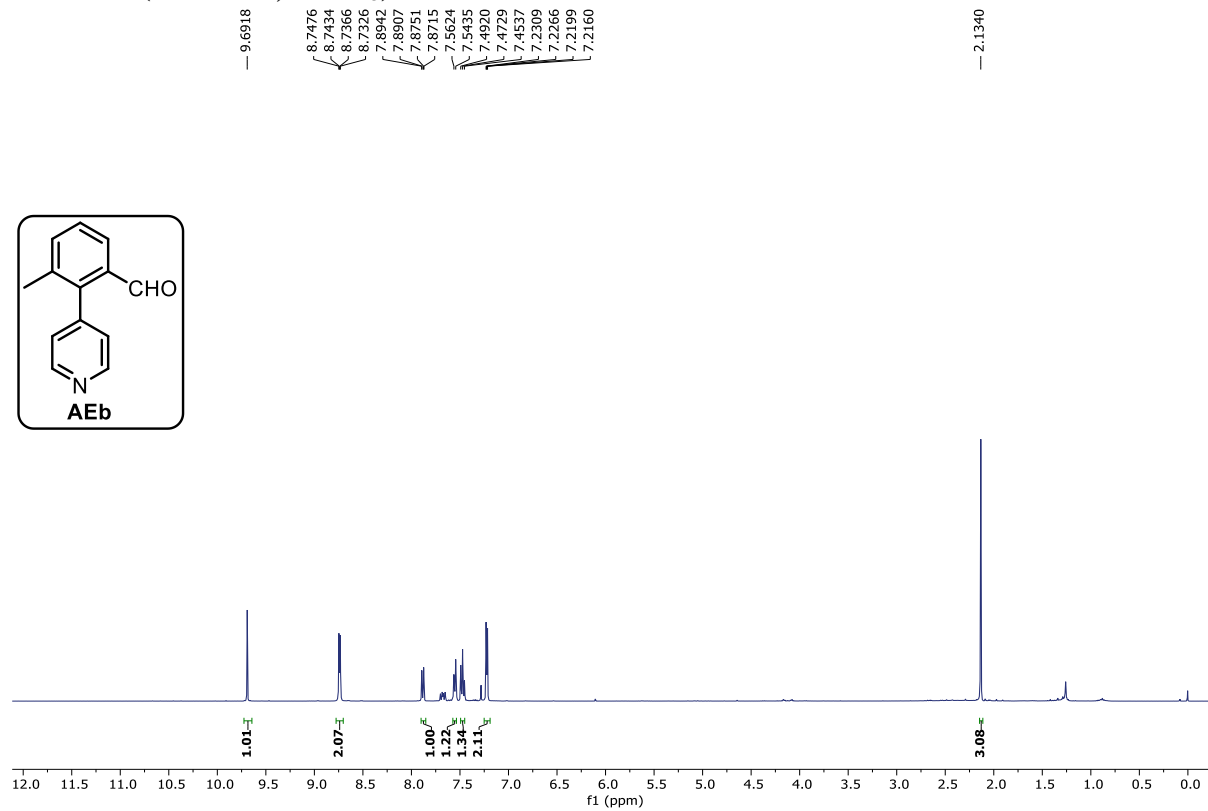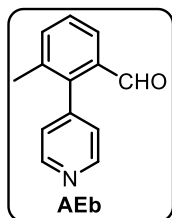

### $^{13}\text{C}$ NMR (100 MHz, $\text{CDCl}_3$ )

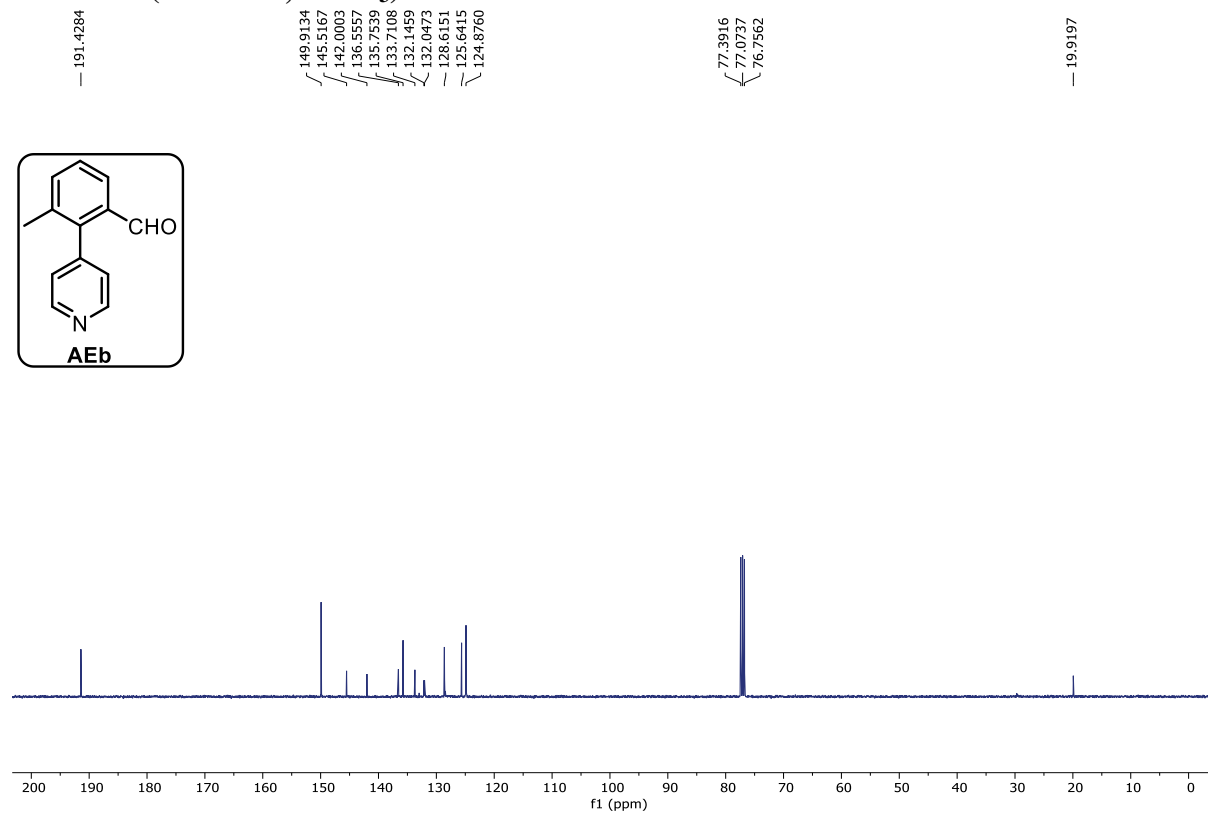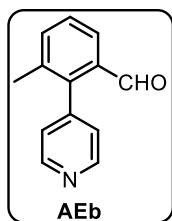

# <sup>1</sup>H NMR (400 MHz, CDCl<sub>3</sub>)

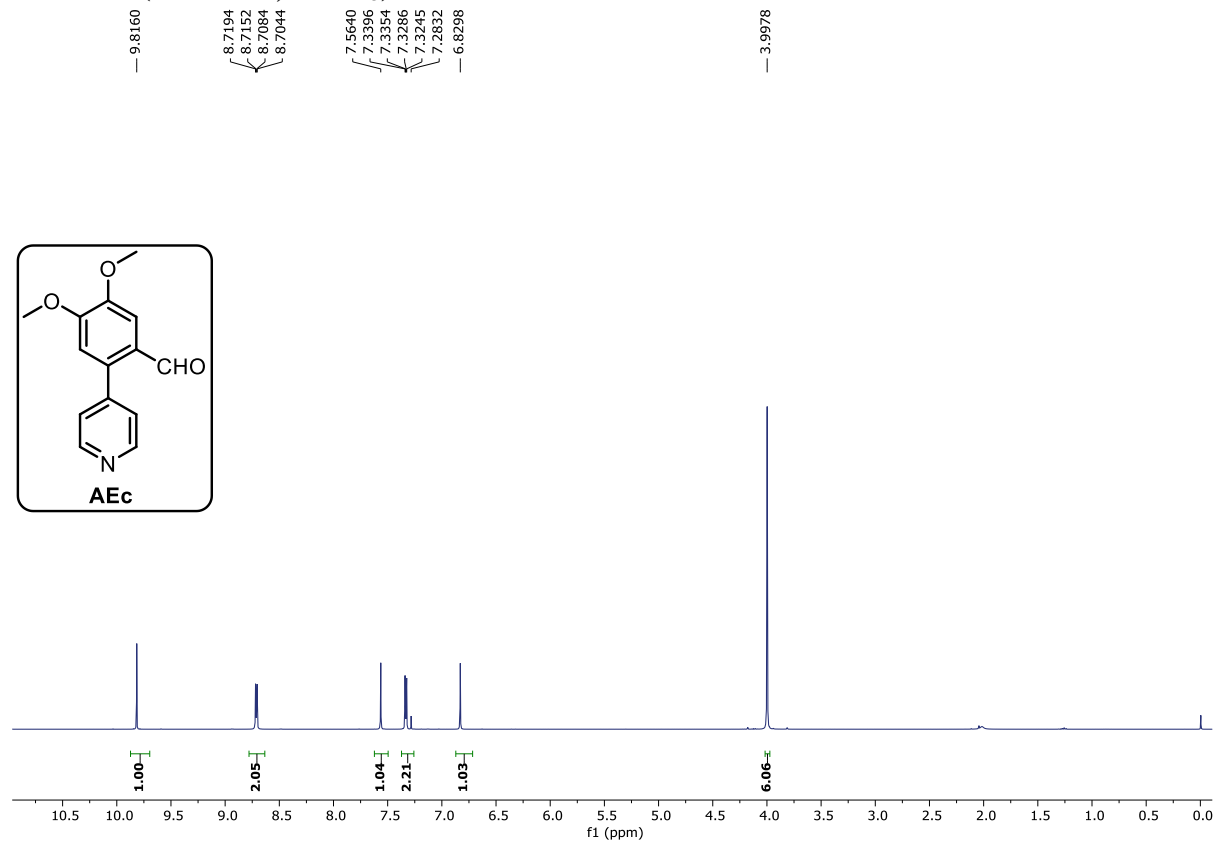

# <sup>13</sup>C NMR (100 MHz, CDCl<sub>3</sub>)

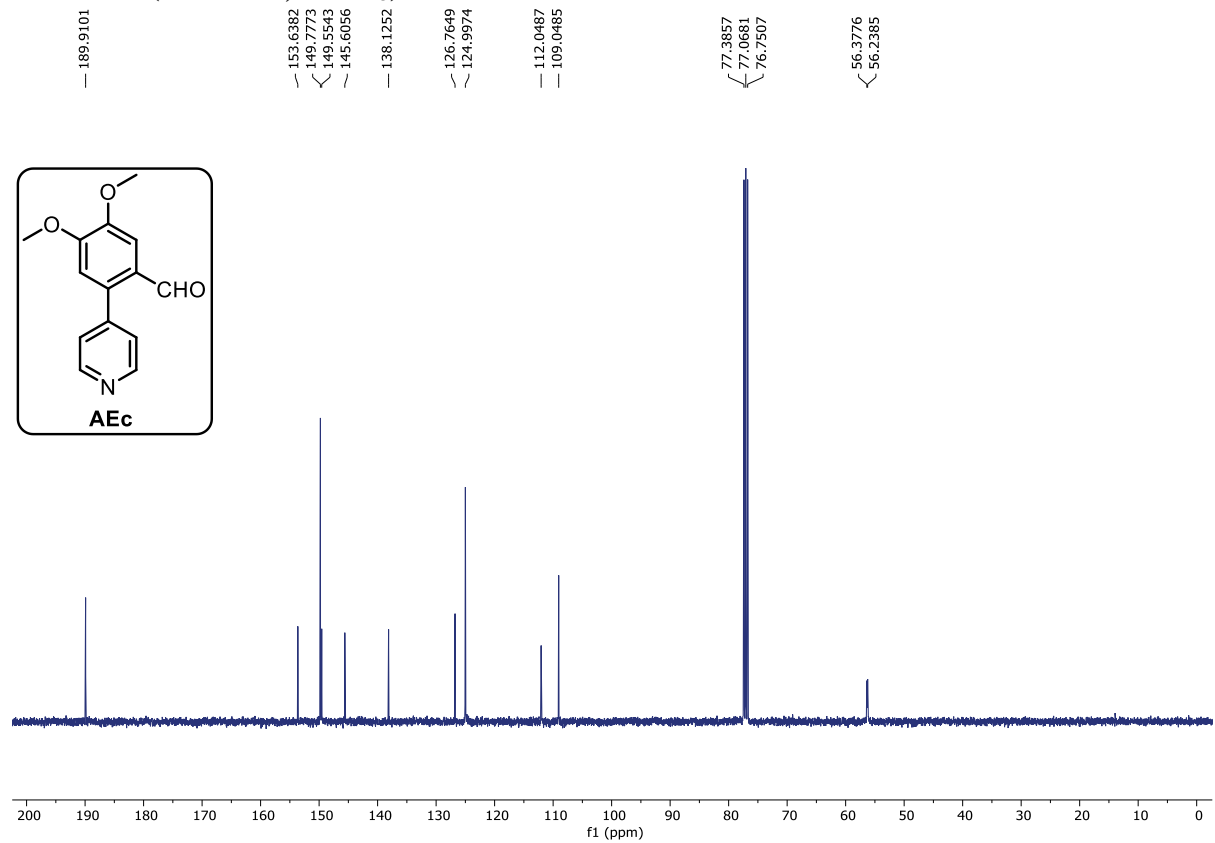

# <sup>1</sup>H NMR (400 MHz, CDCl<sub>3</sub>)

9.9912  
8.7888  
8.7846  
8.7779  
8.7738  
8.3305  
8.3286  
8.3270  
8.3253  
8.3237  
8.3219  
7.9626  
7.9607  
7.9578  
7.9558  
7.9425  
7.9404  
7.9375  
7.9357  
7.6106  
7.6088  
7.6069  
7.5904  
7.5888  
7.5870  
7.3621  
7.3578  
7.3511  
7.3469  
7.2836

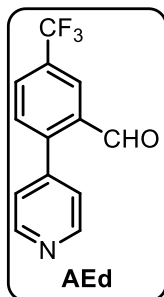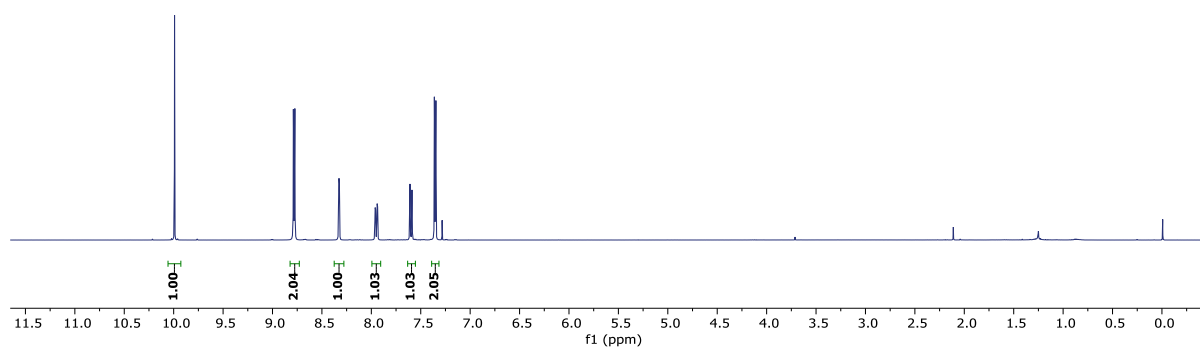

# <sup>13</sup>C NMR (100 MHz, CDCl<sub>3</sub>)

189.6441  
150.1109  
145.6751  
145.6659  
144.4501  
133.7443  
132.0908  
131.7570  
131.4228  
131.1818  
131.0889  
130.2356  
130.2015  
130.1669  
130.1319  
127.4044  
125.5315  
125.4939  
125.4566  
125.4192  
124.6948  
124.4509  
121.9850  
119.2733  
77.3814  
77.0642  
76.7464

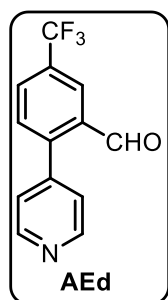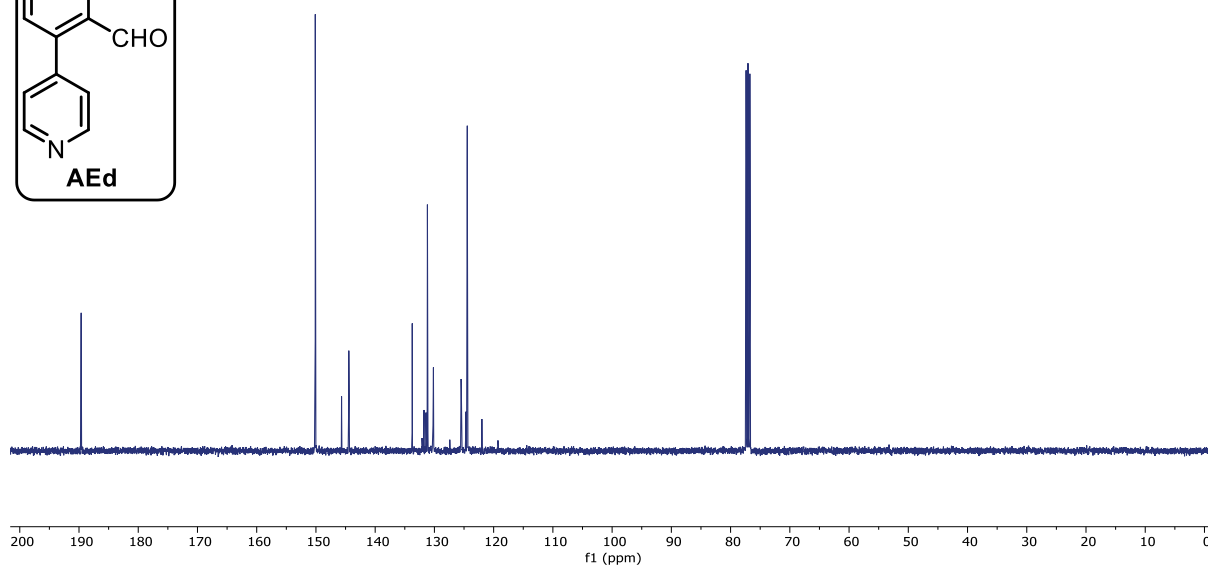

**$^{19}\text{F}$  NMR (376 MHz,  $\text{CDCl}_3$ )**

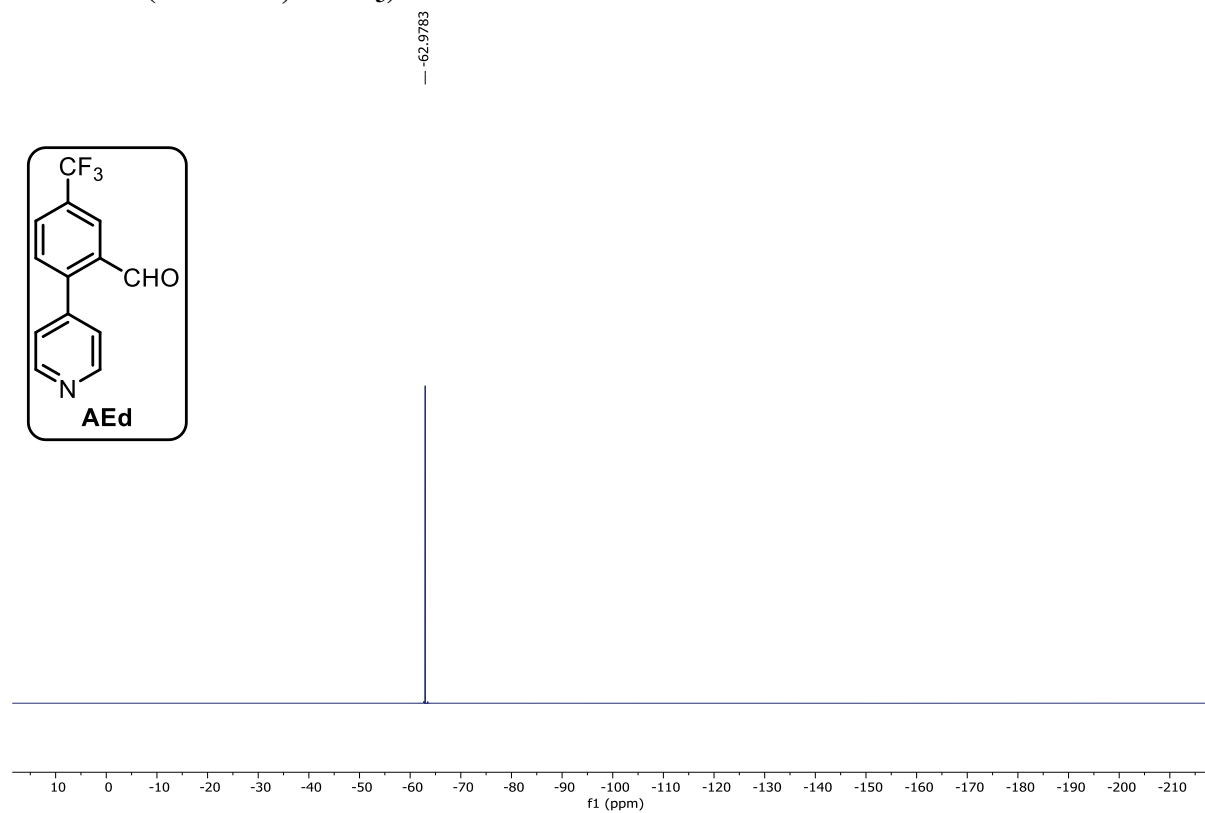

**$^1\text{H}$  NMR (500 MHz,  $\text{CDCl}_3$ )**

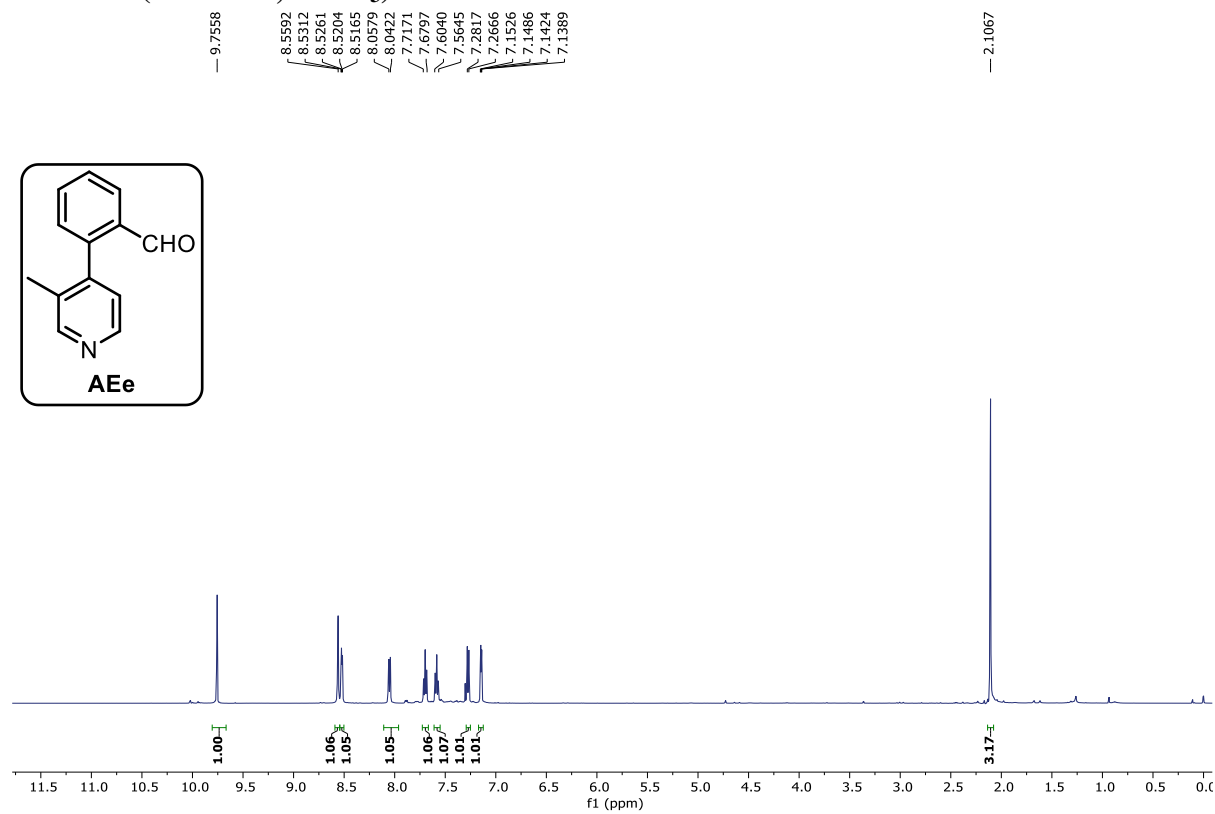

### $^{13}\text{C}$ NMR (125 MHz, $\text{CDCl}_3$ )

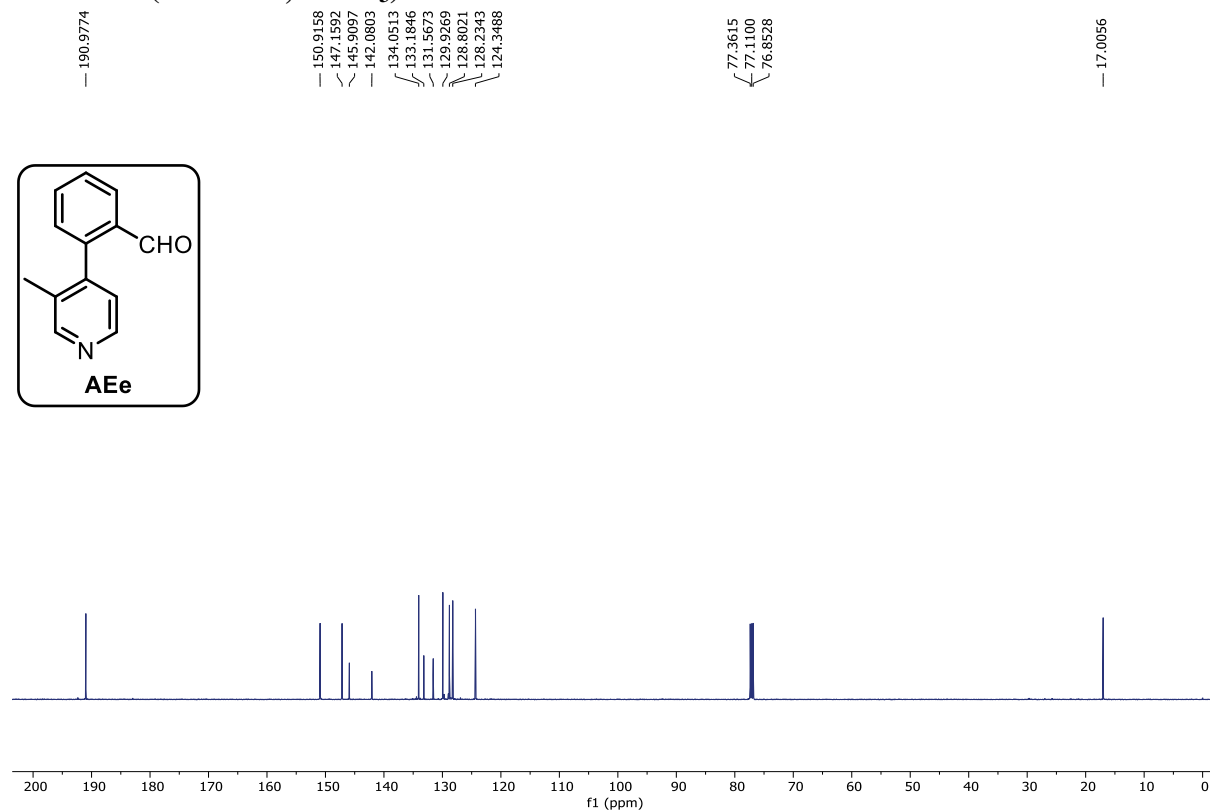

### $^1\text{H}$ NMR (400 MHz, $\text{CDCl}_3$ )

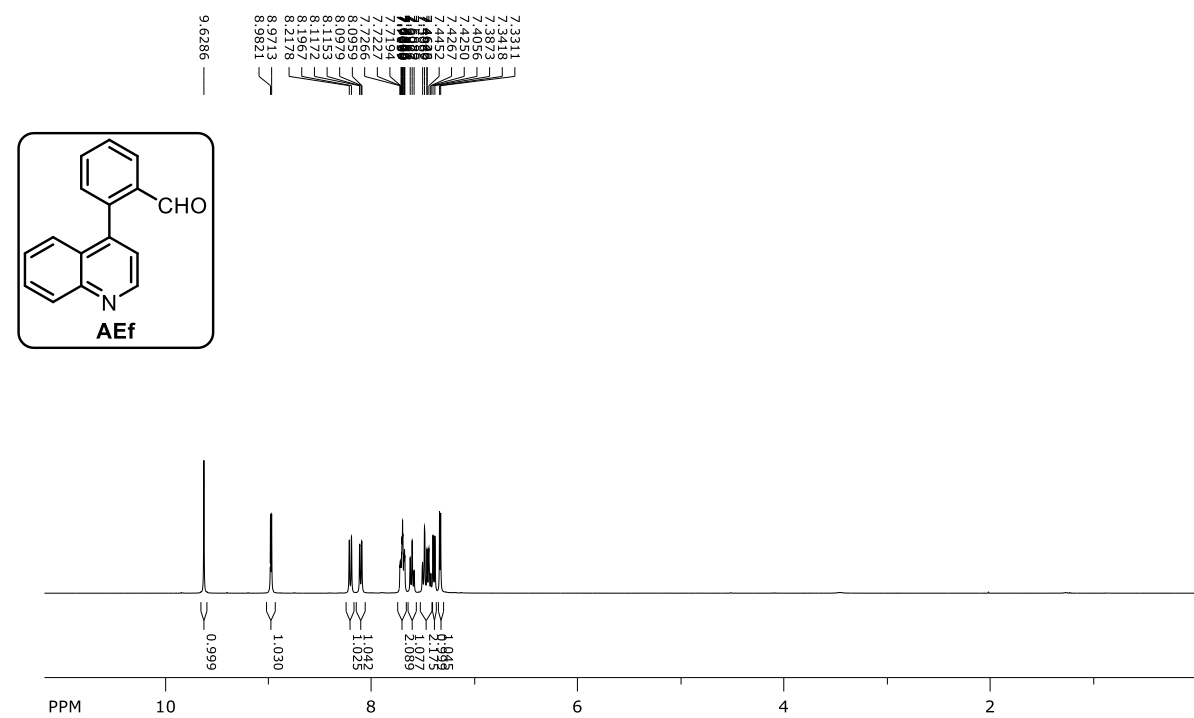



### <sup>13</sup>C NMR (100 MHz, CDCl<sub>3</sub>)

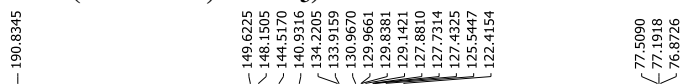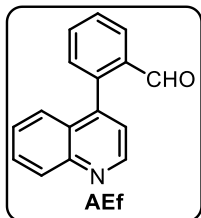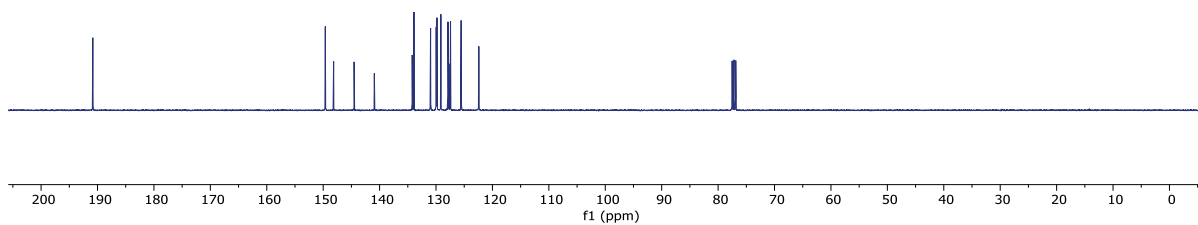

### <sup>1</sup>H NMR (400 MHz, CDCl<sub>3</sub>)

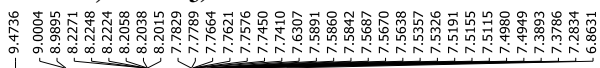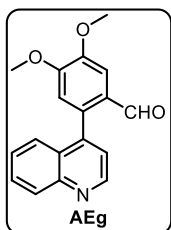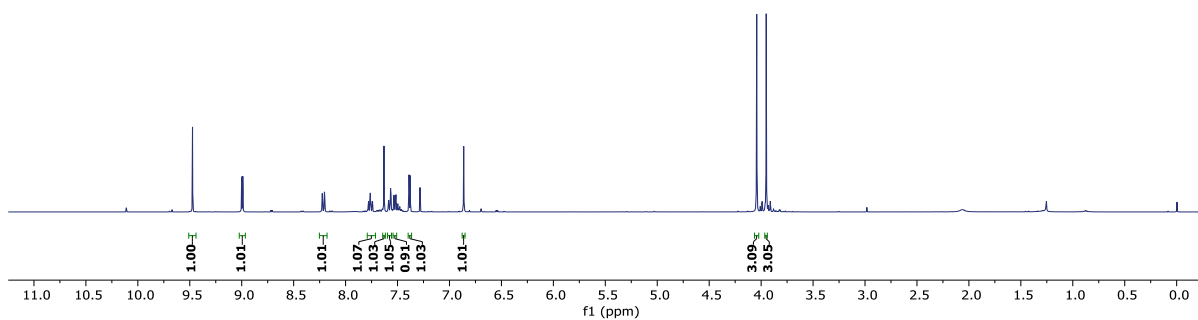

### $^{13}\text{C}$ NMR (100 MHz, $\text{CDCl}_3$ )

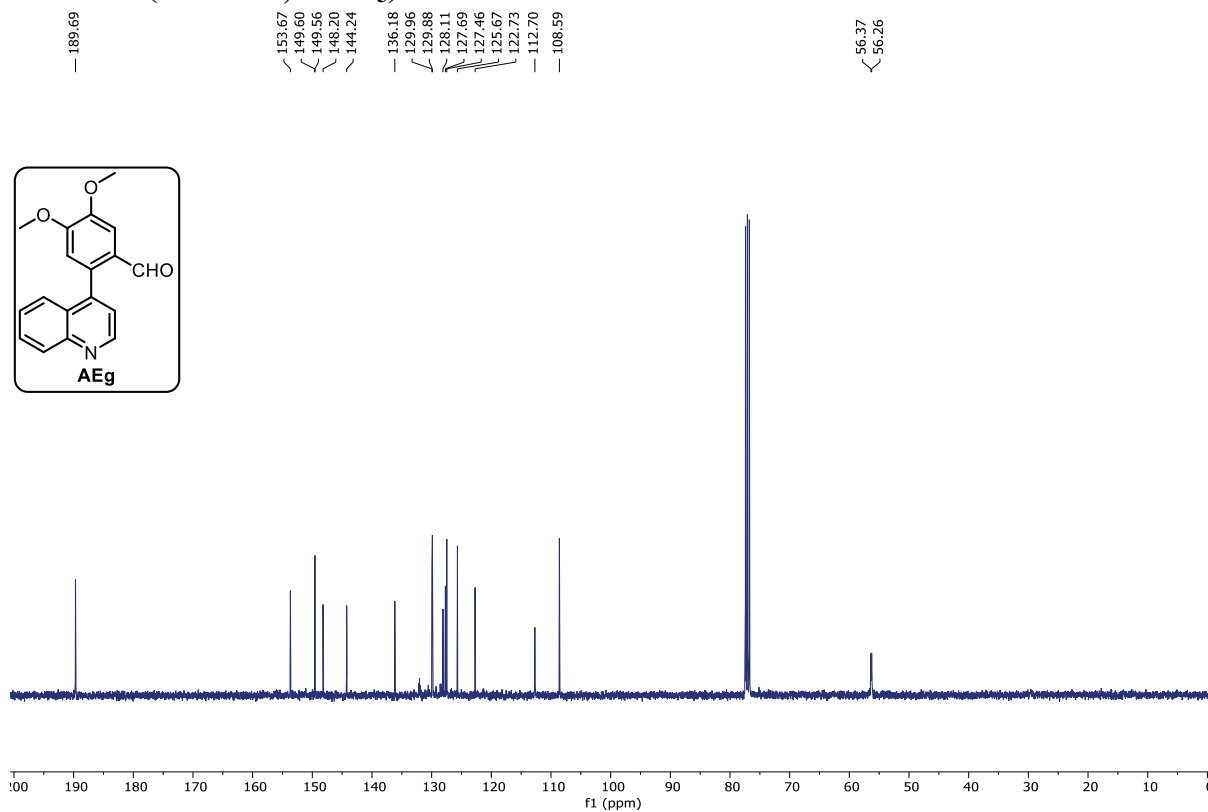

### $^1\text{H}$ NMR (400 MHz, $\text{CDCl}_3$ )

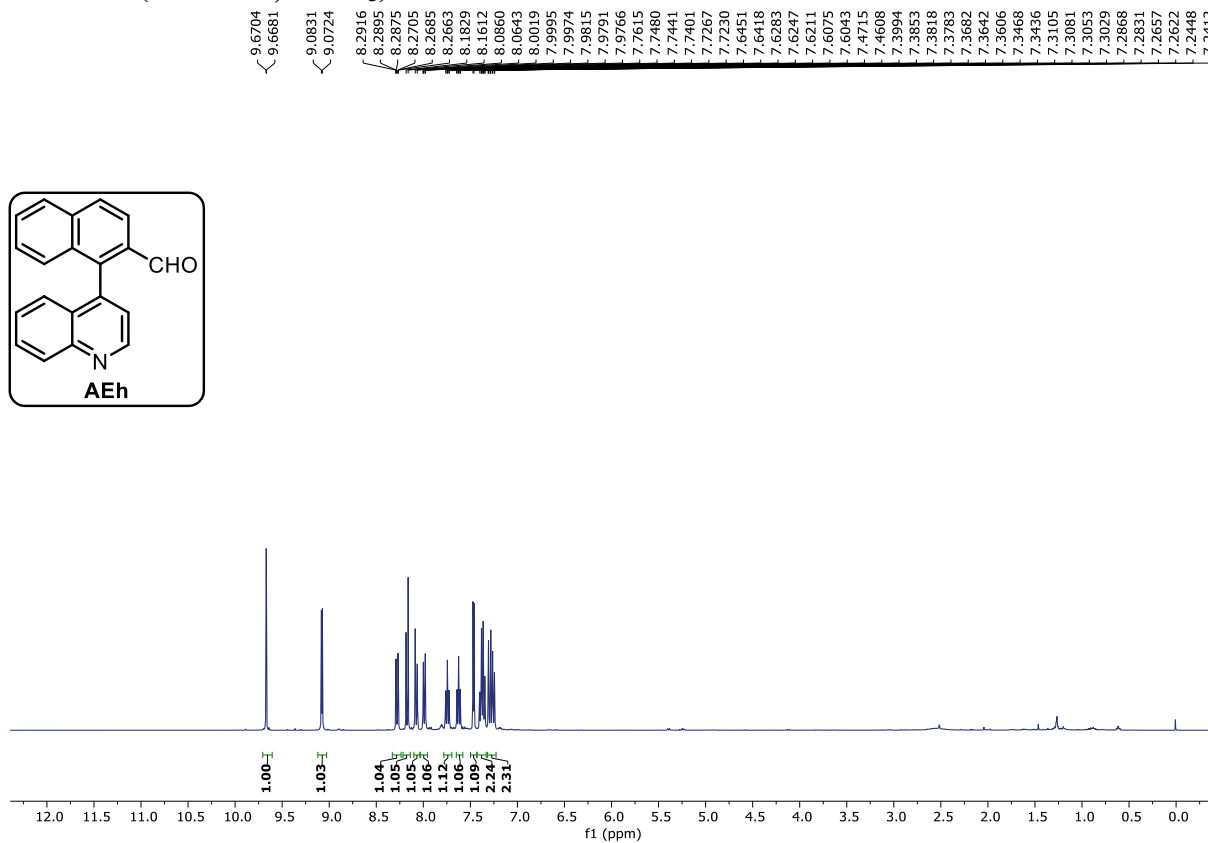

**$^{13}\text{C}$  NMR (125 MHz,  $\text{CDCl}_3$ )**

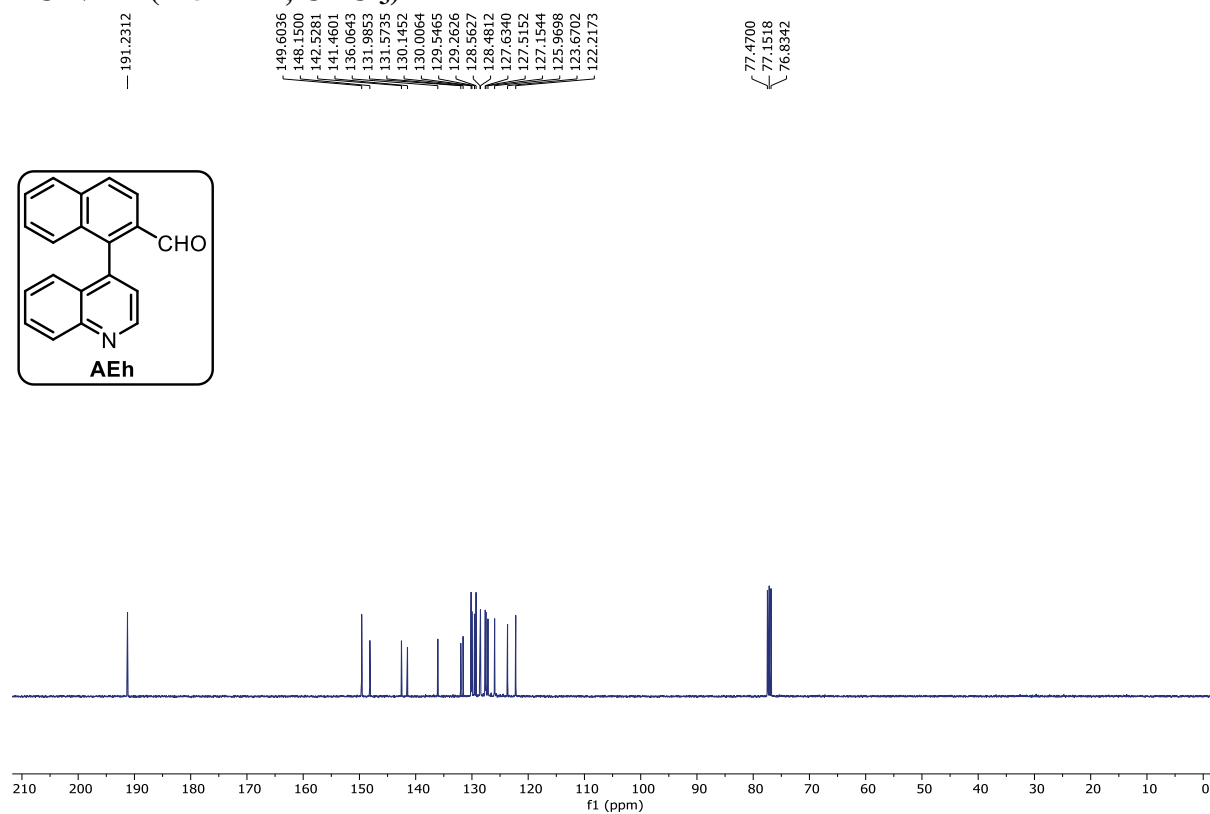

**$^1\text{H}$  NMR (400 MHz,  $\text{CDCl}_3$ )**

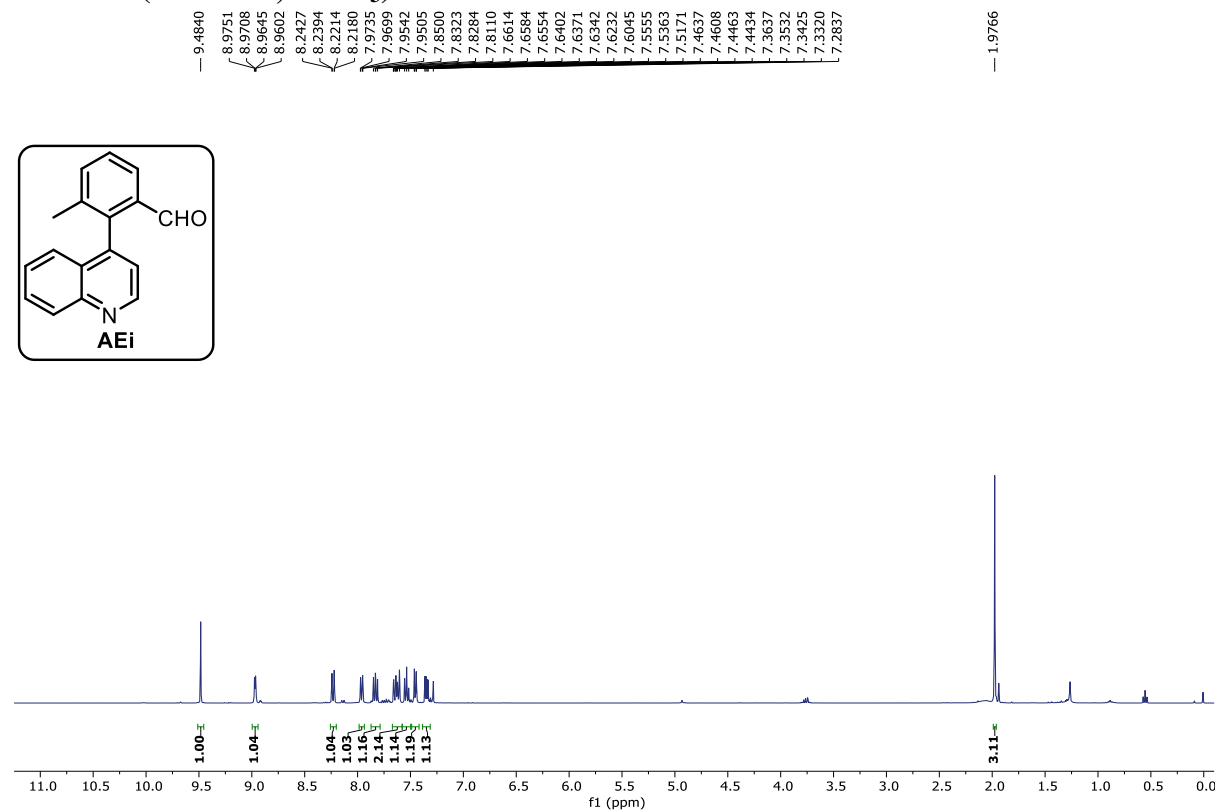

**$^{13}\text{C}$  NMR (100 MHz,  $\text{CDCl}_3$ )**

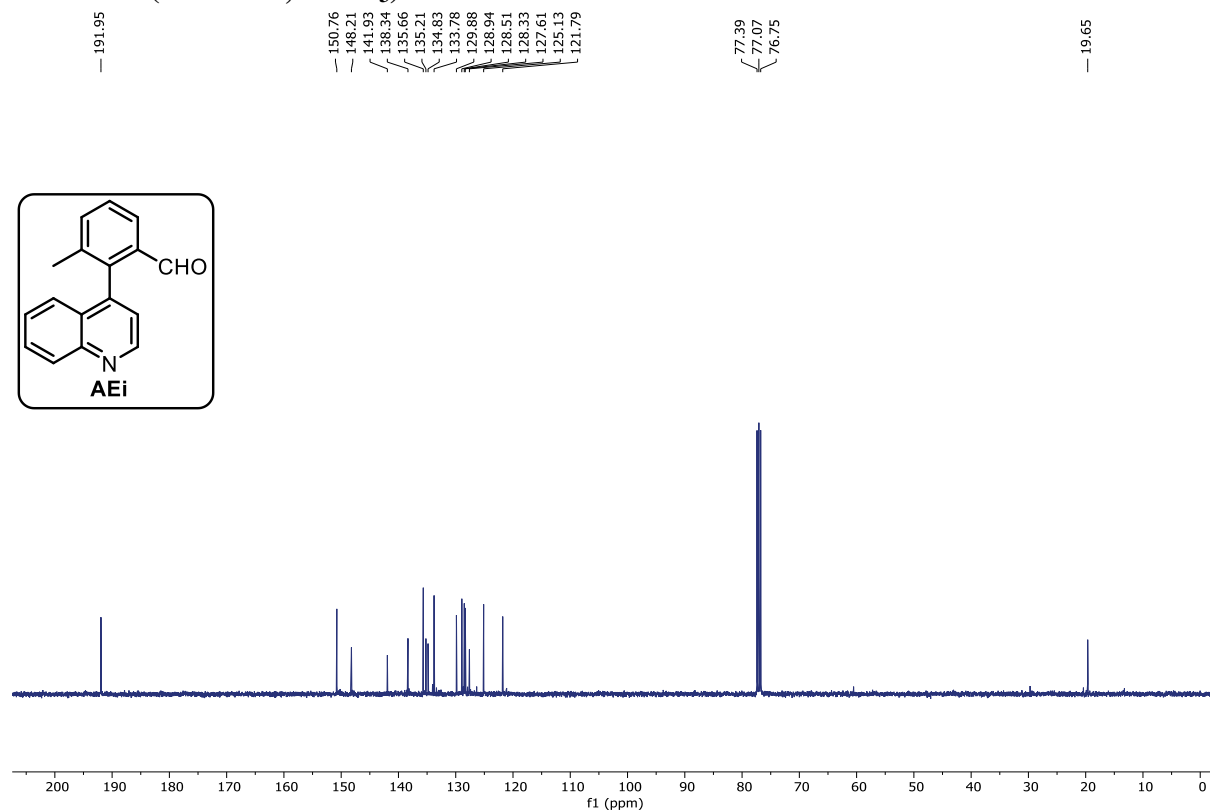

**$^1\text{H}$  NMR (400 MHz,  $\text{CDCl}_3$ )**

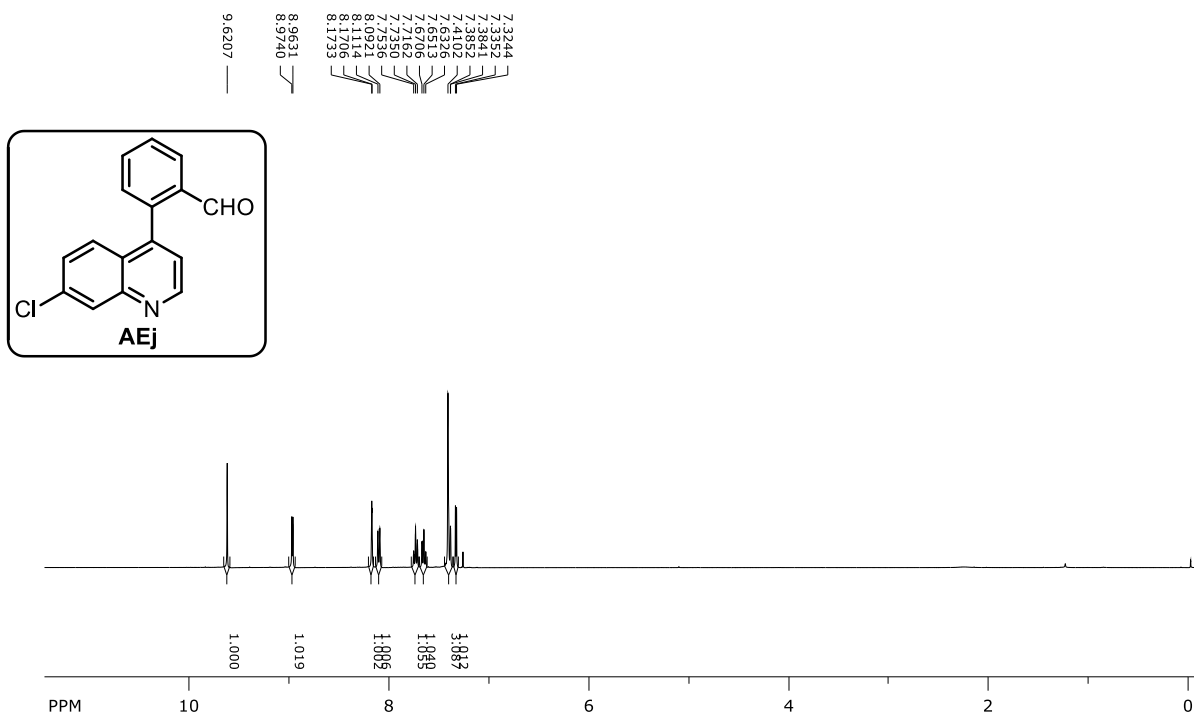

<sup>13</sup>C NMR (100 MHz, CDCl<sub>3</sub>)

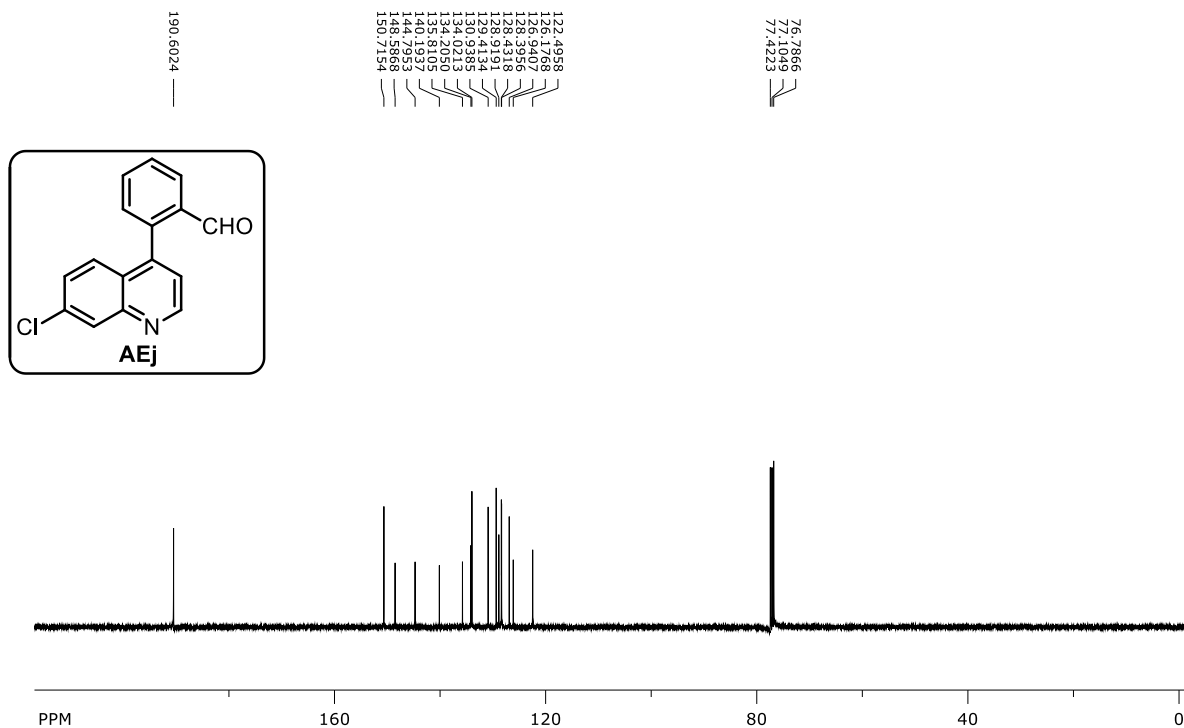

<sup>1</sup>H NMR (400 MHz, CDCl<sub>3</sub>)

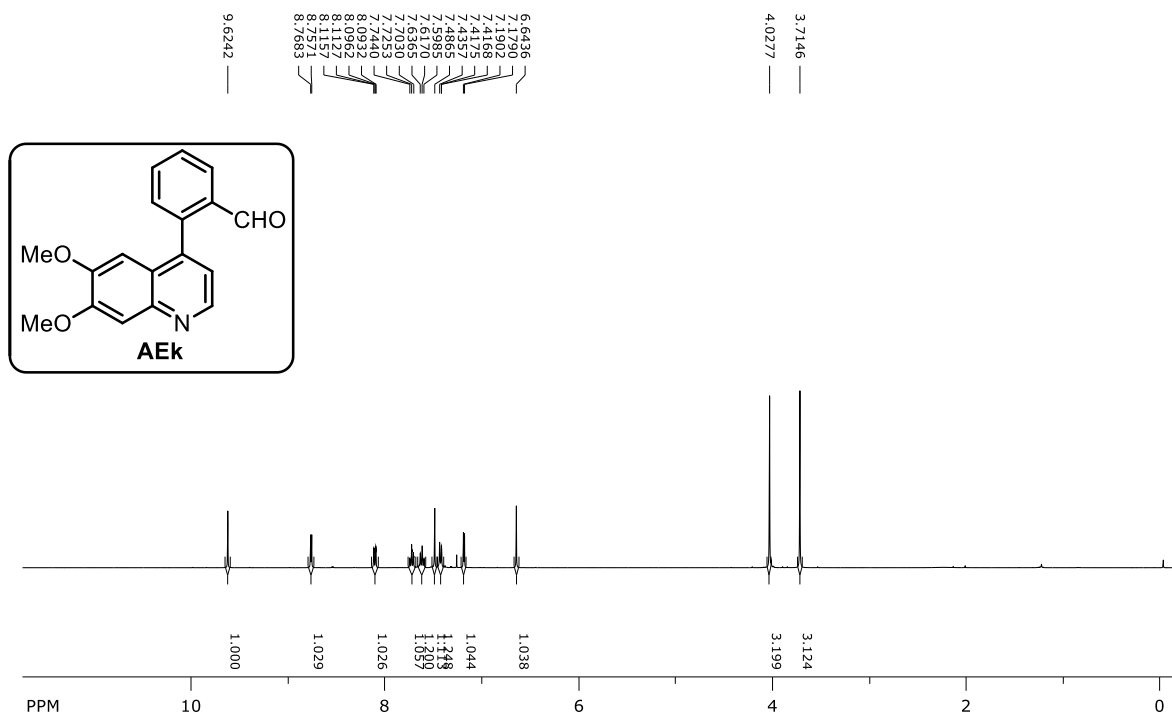

### $^{13}\text{C}$ NMR (100 MHz, $\text{CDCl}_3$ )

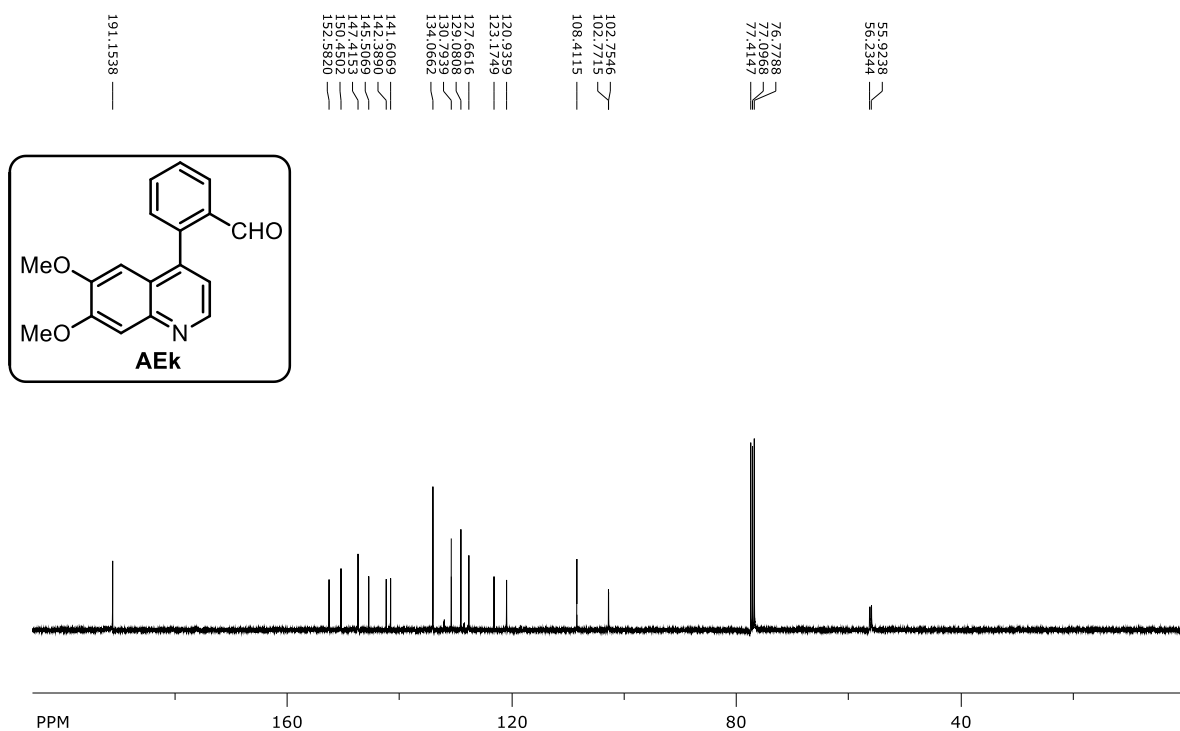

### $^1\text{H}$ NMR (500 MHz, $\text{CDCl}_3$ )

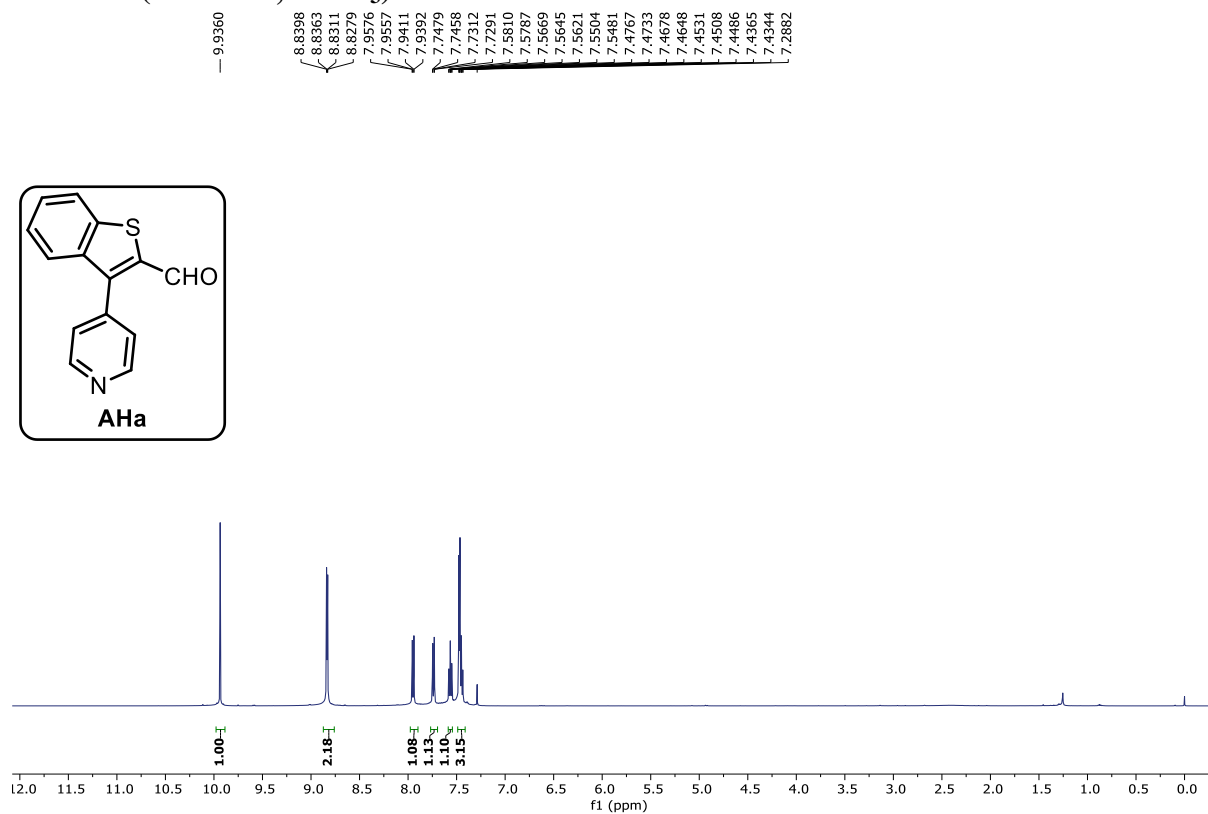

### $^{13}\text{C}$ NMR (125 MHz, $\text{CDCl}_3$ )

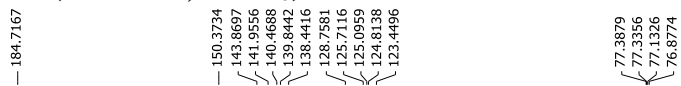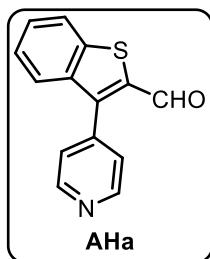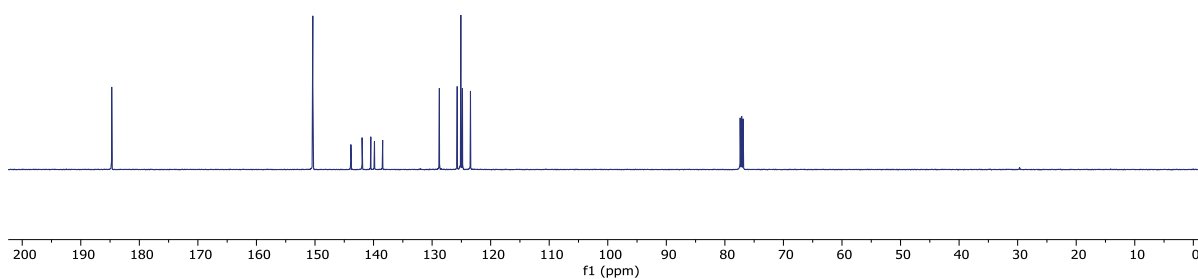

### $^1\text{H}$ NMR (400 MHz, $\text{CDCl}_3$ )

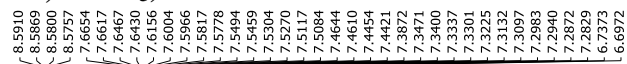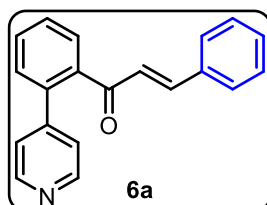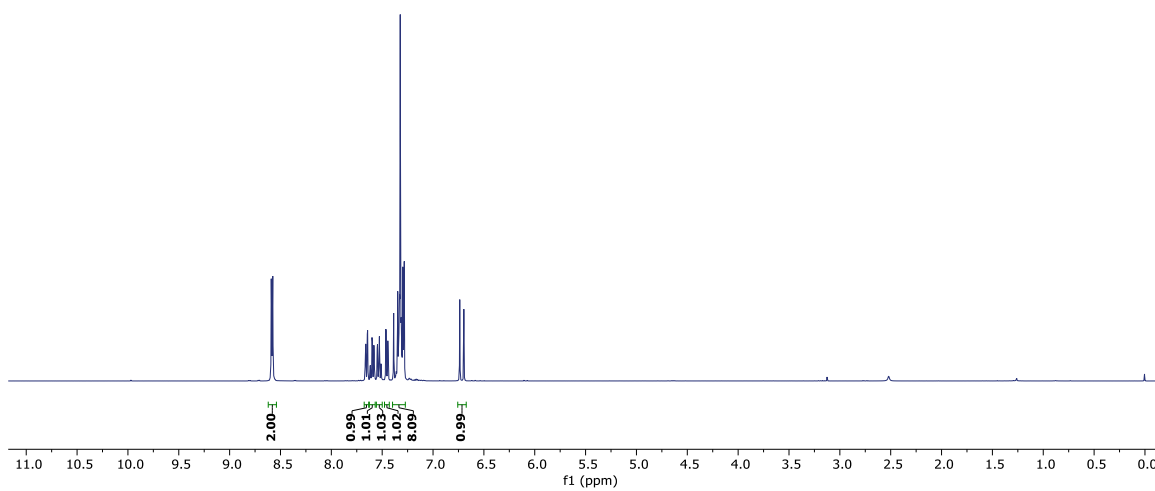



### $^{13}\text{C}$ NMR (100 MHz, $\text{CDCl}_3$ )

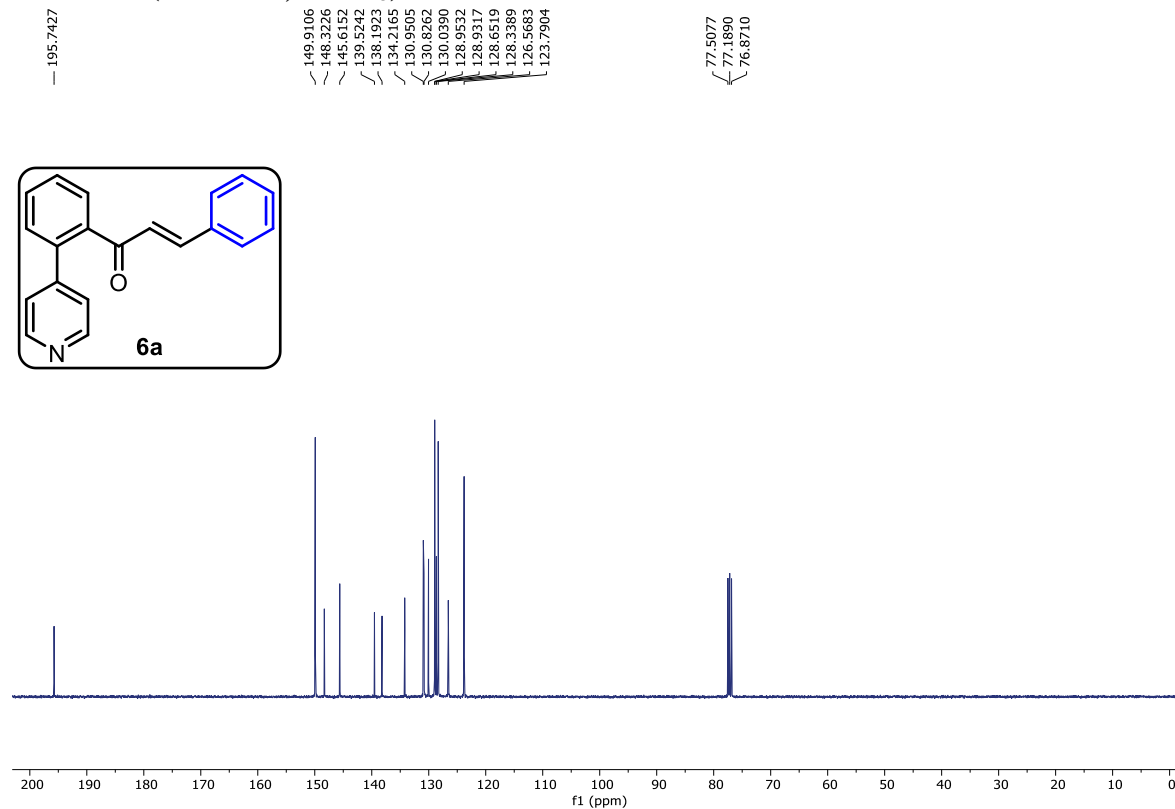

### $^1\text{H}$ NMR (500 MHz, $\text{CDCl}_3$ )

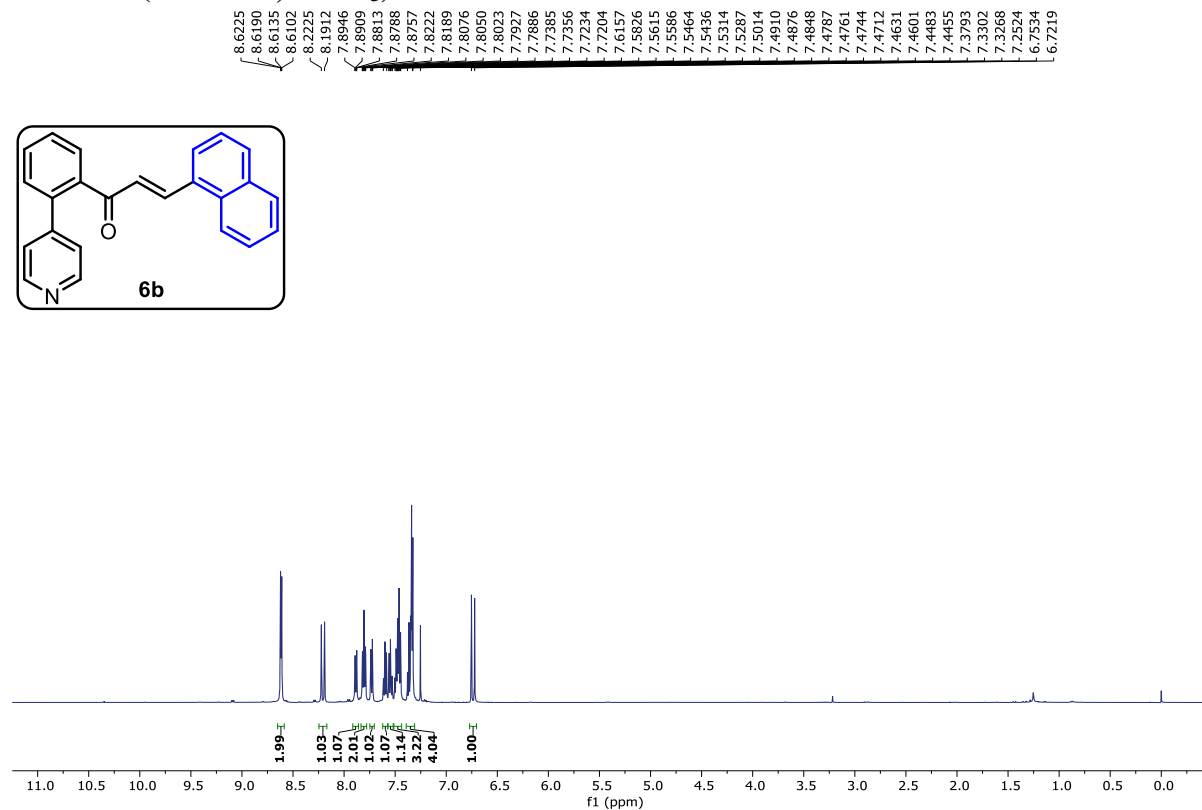

### $^{13}\text{C}$ NMR (125 MHz, $\text{CDCl}_3$ )

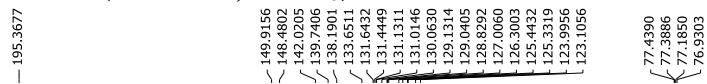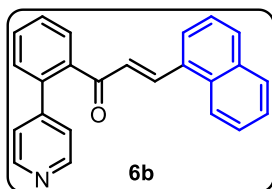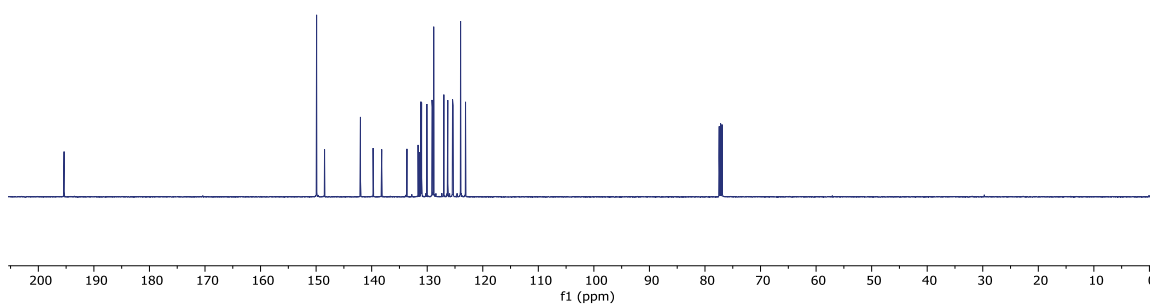

### $^1\text{H}$ NMR (500 MHz, $\text{CDCl}_3$ )

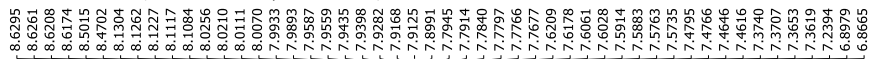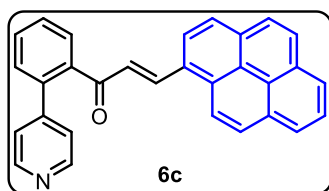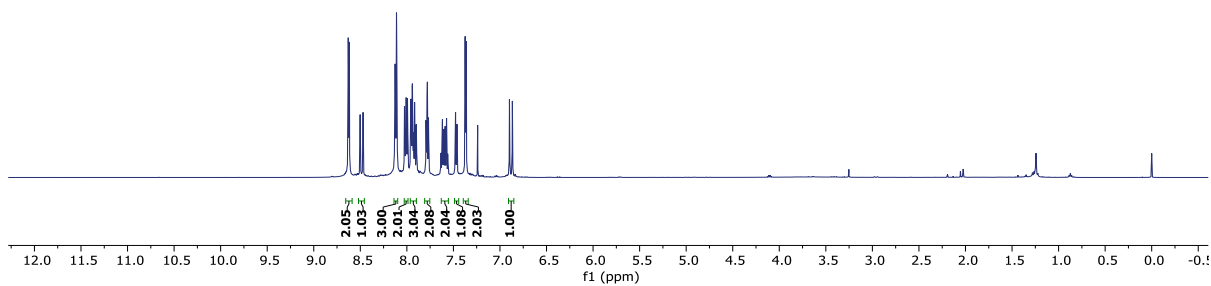

### $^{13}\text{C}$ NMR (125 MHz, $\text{CDCl}_3$ )

195.1591  
149.9247  
148.5929  
141.6910  
139.9599  
138.2769  
132.9703  
131.1898  
131.1051  
130.5421  
130.1117  
130.0615  
129.1764  
128.8392  
128.8087  
128.7236  
128.2768  
127.9947  
127.2530  
126.3006  
126.1593  
125.9410  
125.0243  
124.7629  
124.4409  
124.1482  
124.0319  
122.1113  
77.3698  
77.1147  
76.8598

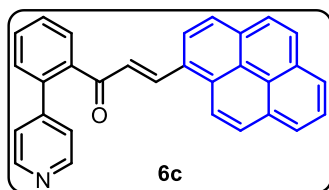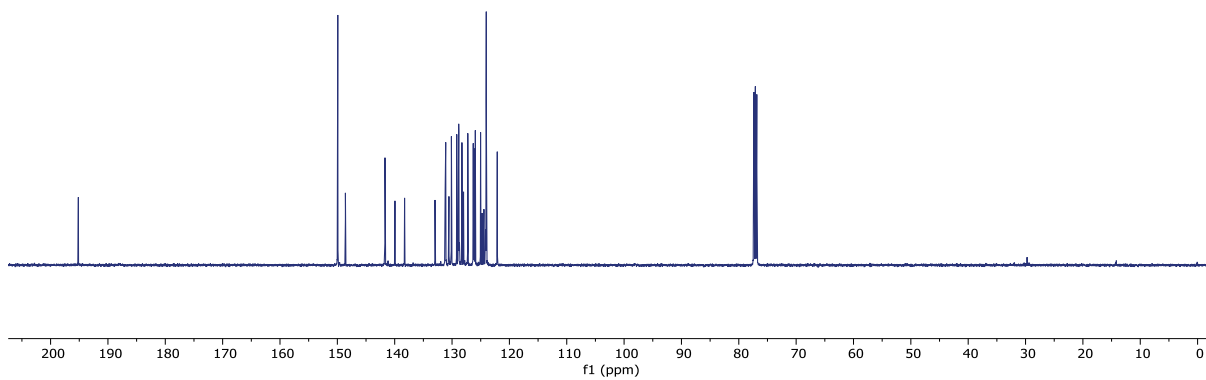

### $^1\text{H}$ NMR (400 MHz, $\text{CDCl}_3$ )

8.5816  
8.5774  
8.5706  
8.5665  
7.6536  
7.6498  
7.6348  
7.6311  
7.5929  
7.5891  
7.5741  
7.5702  
7.5434  
7.5399  
7.5247  
7.5213  
7.4584  
7.4550  
7.4395  
7.4361  
7.3595  
7.3194  
7.2976  
7.2932  
7.2863  
7.2822  
7.2434  
7.2236  
7.1361  
7.1164  
6.7088  
6.6667  
2.3314

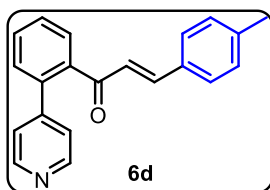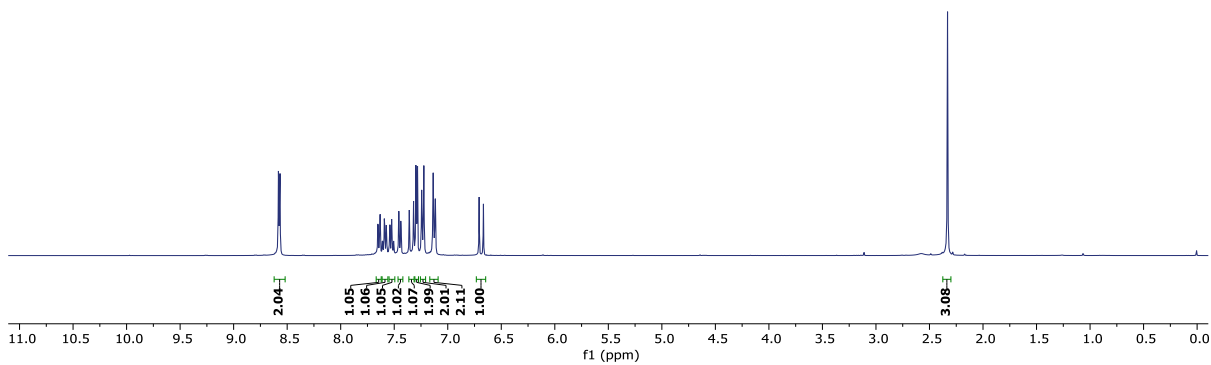

### <sup>13</sup>C NMR (100 MHz, CDCl<sub>3</sub>)

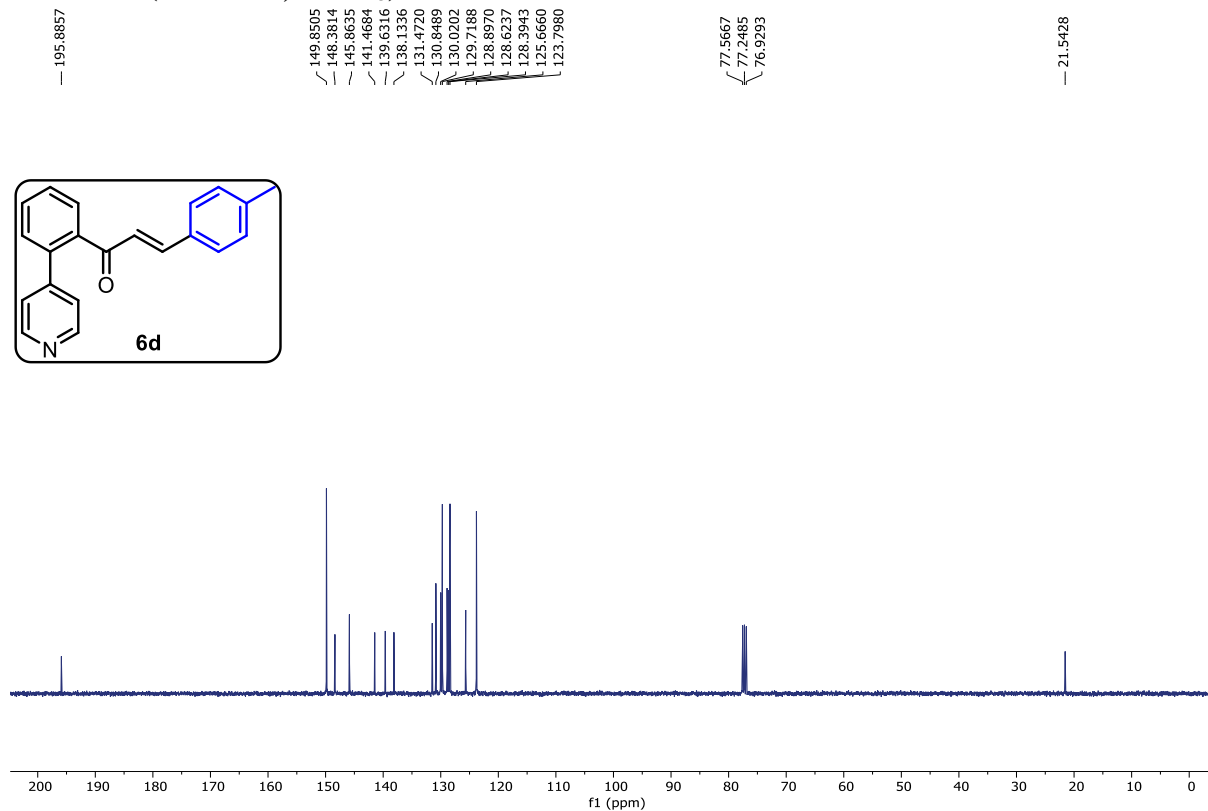

### <sup>1</sup>H NMR (400 MHz, CDCl<sub>3</sub>)

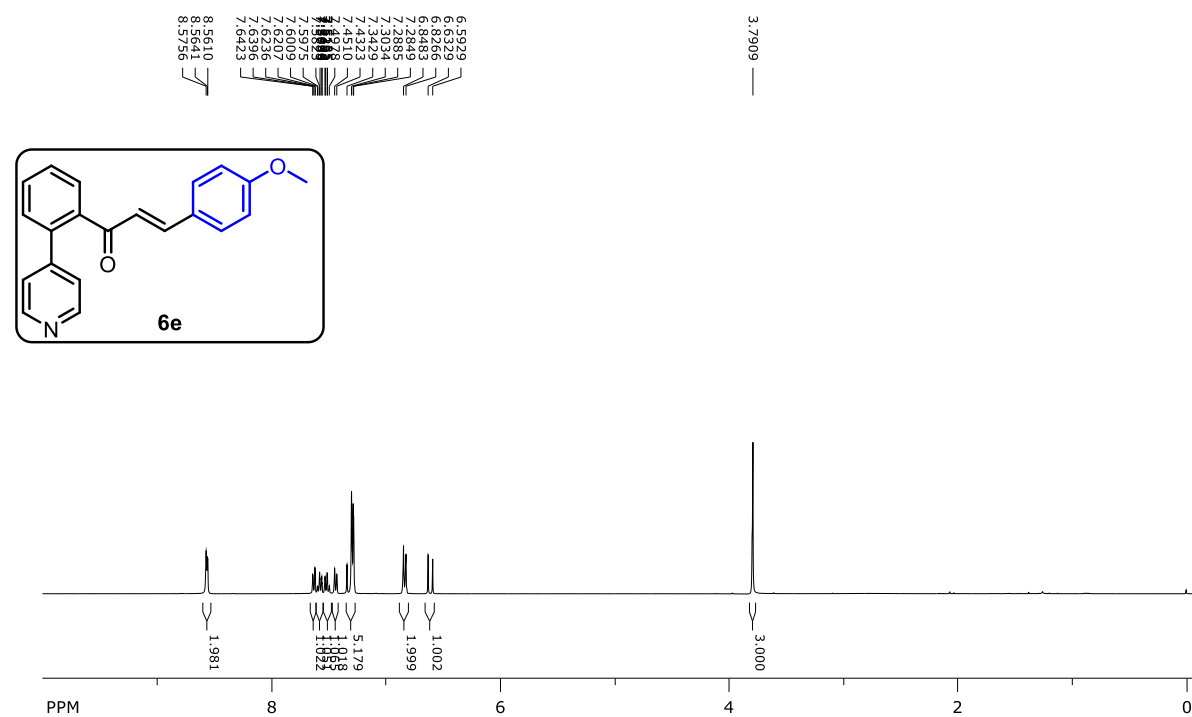

### $^{13}\text{C}$ NMR (100 MHz, $\text{CDCl}_3$ )

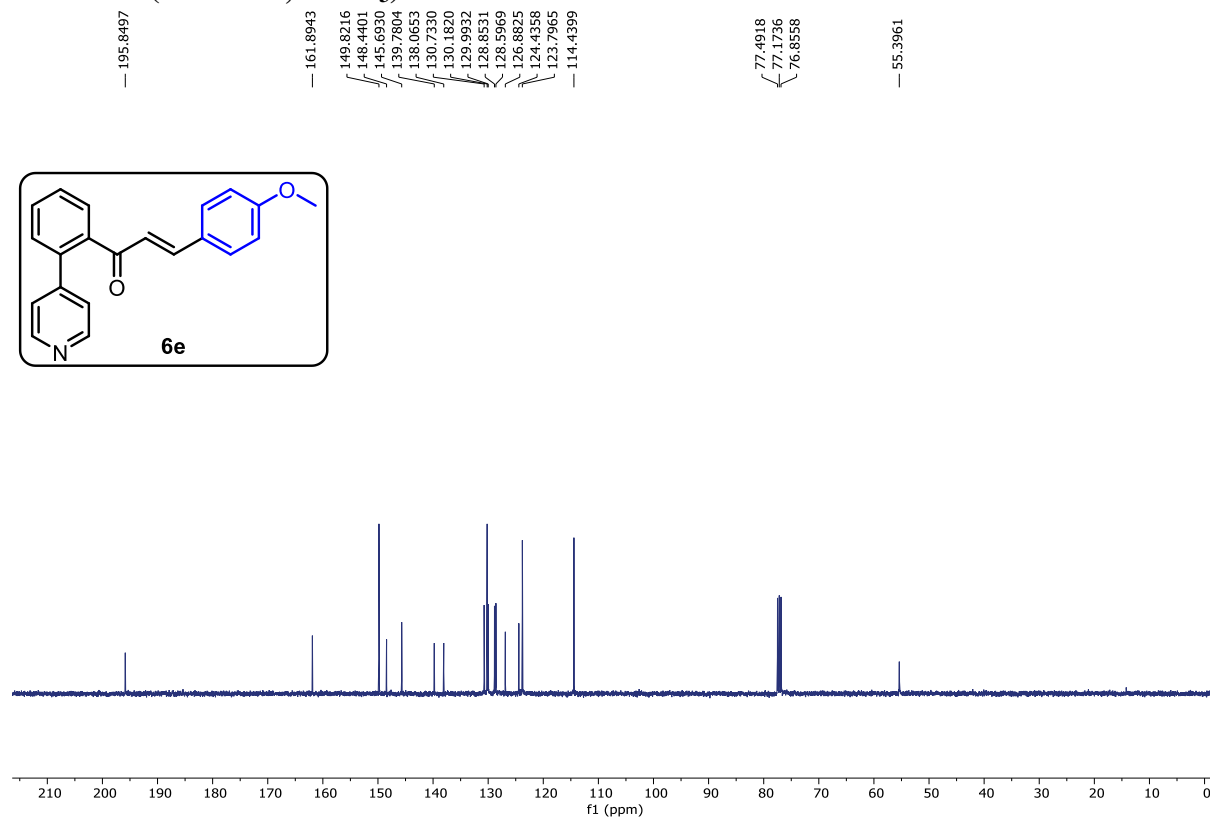

### $^1\text{H}$ NMR (400 MHz, $\text{CDCl}_3$ )

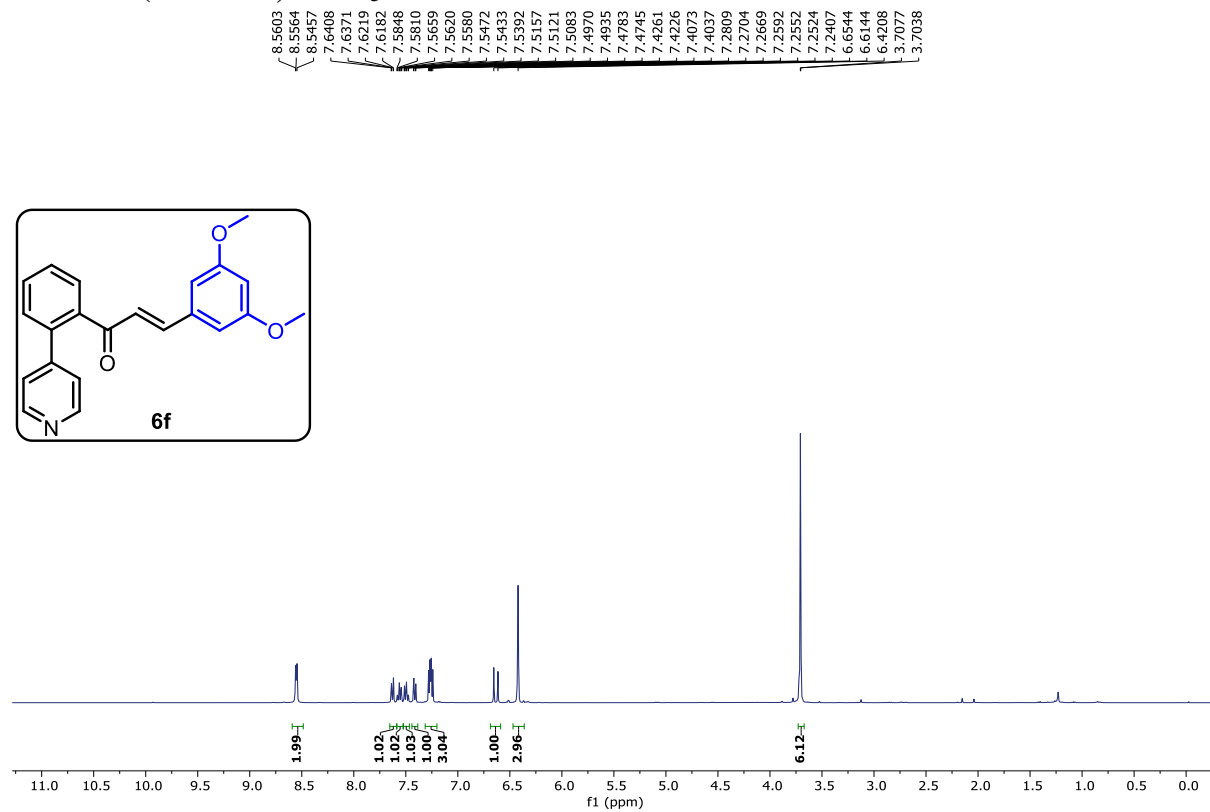

**<sup>13</sup>C NMR (100 MHz, CDCl<sub>3</sub>)**

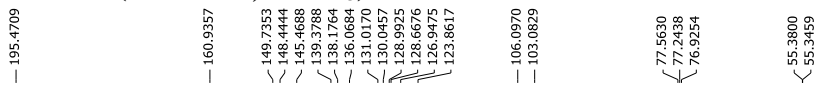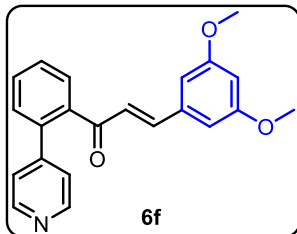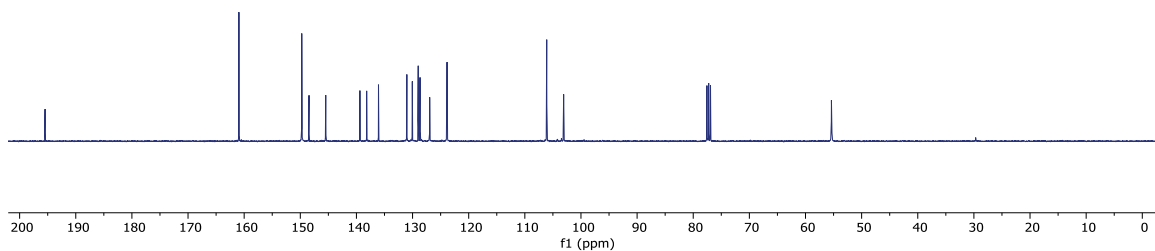

**<sup>1</sup>H NMR (400 MHz, CDCl<sub>3</sub>)**

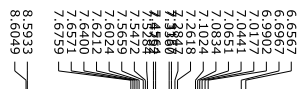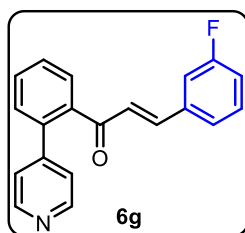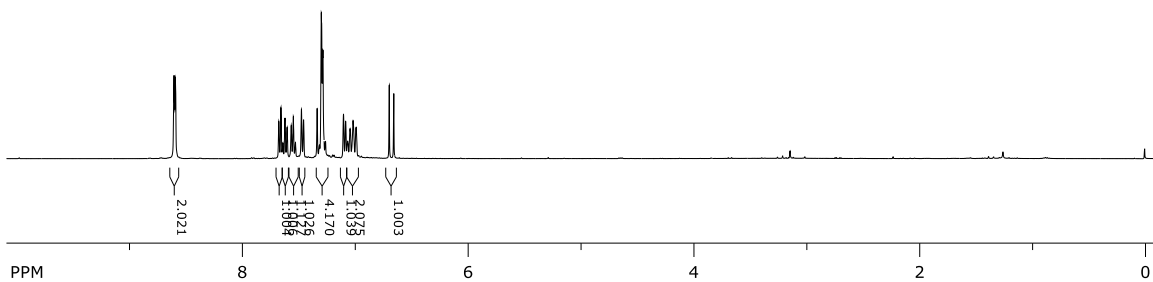

### <sup>13</sup>C NMR (100 MHz, CDCl<sub>3</sub>)

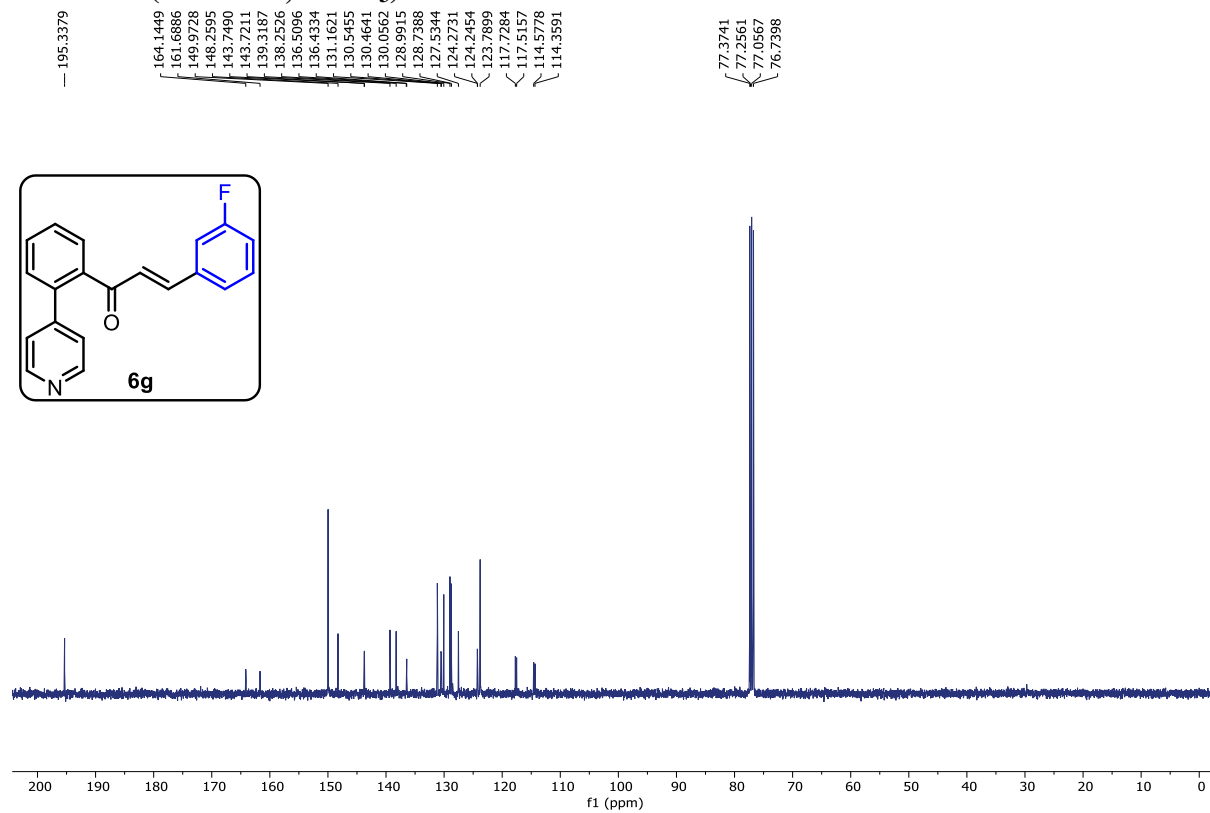

### <sup>19</sup>F NMR (376 MHz, CDCl<sub>3</sub>)

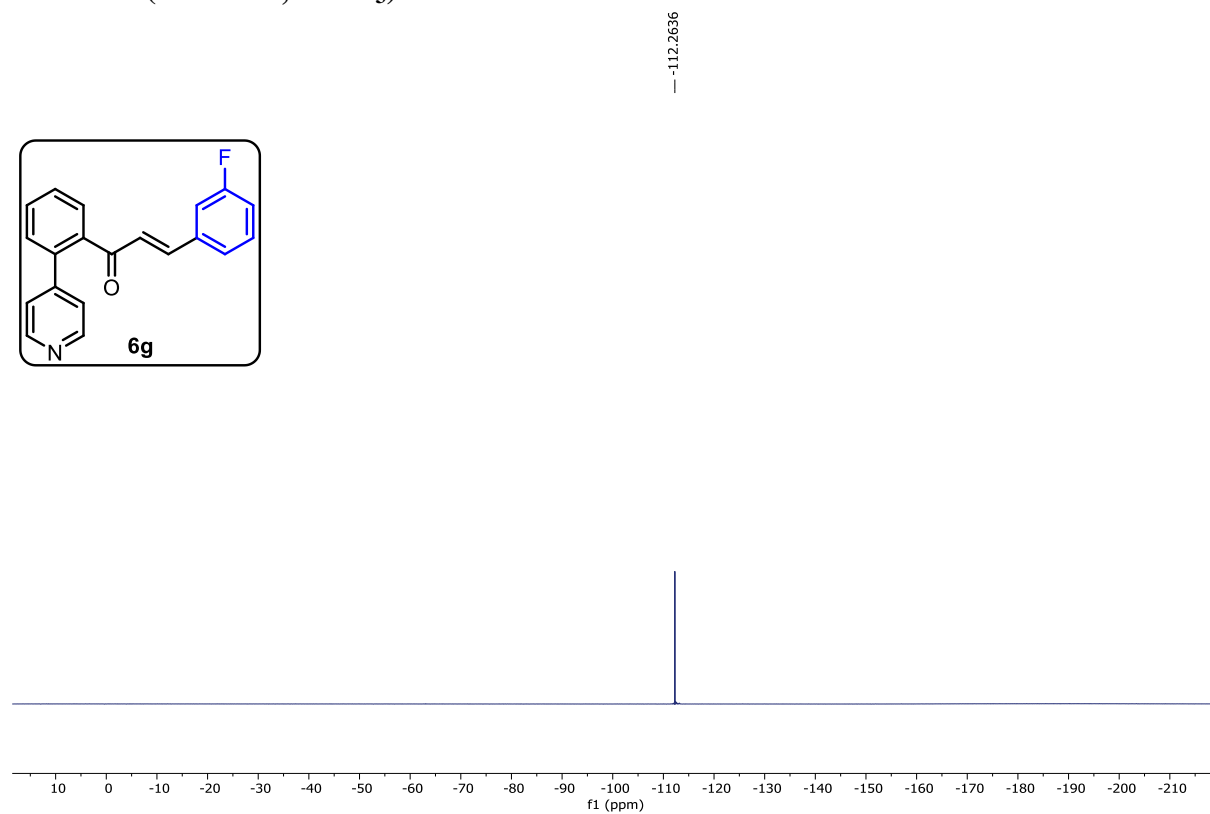



# <sup>1</sup>H NMR (500 MHz, CDCl<sub>3</sub>)

8.6180, 8.6138, 8.6067, 8.6034, 8.5979, 8.5945, 7.6906, 7.6737, 7.6706, 7.6653, 7.6586, 7.6556, 7.6285, 7.6235, 7.6134, 7.6105, 7.5983, 7.5953, 7.5625, 7.5598, 7.5547, 7.5506, 7.5472, 7.5450, 7.5433, 7.5385, 7.5322, 7.5298, 7.5277, 7.4740, 7.4714, 7.4588, 7.4561, 7.3256, 7.3221, 7.3028, 7.2750, 7.2511, 7.2486, 7.2277, 7.1905, 7.1679, 7.1632, 6.6040, 6.5719

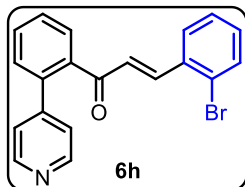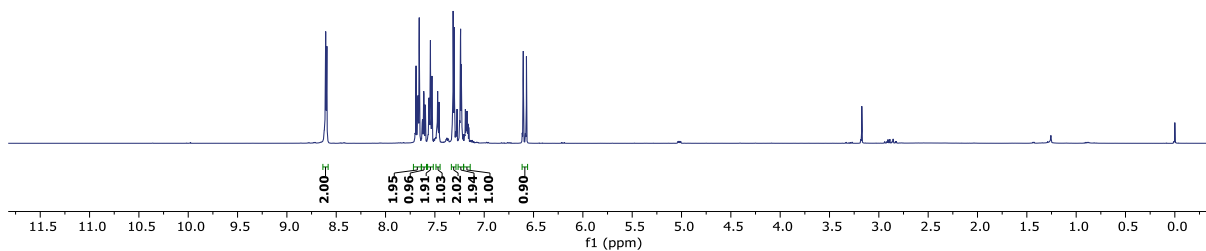

# <sup>13</sup>C NMR (125 MHz, CDCl<sub>3</sub>)

195.7839, 149.9198, 148.2659, 143.8163, 139.2190, 138.1725, 134.2728, 133.4277, 131.5760, 131.0867, 129.9455, 129.1533, 129.0687, 128.7269, 127.7748, 127.7119, 125.6855, 123.9598, 77.3529, 77.0986, 76.8448

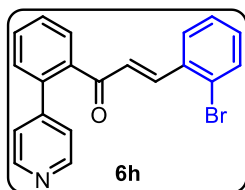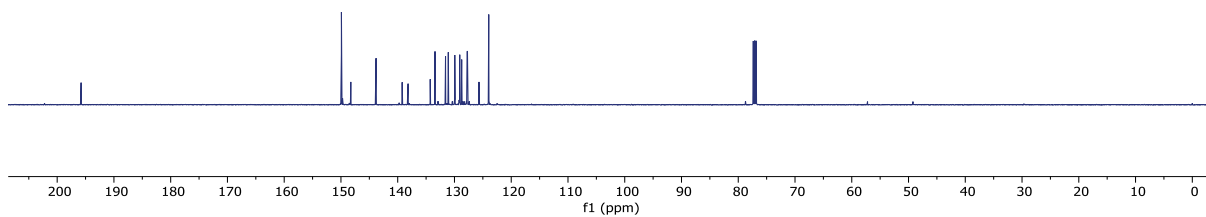

### <sup>1</sup>H NMR (400 MHz, CDCl<sub>3</sub>)

8.5951  
8.5828  
7.6615  
7.6436  
7.6068  
7.6038  
7.5917  
7.5888  
7.5766  
7.5736  
7.5412  
7.5236  
7.5086  
7.4838  
7.4823  
7.4608  
7.4480  
7.4453  
7.4331  
7.4319  
7.4299  
7.3615  
7.3596  
7.3575  
7.3515  
7.3495  
7.3474  
7.2927  
7.2806  
7.1719  
7.1617  
7.0118  
7.0045  
7.0016  
6.9944  
6.5223  
6.4910

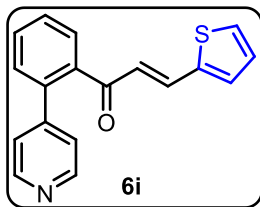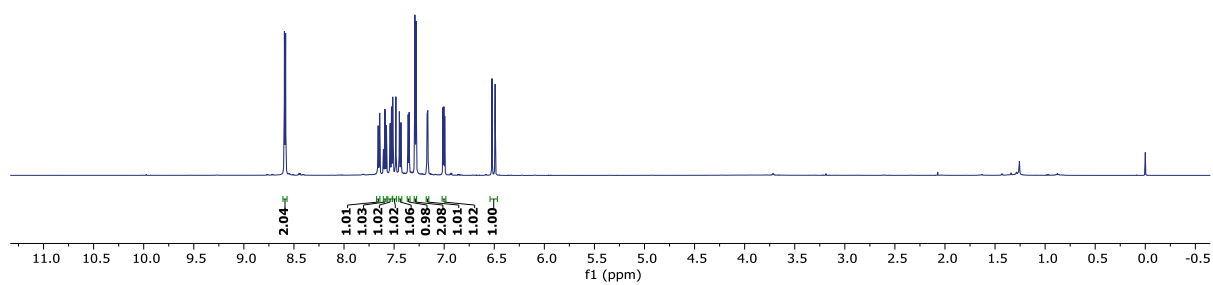

### <sup>13</sup>C NMR (125 MHz, CDCl<sub>3</sub>)

194.8175  
149.7783  
148.4309  
139.6641  
139.4803  
138.2190  
137.5516  
132.0354  
130.9483  
130.0588  
129.5709  
128.9033  
128.6553  
128.3716  
125.2816  
123.8288  
77.3652  
77.1103  
76.8570

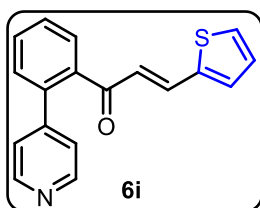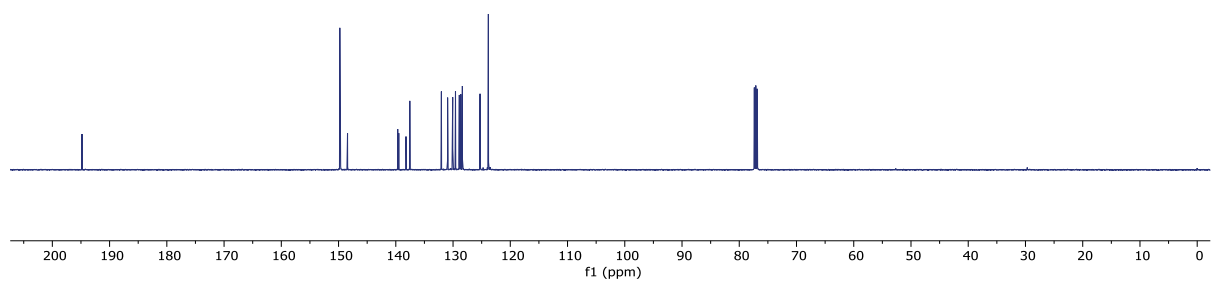

### <sup>1</sup>H NMR (400 MHz, CDCl<sub>3</sub>)

8.6123  
8.5952  
8.5913  
8.5842  
8.5799  
8.5736  
7.5687  
7.5554  
7.5507  
7.5376  
7.5327  
7.5185  
7.5141  
7.5042  
7.5008  
7.4869  
7.4840  
7.4645  
7.4167  
7.4134  
7.3976  
7.3946  
7.2833  
7.2545  
7.2512  
7.2437  
7.2398  
7.2327  
7.2284  
6.5816  
6.5644  
6.5471  
6.5423  
6.5249  
6.5076  
6.0927  
6.0888  
6.0850  
6.0531  
6.0494  
6.0457  
2.0461  
2.0424  
2.0283  
2.0246  
2.0100  
2.0063  
1.9920  
1.9882  
1.3204  
1.3020  
1.2837  
1.2652  
1.2470  
1.2286  
0.7945  
0.7761  
0.7576

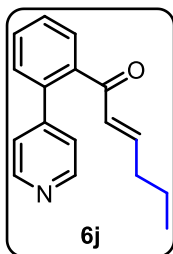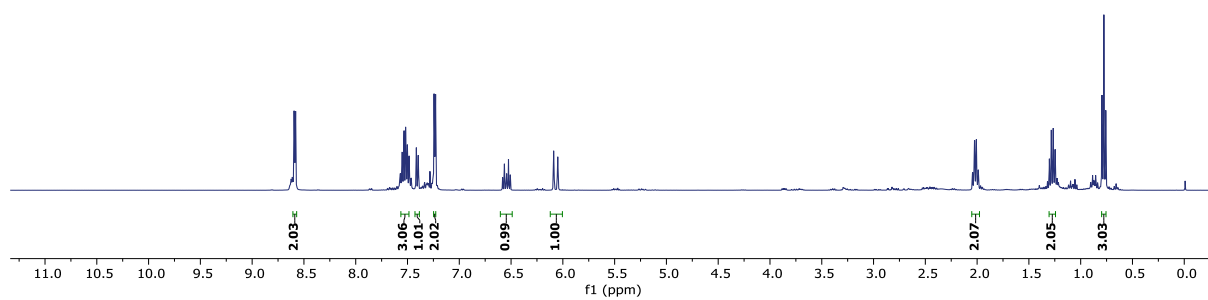

### <sup>13</sup>C NMR (100 MHz, CDCl<sub>3</sub>)

196.6996  
151.5850  
149.8287  
148.3373  
139.5061  
137.8111  
130.8524  
130.6017  
129.7359  
128.7550  
128.5532  
123.7968  
123.7531  
77.4208  
77.1028  
76.7846  
34.5057  
21.0828  
13.5881

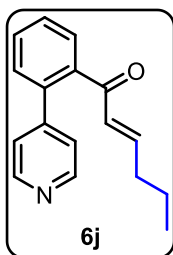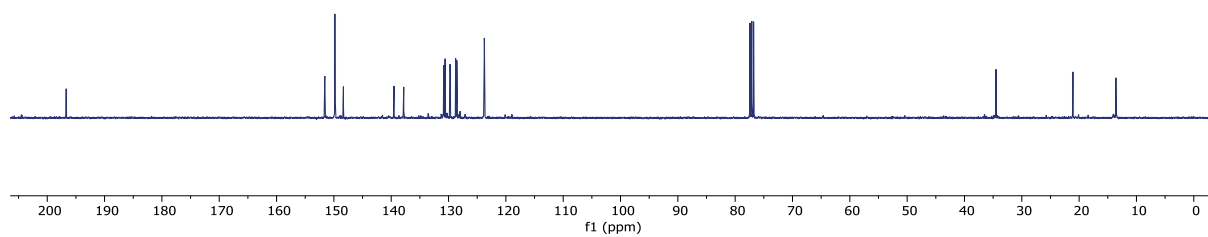

# <sup>1</sup>H NMR (400 MHz, CDCl<sub>3</sub>)

8.7048  
8.7007  
8.6838  
8.6897  
8.0501  
8.0389  
8.0107  
8.0070  
7.9904  
7.9870  
7.7212  
7.7001  
7.6602  
7.6568  
7.6513  
7.6378  
7.6336  
7.6307  
7.6136  
7.5510  
7.5476  
7.5305  
7.3729  
7.3687  
7.3621  
7.3577  
7.3490  
7.3086  
7.2839  
6.7669  
6.7267

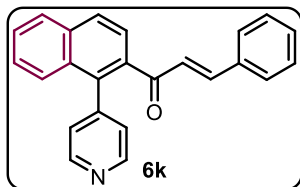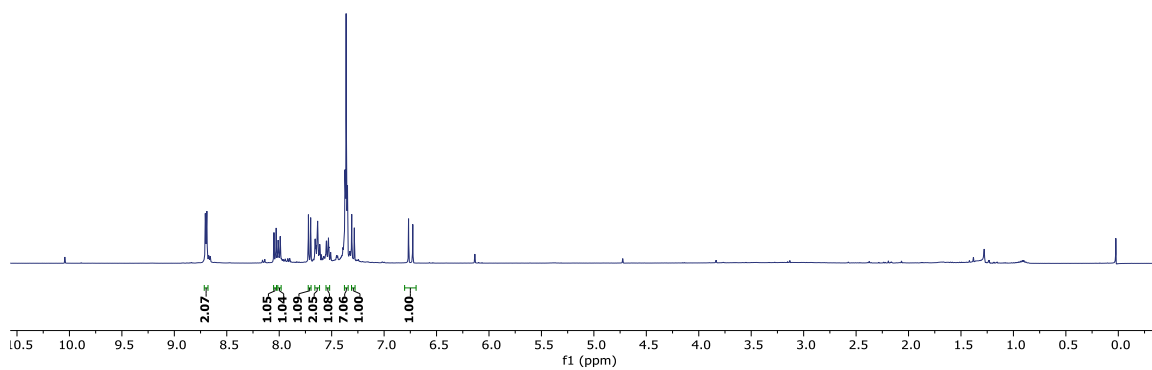

# <sup>13</sup>C NMR (100 MHz, CDCl<sub>3</sub>)

196.2766  
149.5678  
146.0360  
137.0490  
135.4674  
134.2263  
134.2122  
131.1252  
130.8498  
128.9738  
128.8912  
128.6216  
128.3839  
128.3883  
127.4579  
127.4131  
126.8038  
126.3864  
125.7745  
124.5830  
77.3731  
77.0551  
76.7361

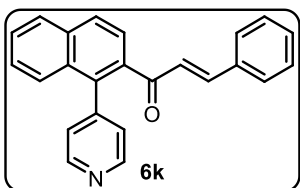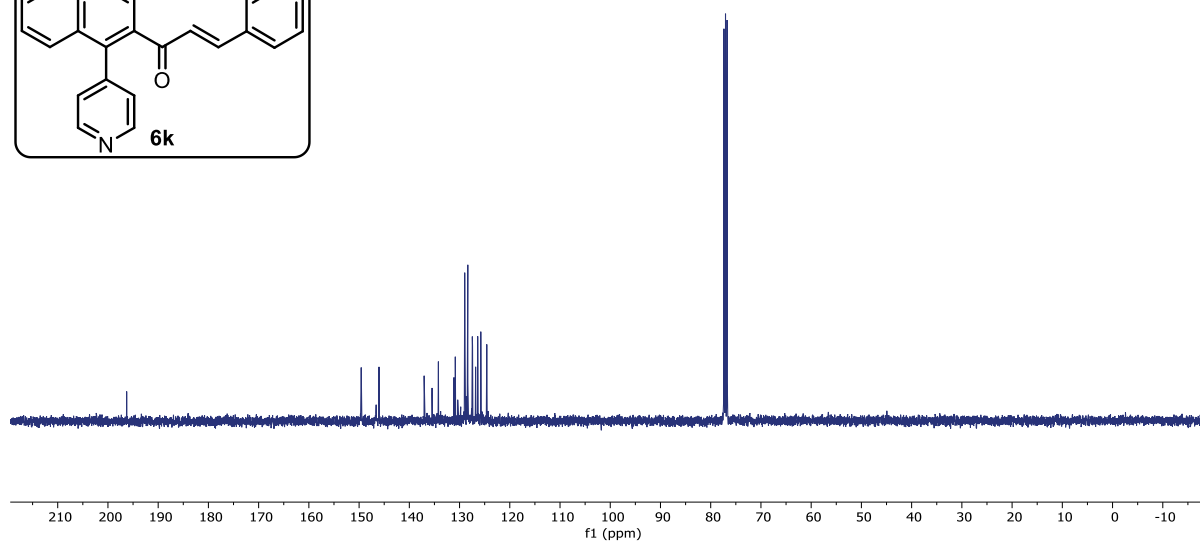

# <sup>1</sup>H NMR (500 MHz, CDCl<sub>3</sub>)

8.5959  
8.5925  
8.5871  
8.5838  
7.4477  
7.4463  
7.4420  
7.4364  
7.4352  
7.4325  
7.4307  
7.4249  
7.4112  
7.4094  
7.3784  
7.3763  
7.3716  
7.3691  
7.3648  
7.3624  
7.3592  
7.3575  
7.3530  
7.3430  
7.3385  
7.3079  
7.2757  
7.2605  
7.1681  
7.1648  
7.1593  
7.1560  
6.7183  
6.6862

-2.1834

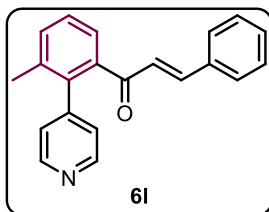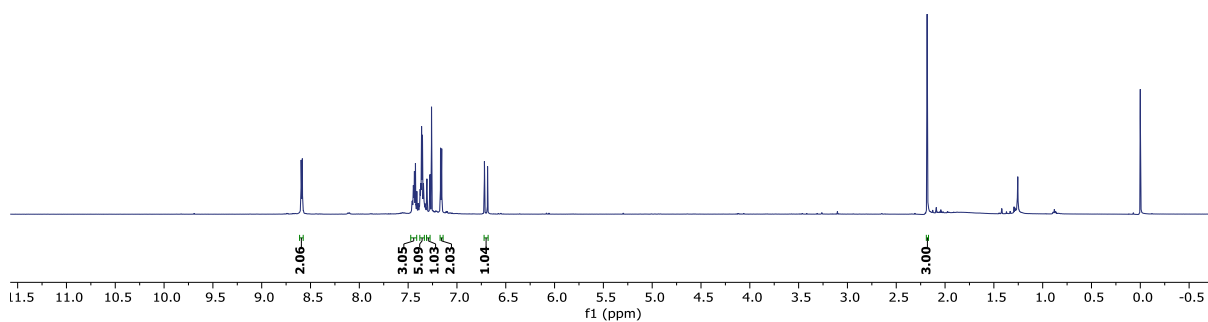

# <sup>13</sup>C NMR (125 MHz, CDCl<sub>3</sub>)

195.9321

149.6039  
147.7723  
145.7409  
140.0194  
137.1657  
136.2988  
134.3176  
132.4788  
130.7355  
128.9425  
128.3267  
128.0808  
126.7669  
125.7860  
124.7318

77.2763  
77.0202  
76.7678

20.4385

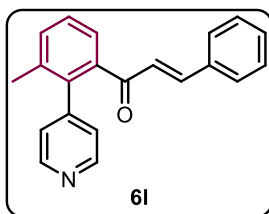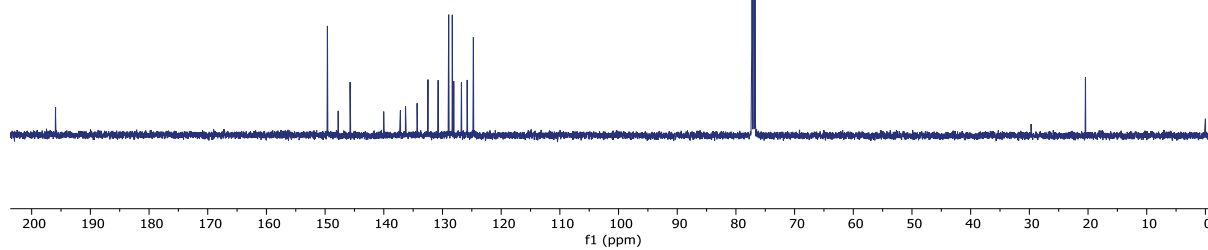

# <sup>1</sup>H NMR (400 MHz, CDCl<sub>3</sub>)

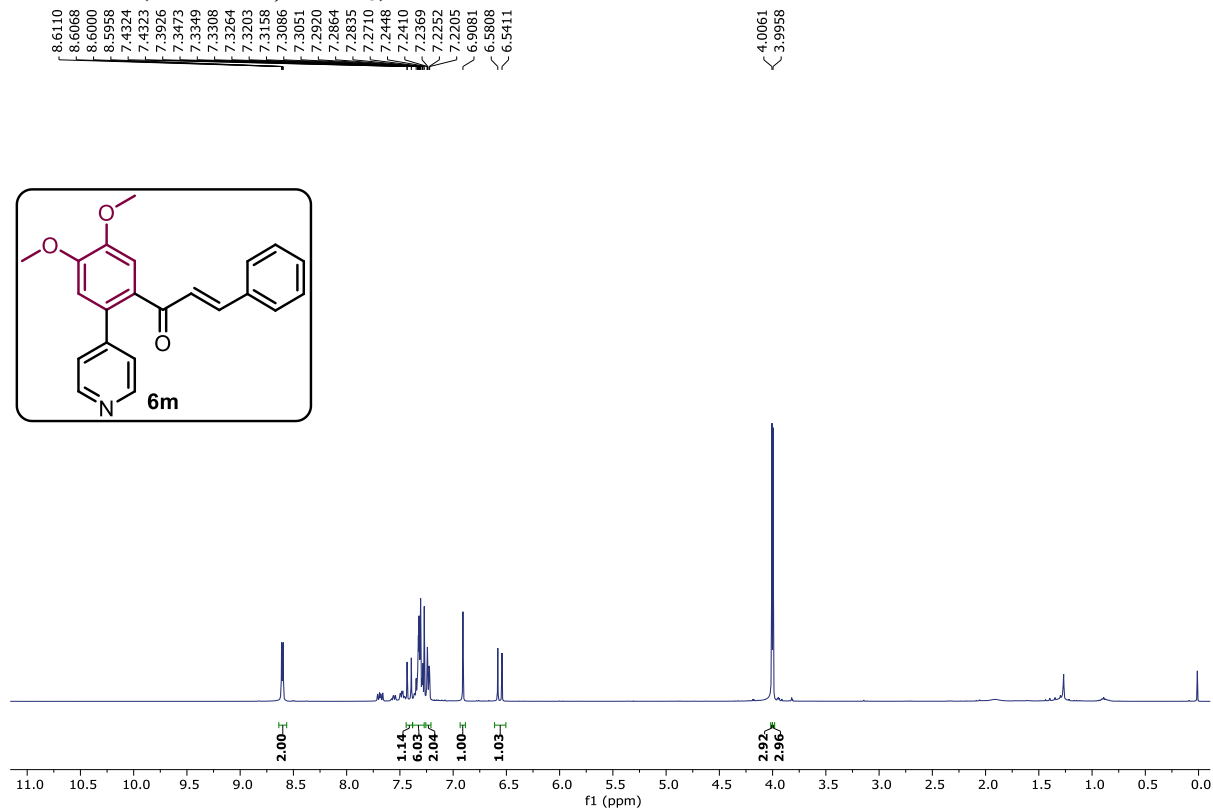

# <sup>13</sup>C NMR (100 MHz, CDCl<sub>3</sub>)

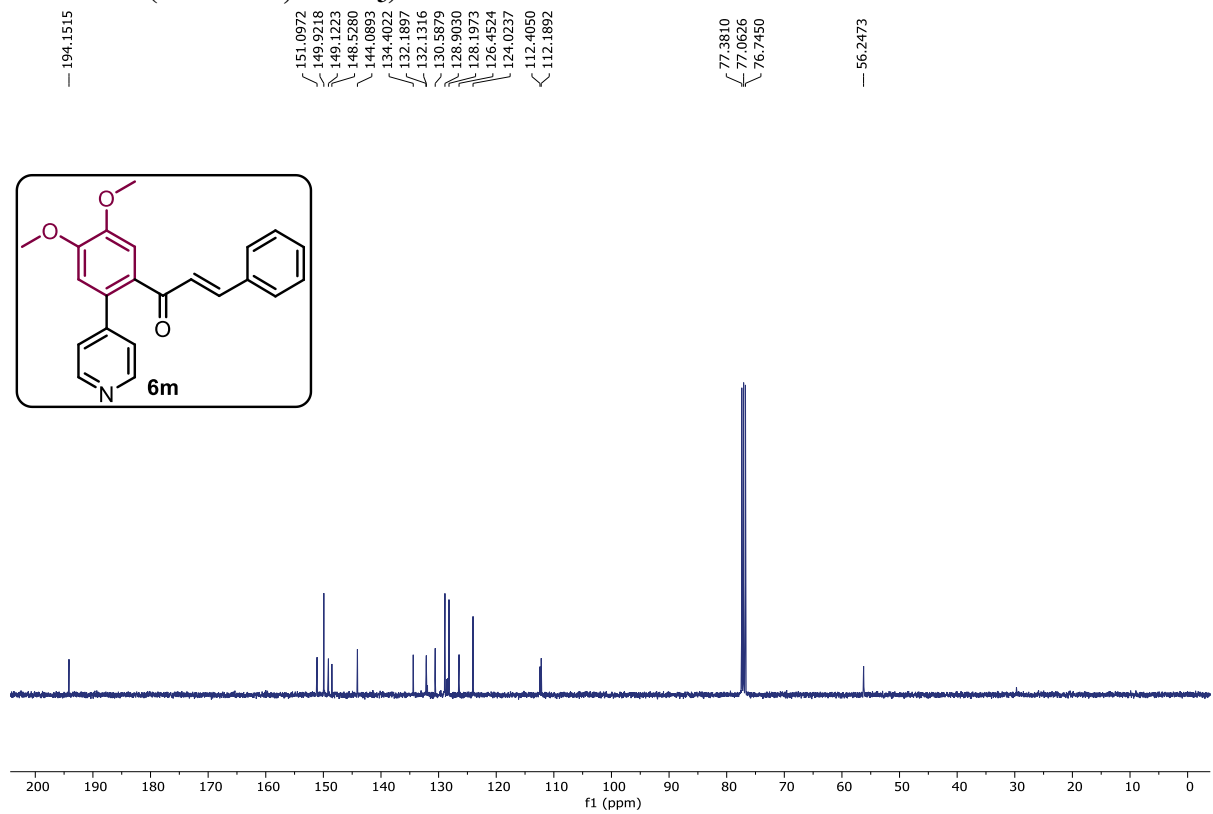

### <sup>1</sup>H NMR (400 MHz, CDCl<sub>3</sub>)

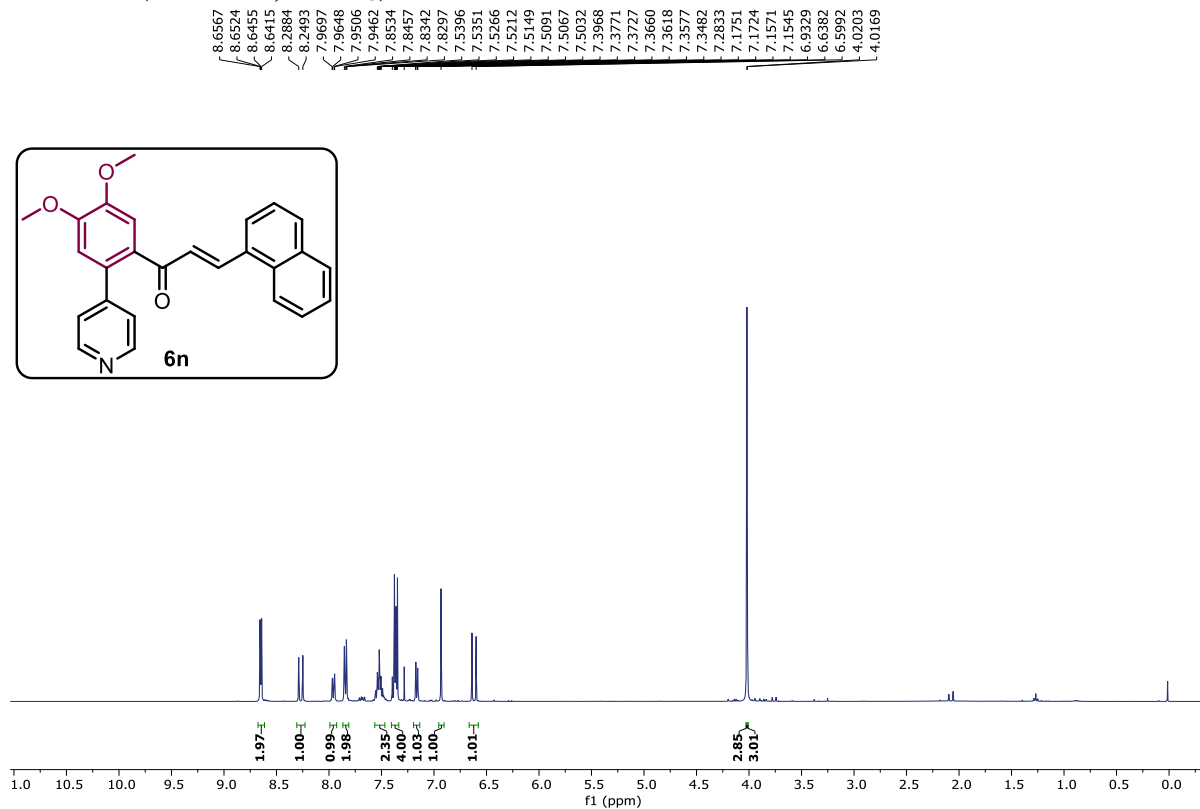

### <sup>13</sup>C NMR (100 MHz, CDCl<sub>3</sub>)

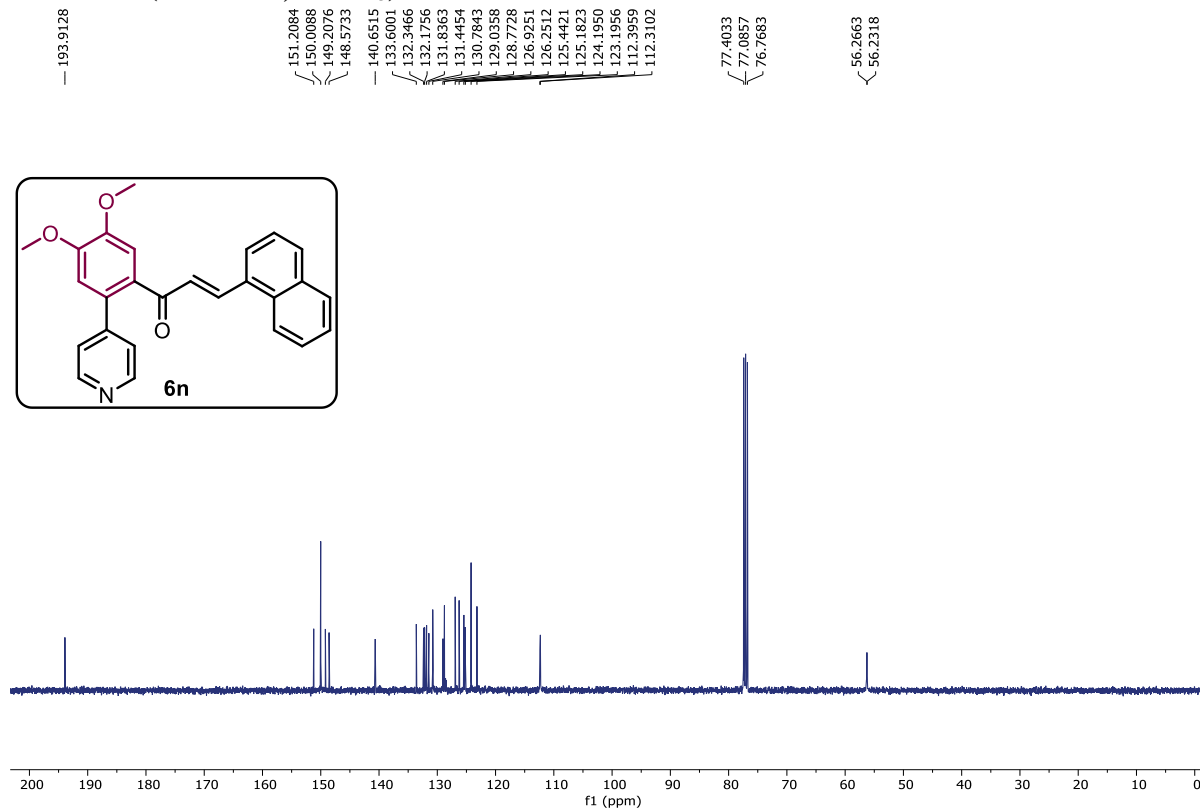



### <sup>1</sup>H NMR (400 MHz, CDCl<sub>3</sub>)

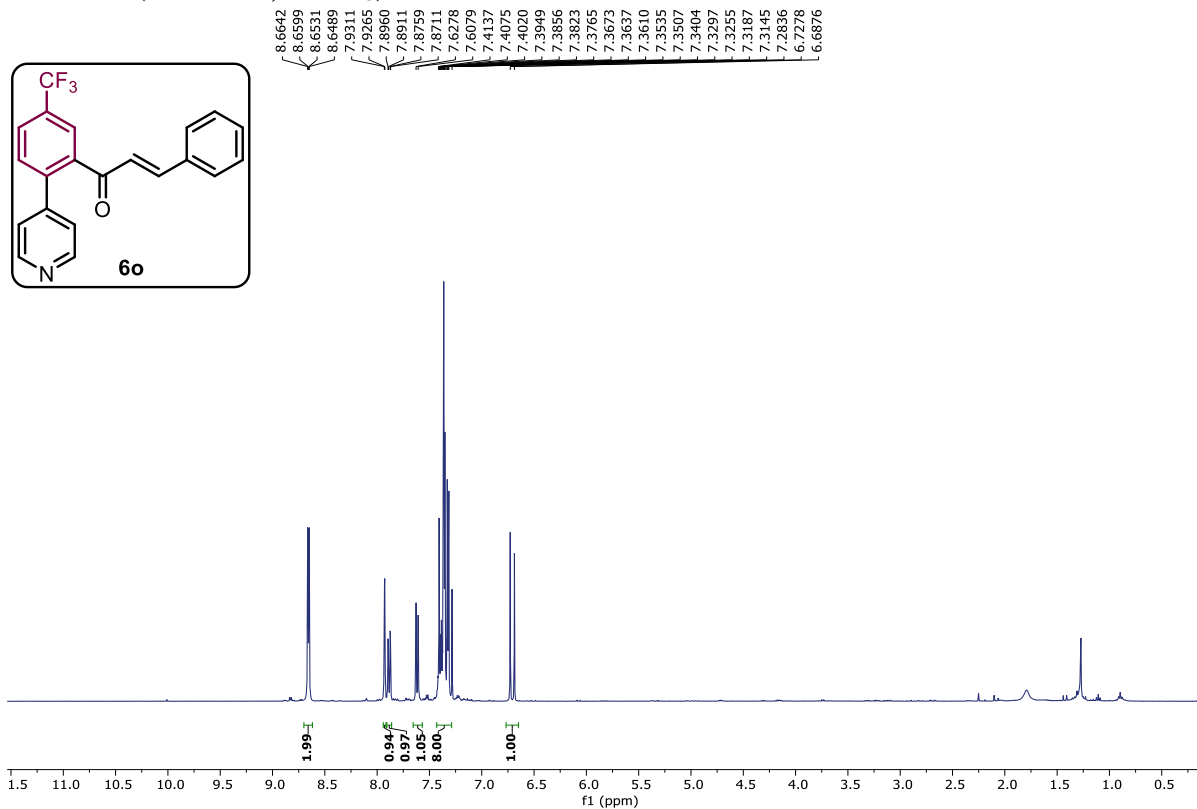

### <sup>13</sup>C NMR (100 MHz, CDCl<sub>3</sub>)

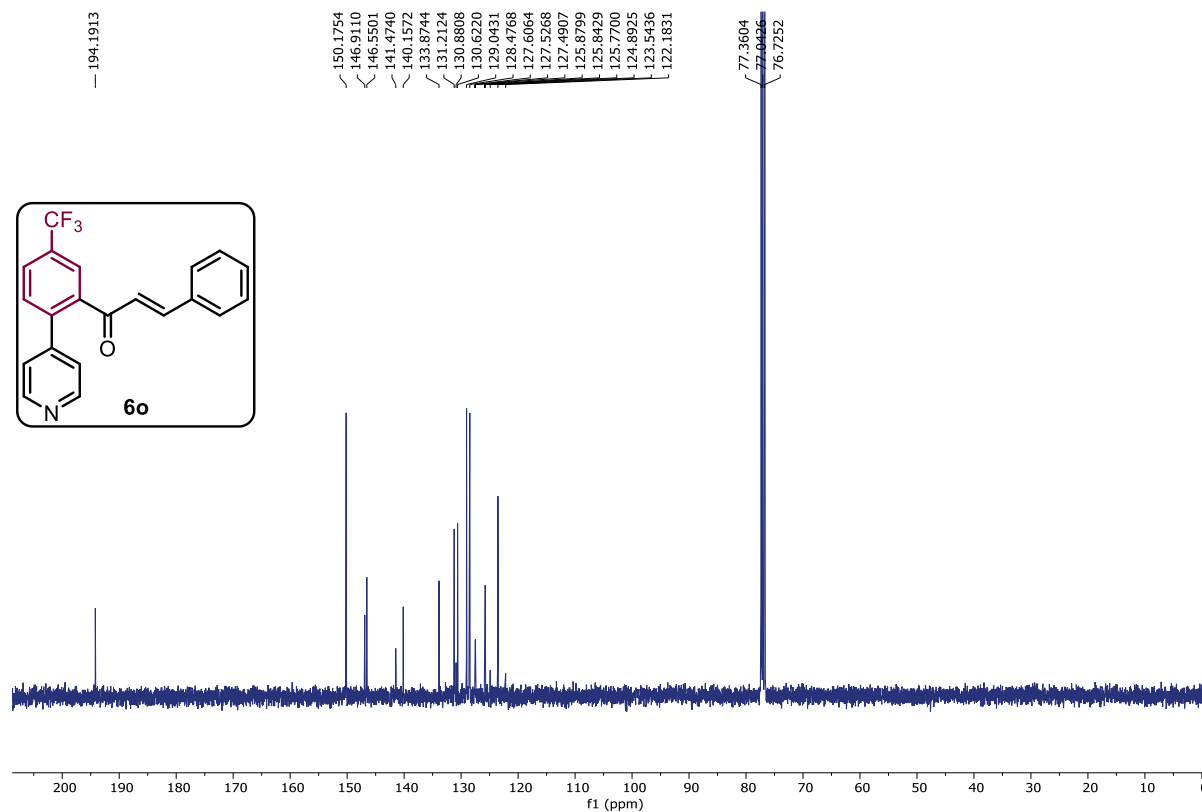

**$^{19}\text{F}$  NMR (376 MHz,  $\text{CDCl}_3$ )**

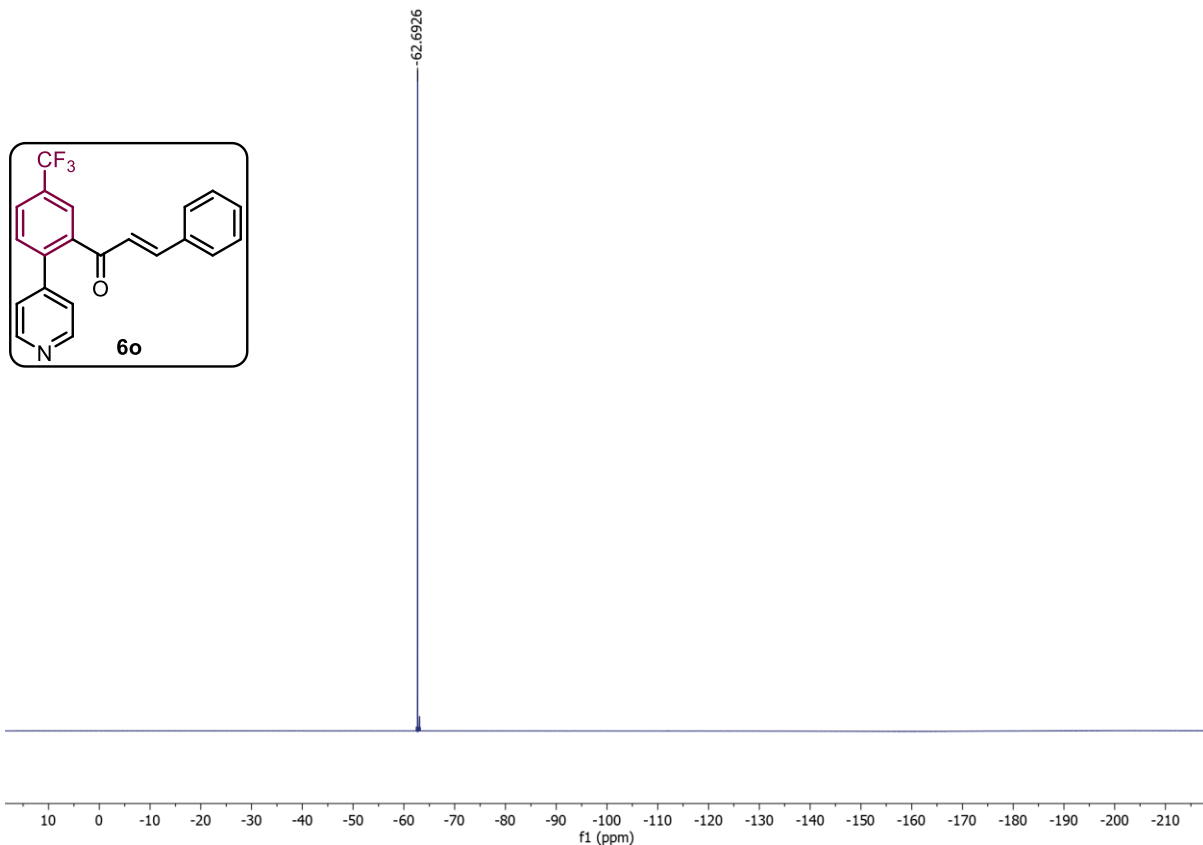

**$^1\text{H}$  NMR (500 MHz,  $\text{CDCl}_3$ )**

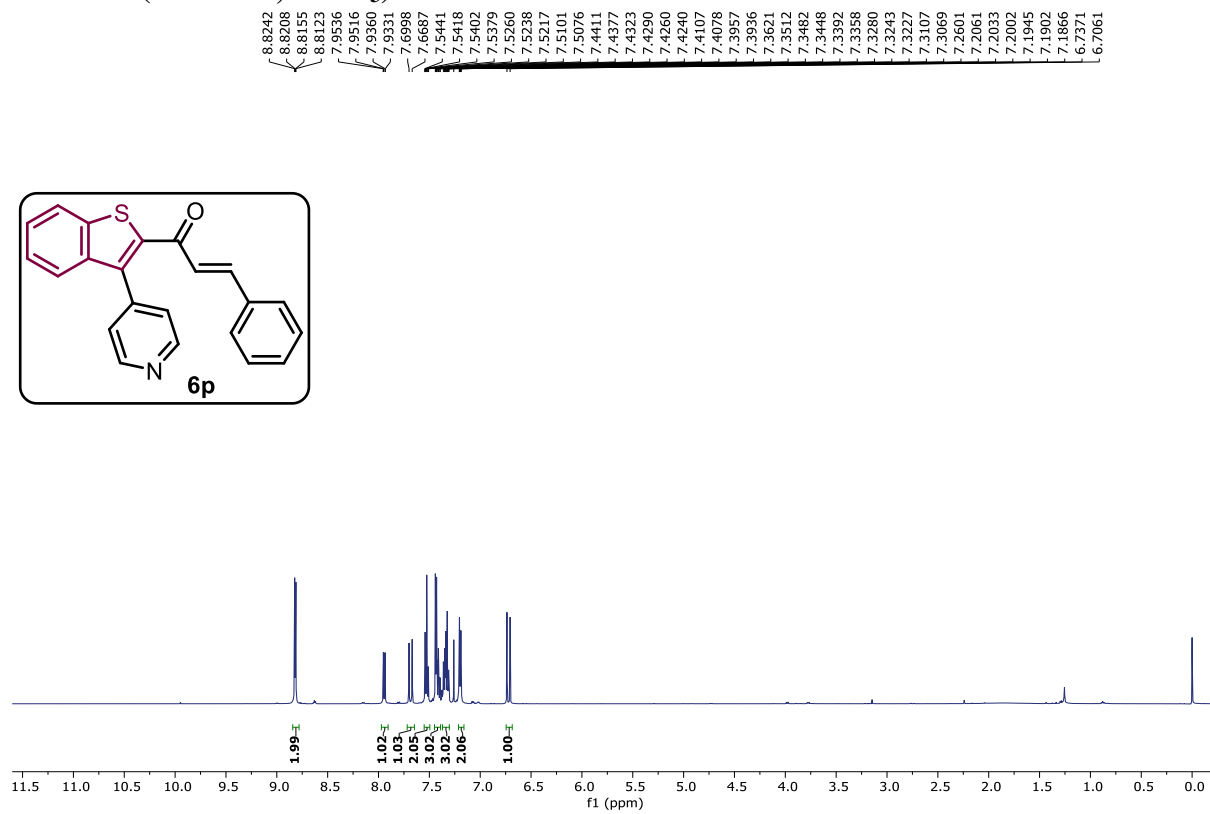

### $^{13}\text{C}$ NMR (125 MHz, $\text{CDCl}_3$ )

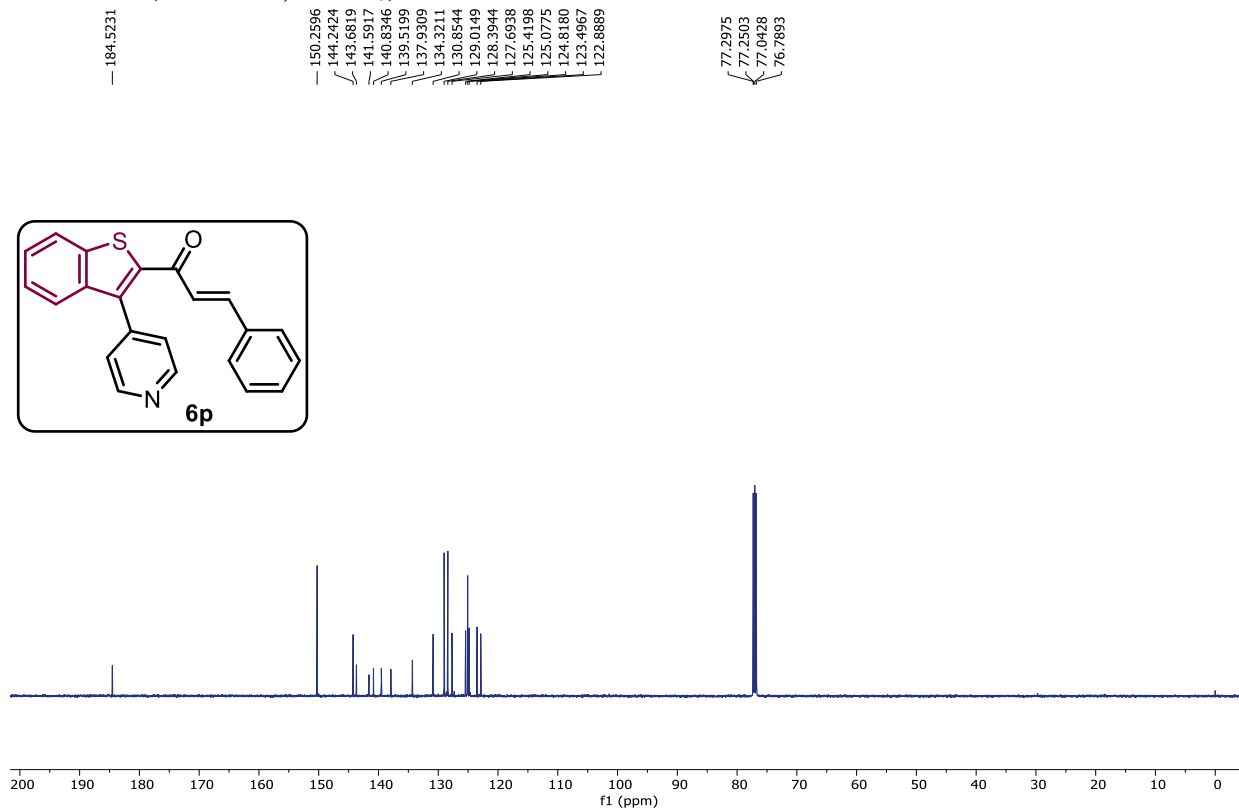

### $^1\text{H}$ NMR (500 MHz, $\text{CDCl}_3$ )

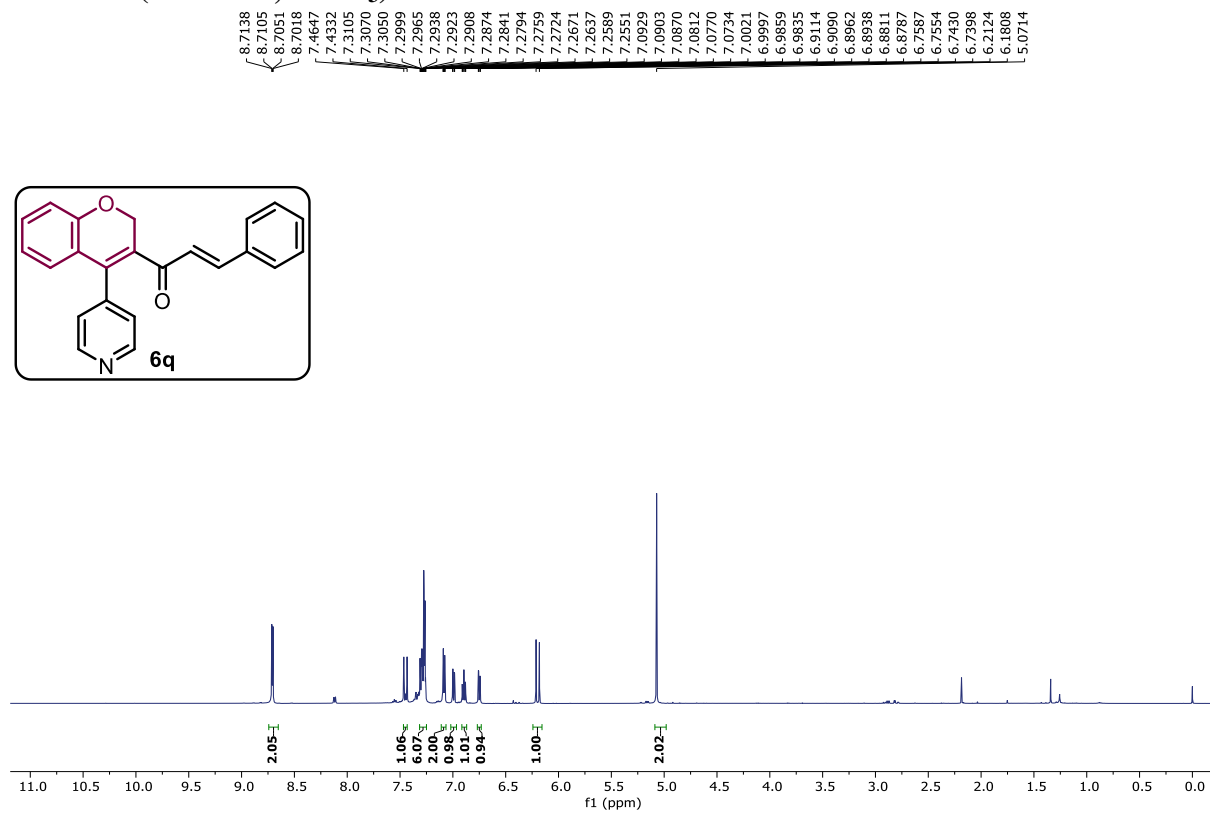

### $^{13}\text{C}$ NMR (125 MHz, $\text{CDCl}_3$ )

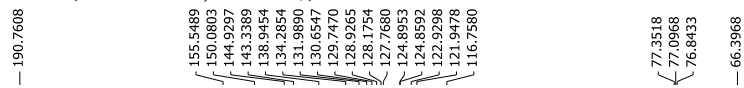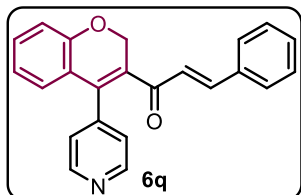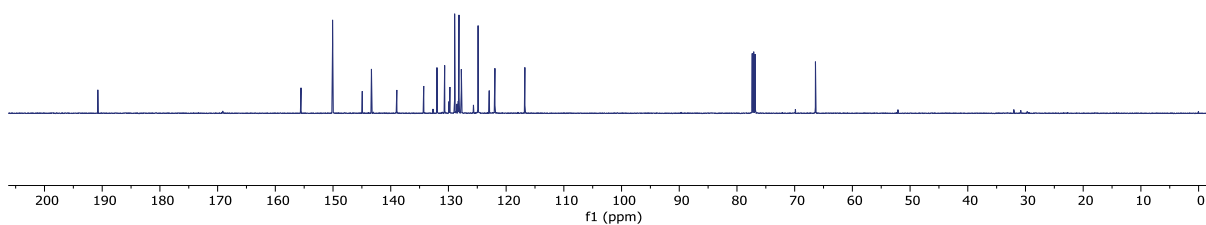

### $^1\text{H}$ NMR (500 MHz, $\text{CDCl}_3$ )

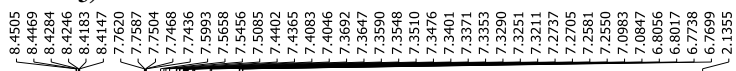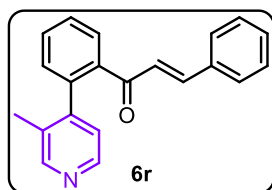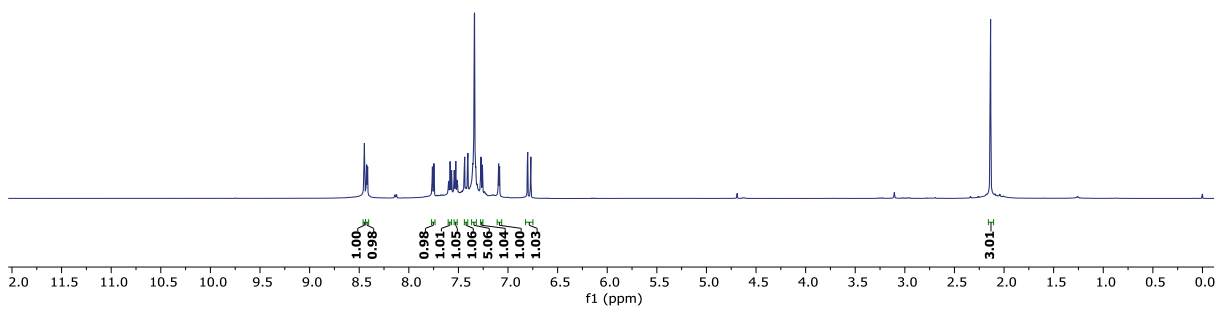

### <sup>13</sup>C NMR (125 MHz, CDCl<sub>3</sub>)

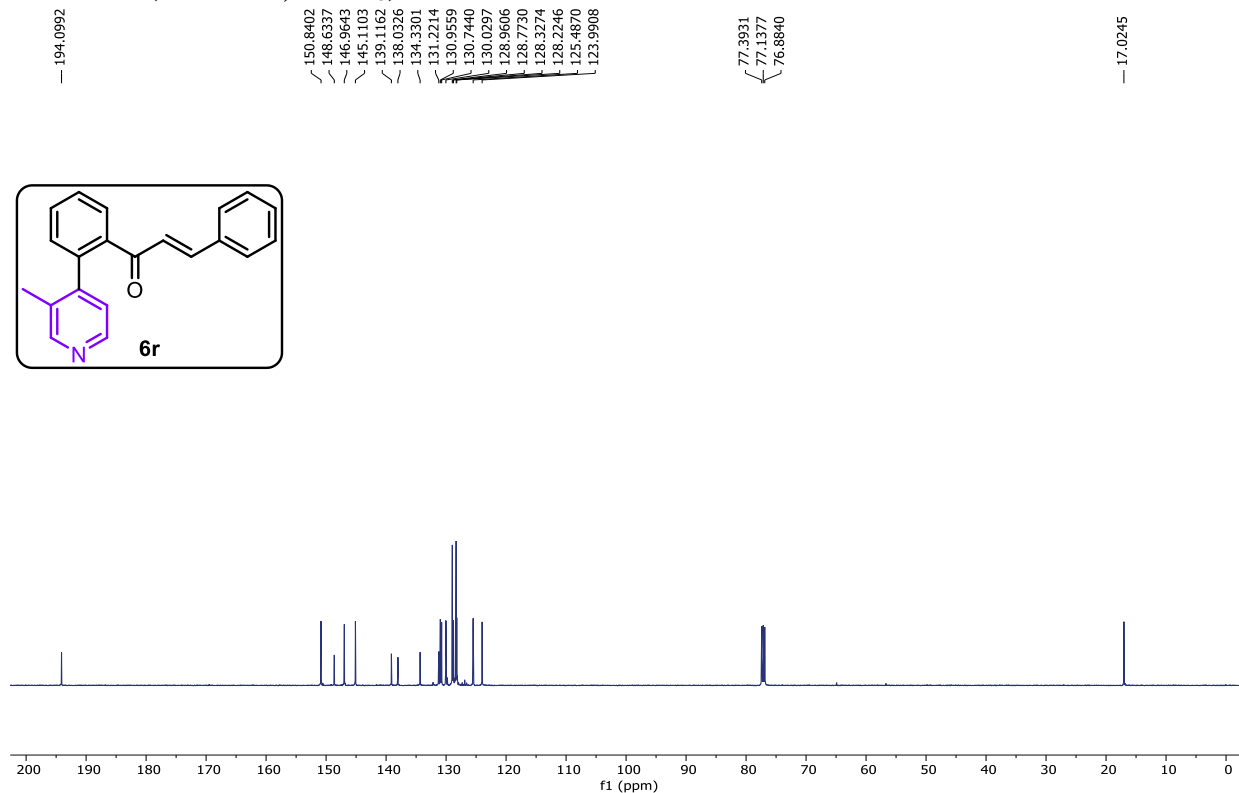

### <sup>1</sup>H NMR (500 MHz, CDCl<sub>3</sub>)

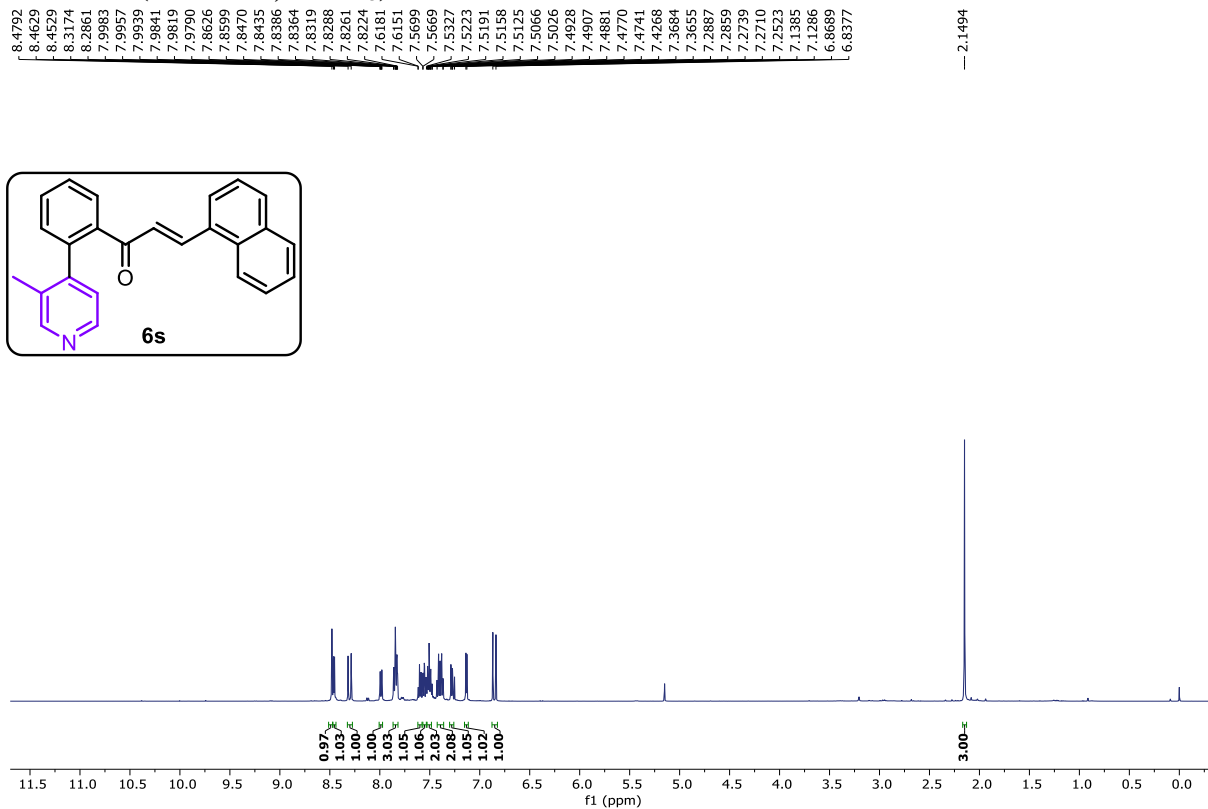

### $^{13}\text{C}$ NMR (125 MHz, $\text{CDCl}_3$ )

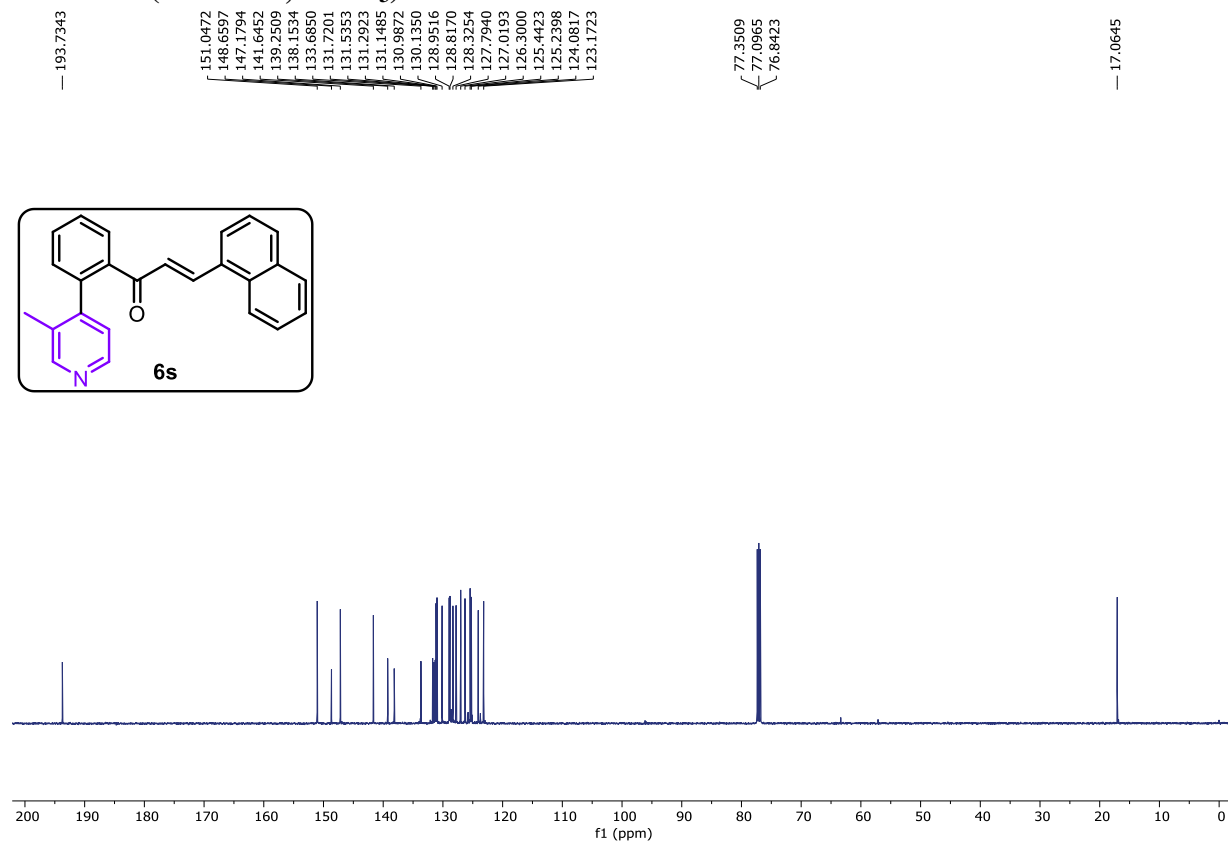

### $^1\text{H}$ NMR (400 MHz, $\text{CDCl}_3$ )

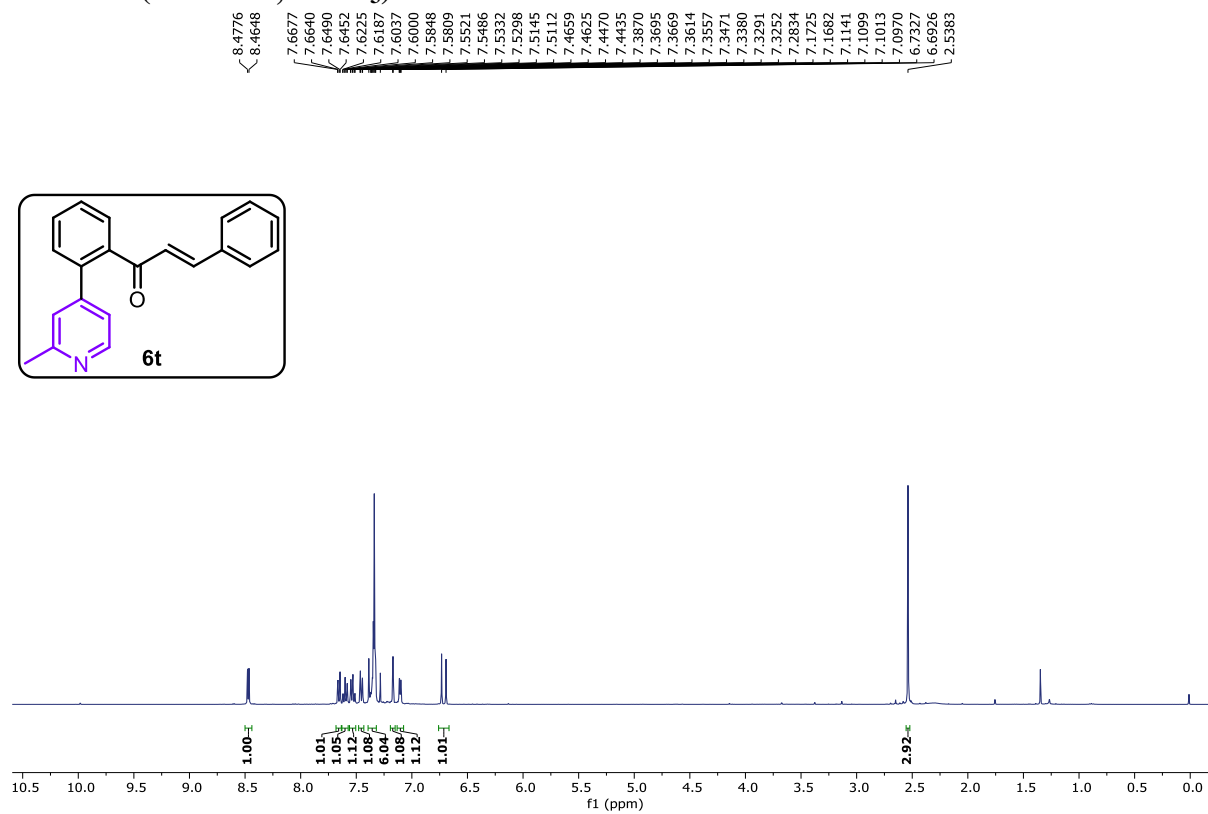

### $^{13}\text{C}$ NMR (100 MHz, $\text{CDCl}_3$ )

195.8861  
158.6352  
149.2042  
148.6863  
145.4313  
139.4885  
138.4859  
134.2861  
130.8886  
130.7675  
129.9582  
128.9417  
128.8988  
128.5119  
128.3073  
126.6303  
123.3884  
120.9632

77.4251  
77.1064  
76.7885

24.4504

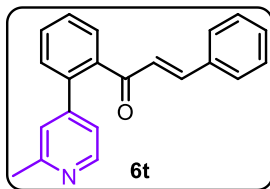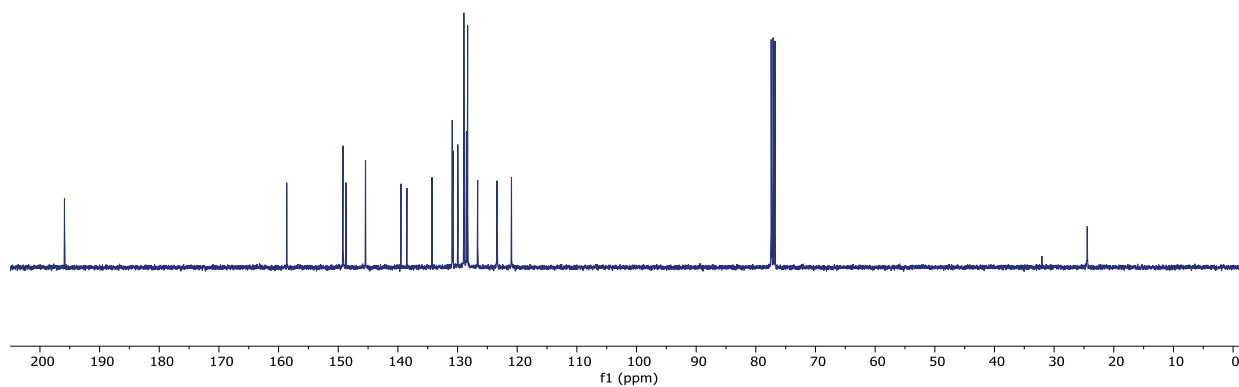

### $^1\text{H}$ NMR (400 MHz, $\text{CDCl}_3$ )

8.6344  
8.6217  
7.6431  
7.6391  
7.6245  
7.6204  
7.5759  
7.5719  
7.5574  
7.5533  
7.5391  
7.5346  
7.5241  
7.5202  
7.5094  
7.5018  
7.4868  
7.4831  
7.4011  
7.3974  
7.3829  
7.3792  
7.2885  
7.2837  
7.2772  
7.2732  
6.0326

2.0914

1.7430

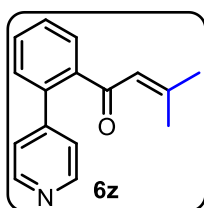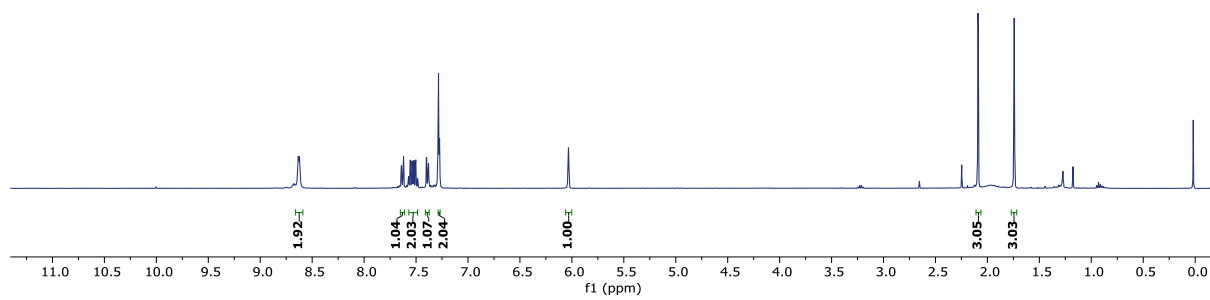



### $^{13}\text{C}$ NMR (100 MHz, $\text{CDCl}_3$ )

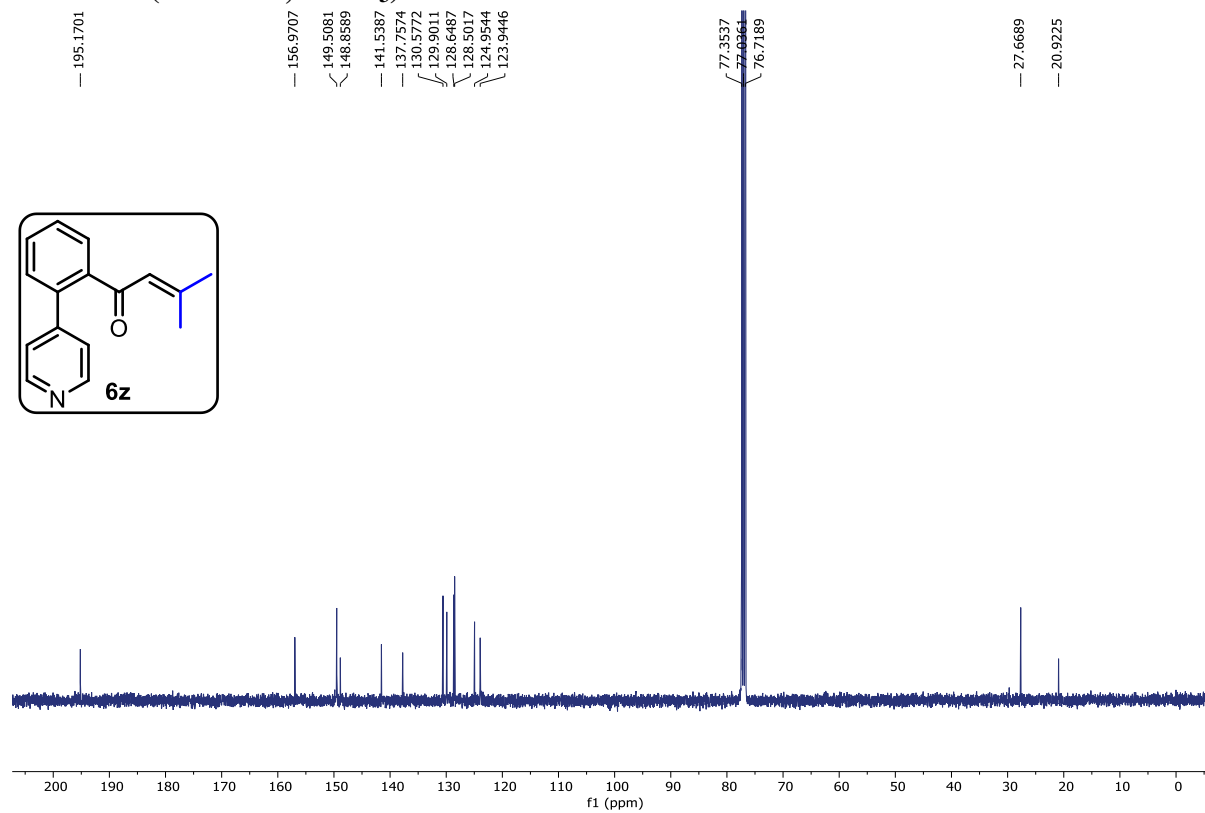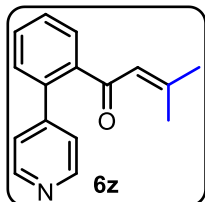

### $^1\text{H}$ NMR (400 MHz, $\text{CDCl}_3$ )

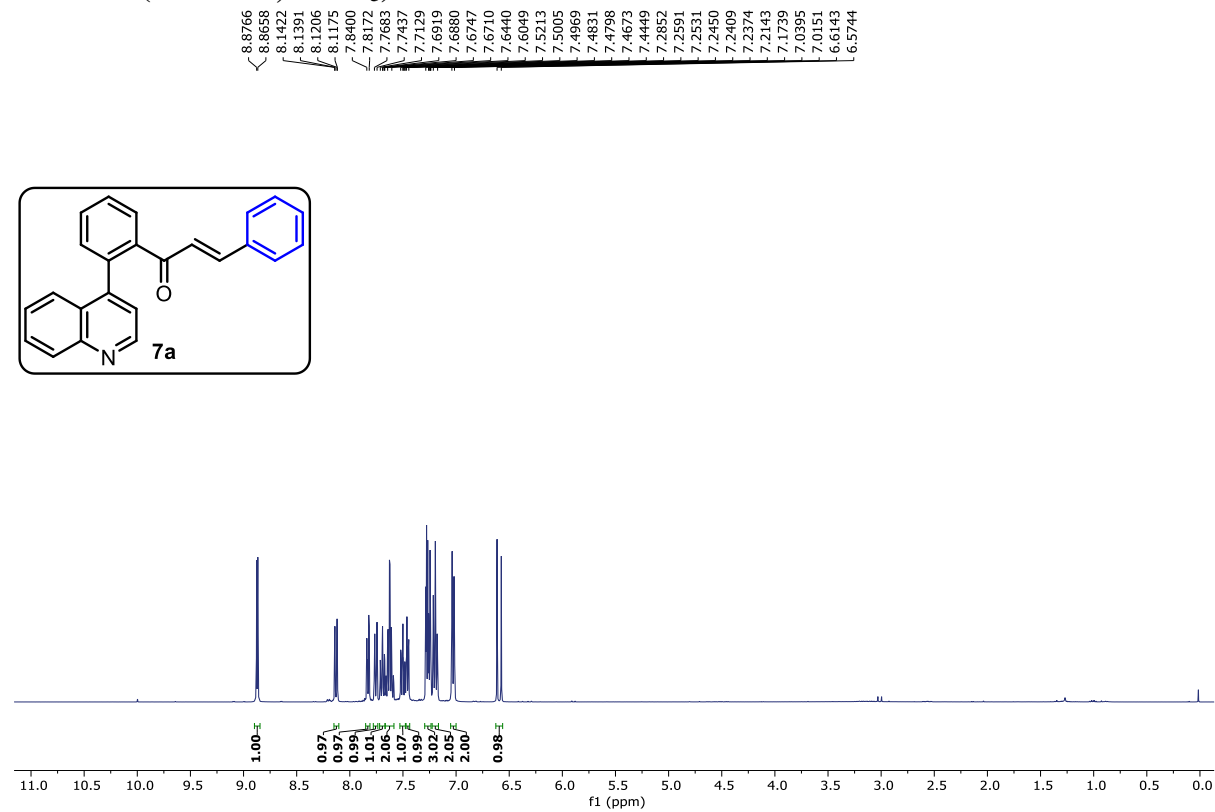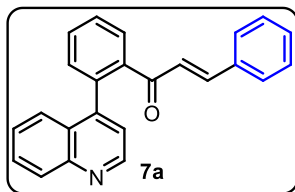

### $^{13}\text{C}$ NMR (100 MHz, $\text{CDCl}_3$ )

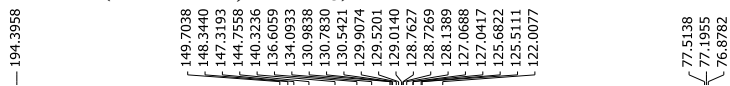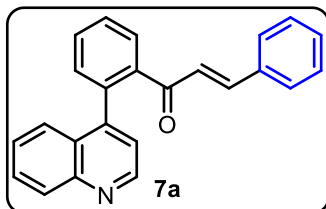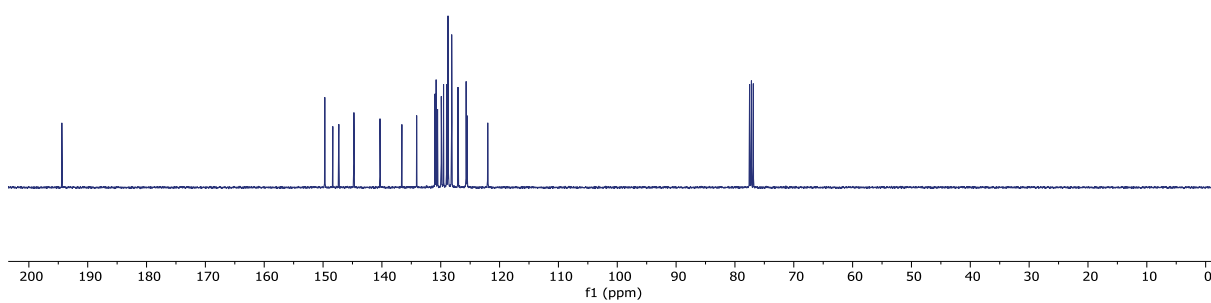

### $^1\text{H}$ NMR (400 MHz, $\text{CDCl}_3$ )

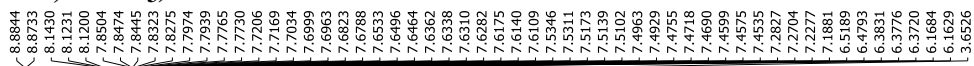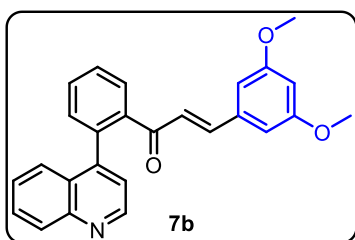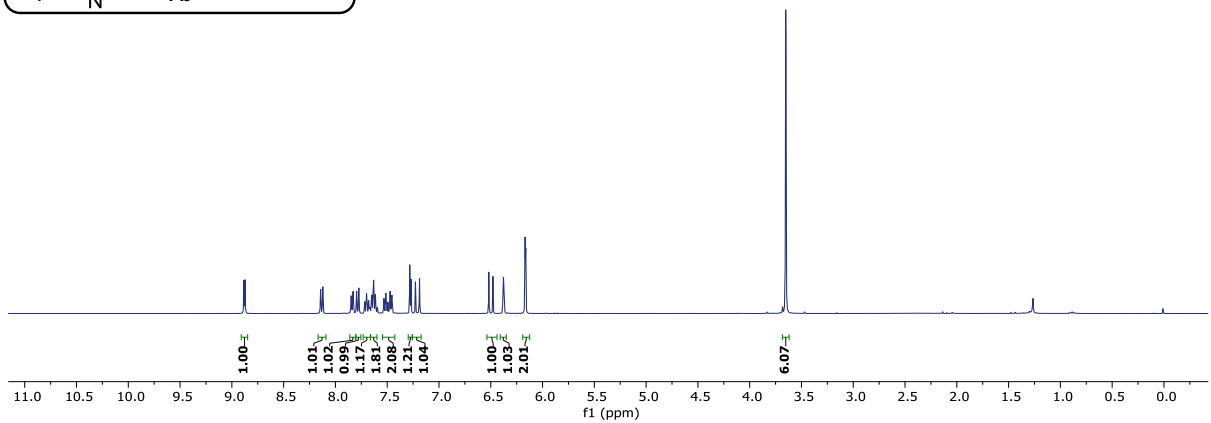

### $^{13}\text{C}$ NMR (100 MHz, $\text{CDCl}_3$ )

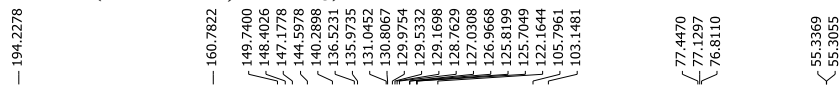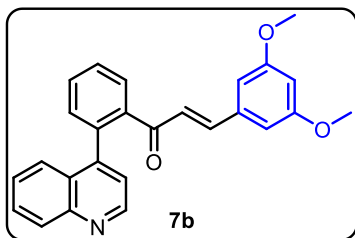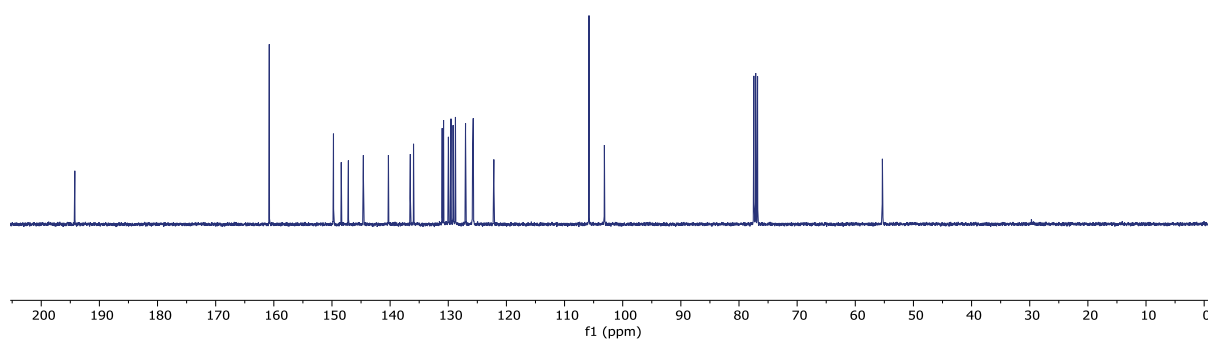

### $^1\text{H}$ NMR (400 MHz, $\text{CDCl}_3$ )

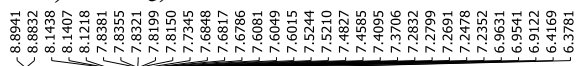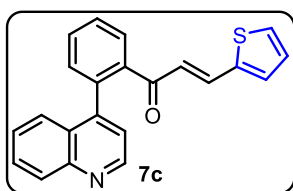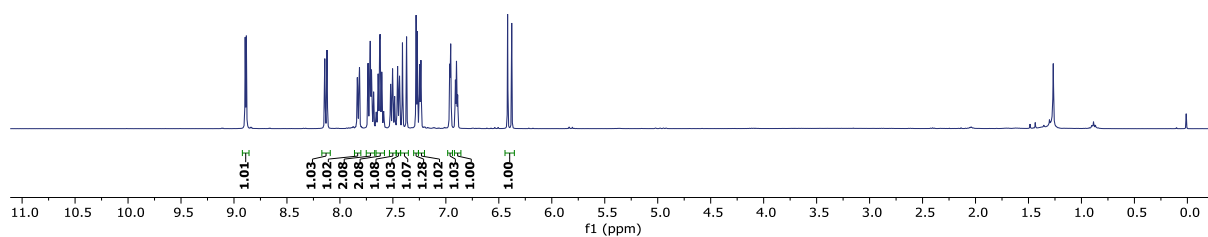

### <sup>13</sup>C NMR (100 MHz, CDCl<sub>3</sub>)

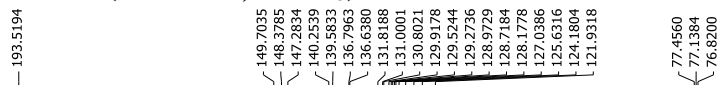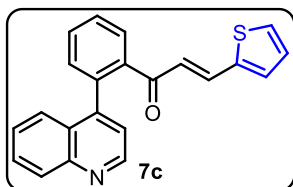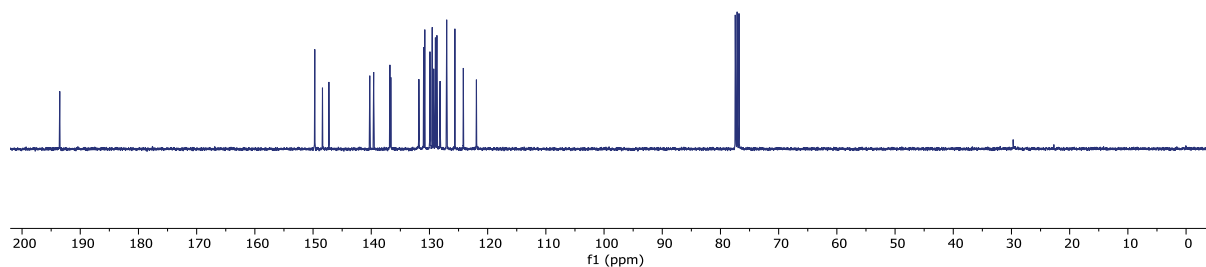

### <sup>1</sup>H NMR (400 MHz, CDCl<sub>3</sub>)

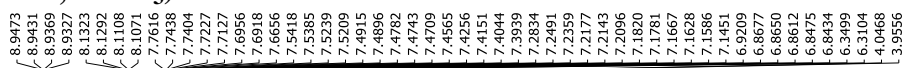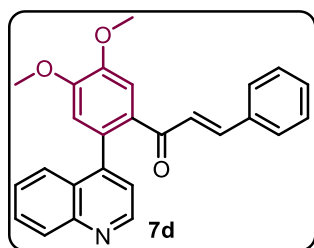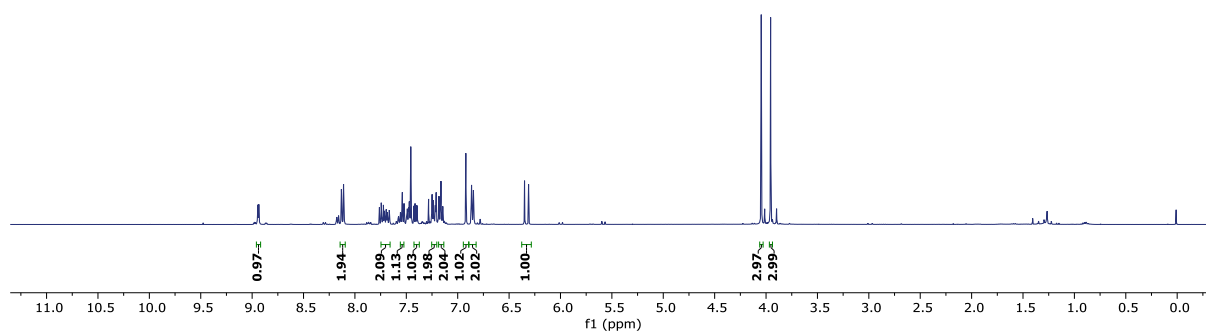

### $^{13}\text{C}$ NMR (100 MHz, $\text{CDCl}_3$ )

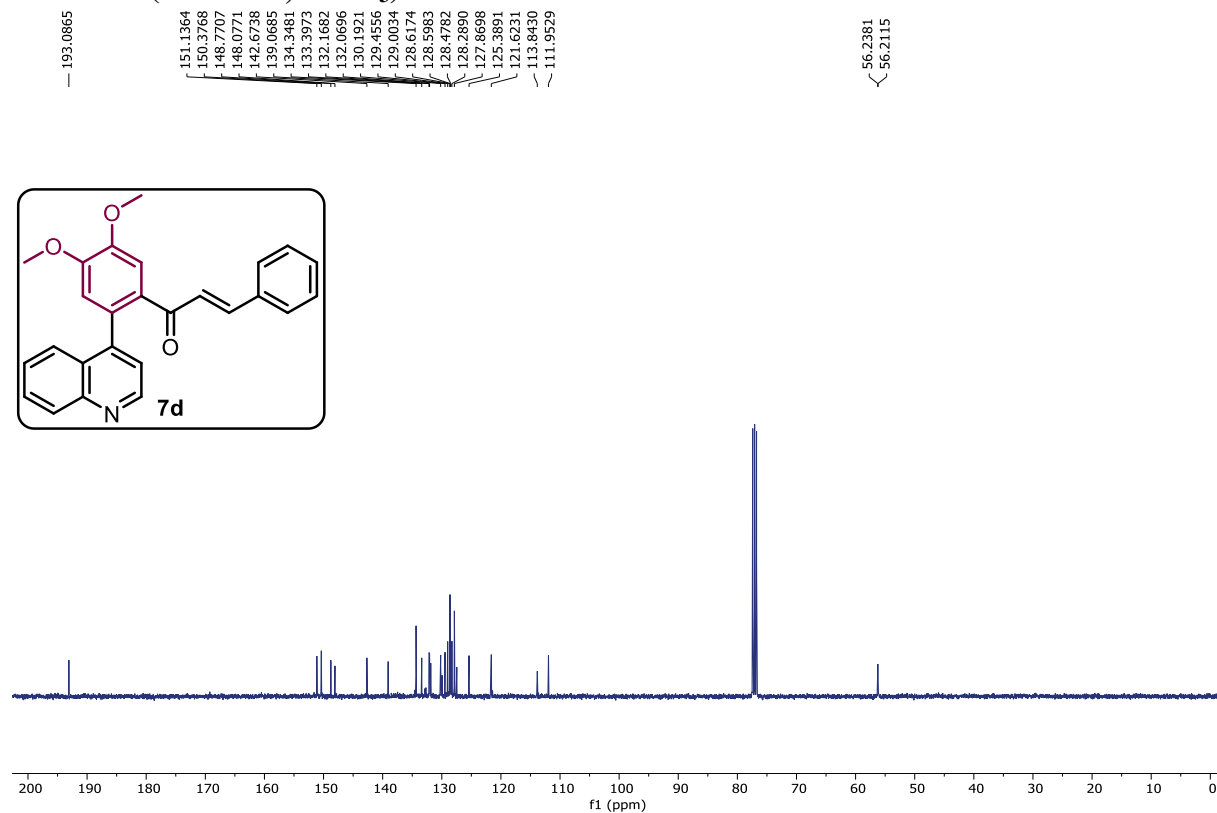

### $^1\text{H}$ NMR (400 MHz, $\text{CDCl}_3$ )

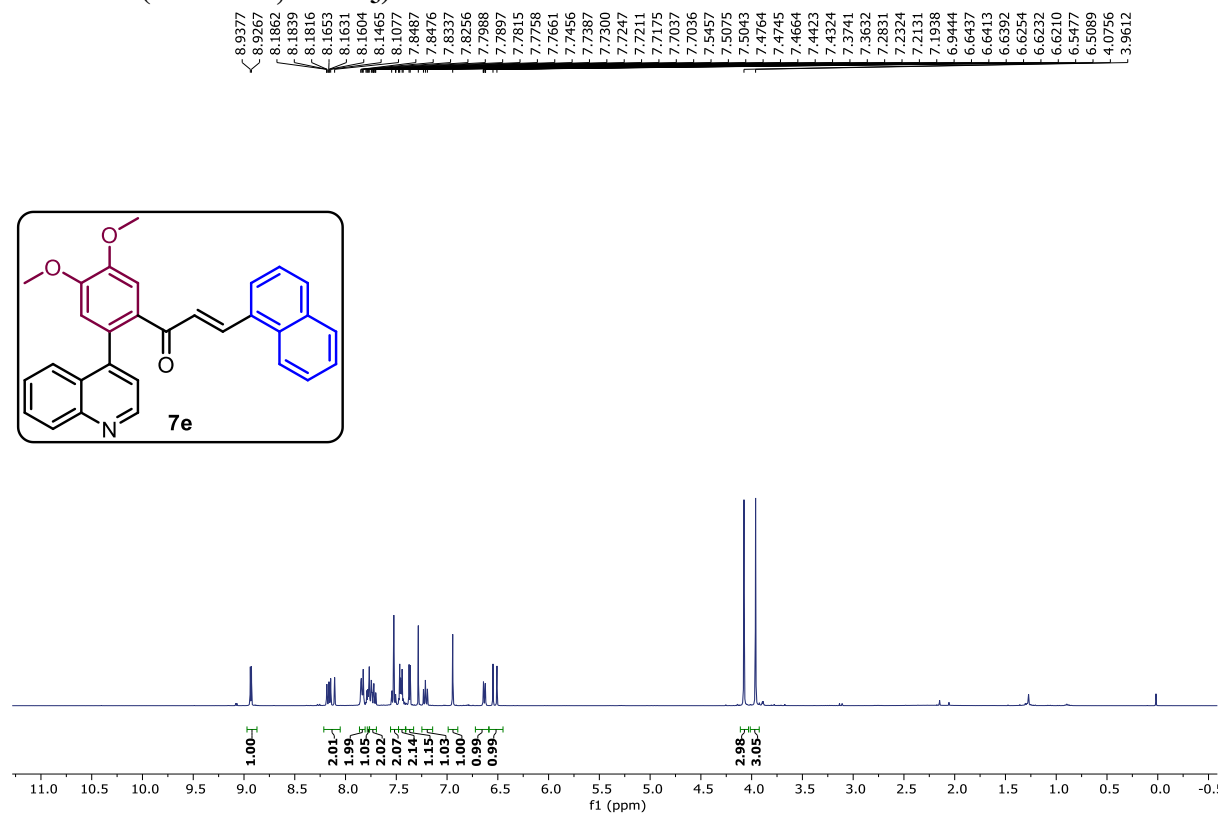

### $^{13}\text{C}$ NMR (100 MHz, $\text{CDCl}_3$ )

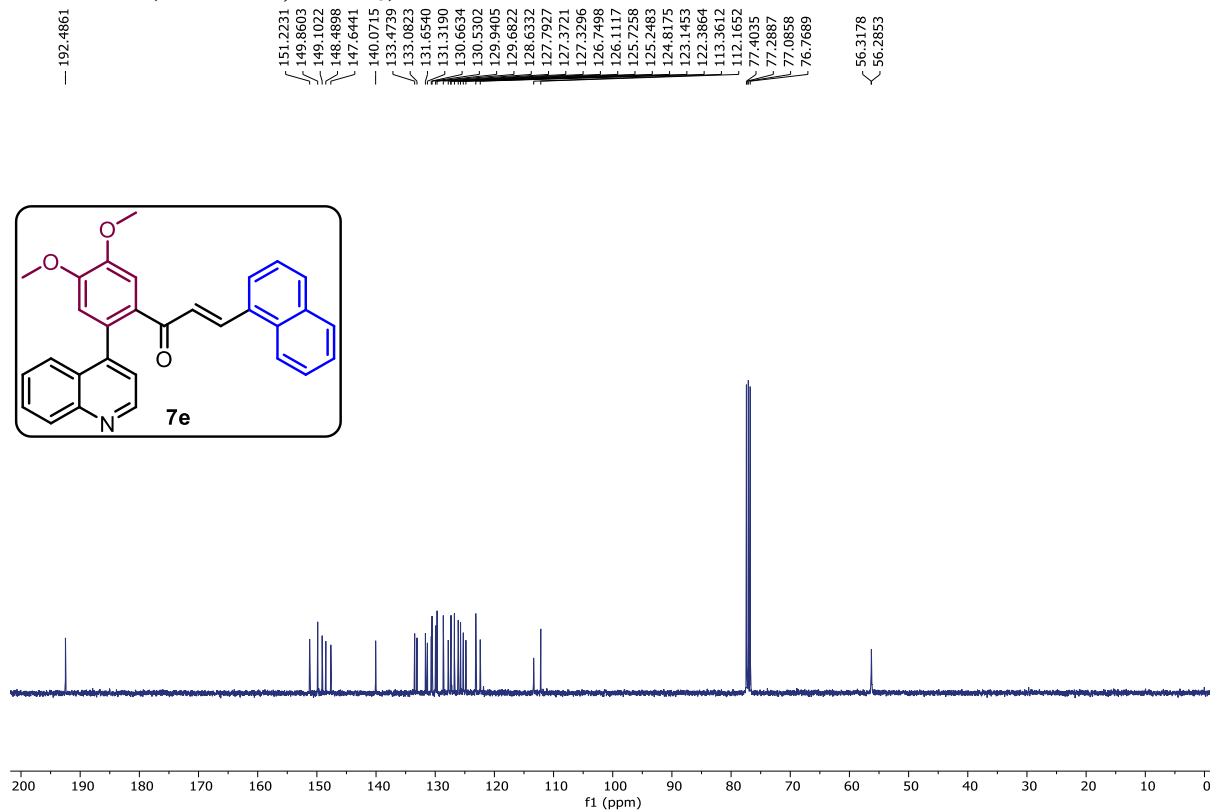

### $^1\text{H}$ NMR (400 MHz, $\text{CDCl}_3$ )

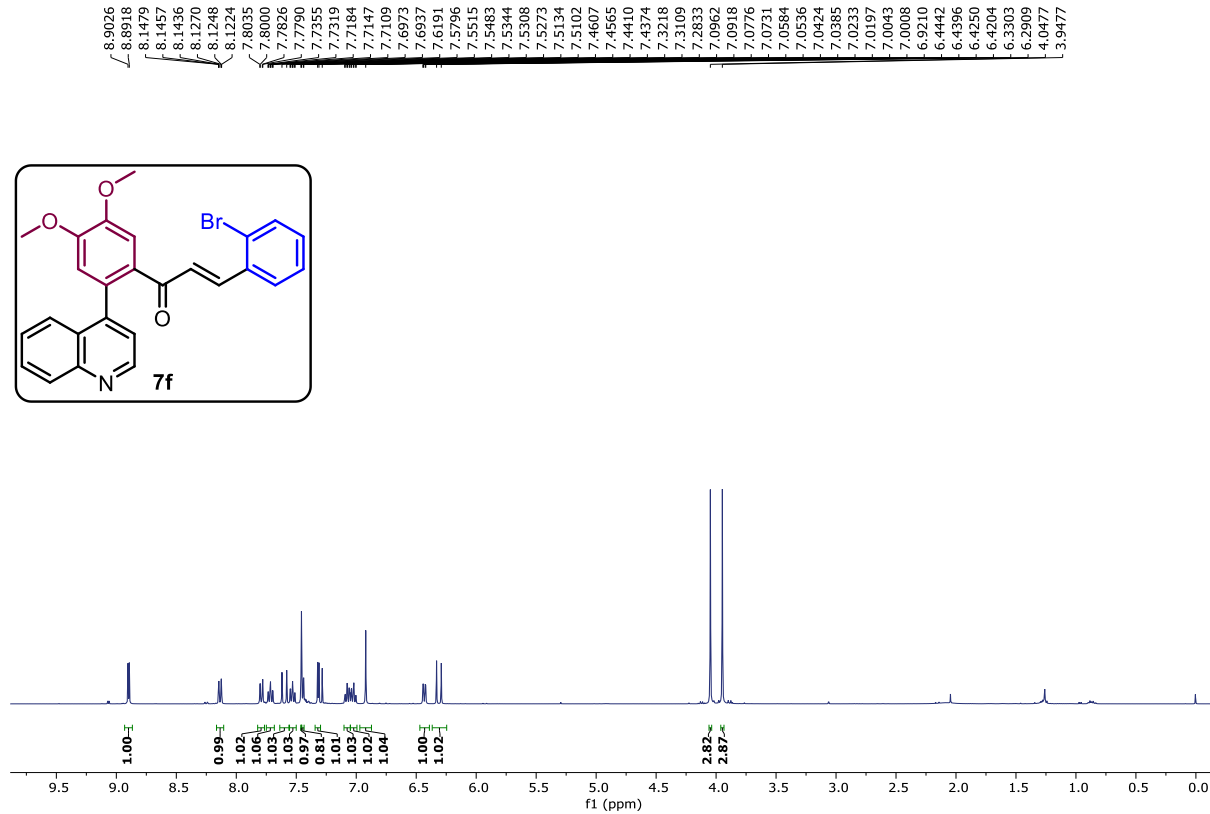

### <sup>13</sup>C NMR (100 MHz, CDCl<sub>3</sub>)

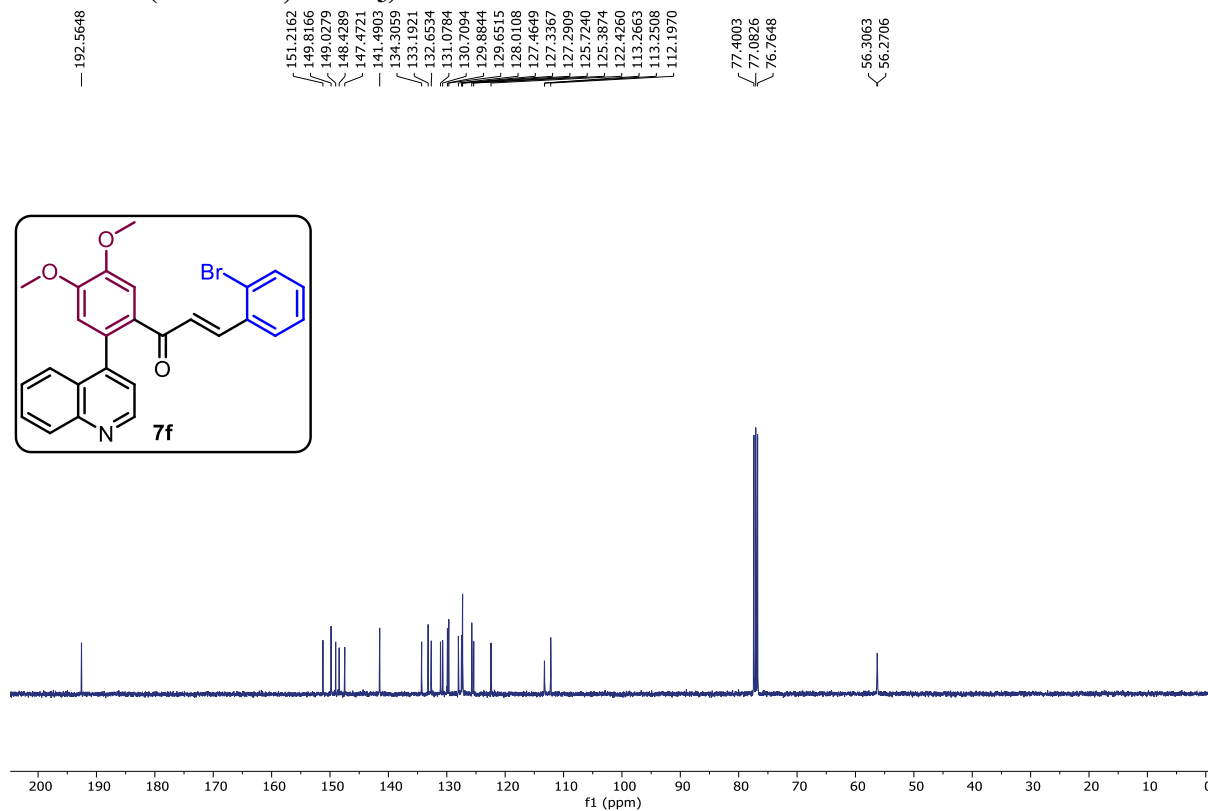

### <sup>1</sup>H NMR (400 MHz, CDCl<sub>3</sub>)

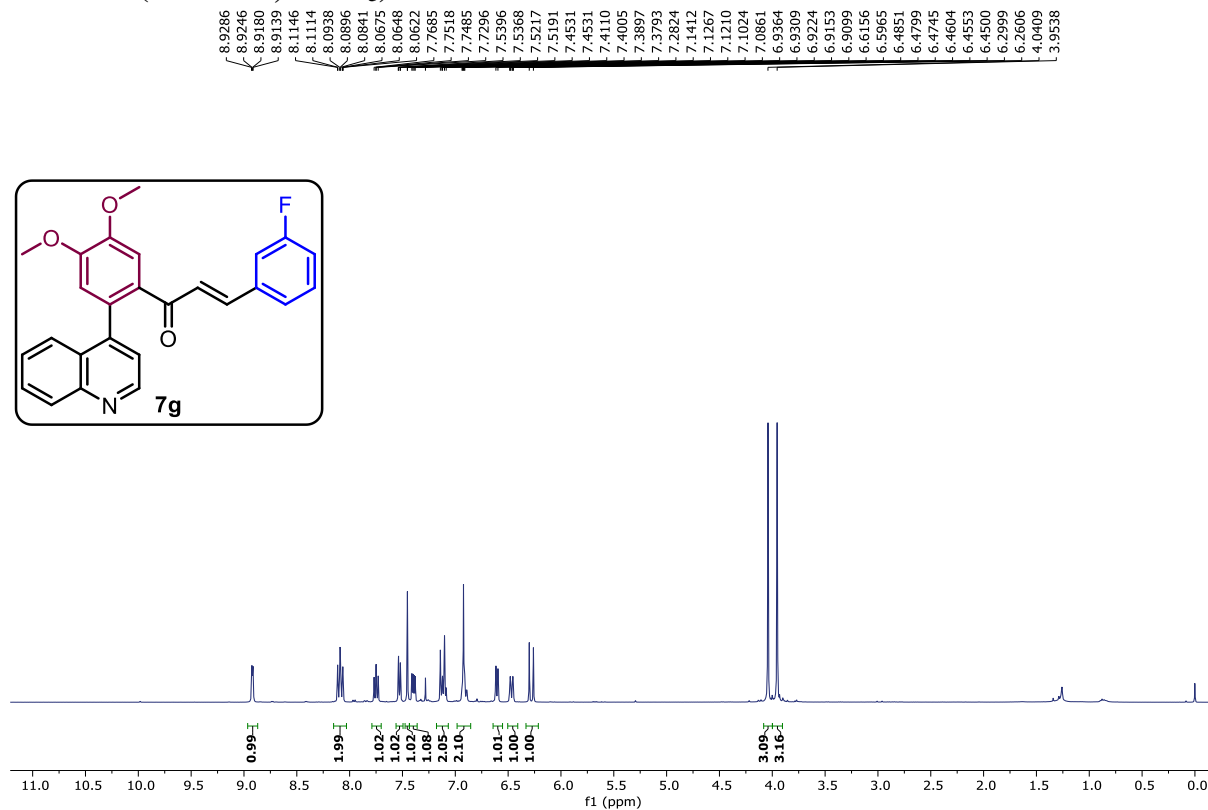

### <sup>13</sup>C NMR (100 MHz, CDCl<sub>3</sub>)

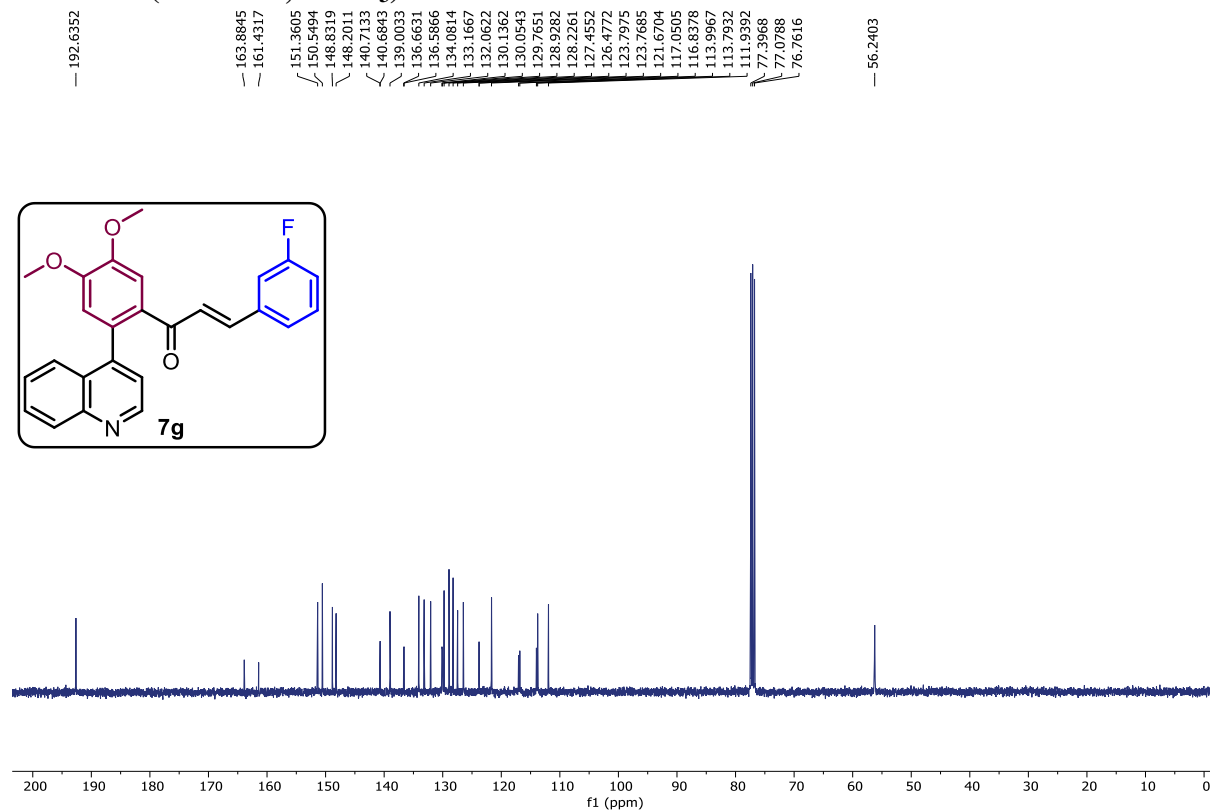

### <sup>19</sup>F NMR (376 MHz, CDCl<sub>3</sub>)

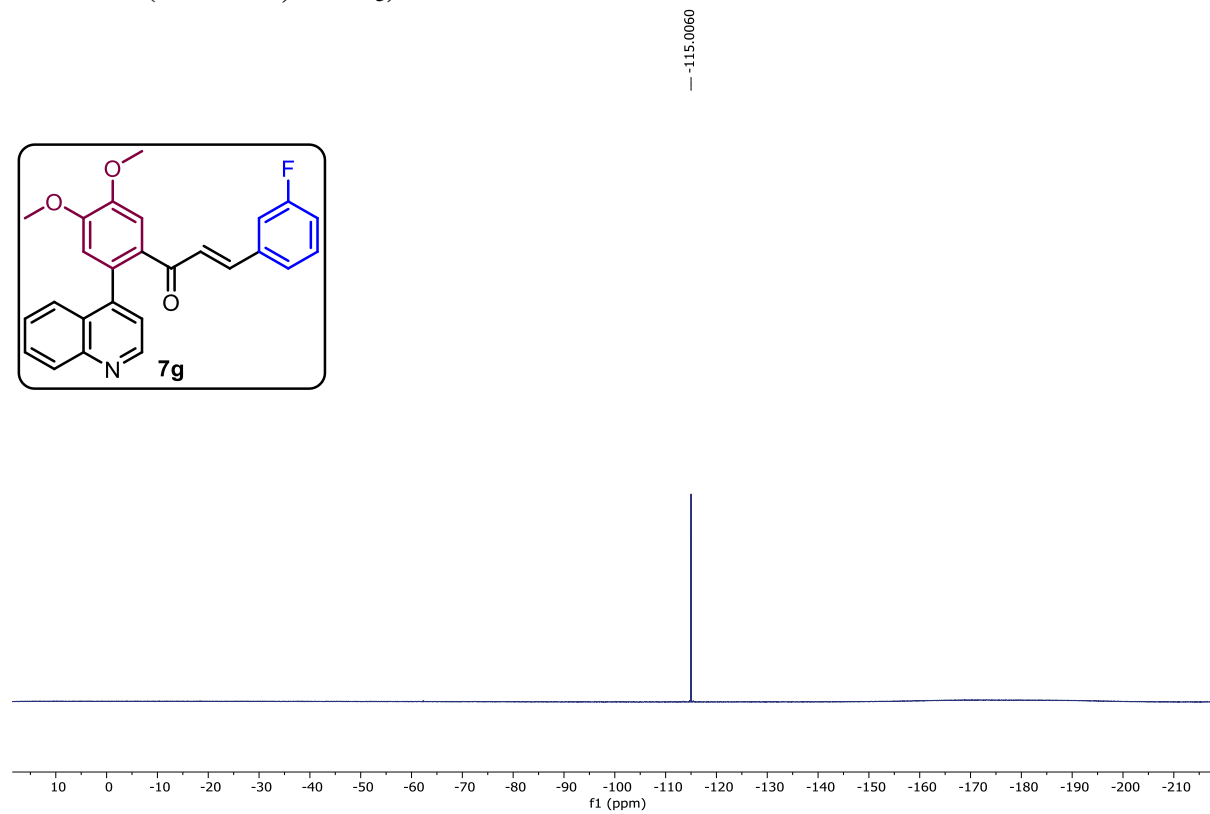



### <sup>1</sup>H NMR (400 MHz, CDCl<sub>3</sub>)

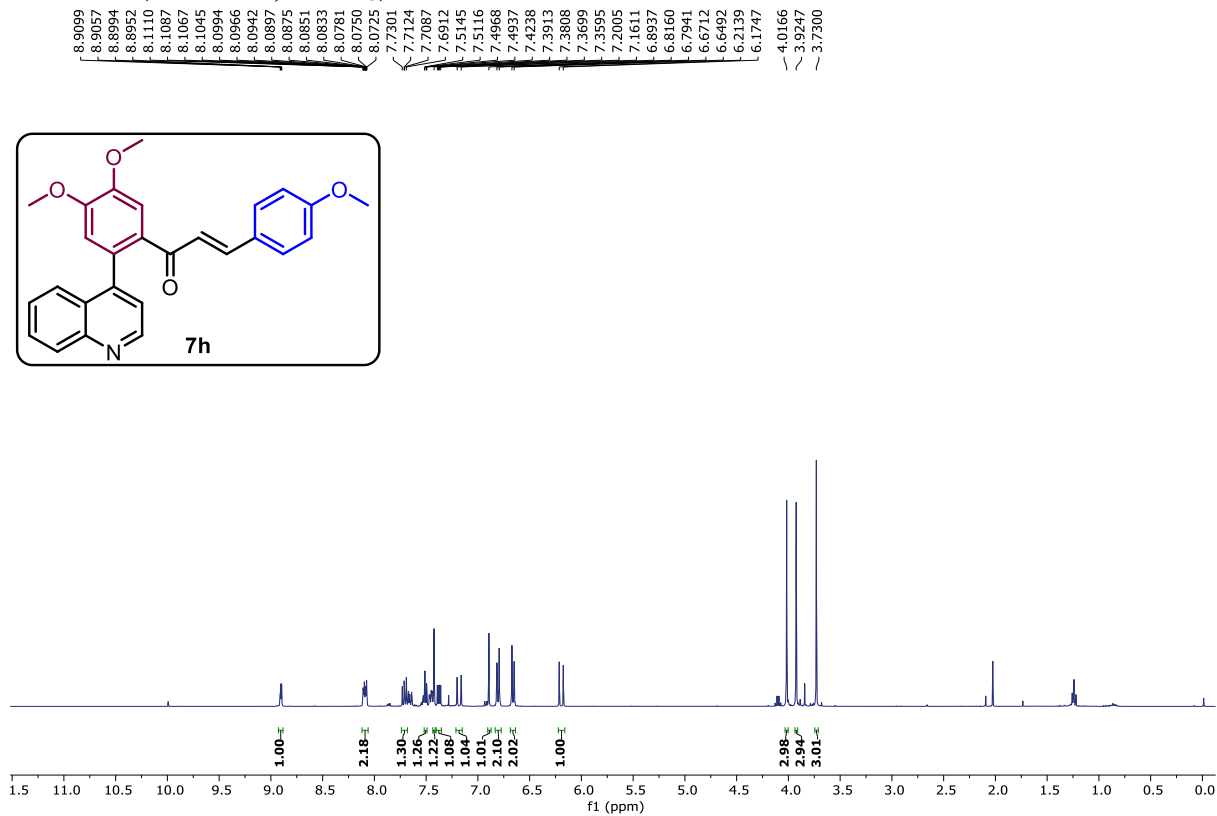

### <sup>13</sup>C NMR (100 MHz, CDCl<sub>3</sub>)

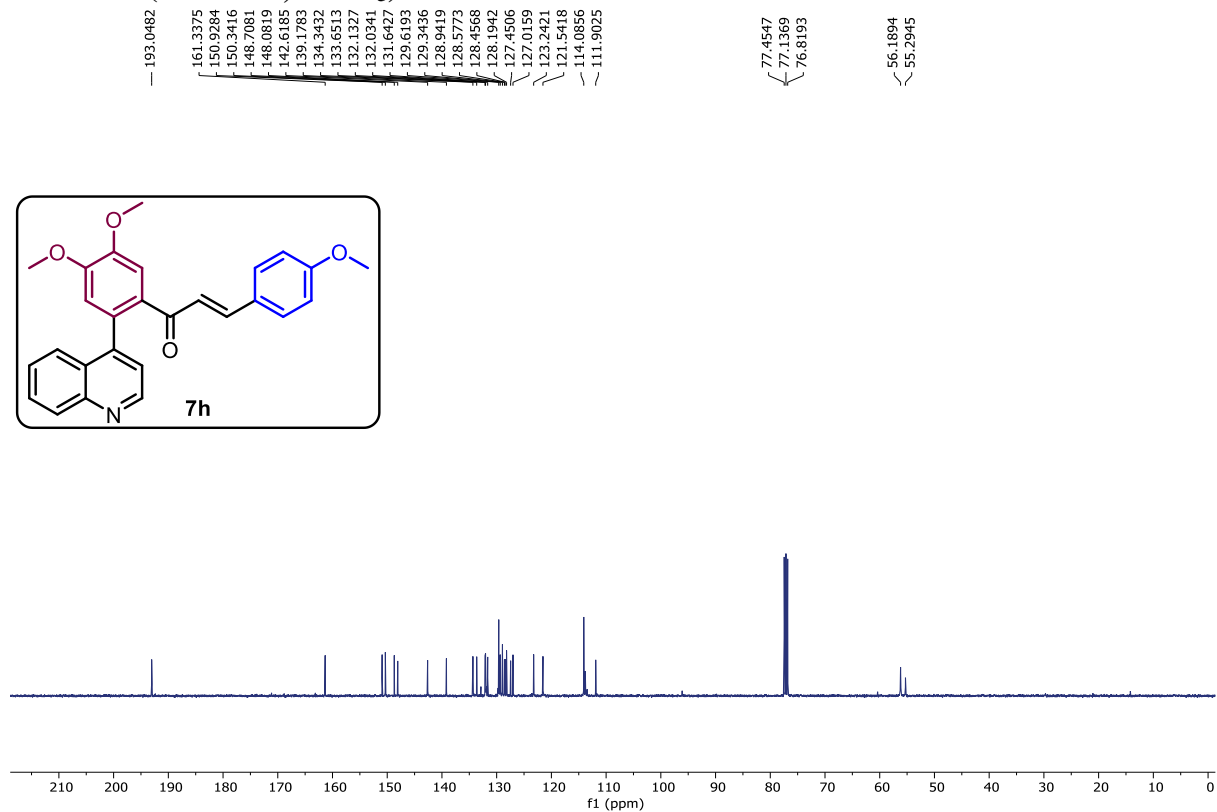

# <sup>1</sup>H NMR (400 MHz, CDCl<sub>3</sub>)

8.8833  
8.8724  
8.1472  
8.1262  
7.7179  
7.7141  
7.7010  
7.6970  
7.6931  
7.6797  
7.6759  
7.6106  
7.5999  
7.5882  
7.5697  
7.5660  
7.5211  
7.5180  
7.5096  
7.5062  
7.5005  
7.4969  
7.4836  
7.4800  
7.2833  
7.2690  
7.2658  
7.2601  
7.2511  
7.2475  
7.2439  
7.2201  
7.2046  
7.1997  
7.1880  
7.1817  
7.0294  
7.0115  
7.0075  
6.5846  
6.5448  
2.0052

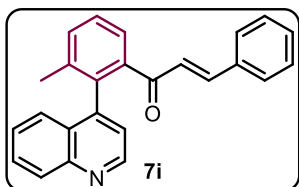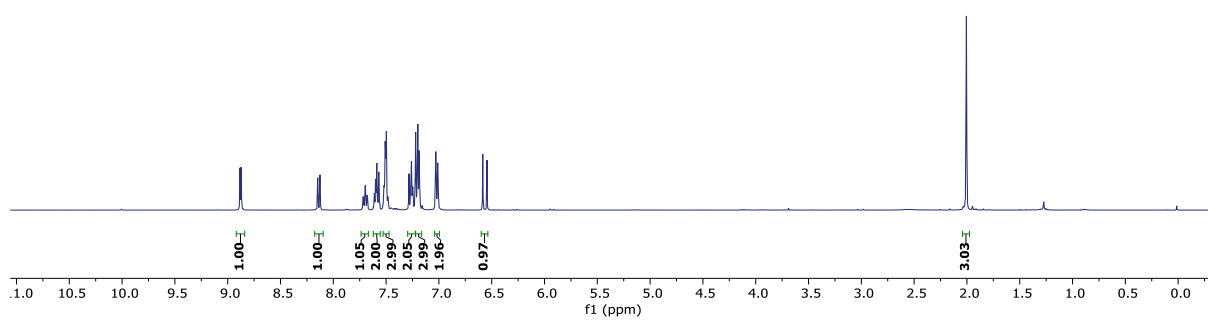

# <sup>13</sup>C NMR (100 MHz, CDCl<sub>3</sub>)

194.9166  
150.0460  
148.2275  
146.3837  
144.6662  
140.8392  
137.3462  
135.5015  
134.1409  
132.5200  
130.4698  
130.1261  
129.4126  
128.7295  
128.4429  
128.1524  
127.3117  
127.1764  
126.0580  
125.8142  
125.6678  
122.2410  
77.5073  
77.1901  
76.8716  
20.2061

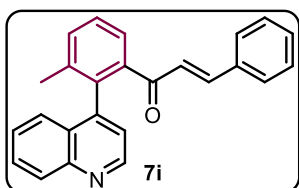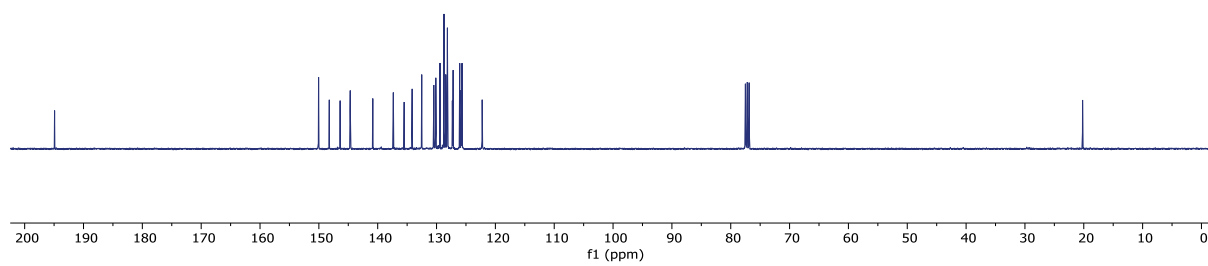

# <sup>1</sup>H NMR (400 MHz, CDCl<sub>3</sub>)

8.9607  
8.9500  
8.2143  
8.2121  
8.2098  
8.1927  
8.1909  
8.1888  
8.1197  
8.1179  
8.0978  
8.0274  
8.0244  
8.0066  
8.0044  
8.0021  
8.0004  
7.8628  
7.8416  
7.7456  
7.7413  
7.7292  
7.7246  
7.7199  
7.7080  
7.6084  
7.6052  
7.5917  
7.5882  
7.5846  
7.5711  
7.5678  
7.4872  
7.4706  
7.4663  
7.4504  
7.4474  
7.4342  
7.4306  
7.3902  
7.3869  
7.3725  
7.3688  
7.3655  
7.3615  
7.3520  
7.3487  
7.3117  
7.3091  
7.2997  
7.2906  
7.2876  
7.2822  
7.2660  
7.2626  
7.2596  
7.2265  
7.2223  
7.2108  
7.2068  
7.1892  
7.1859  
6.9854  
6.9826  
6.9787  
6.9702  
6.9652  
6.9611  
6.6107  
6.5707

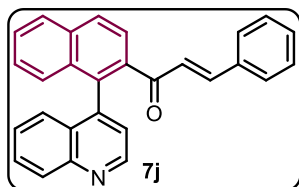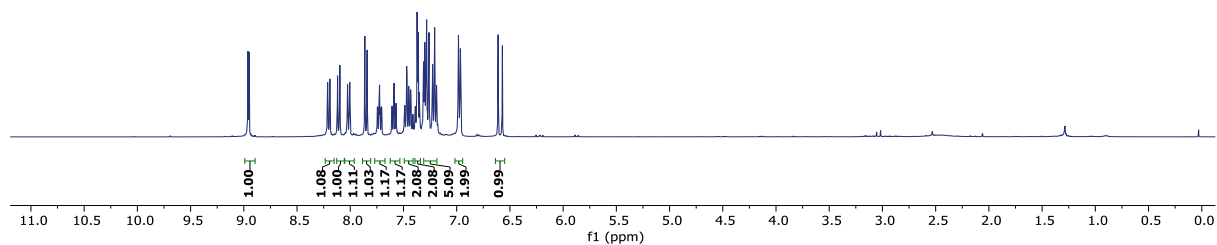

# <sup>13</sup>C NMR (100 MHz, CDCl<sub>3</sub>)

195.2374  
150.0015  
148.1649  
145.2366  
144.7345  
138.0629  
134.1638  
134.0746  
131.8292  
130.5523  
130.0419  
129.5916  
129.1960  
128.7460  
128.3365  
128.1795  
127.6141  
127.3709  
127.2846  
127.0627  
126.3279  
125.8392  
124.9284  
123.5617  
77.4713  
77.1527  
76.8345

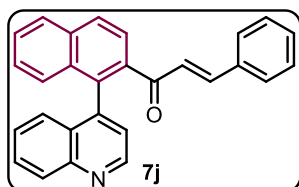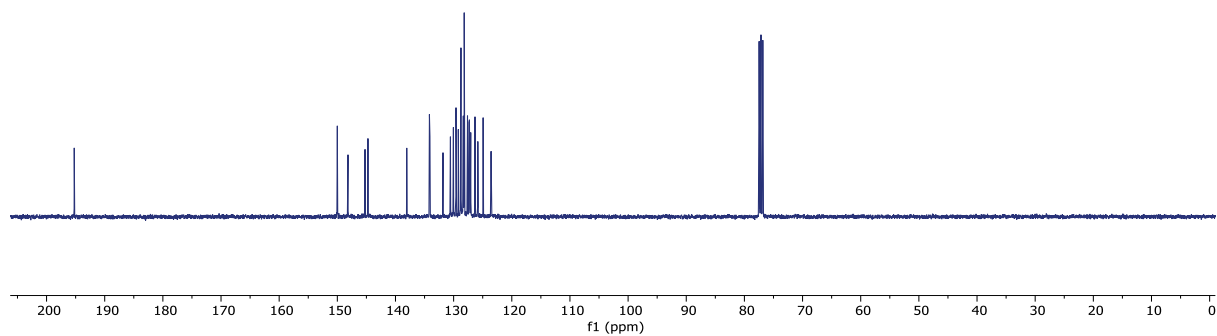

### <sup>1</sup>H NMR (400 MHz, CDCl<sub>3</sub>)

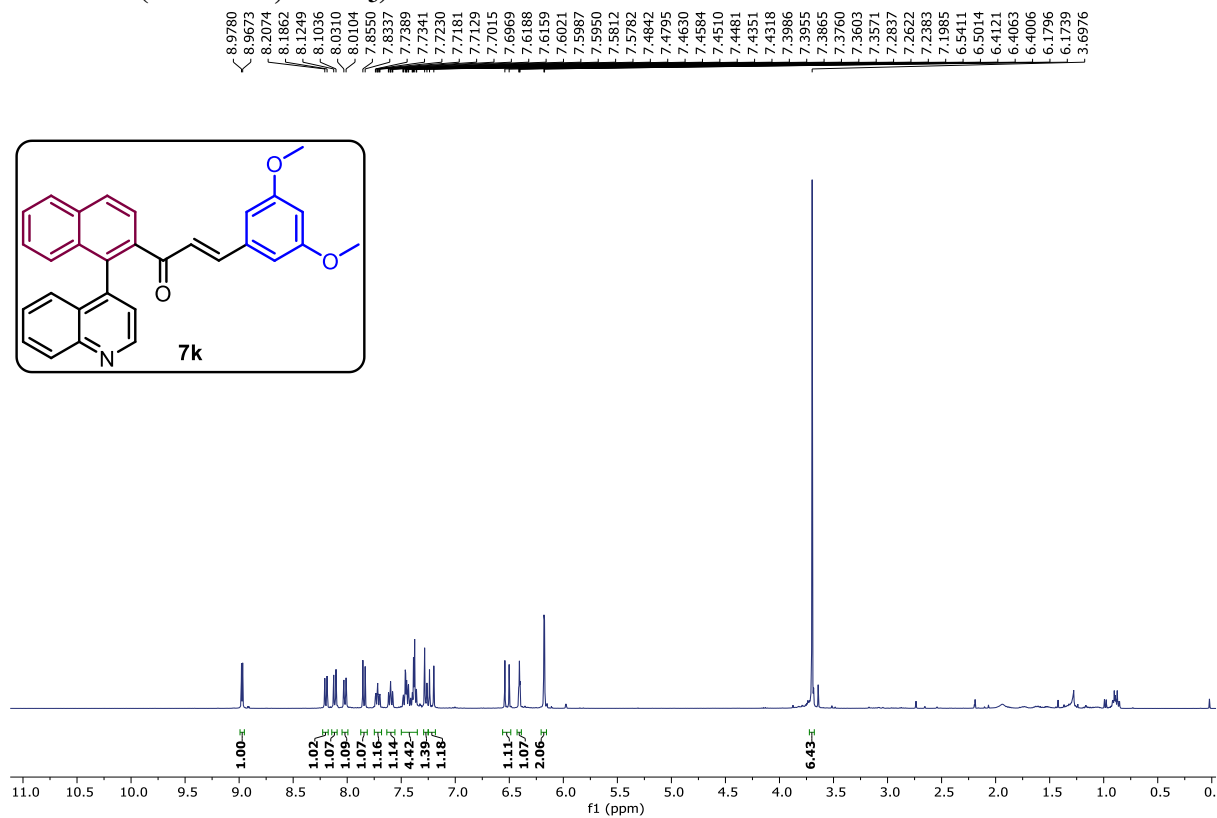

### <sup>13</sup>C NMR (100 MHz, CDCl<sub>3</sub>)

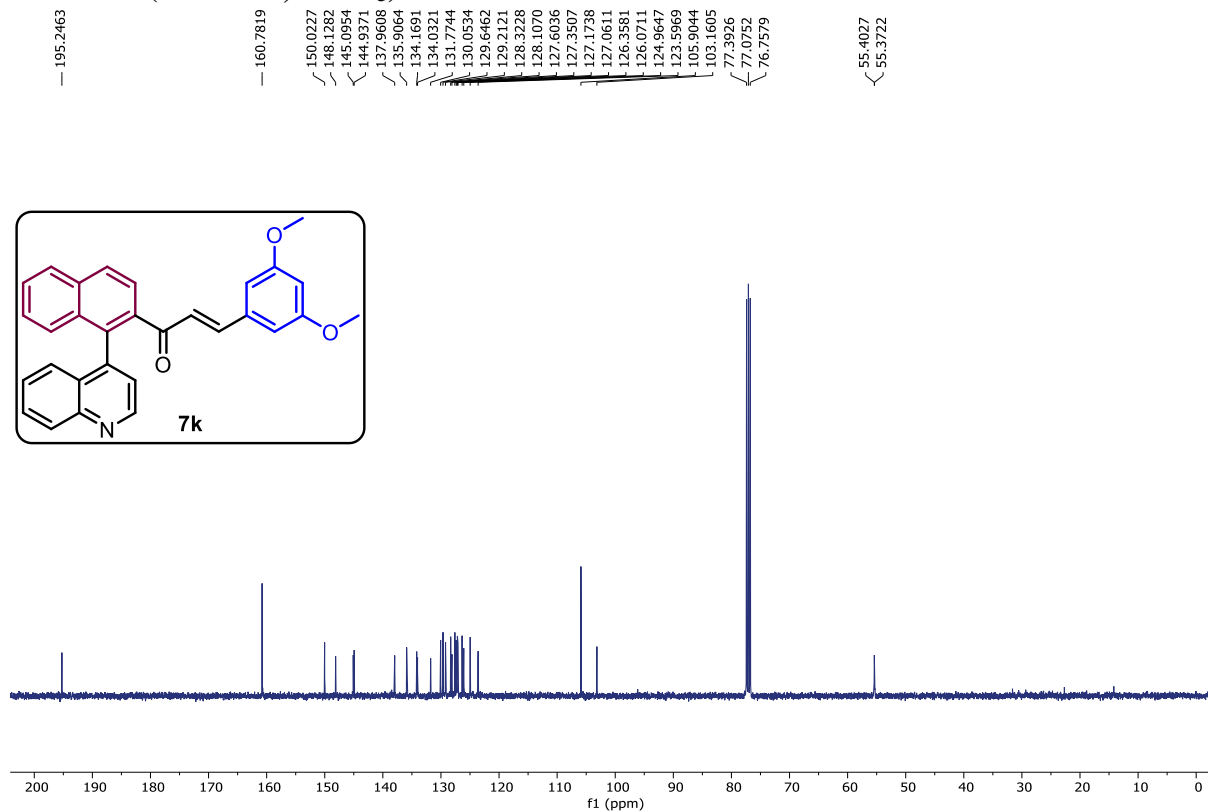

# <sup>1</sup>H NMR (400 MHz, CDCl<sub>3</sub>)

8.8203  
8.8093  
8.1332  
8.1302  
8.1120  
8.1089  
7.7701  
7.7665  
7.7491  
7.7455  
7.7238  
7.7074  
7.7013  
7.6488  
7.6359  
7.6313  
7.6272  
7.6236  
7.6203  
7.6133  
7.6093  
7.6050  
7.4929  
7.4871  
7.4706  
7.4104  
7.4071  
7.3933  
7.3896  
7.3860  
7.3722  
7.3687  
7.1861  
7.1816  
7.1772  
7.1747  
7.1694  
7.1659  
7.1612  
7.1565  
6.8726  
6.8687  
6.7553  
6.7492  
6.7448  
6.7406  
6.7368  
6.7309  
1.6050  
1.6014  
0.8223

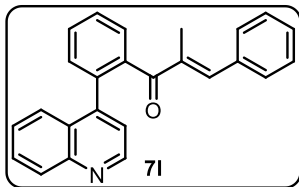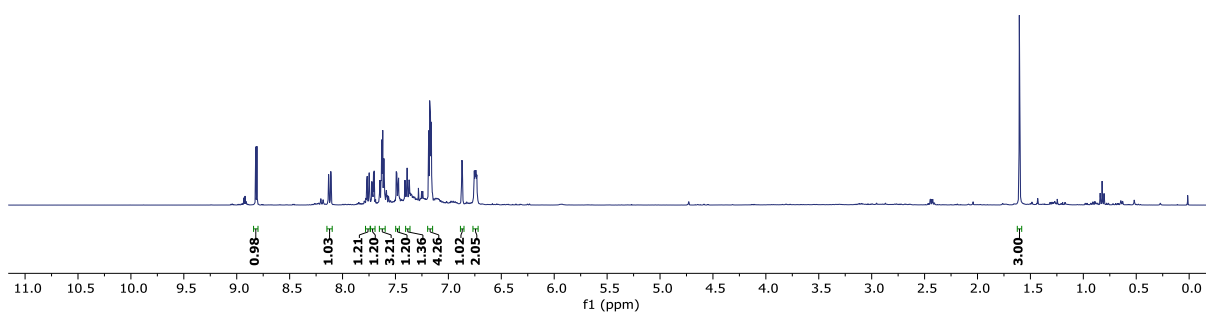

# <sup>13</sup>C NMR (100 MHz, CDCl<sub>3</sub>)

200.5409  
149.5468  
148.3583  
147.2717  
142.9535  
140.7244  
137.9685  
136.3308  
135.0329  
130.4841  
130.4841  
129.9913  
129.7338  
129.5722  
129.1786  
129.0360  
128.7200  
128.6754  
128.4234  
128.3767  
128.1195  
126.9366  
126.7138  
126.0324  
121.9530  
77.4841  
77.1663  
76.8488  
12.9622

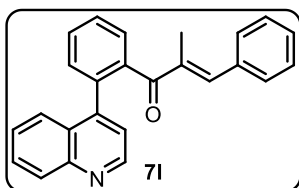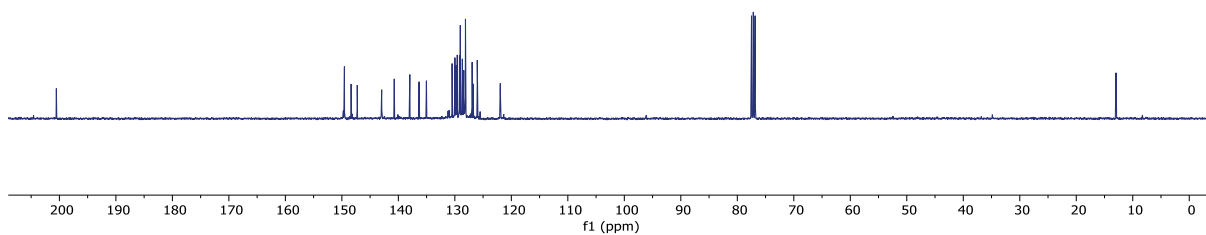

# <sup>1</sup>H NMR (400 MHz, CDCl<sub>3</sub>)

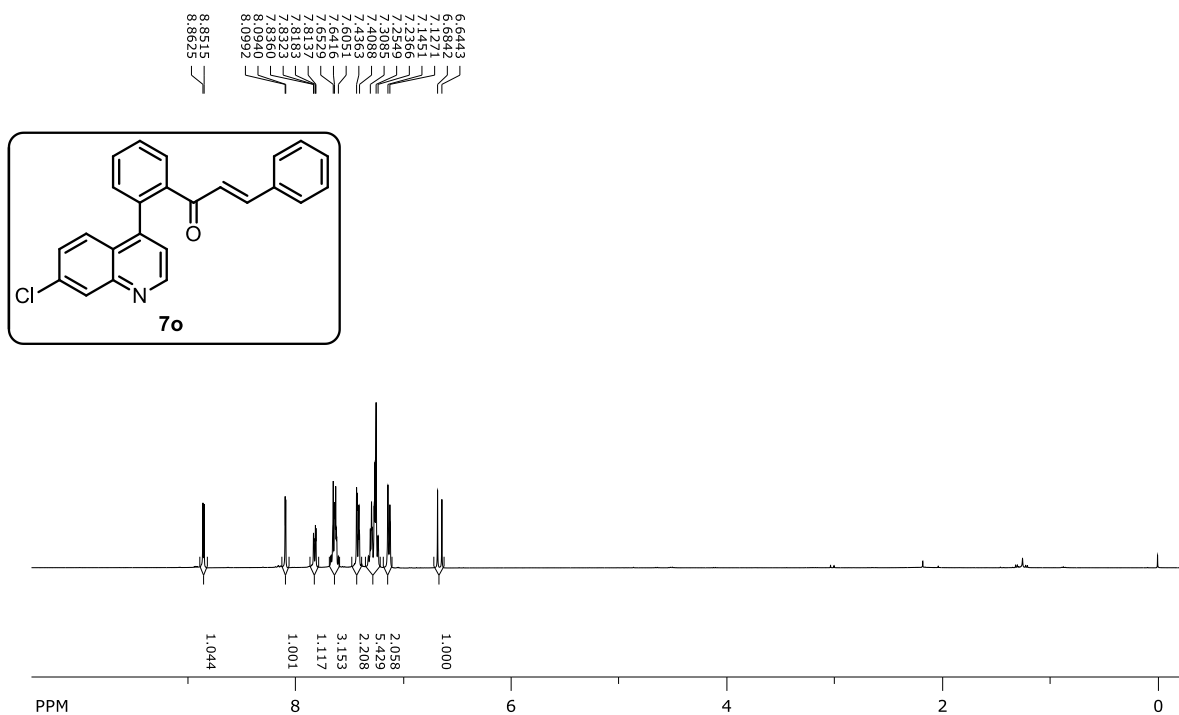

# <sup>13</sup>C NMR (100 MHz, CDCl<sub>3</sub>)

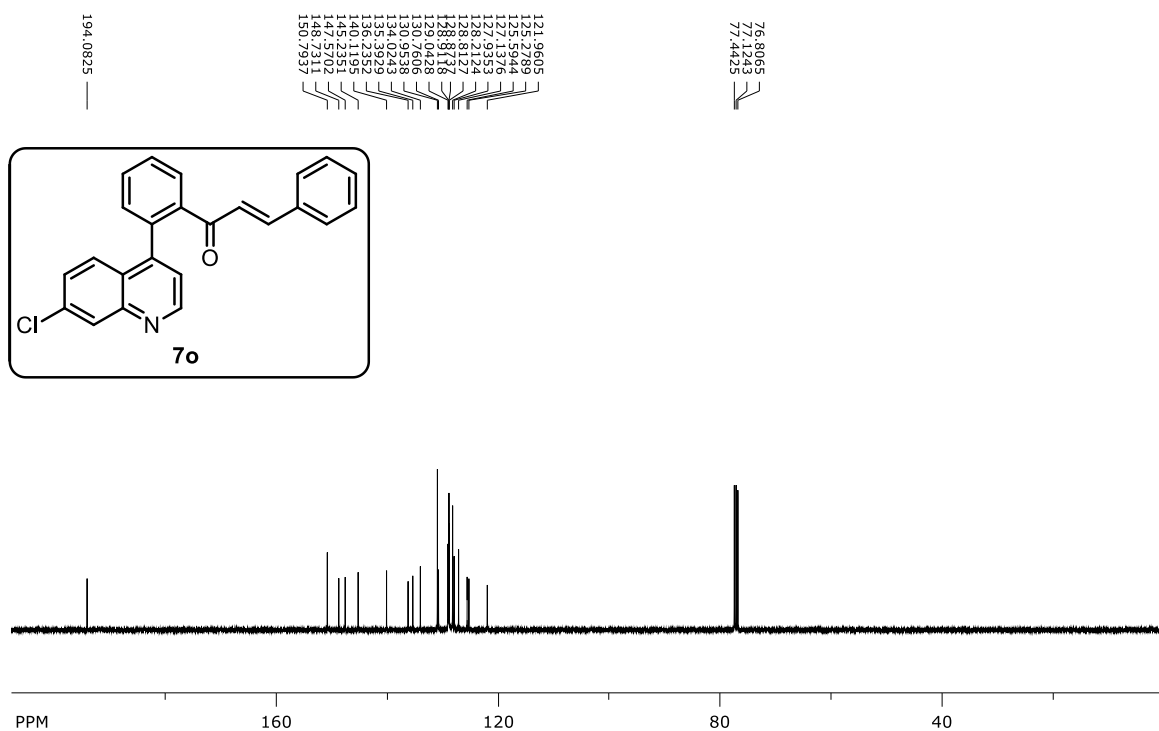

# <sup>1</sup>H NMR (400 MHz, CDCl<sub>3</sub>)

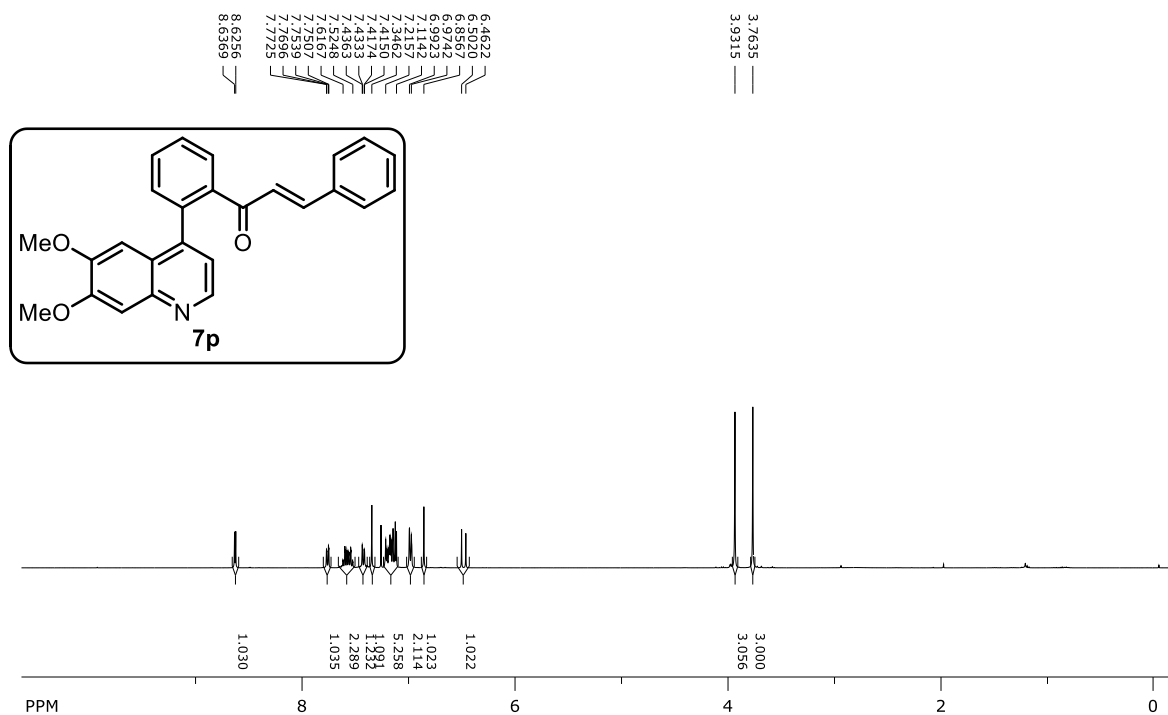

# <sup>13</sup>C NMR (100 MHz, CDCl<sub>3</sub>)

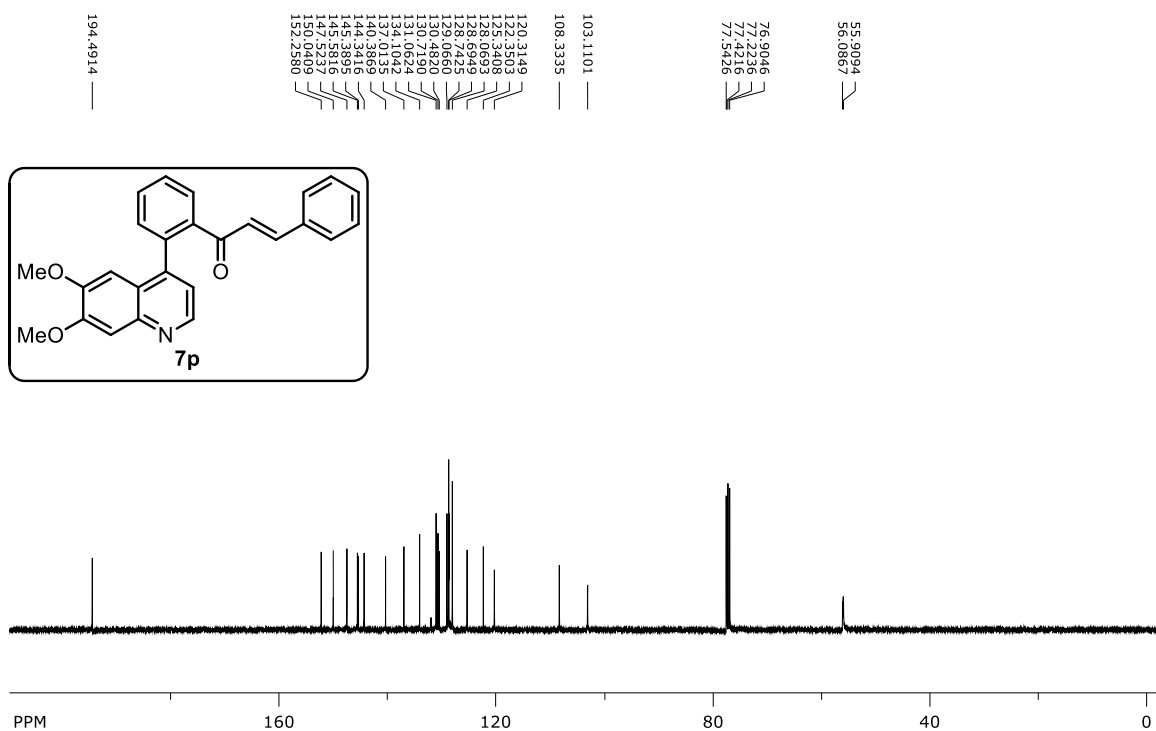

# <sup>1</sup>H NMR (400 MHz, CDCl<sub>3</sub>)

9.2662  
9.2509  
7.8852  
7.8700  
7.8179  
7.8132  
7.8002  
7.7957  
7.6796  
7.6754  
7.6623  
7.6572  
7.6438  
7.6399  
7.5747  
7.5700  
7.5568  
7.5505  
7.5407  
7.5354  
7.5155  
7.5109  
7.5005  
7.4939  
7.4112  
7.4028  
7.3987  
7.3842  
7.2853  
7.1935  
7.1535  
4.5957

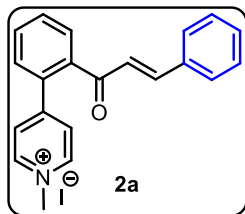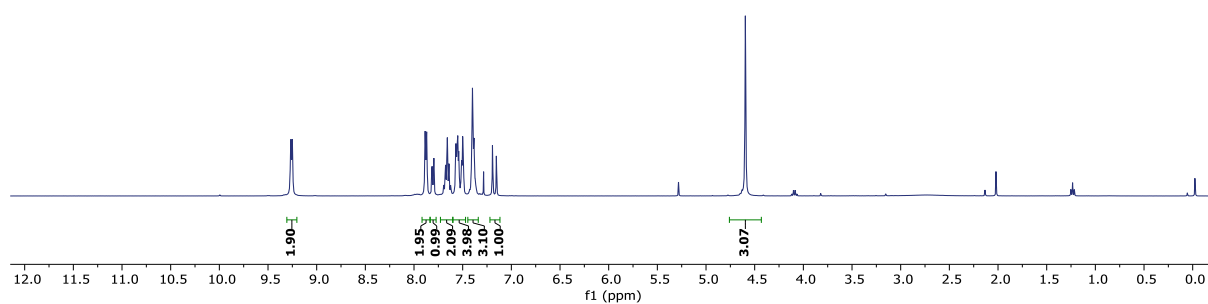

# <sup>13</sup>C NMR (100 MHz, CDCl<sub>3</sub>)

193.08  
158.58  
147.83  
144.93  
138.51  
135.54  
133.83  
132.16  
131.48  
131.01  
130.74  
129.67  
129.16  
128.89  
127.80  
124.62  
77.51  
77.19  
76.88  
48.73

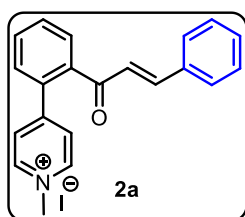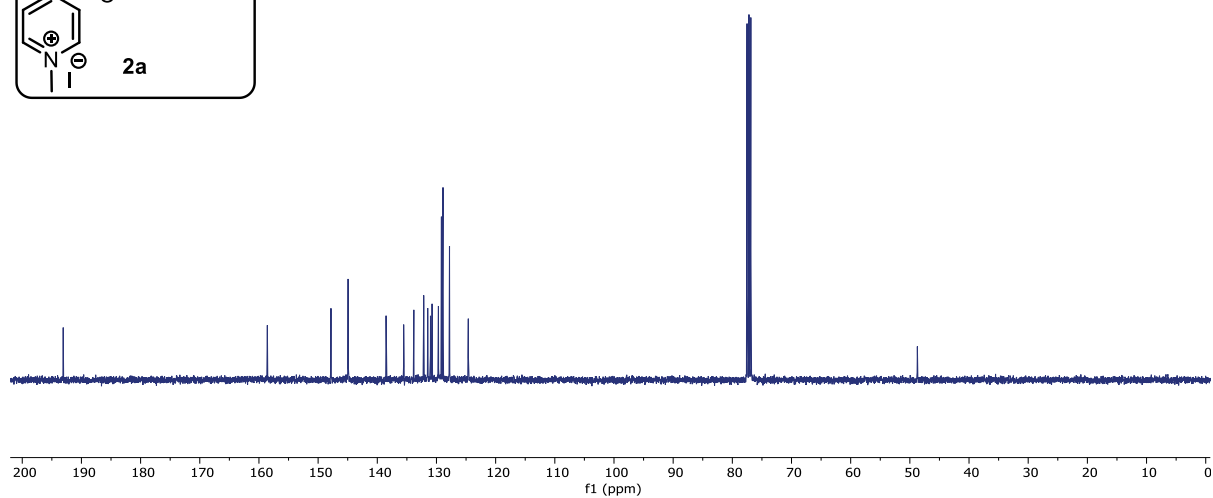



# <sup>1</sup>H NMR (500 MHz, CDCl<sub>3</sub>)

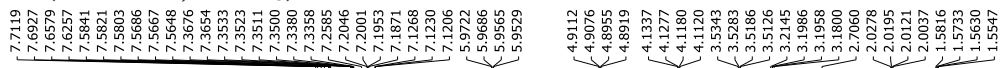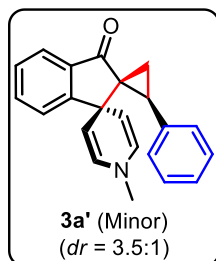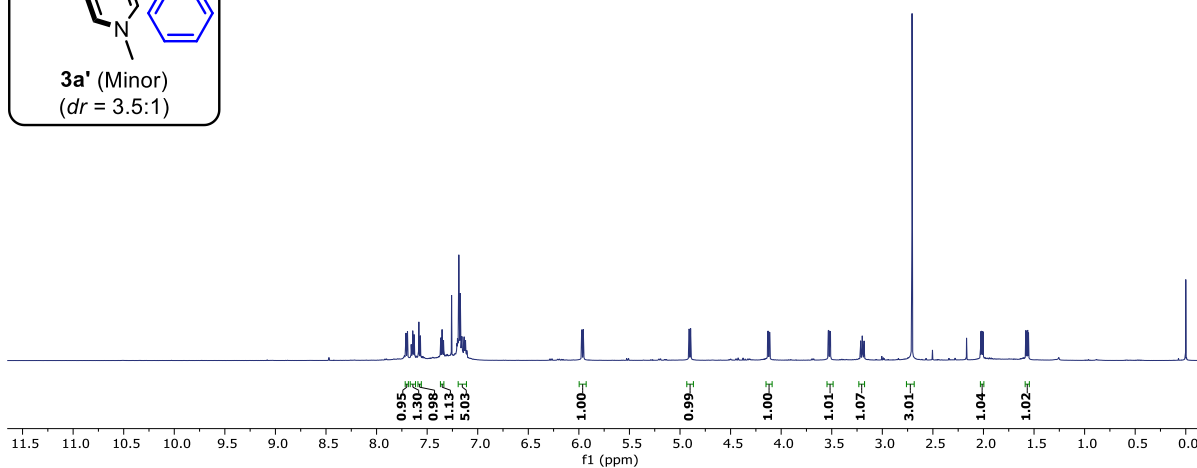

# <sup>13</sup>C NMR (125 MHz, CDCl<sub>3</sub>)

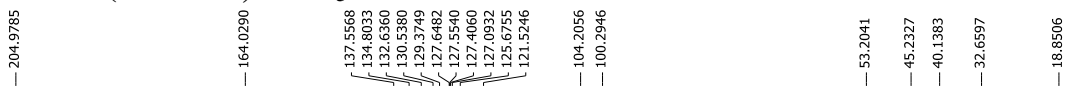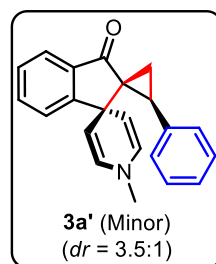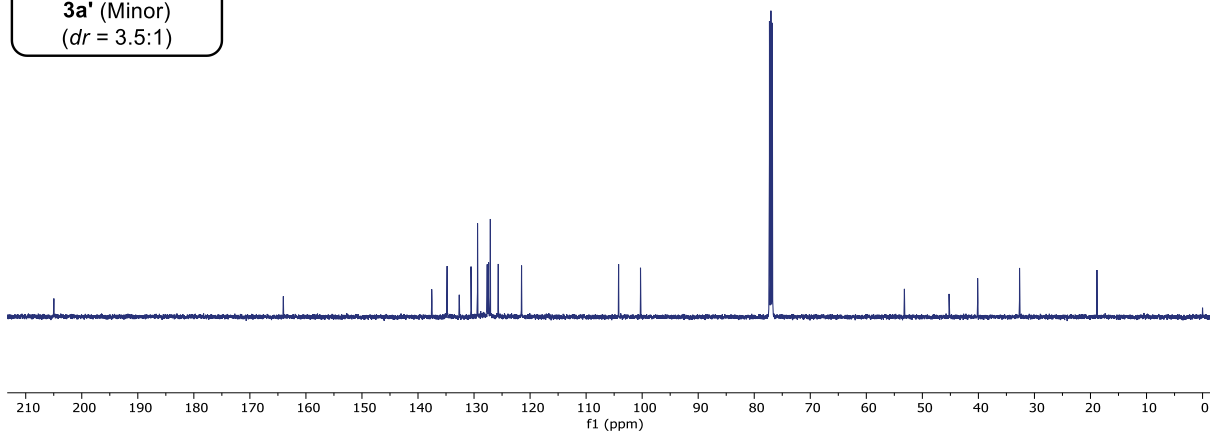

# <sup>1</sup>H NMR (400 MHz, CDCl<sub>3</sub>)

7.6818, 7.6741, 7.6716, 7.6653, 7.6628, 7.6595, 7.5751, 7.5723, 7.5696, 7.5557, 7.5532, 7.5506, 7.3584, 7.3494, 7.3468, 7.3385, 7.3307, 7.3273, 7.3186, 7.2921, 7.2815, 7.2706, 7.2625, 7.2592, 7.2387, 7.2286, 7.2181, 7.2072, 7.1981, 7.1880, 6.2037, 6.1884, 6.1840, 6.0992, 6.0946, 6.0797, 6.0752, 4.3291, 4.3217, 4.3095, 4.3022, 4.1039, 4.0965, 4.0843, 4.0770, 3.0166, 2.9919, 2.9703, 2.1138, 2.1031, 2.0933, 2.0826, 1.7220, 1.7113, 1.6894, 1.6867

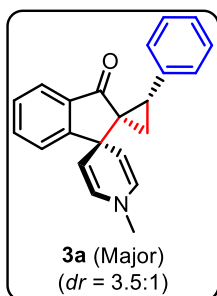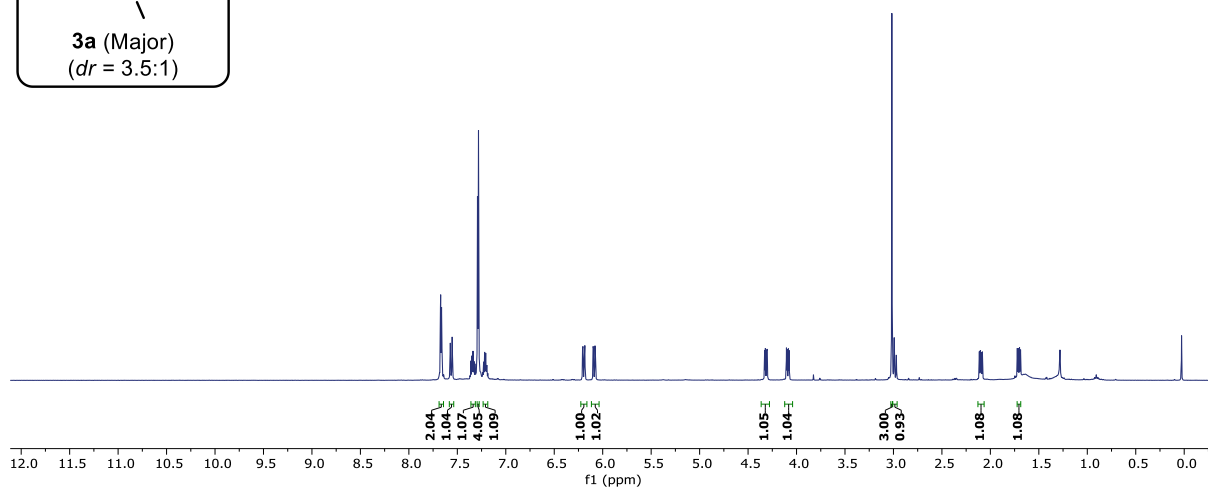

# <sup>13</sup>C NMR (100 MHz, CDCl<sub>3</sub>)

202.9499, 162.6521, 136.4329, 134.6460, 134.4622, 130.4886, 129.9097, 129.2790, 127.7421, 127.7105, 127.4760, 126.5183, 121.5628, 101.9438, 101.8790, 52.9273, 46.1357, 40.5078, 33.6704, 18.7015

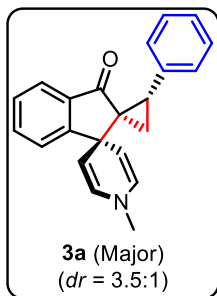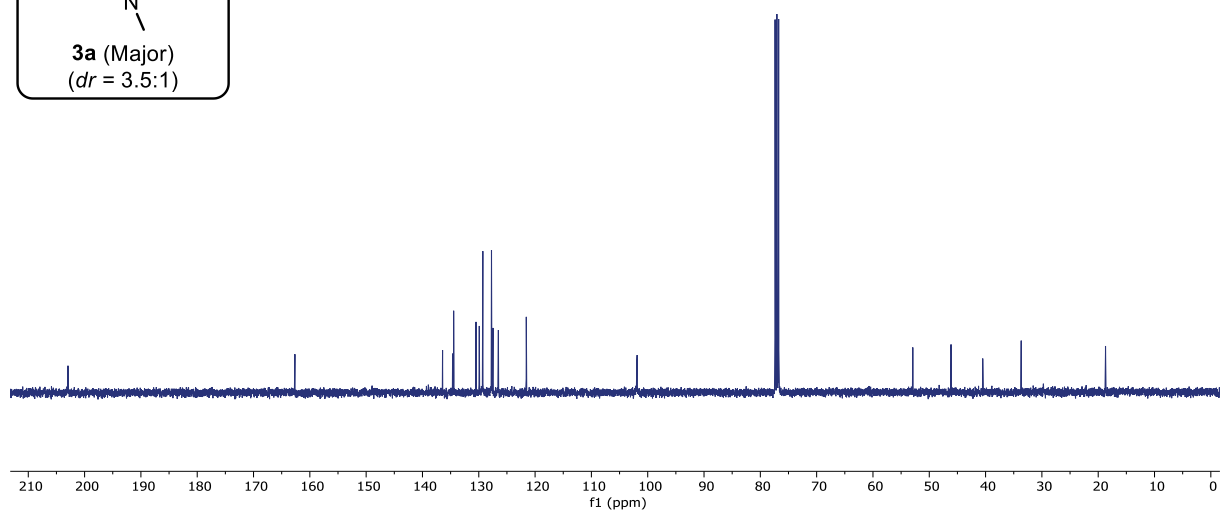

# <sup>1</sup>H NMR (400 MHz, CDCl<sub>3</sub>)

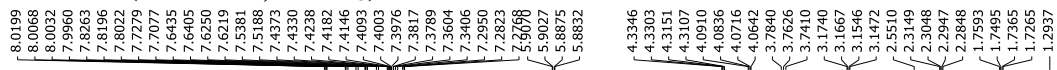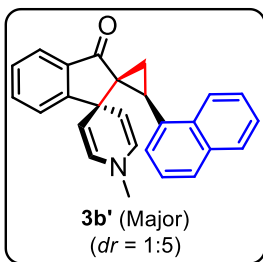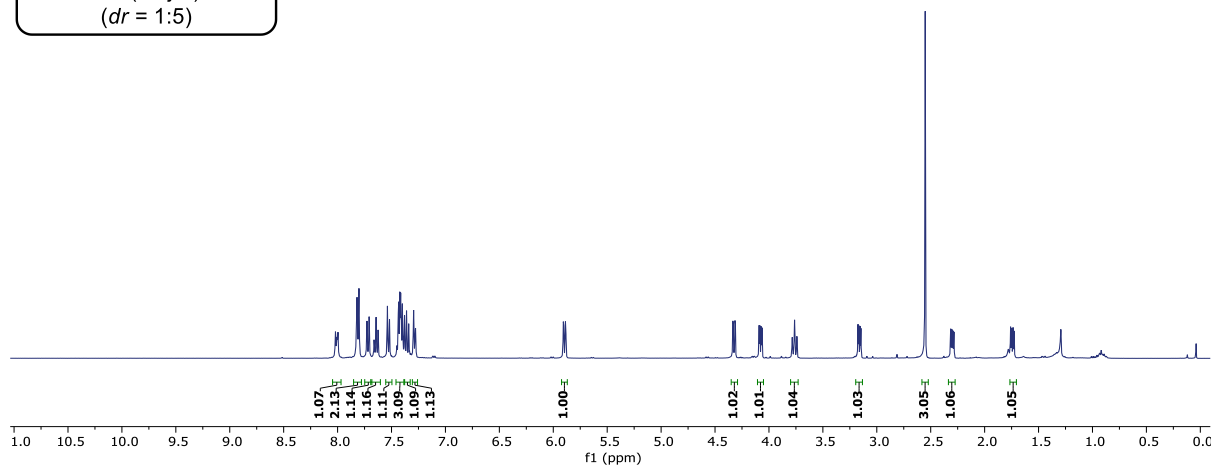

# <sup>13</sup>C NMR (100 MHz, CDCl<sub>3</sub>)

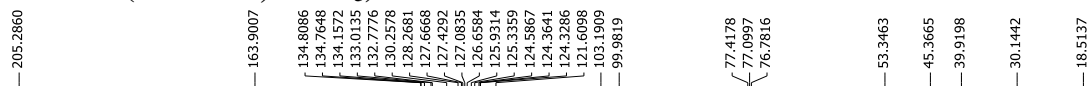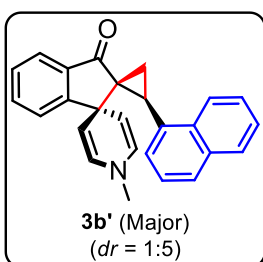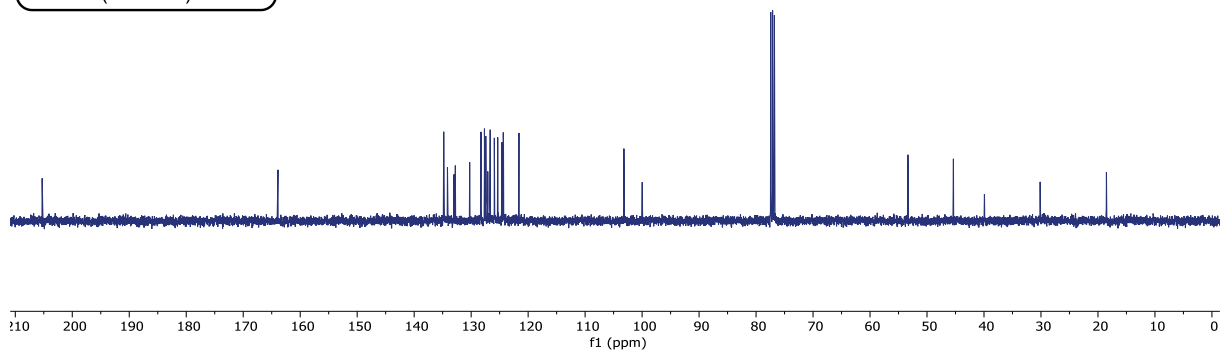

# <sup>1</sup>H NMR (500 MHz, CDCl<sub>3</sub>)

8.2307  
8.2122  
8.1297  
8.1274  
8.1147  
8.1124  
8.0984  
8.0148  
7.9990  
7.9919  
7.9856  
7.9734  
7.9649  
7.9398  
7.9245  
7.8200  
7.8180  
7.8160  
7.8046  
7.8027  
7.8008  
7.7788  
7.7768  
7.5969  
7.5844  
7.5819  
7.5696  
7.5671  
7.4582  
7.4562  
7.4544  
7.4427  
7.4409  
7.4390  
7.3819  
7.3798  
7.3667  
7.3646  
7.3520  
7.3500  
7.2320  
5.8383  
5.8349  
5.8228  
5.8193  
4.0785  
4.0725  
4.0629  
4.0570  
4.0405  
4.0233  
4.0060  
3.8596  
3.8561  
3.8439  
3.8404  
3.1556  
3.1497  
3.1401  
3.1341  
2.4478  
2.4396  
2.4317  
2.4236  
2.3051  
1.8435  
1.8354  
1.8252  
1.8170

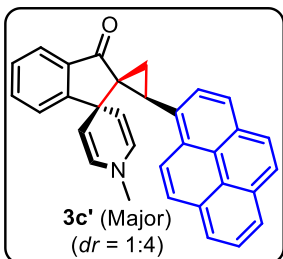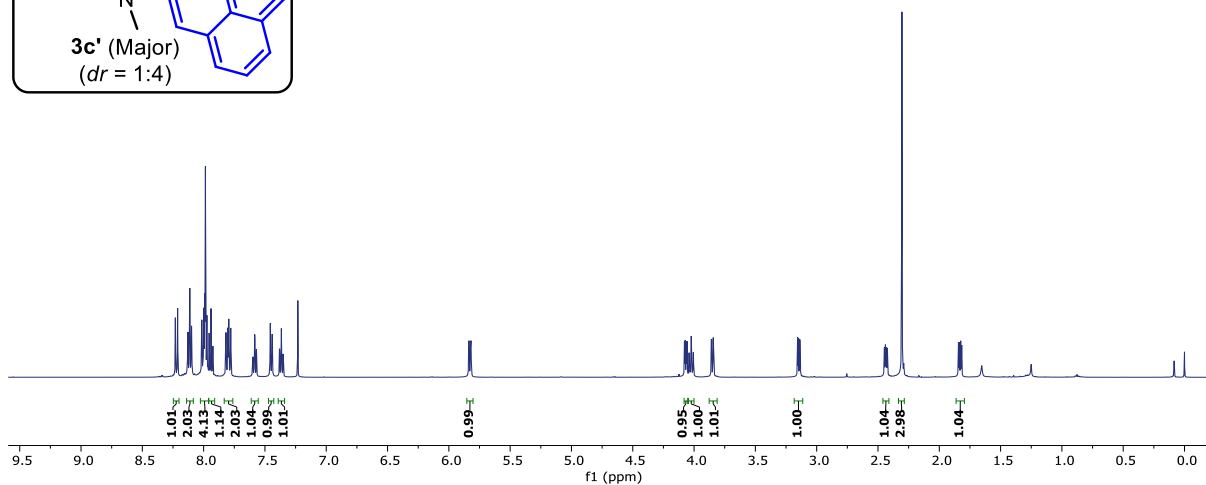

# <sup>13</sup>C NMR (125 MHz, CDCl<sub>3</sub>)

205.0324  
163.9154  
134.8203  
133.0006  
131.8501  
131.7915  
131.3698  
130.9239  
130.4312  
129.9759  
127.6347  
127.4589  
127.3653  
127.1760  
126.7861  
125.7970  
125.1913  
125.0615  
124.8626  
124.7051  
124.1211  
124.1013  
123.5730  
121.6770  
102.8940  
99.8064  
53.4788  
45.4217  
39.6562  
30.6356  
18.8850

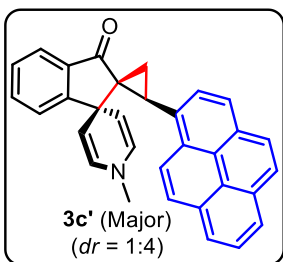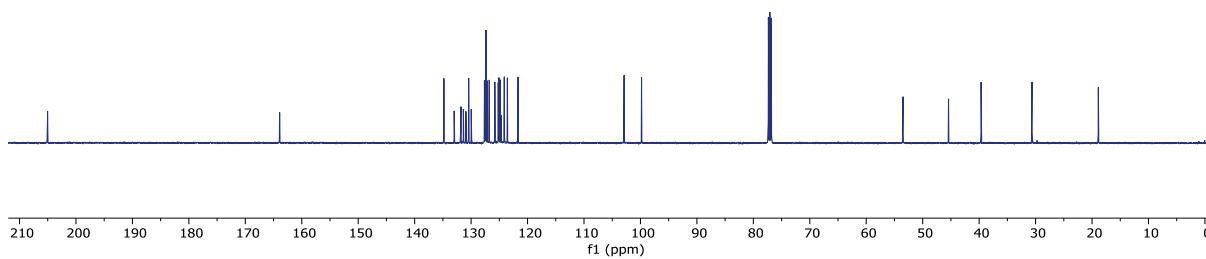

# <sup>1</sup>H NMR (500 MHz, CDCl<sub>3</sub>)

8.1626, 8.1419, 8.1249, 8.1226, 8.1098, 8.1075, 8.0540, 8.0334, 8.0188, 7.9954, 7.9776, 7.9341, 7.9189, 7.9038, 7.8510, 7.8326, 7.7682, 7.7488, 7.6991, 7.6991, 7.3934, 7.3915, 7.3894, 7.3783, 7.3763, 7.3741, 7.2956, 7.2524, 6.3478, 6.3442, 6.3320, 6.3285, 6.1296, 6.1262, 6.1141, 6.1105, 4.7438, 4.7379, 4.7281, 4.7222, 4.1782, 4.1724, 4.1625, 4.1567, 3.5571, 3.5404, 3.5236, 3.0454, 2.3665, 2.3579, 2.3508, 2.3422, 1.9783, 1.9698, 1.9604, 1.9519

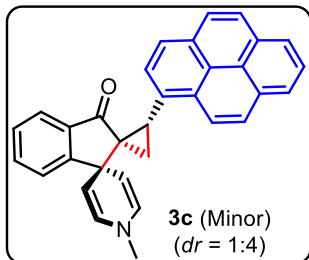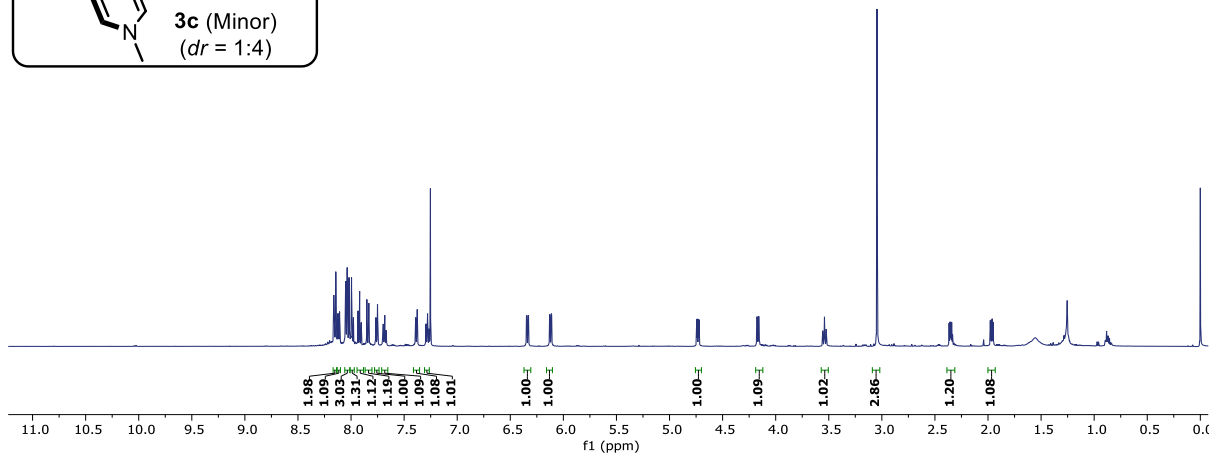

# <sup>13</sup>C NMR (125 MHz, CDCl<sub>3</sub>)

202.5600, 162.4461, 134.6804, 134.5057, 131.6703, 131.3924, 131.1535, 130.7533, 130.3592, 129.6258, 128.1742, 127.6806, 127.6045, 127.5582, 126.9557, 126.7455, 125.5863, 124.9032, 124.8758, 124.7742, 124.7008, 124.3773, 123.5580, 121.6850, 103.2395, 100.2060, 52.9304, 46.6294, 40.5529, 31.5019, 19.4395

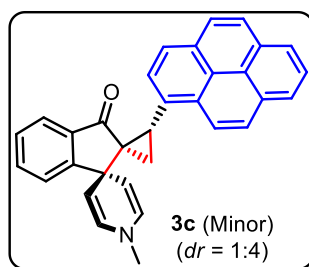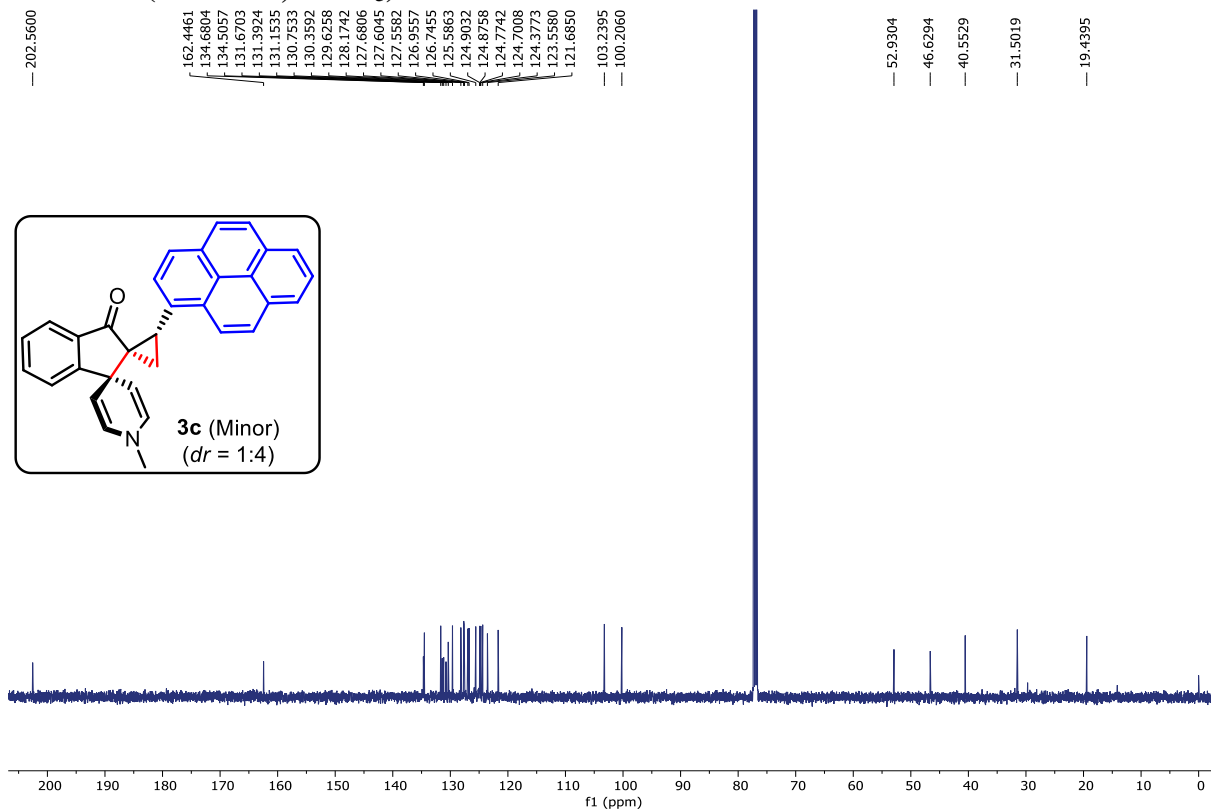

# <sup>1</sup>H NMR (500 MHz, CDCl<sub>3</sub>)

7.6360  
7.6340  
7.6297  
7.6280  
7.6258  
7.6235  
7.5449  
7.5429  
7.5409  
7.5296  
7.5276  
7.5256  
7.3197  
7.3134  
7.3094  
7.3044  
7.3032  
7.2984  
7.2939  
7.2879  
7.2849  
7.1505  
7.1466  
7.1387  
7.1345  
7.0668  
7.0514  
7.0487  
6.1646  
6.1524  
6.1489  
6.0590  
6.0554  
6.0433  
6.0397  
6.0375  
4.2909  
4.2851  
4.2753  
4.2694  
4.0703  
4.0669  
4.0609  
4.0511  
4.0452  
2.9821  
2.9462  
2.9291  
2.9119  
2.2905  
2.0574  
2.0489  
2.0411  
2.0326  
1.6682  
1.6597  
1.6501  
1.6415

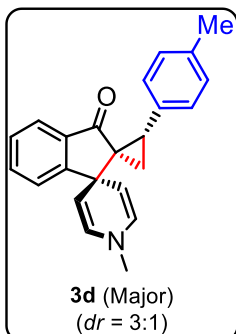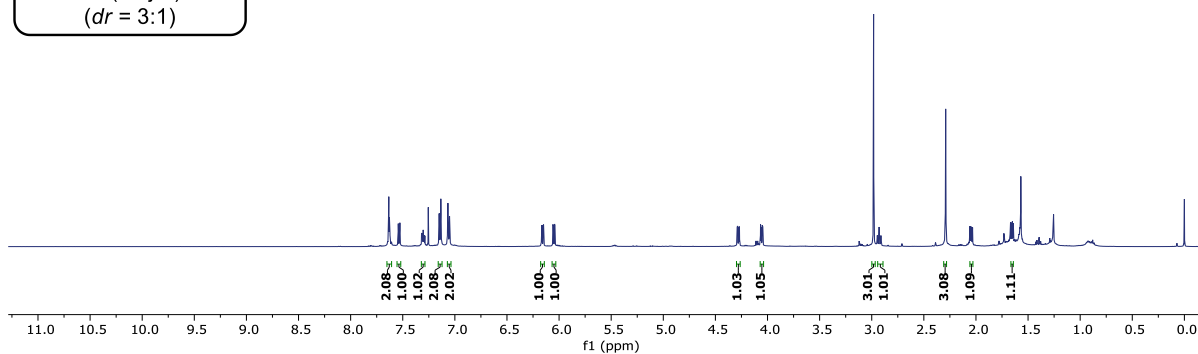

# <sup>13</sup>C NMR (125 MHz, CDCl<sub>3</sub>)

202.9738  
162.6578  
135.9163  
134.7171  
134.3617  
133.2839  
130.4435  
129.8591  
129.1007  
128.5019  
127.6616  
127.4153  
121.5411  
102.0490  
101.9548  
77.2811  
77.0280  
76.7730  
52.8942  
46.1267  
40.4782  
33.4560  
21.1783  
18.7271

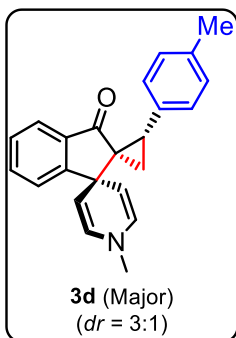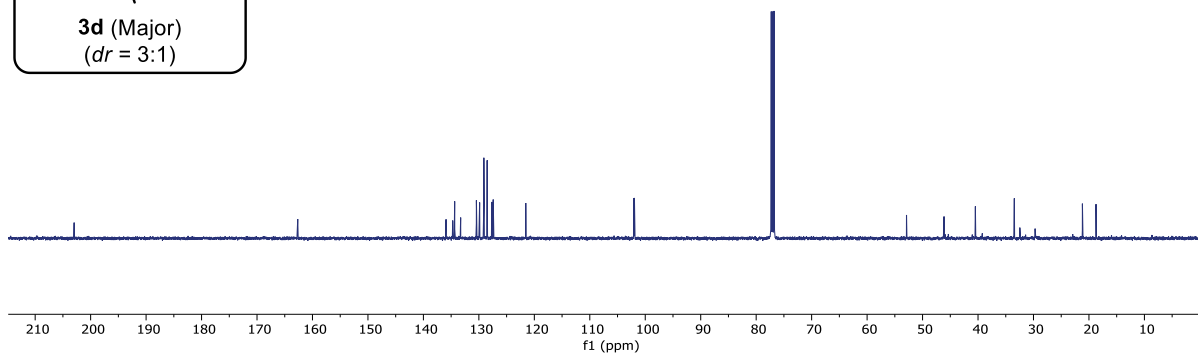

# <sup>1</sup>H NMR (400 MHz, CDCl<sub>3</sub>)

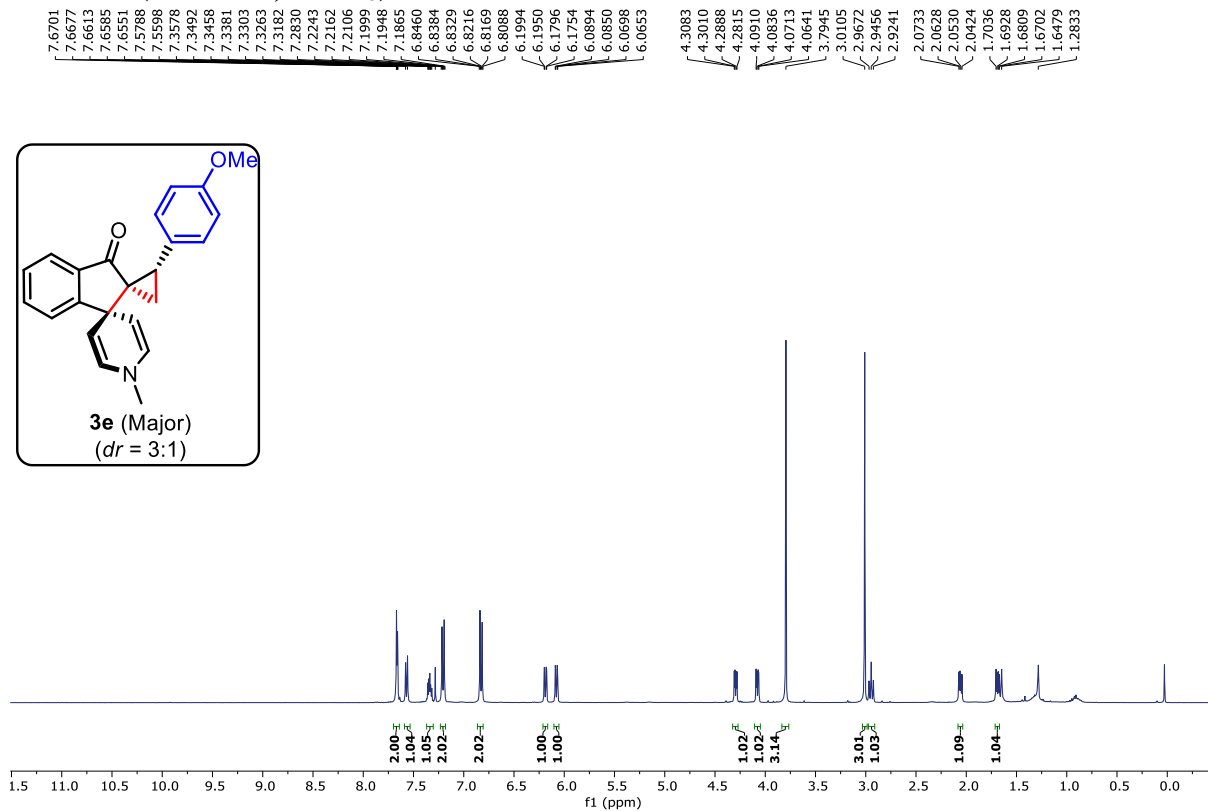

# <sup>13</sup>C NMR (100 MHz, CDCl<sub>3</sub>)

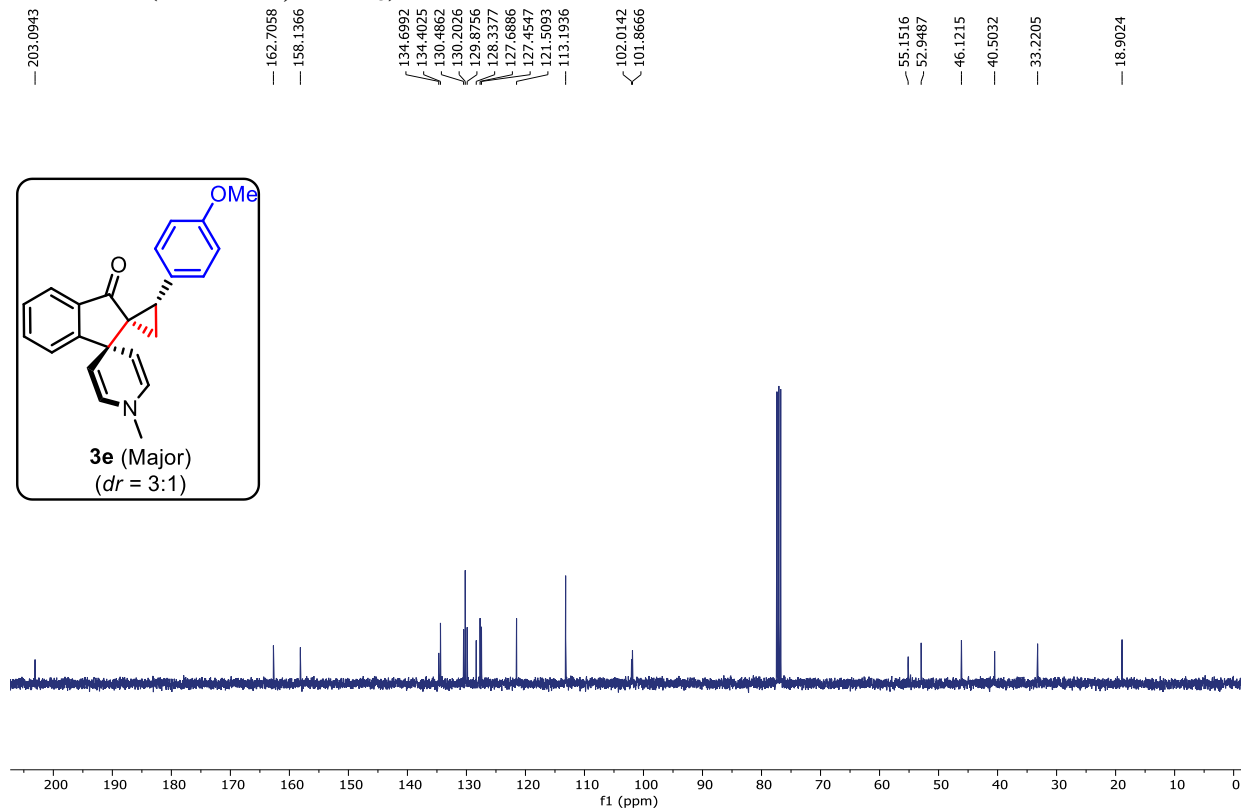

# <sup>1</sup>H NMR (400 MHz, CDCl<sub>3</sub>)

7.6693  
7.6602  
7.6580  
7.5924  
7.5734  
7.3643  
7.3552  
7.3530  
7.3444  
7.3347  
7.3245  
7.2830  
6.4472  
6.4414  
6.3339  
6.3282  
6.3225  
6.1942  
6.1898  
6.1747  
6.1702  
6.0875  
6.0830  
6.0678  
6.0634  
4.3015  
4.2941  
4.2819  
4.2745  
4.0865  
4.0791  
4.0668  
4.0594  
3.8129  
3.8097  
3.7973  
3.7788  
3.7629  
3.0054  
2.9389  
2.9174  
2.8959  
2.0667  
2.0560  
2.0462  
2.0355  
1.6795  
1.6689  
1.6569  
1.6463  
1.2829

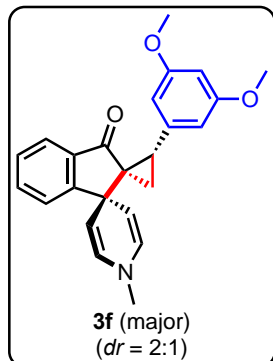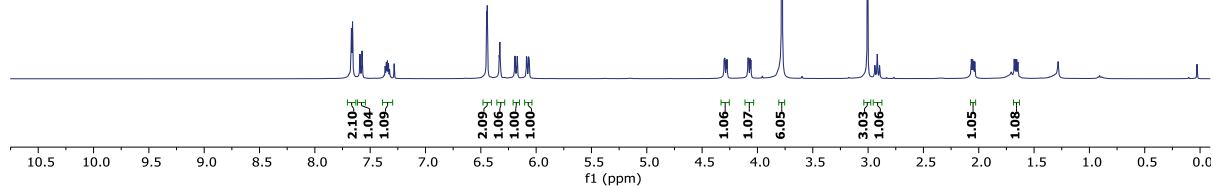

# <sup>13</sup>C NMR (100 MHz, CDCl<sub>3</sub>)

202.8616  
162.5666  
160.1276  
139.0083  
134.6296  
134.4871  
130.4985  
129.9081  
127.7097  
127.5056  
121.5712  
107.5897  
101.8570  
101.7727  
98.4547  
77.3910  
77.0733  
76.7554  
55.2352  
55.2133  
52.9259  
46.1145  
40.4954  
33.8138  
18.8007

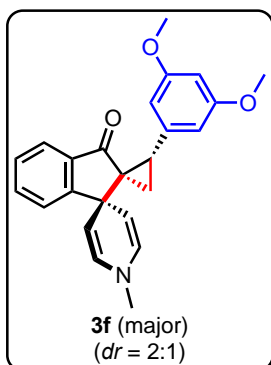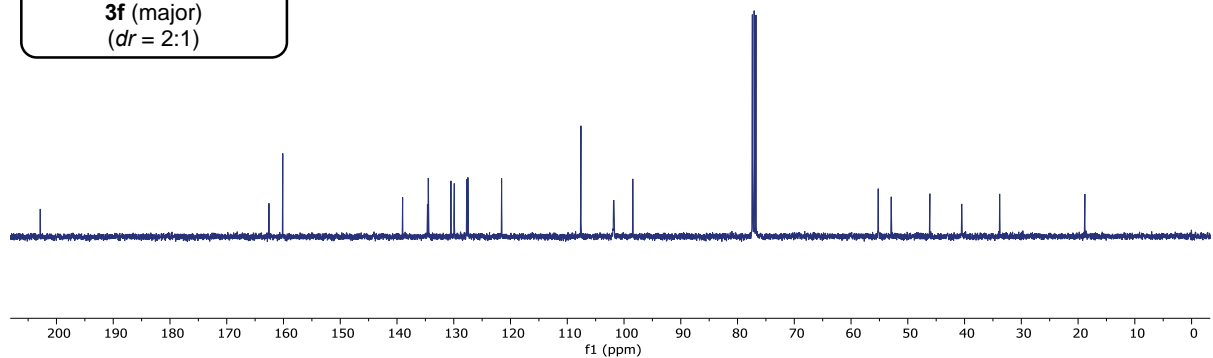



# <sup>1</sup>H NMR (400 MHz, CDCl<sub>3</sub>)

7.6857, 7.6827, 7.6803, 7.6739, 7.6714, 7.5879, 7.5852, 7.5827, 7.5687, 7.5662, 7.5635, 7.3729, 7.3640, 7.3612, 7.3530, 7.3446, 7.3426, 7.2833, 7.2433, 7.2282, 7.2234, 7.0690, 7.0506, 7.0472, 7.0147, 7.0091, 6.9840, 6.9043, 6.8978, 6.2107, 6.2062, 6.1910, 6.1866, 6.1046, 6.1001, 6.0849, 6.0805, 4.2996, 4.2922, 4.2800, 4.2727, 4.0968, 4.0693, 4.0771, 4.0697, 3.0168, 2.9704, 2.9490, 2.9276, 2.0756, 2.0650, 2.0555, 2.0447, 1.7287, 1.7179, 1.7062, 1.6953

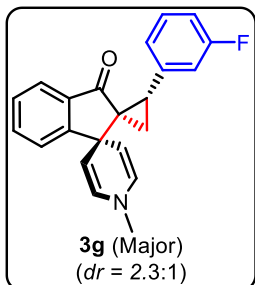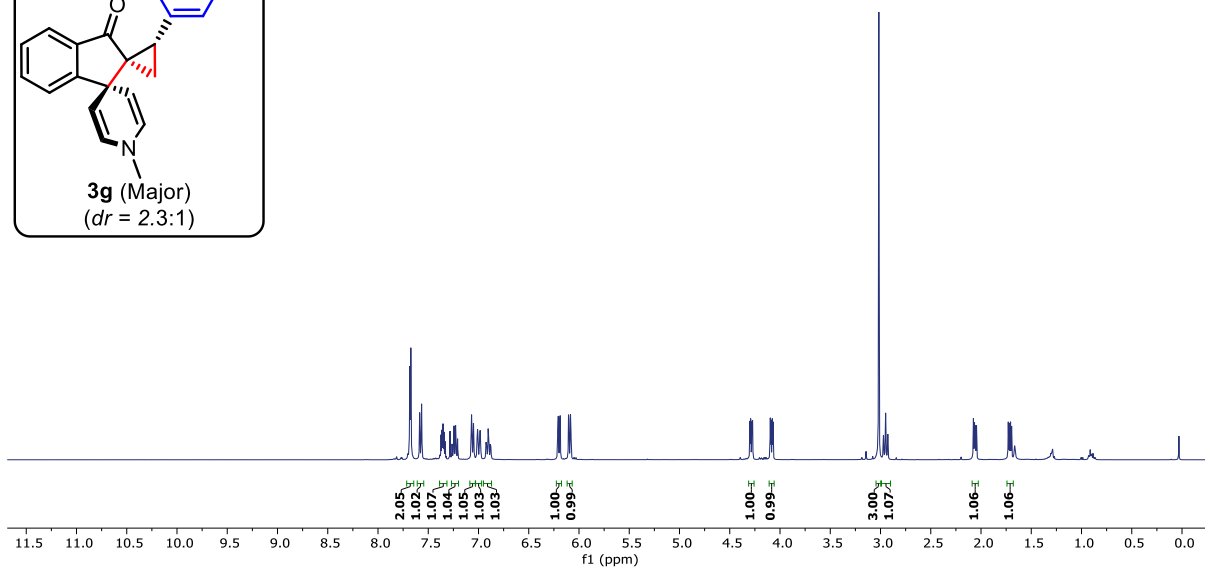

# <sup>13</sup>C NMR (100 MHz, CDCl<sub>3</sub>)

202.80, 163.70, 162.61, 161.26, 139.29, 139.22, 134.66, 134.47, 130.58, 130.02, 130.00, 129.09, 129.00, 127.78, 127.58, 124.97, 124.94, 121.58, 116.33, 116.12, 113.55, 113.34, 101.68, 53.00, 46.12, 40.51, 33.07, 18.74

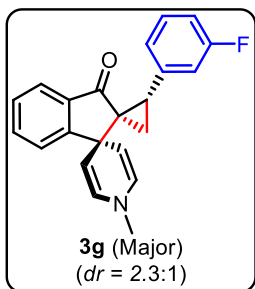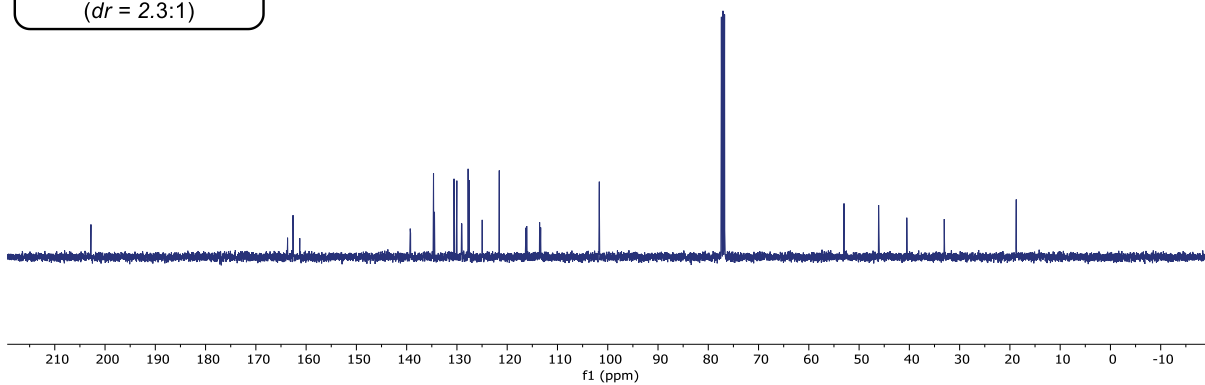

### $^{19}\text{F}$ NMR (376 MHz, $\text{CDCl}_3$ )

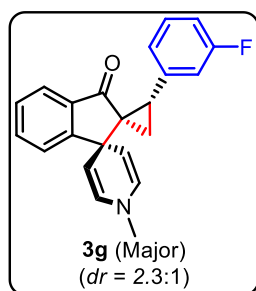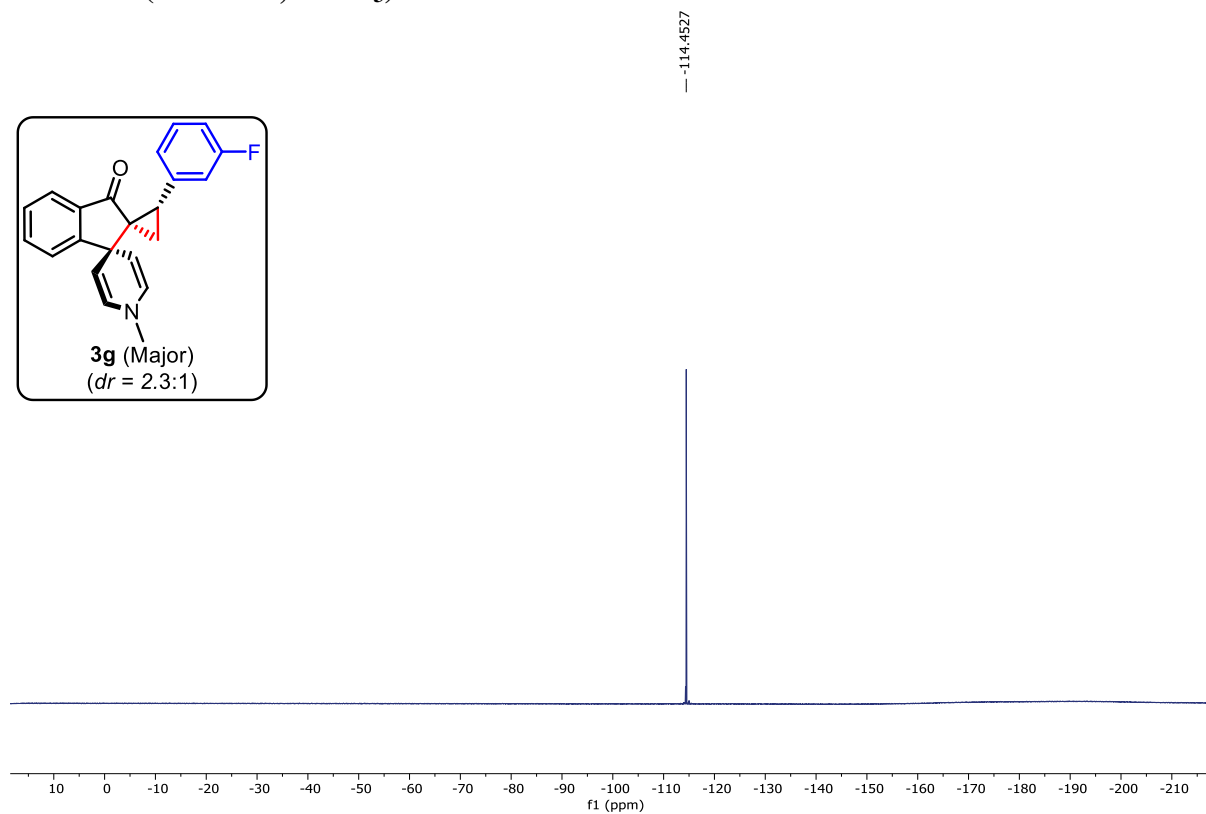

### $^1\text{H}$ NMR (400 MHz, $\text{CDCl}_3$ )

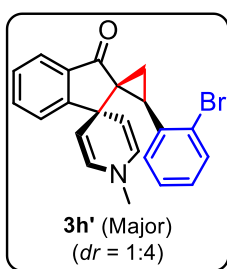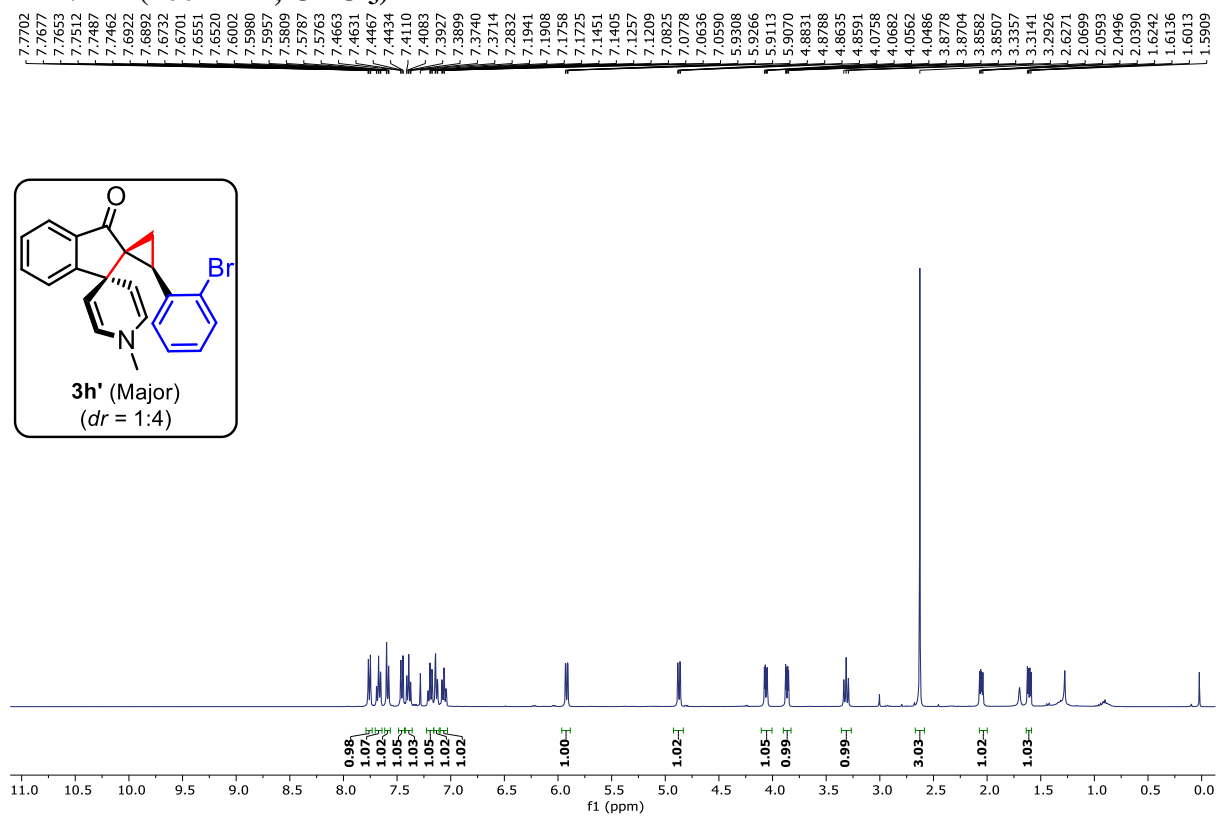

### <sup>13</sup>C NMR (100 MHz, CDCl<sub>3</sub>)

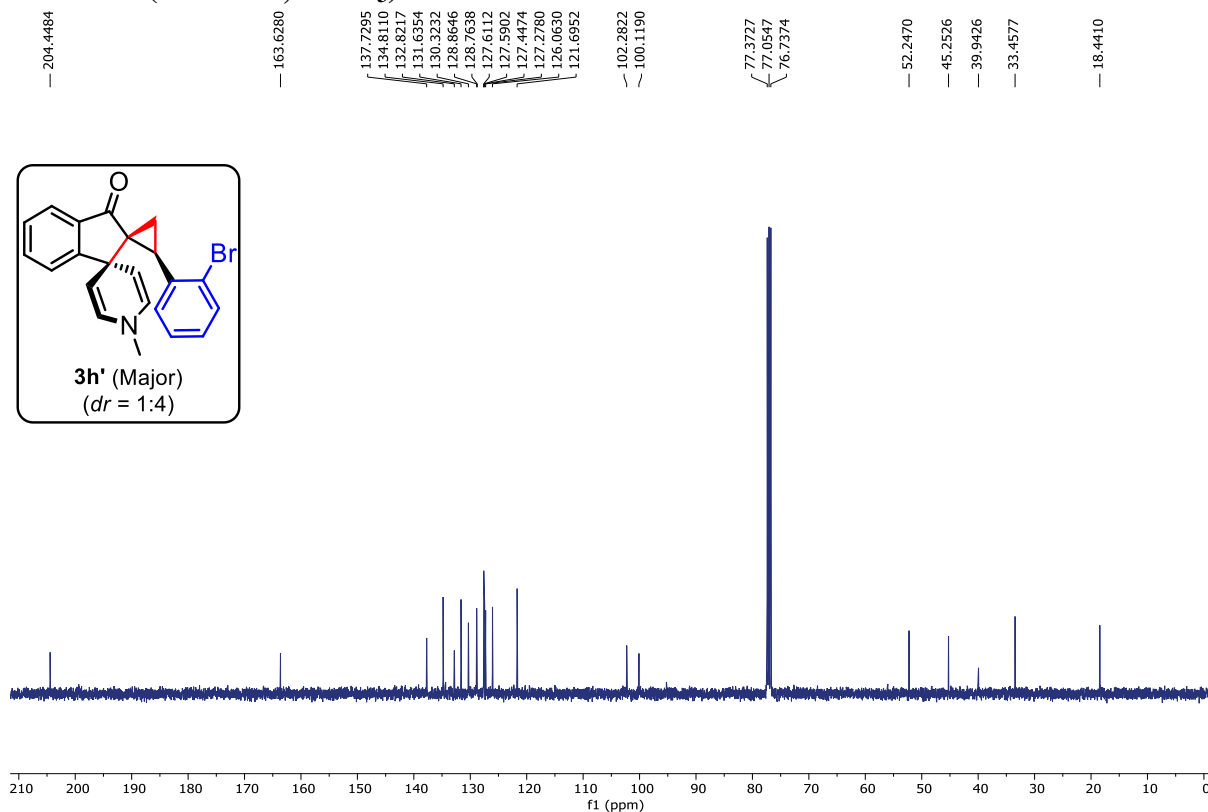

### <sup>1</sup>H NMR (400 MHz, CDCl<sub>3</sub>)

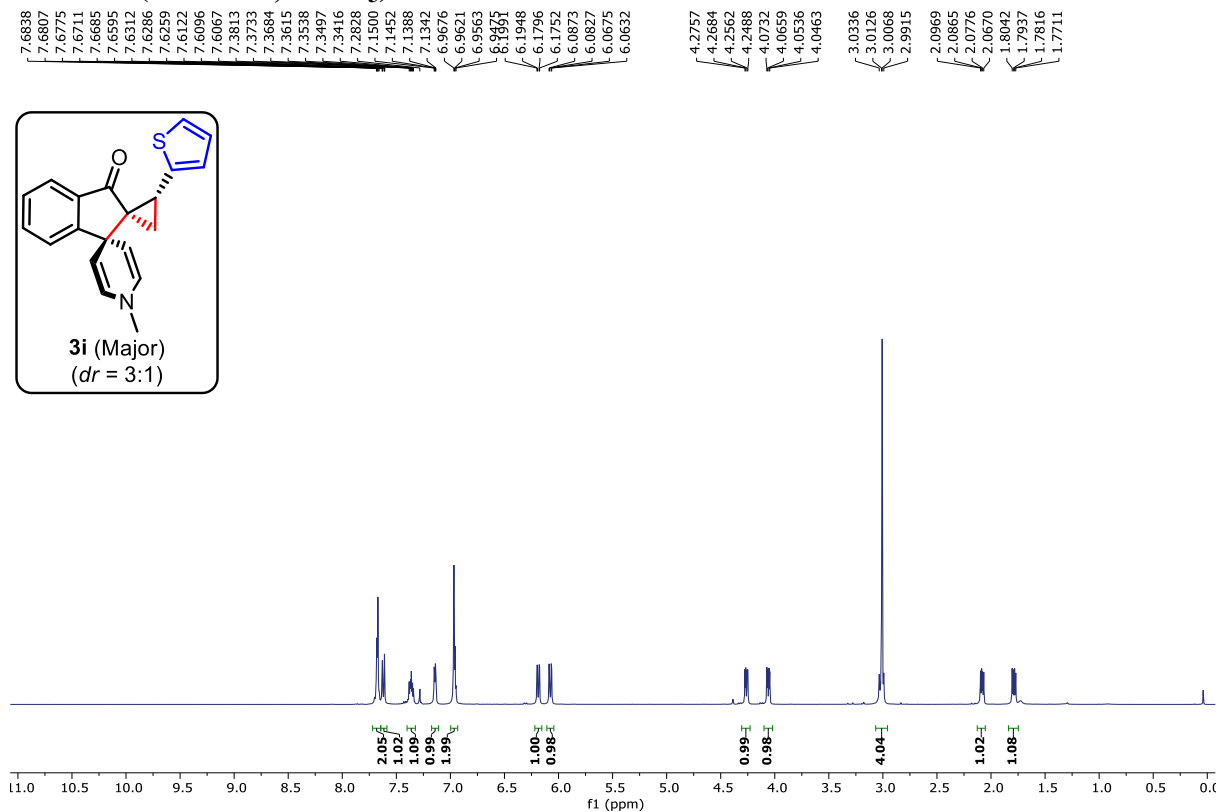

### <sup>13</sup>C NMR (100 MHz, CDCl<sub>3</sub>)

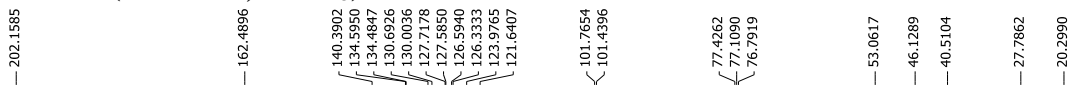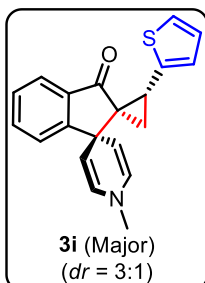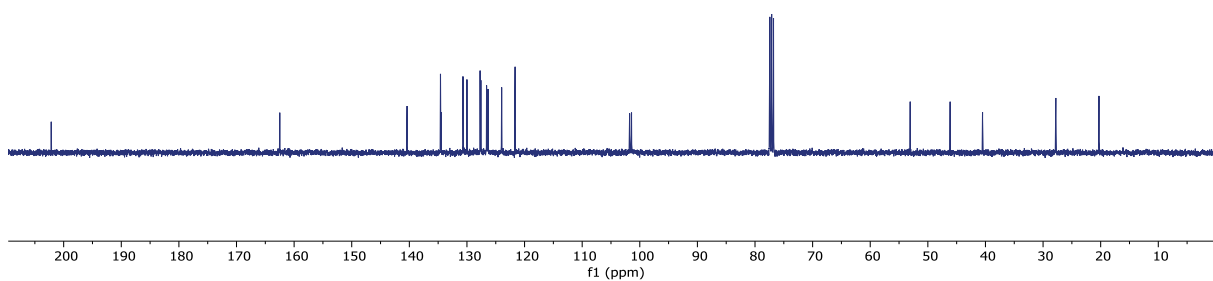

### <sup>1</sup>H NMR (400 MHz, CDCl<sub>3</sub>)

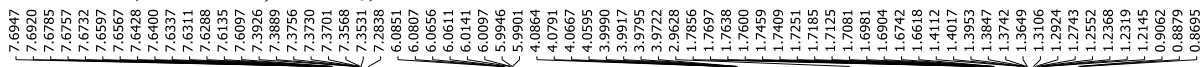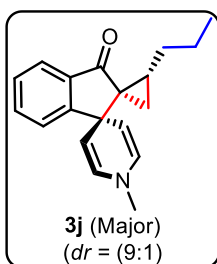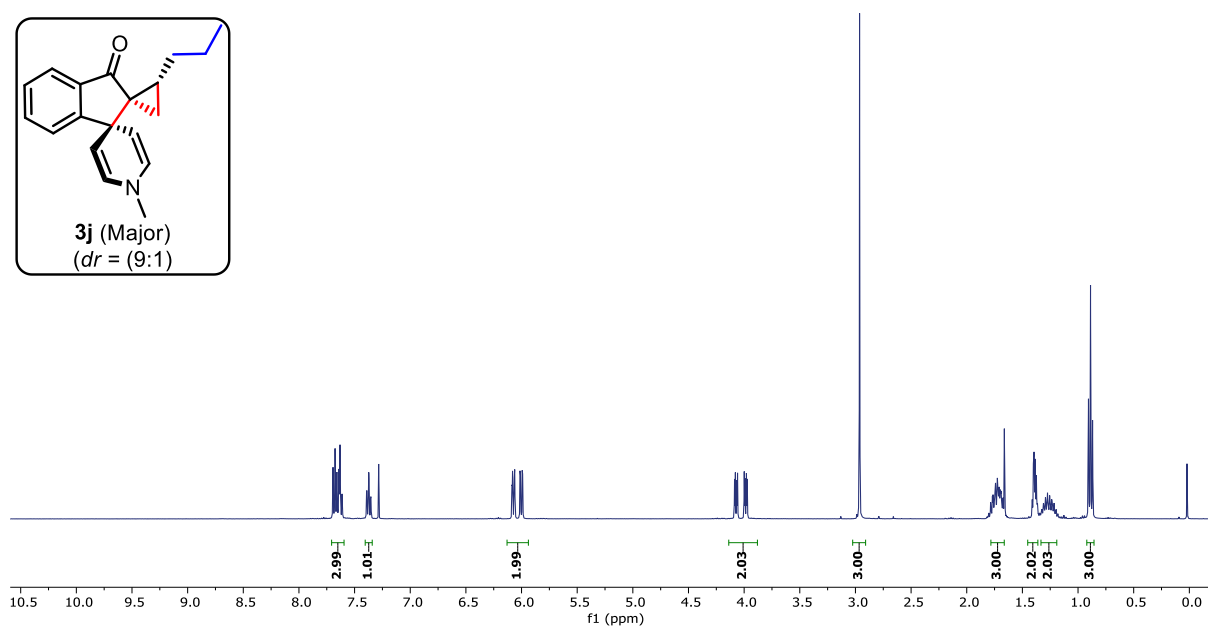

### <sup>13</sup>C NMR (100 MHz, CDCl<sub>3</sub>)

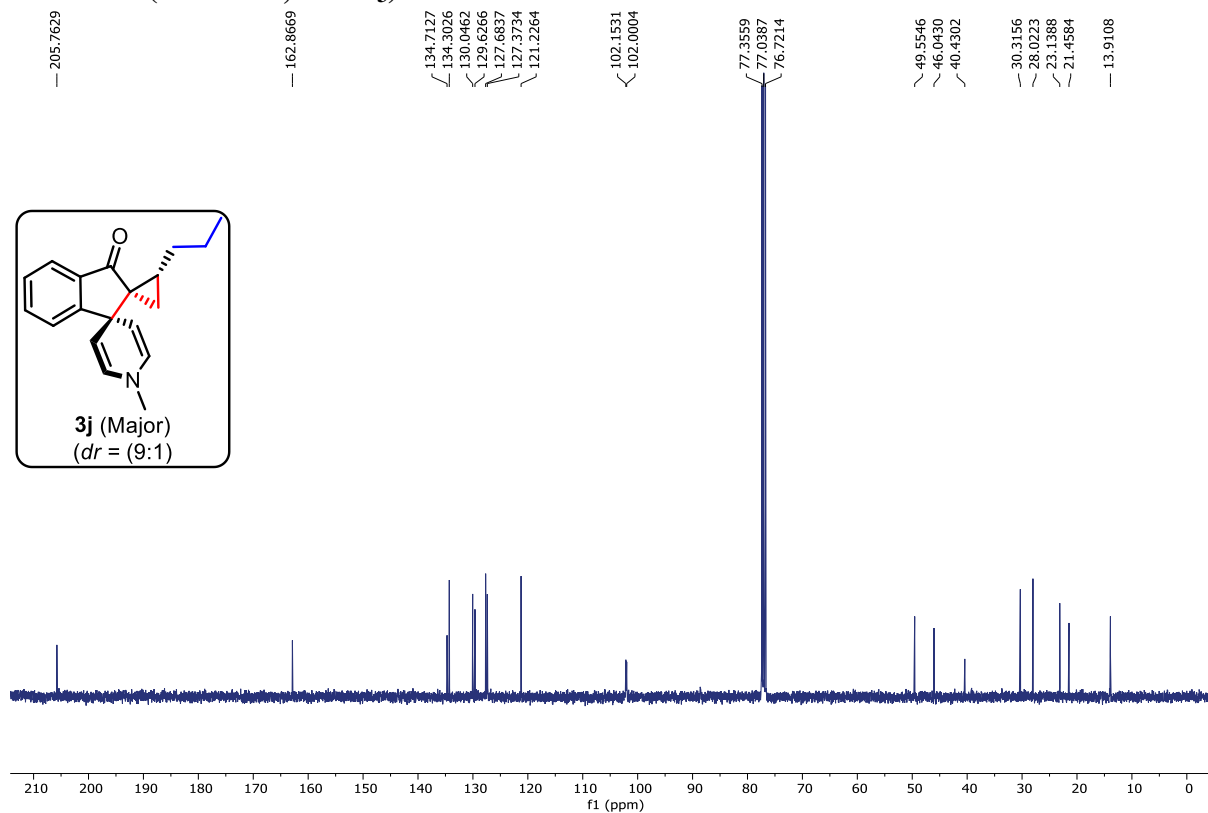

### <sup>1</sup>H NMR (500 MHz, CDCl<sub>3</sub>)

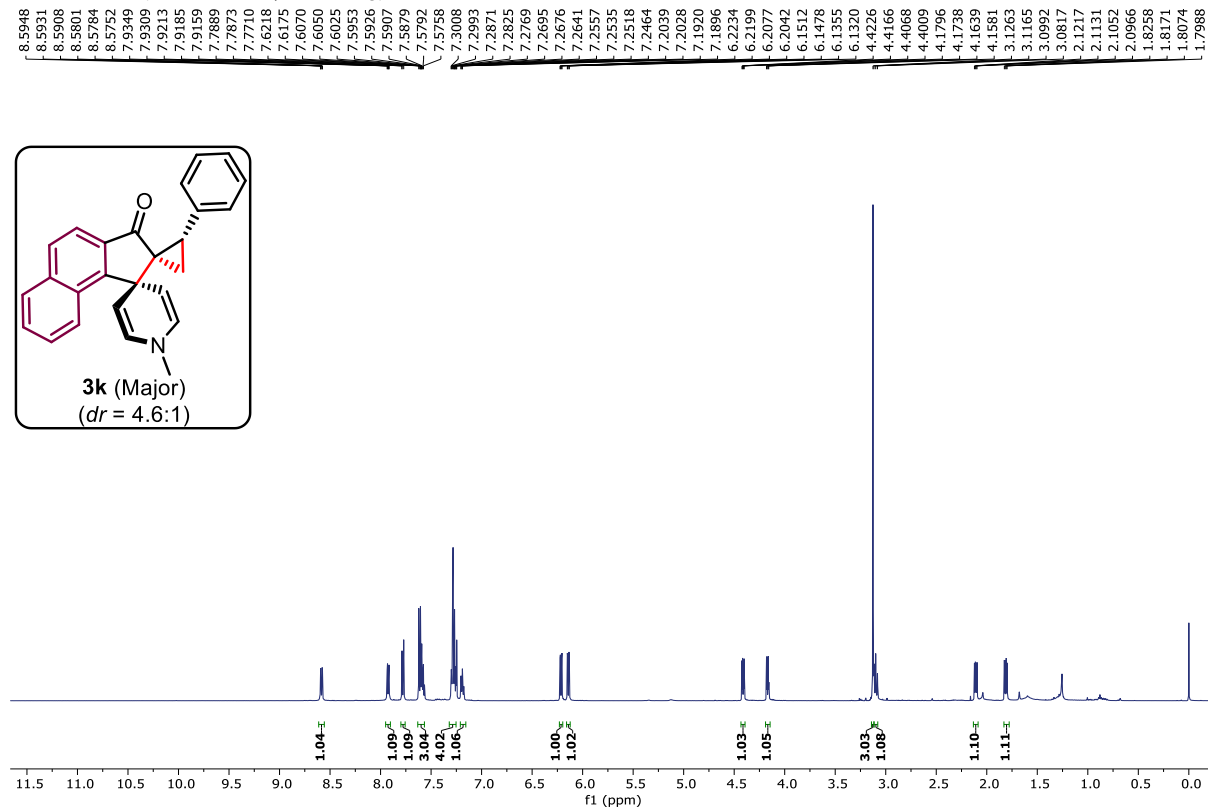

### $^{13}\text{C}$ NMR (125 MHz, $\text{CDCl}_3$ )

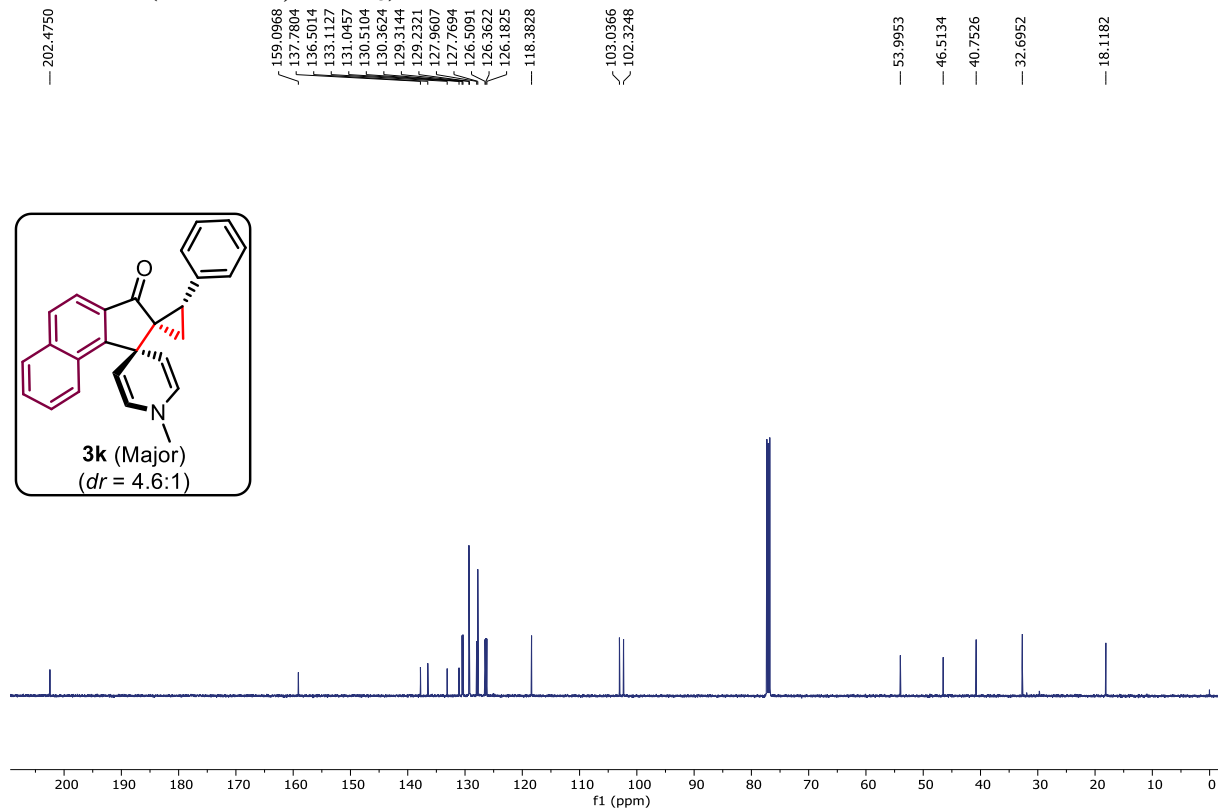

### $^1\text{H}$ NMR (500 MHz, $\text{CDCl}_3$ )

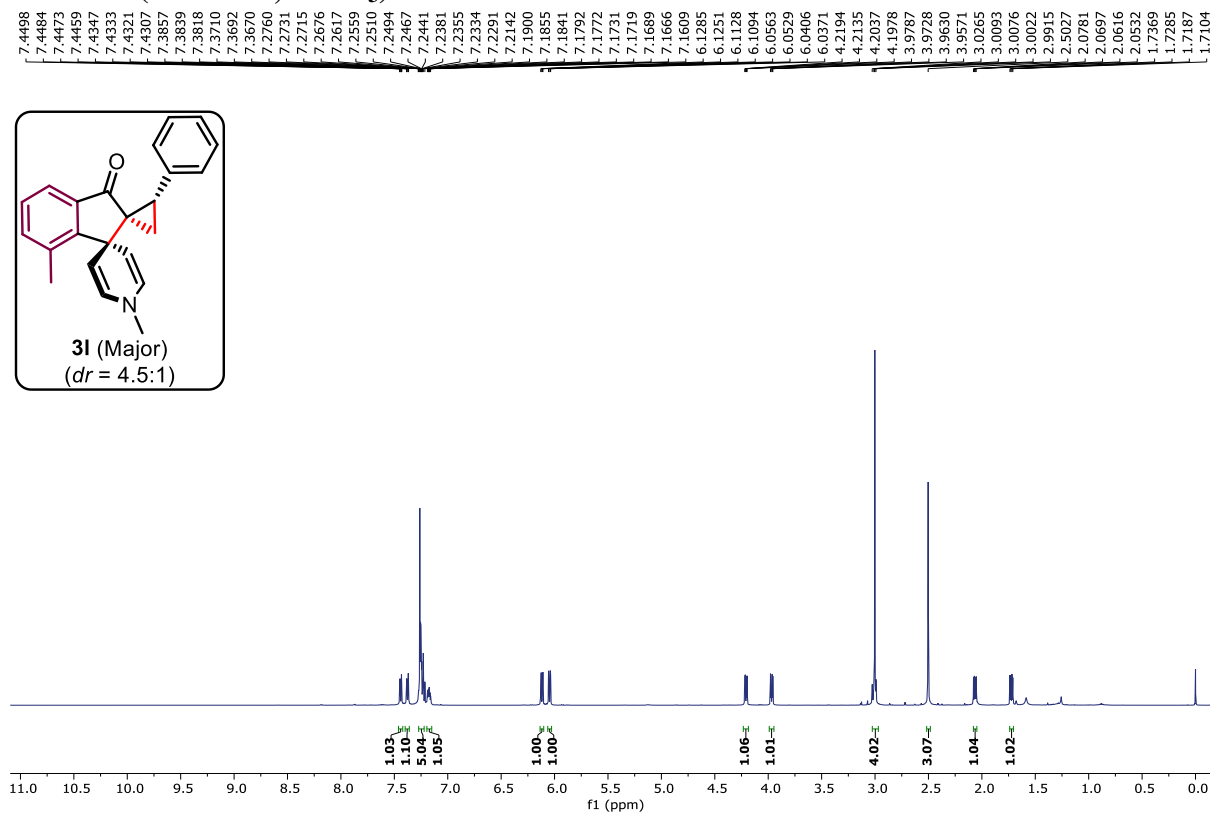

### <sup>13</sup>C NMR (125 MHz, CDCl<sub>3</sub>)

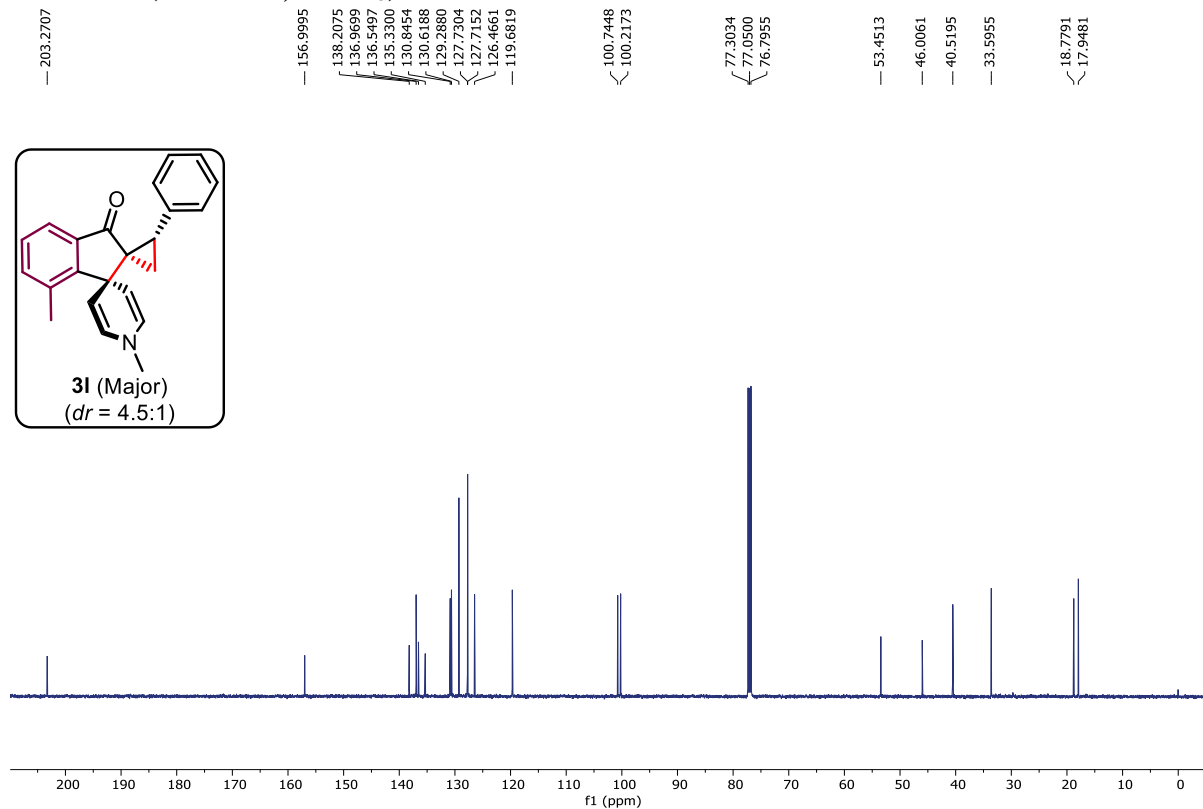

### <sup>1</sup>H NMR (400 MHz, CDCl<sub>3</sub>)

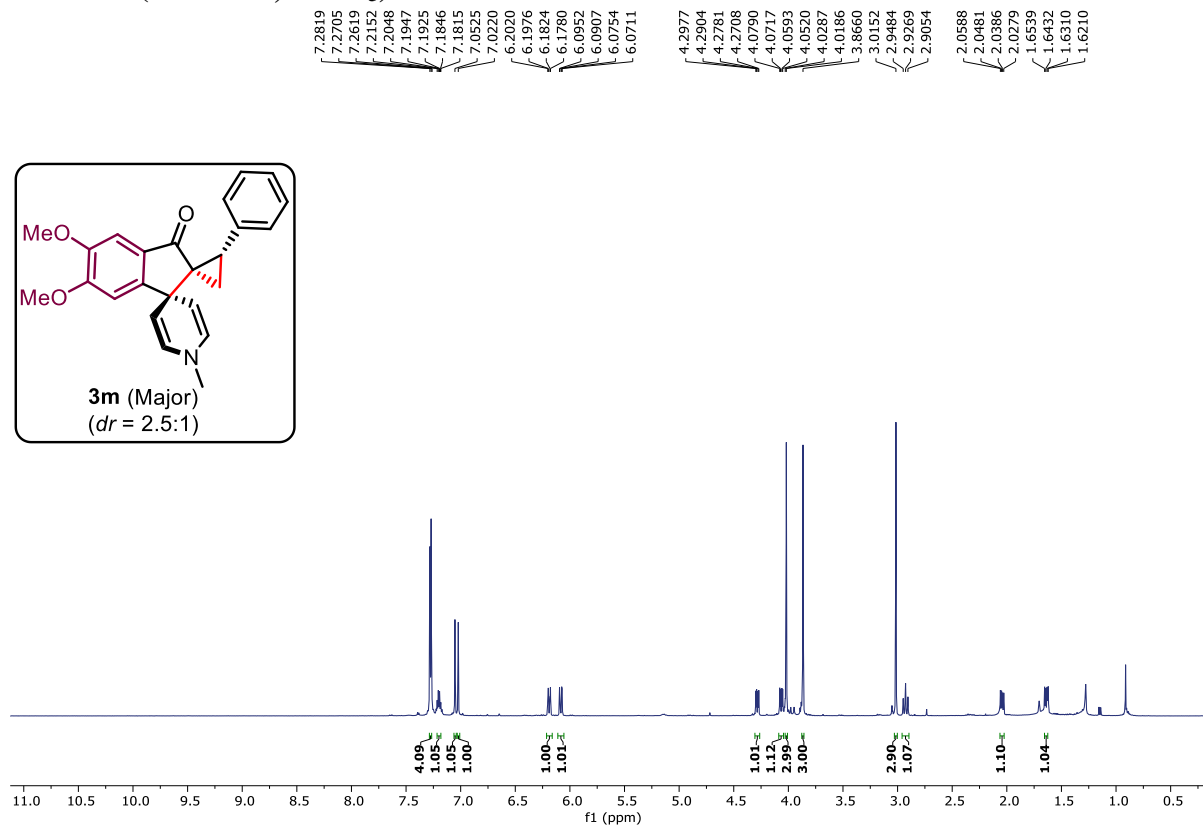

### <sup>13</sup>C NMR 100 MHz, CDCl<sub>3</sub>

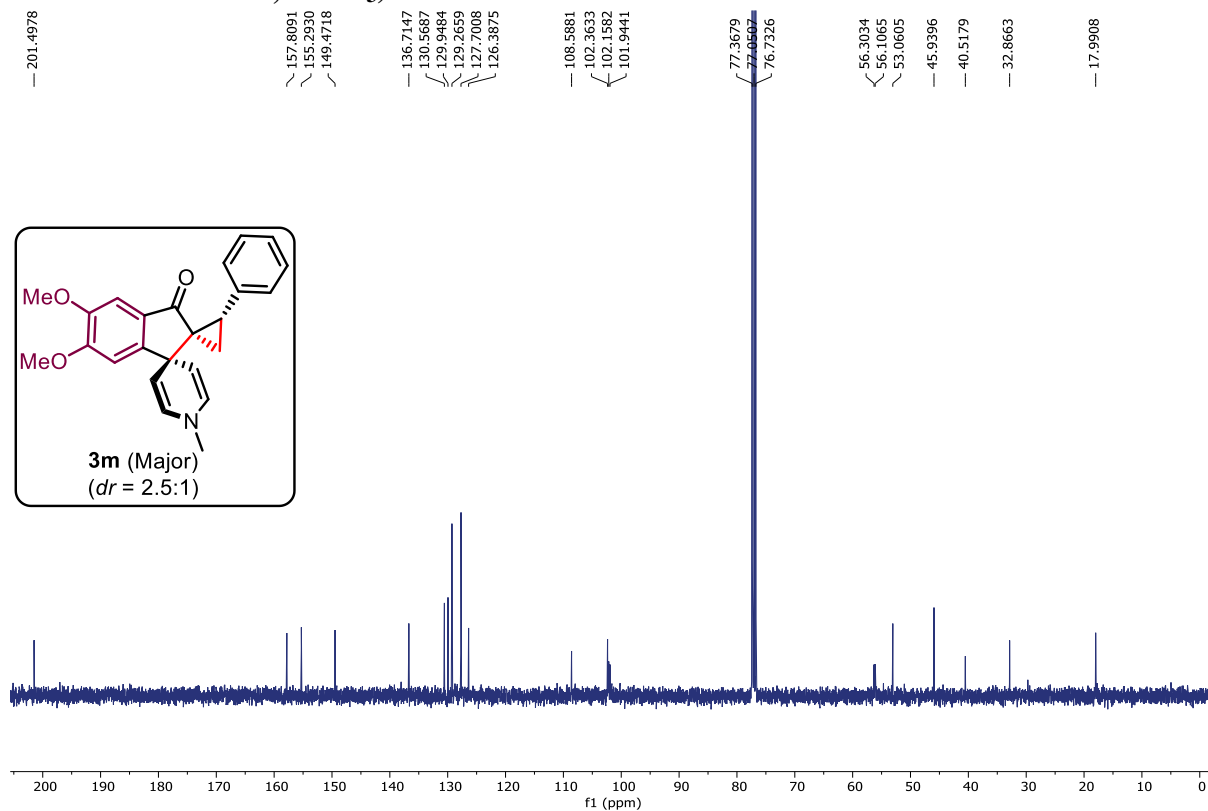

### <sup>1</sup>H NMR (500 MHz, CDCl<sub>3</sub>)

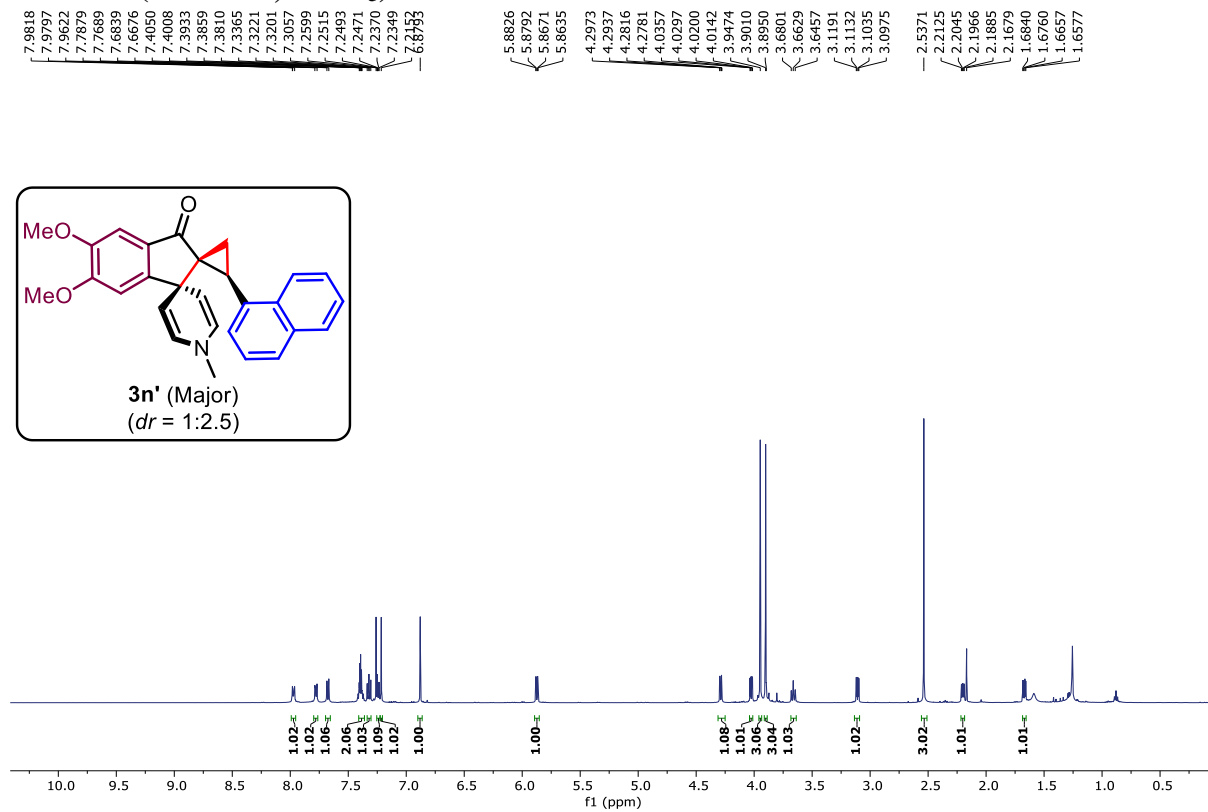



### <sup>13</sup>C NMR (125 MHz, CDCl<sub>3</sub>)

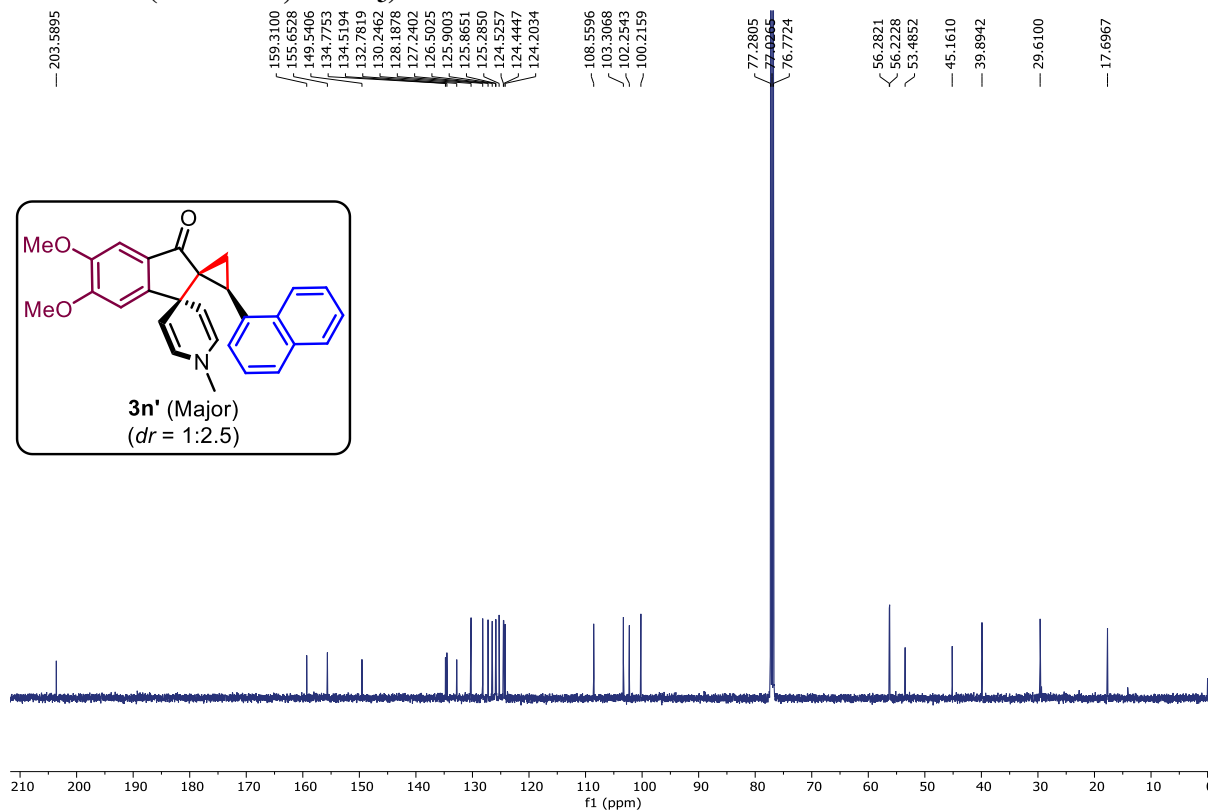

### <sup>1</sup>H NMR (400 MHz, CDCl<sub>3</sub>)

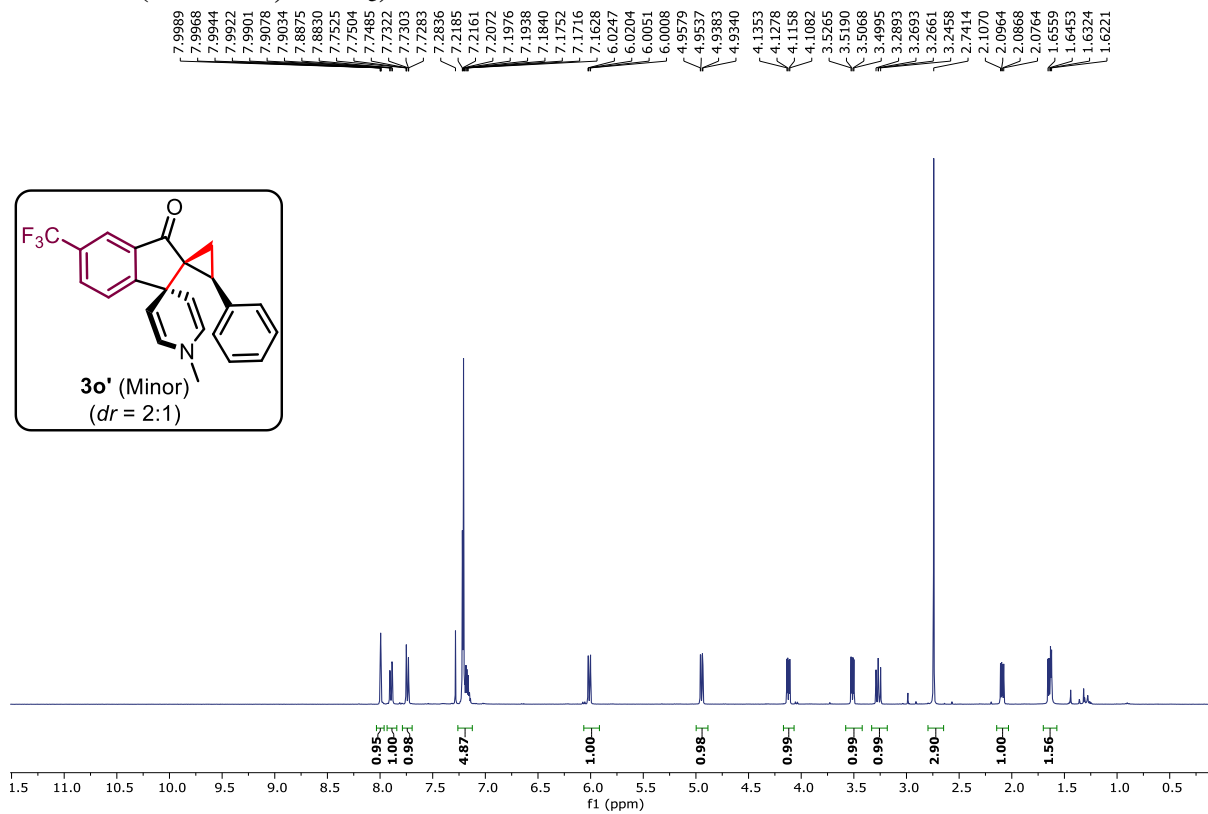

### $^{13}\text{C}$ NMR (100 MHz, $\text{CDCl}_3$ )

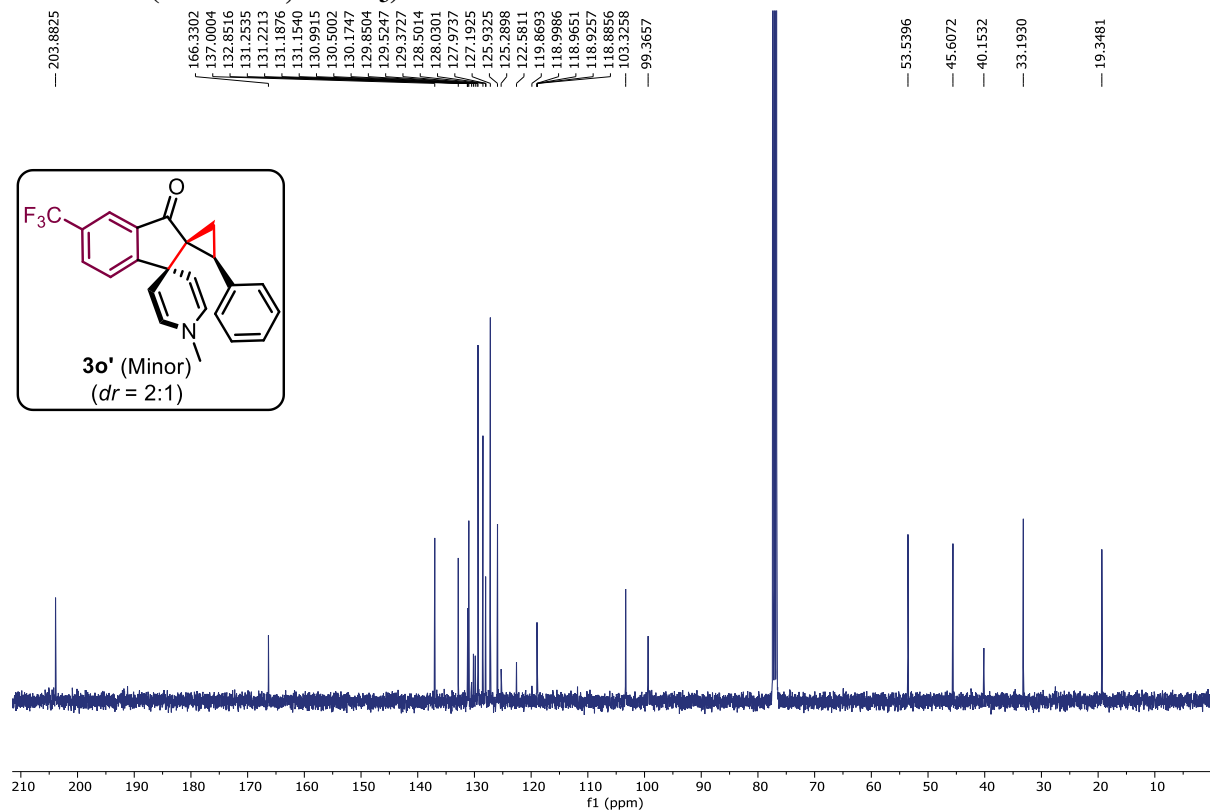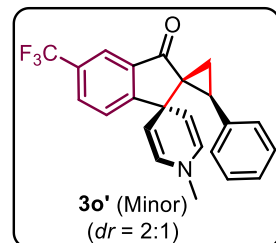

### $^{19}\text{F}$ NMR (376 MHz, $\text{CDCl}_3$ )

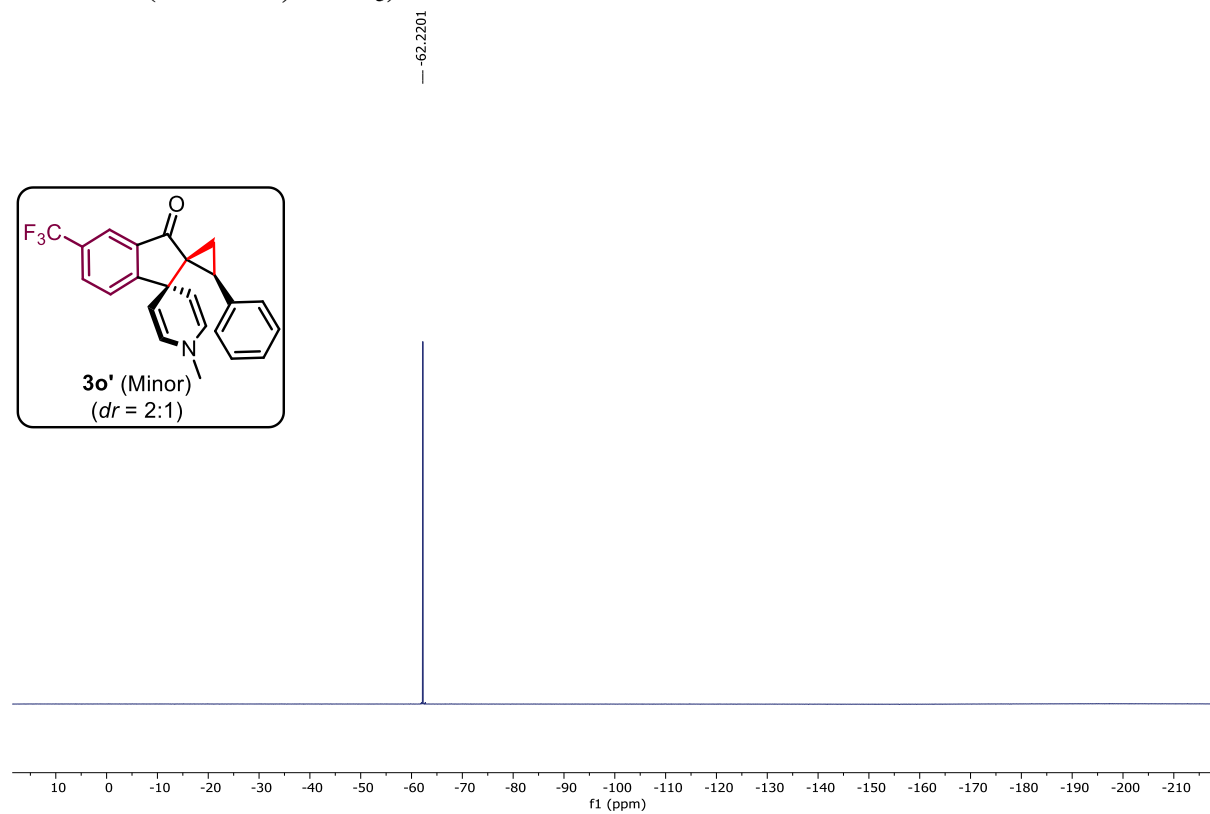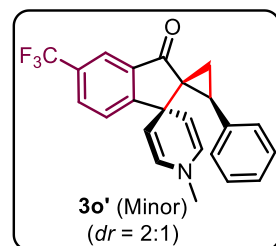

# <sup>1</sup>H NMR (400 MHz, CDCl<sub>3</sub>)

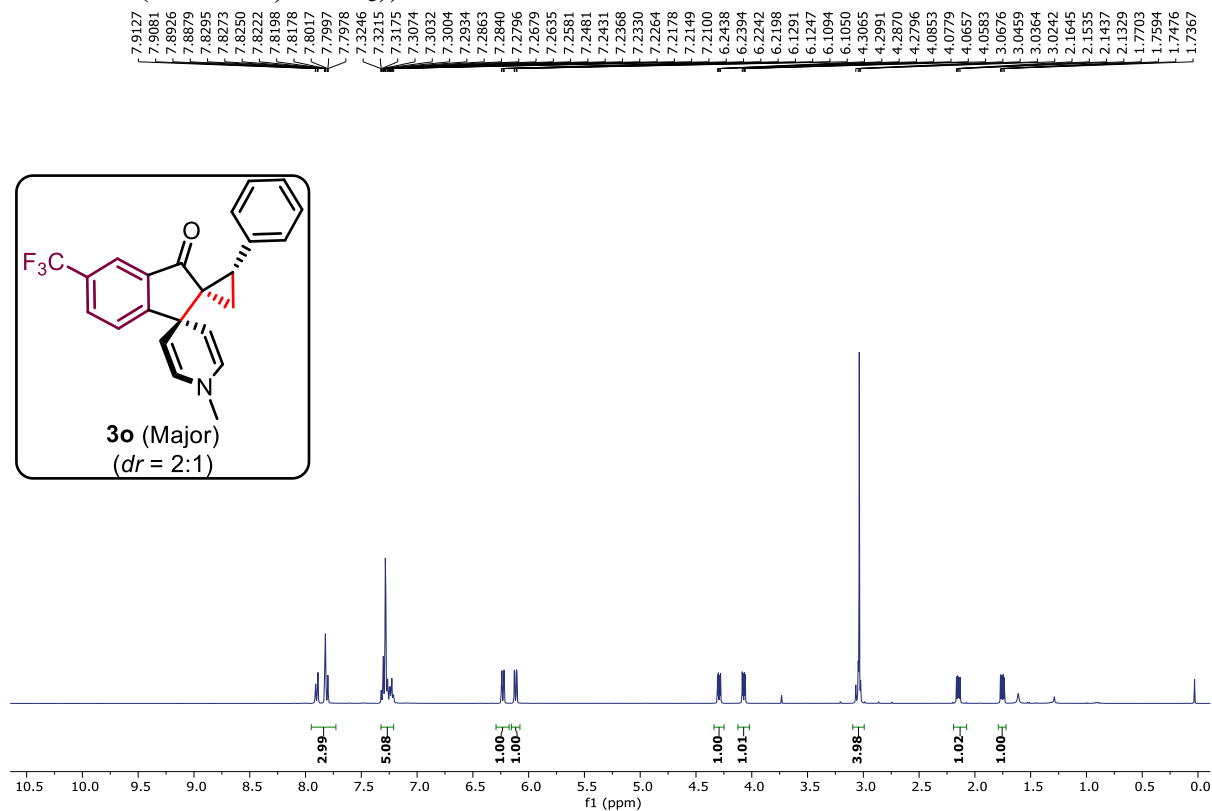

# <sup>13</sup>C NMR (100 MHz, CDCl<sub>3</sub>)

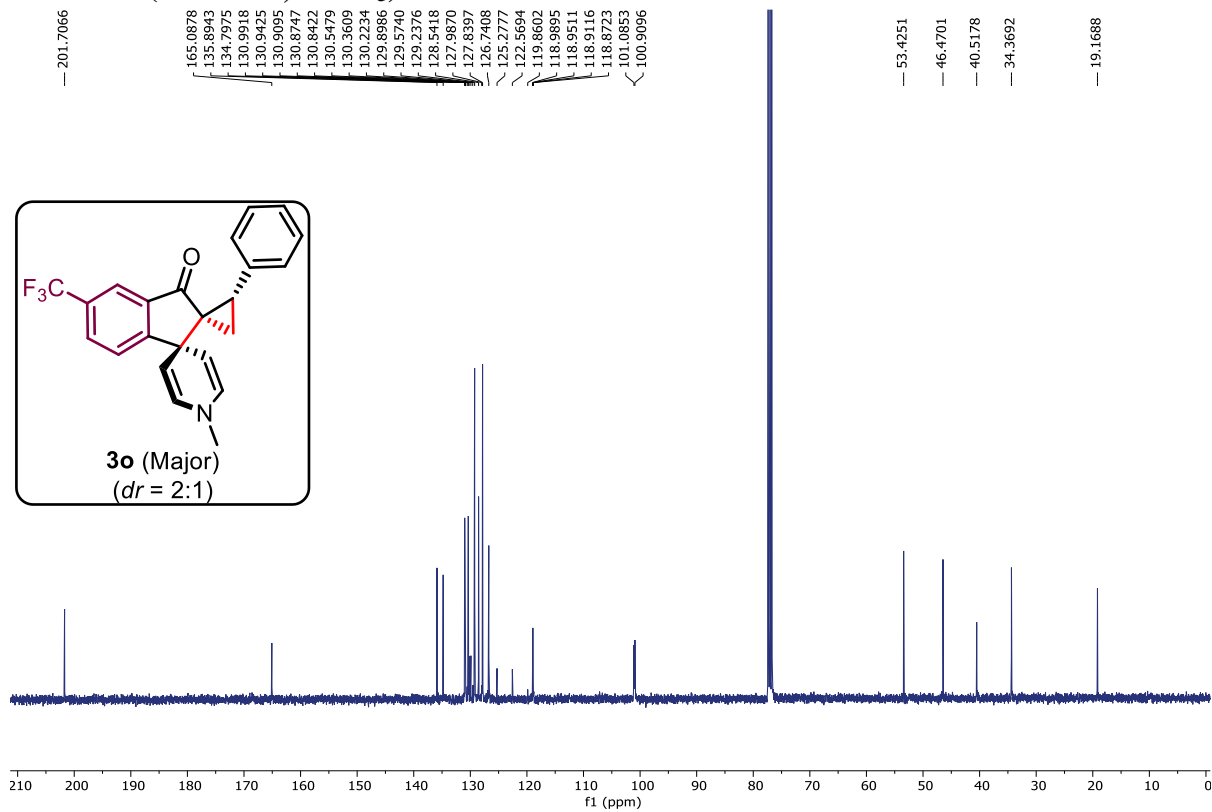

# $^{19}\text{F}$ NMR (376 MHz, $\text{CDCl}_3$ )

--- -62.2800

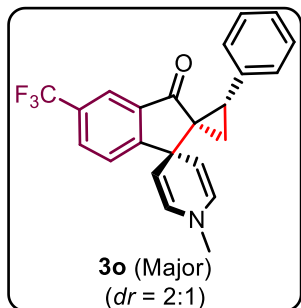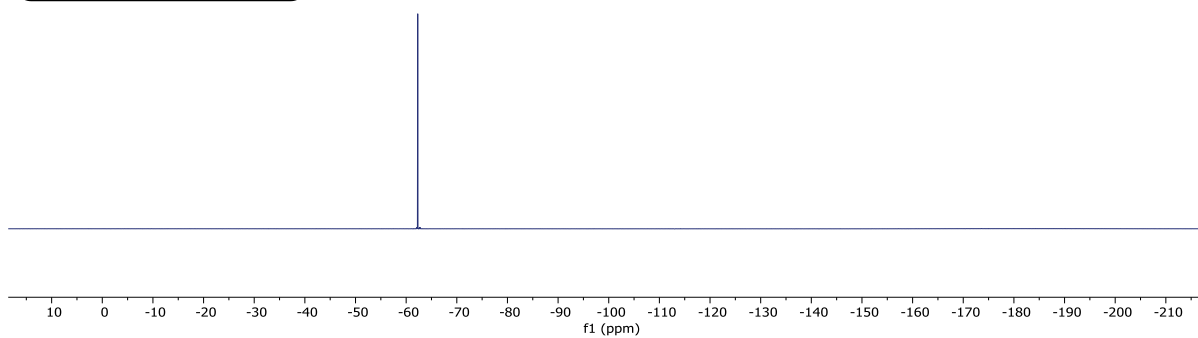

# $^1\text{H}$ NMR (500 MHz, $\text{CDCl}_3$ )

8.0287, 8.0086, 7.8836, 7.8635, 7.4599, 7.4101, 7.3092, 7.2701, 7.2587, 7.2517, 7.2128, 7.1818, 6.2436, 6.2401, 6.2279, 6.2245, 6.1705, 6.1670, 6.1548, 6.1514, 4.4003, 4.3944, 4.3847, 4.3787, 4.1599, 4.1541, 4.1442, 4.1384, 3.0976, 3.0165, 2.9990, 2.9814, 2.0650, 2.0558, 2.0484, 2.0434, 2.0394, 1.7558, 1.7467, 1.7372, 1.7281

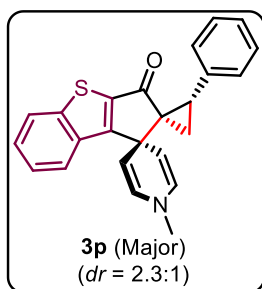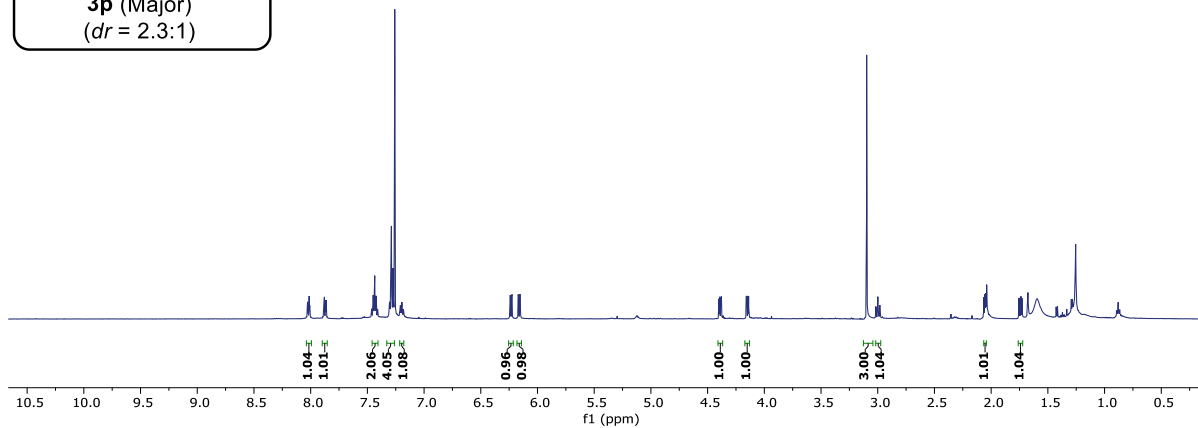

### <sup>13</sup>C NMR (125 MHz, CDCl<sub>3</sub>)

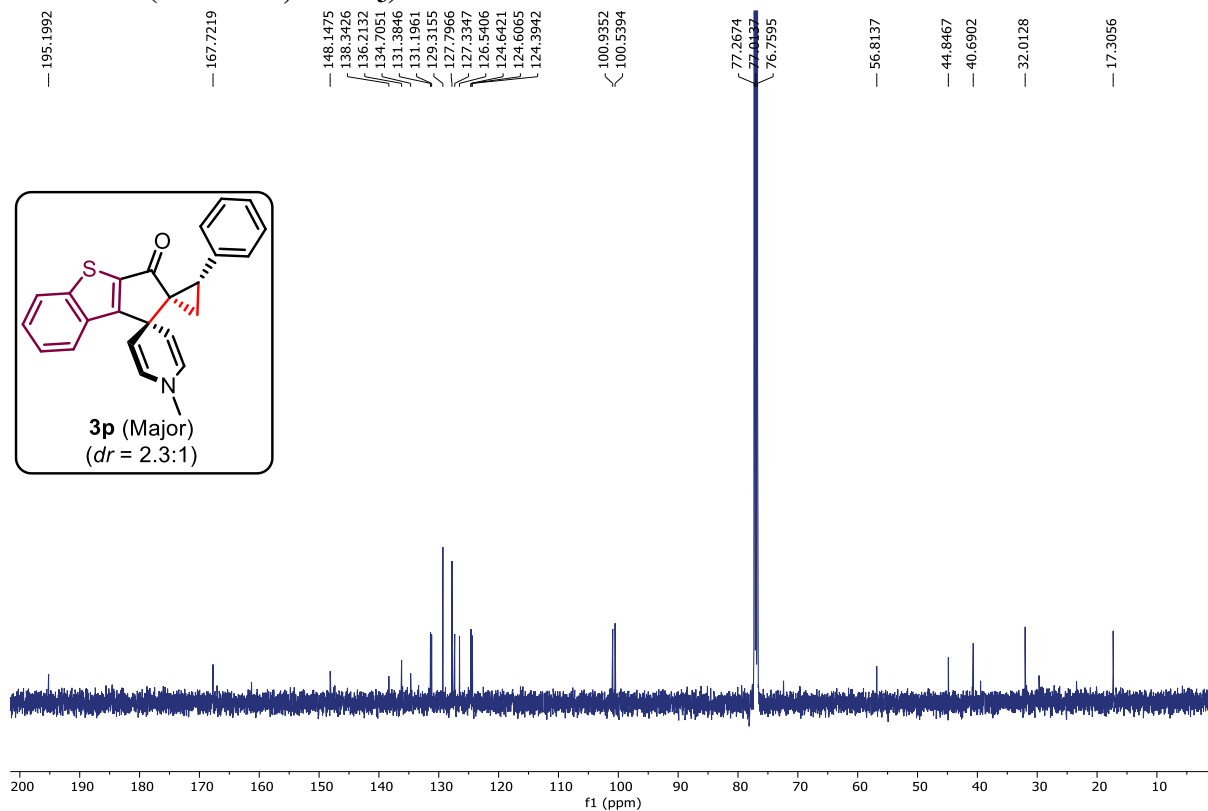

### <sup>1</sup>H NMR (500 MHz, CDCl<sub>3</sub>)

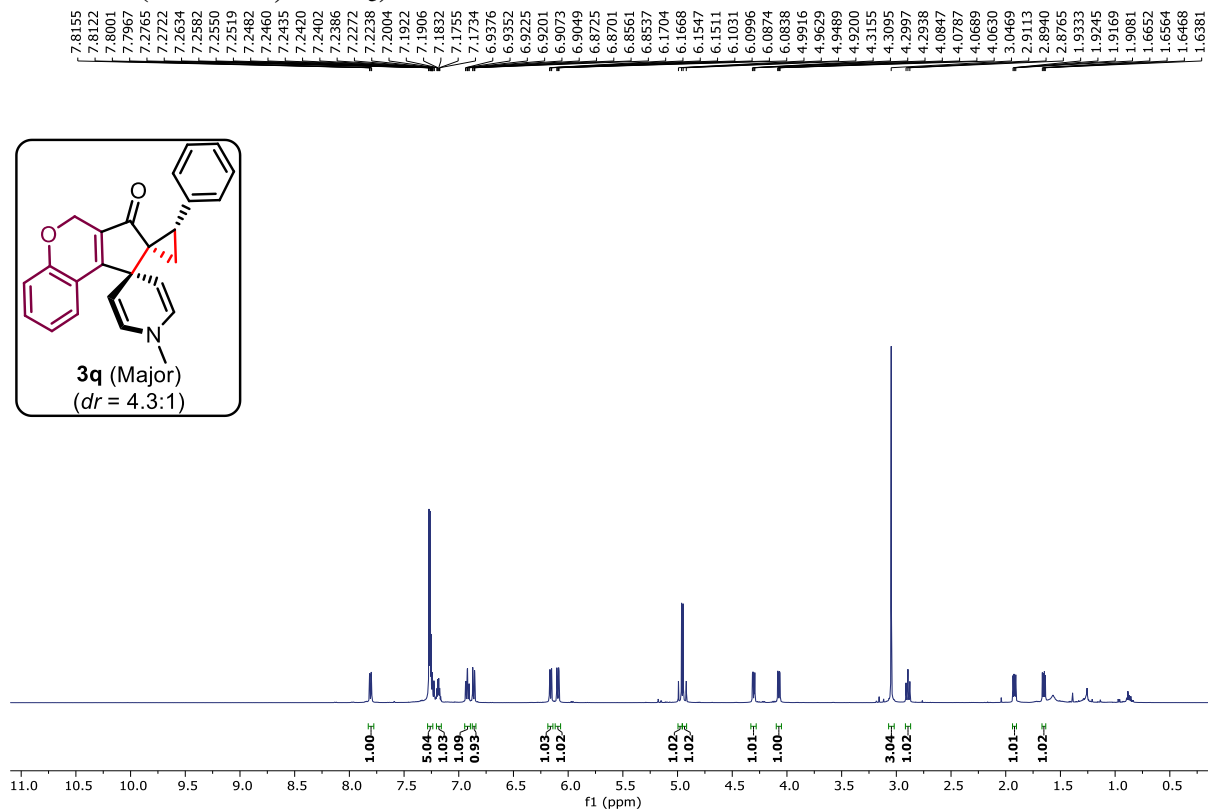

### <sup>13</sup>C NMR (125 MHz, CDCl<sub>3</sub>)

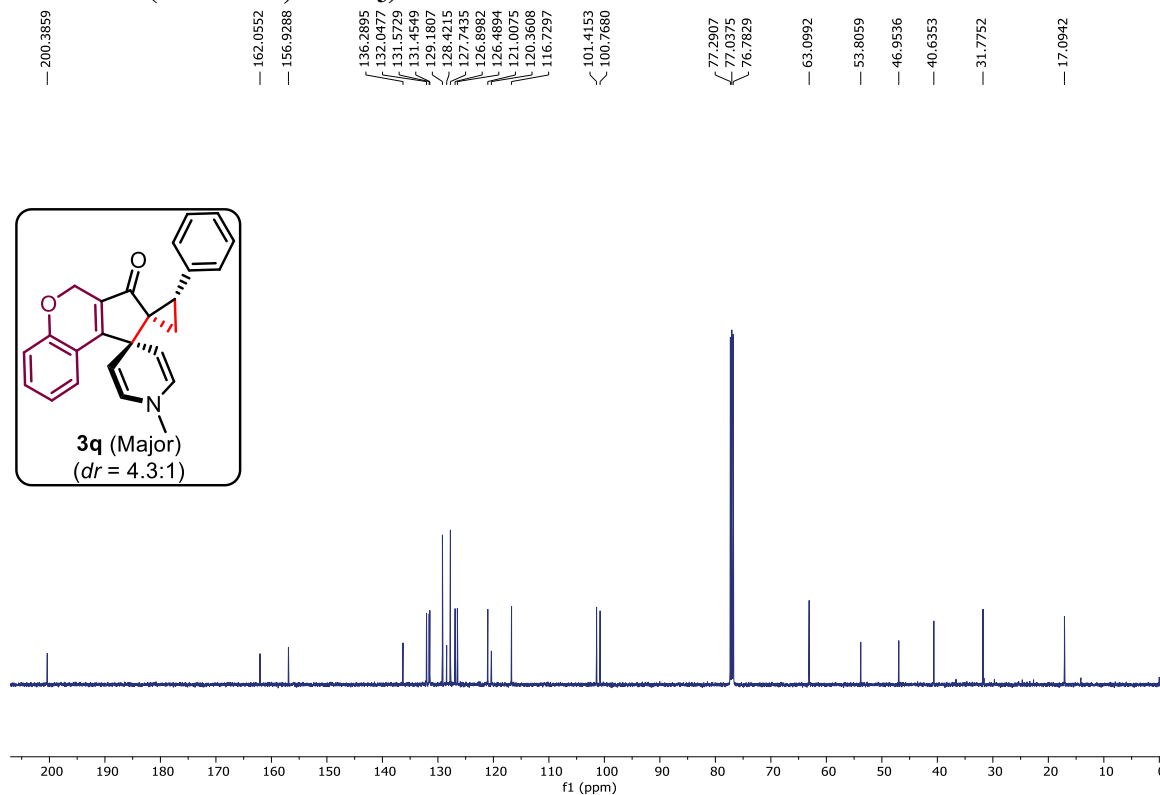

### <sup>1</sup>H NMR (500 MHz, CDCl<sub>3</sub>)

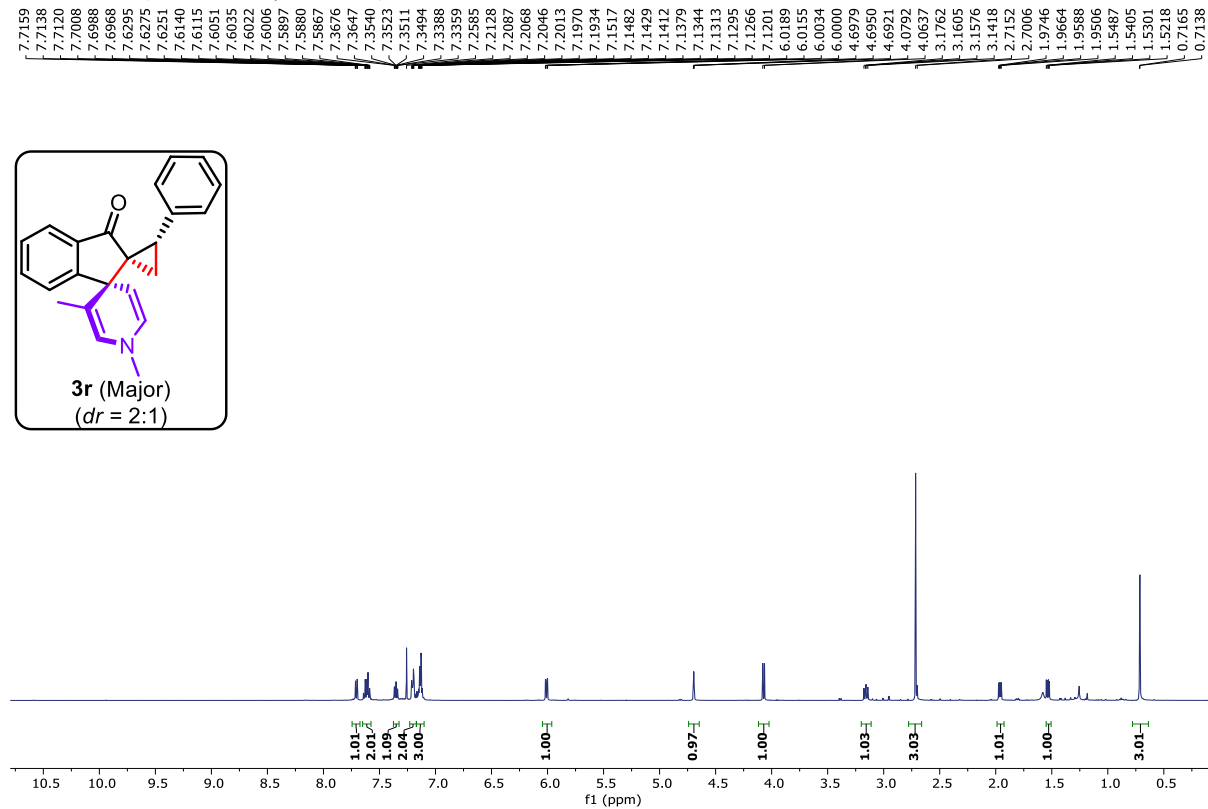

### <sup>13</sup>C NMR (125 MHz, CDCl<sub>3</sub>)

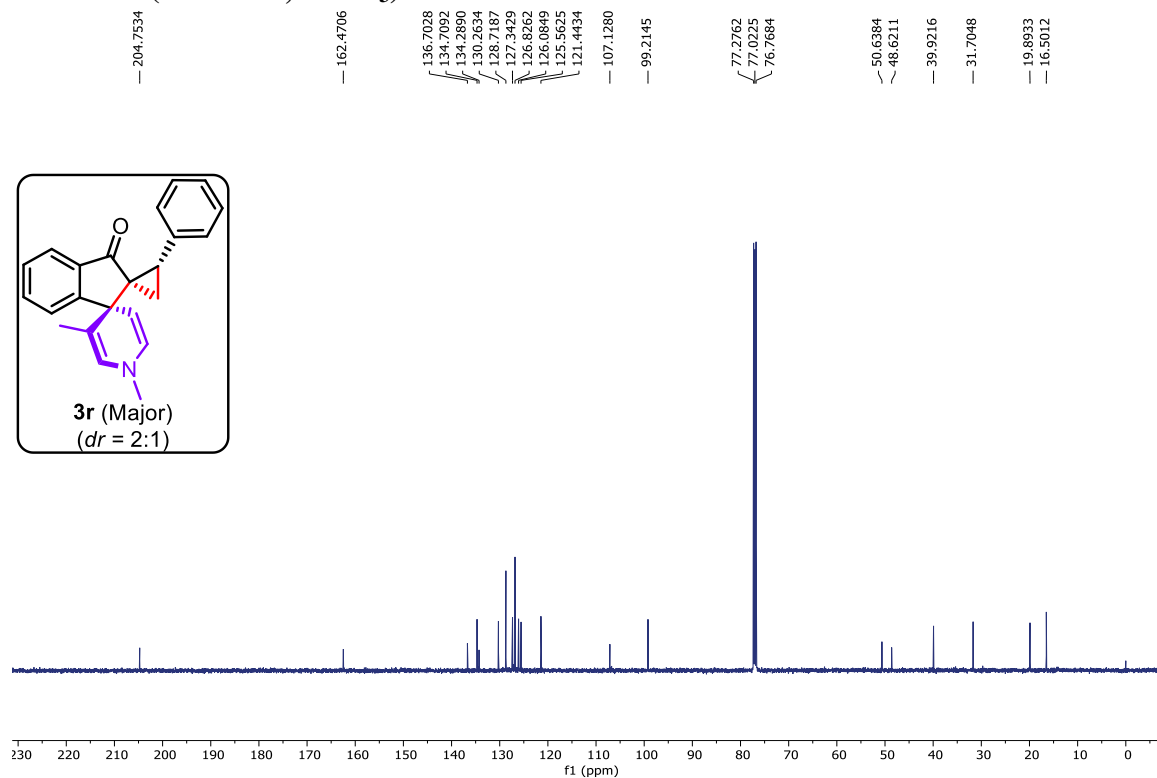

### <sup>1</sup>H NMR (500 MHz, CDCl<sub>3</sub>)

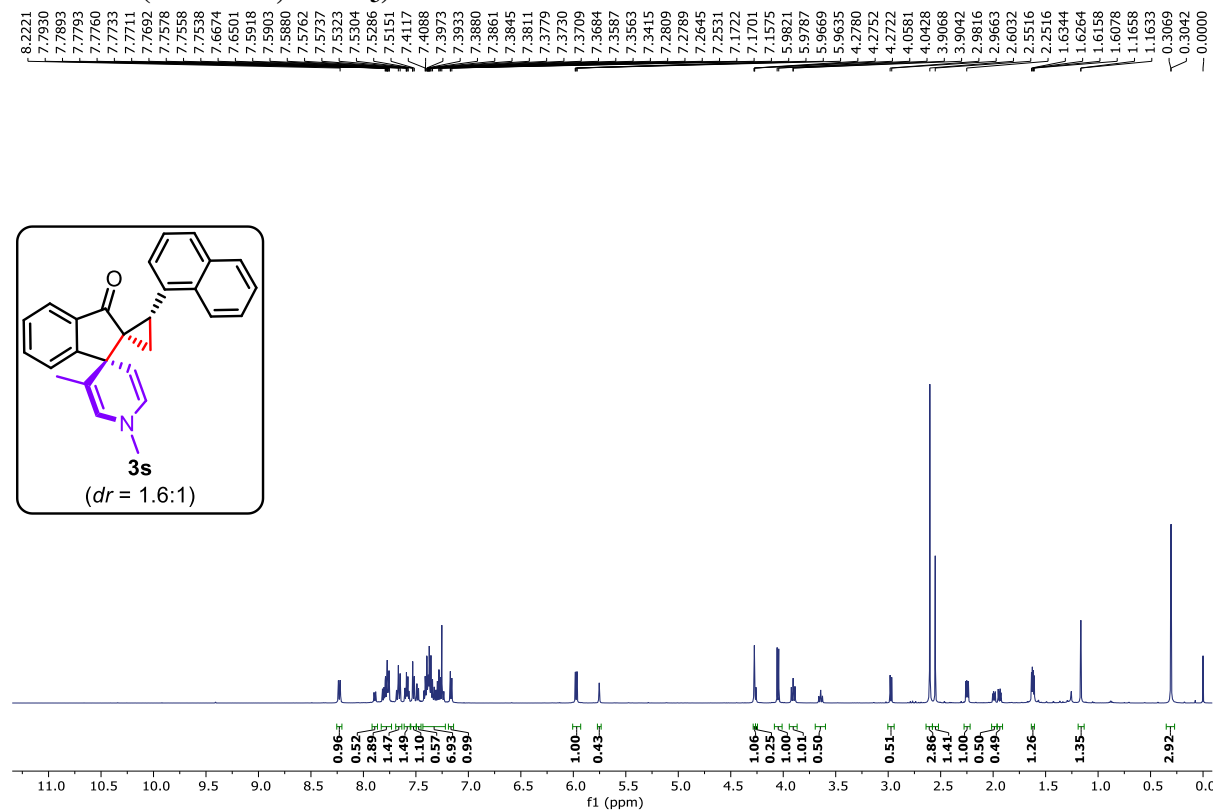

### <sup>13</sup>C NMR (125 MHz, CDCl<sub>3</sub>)

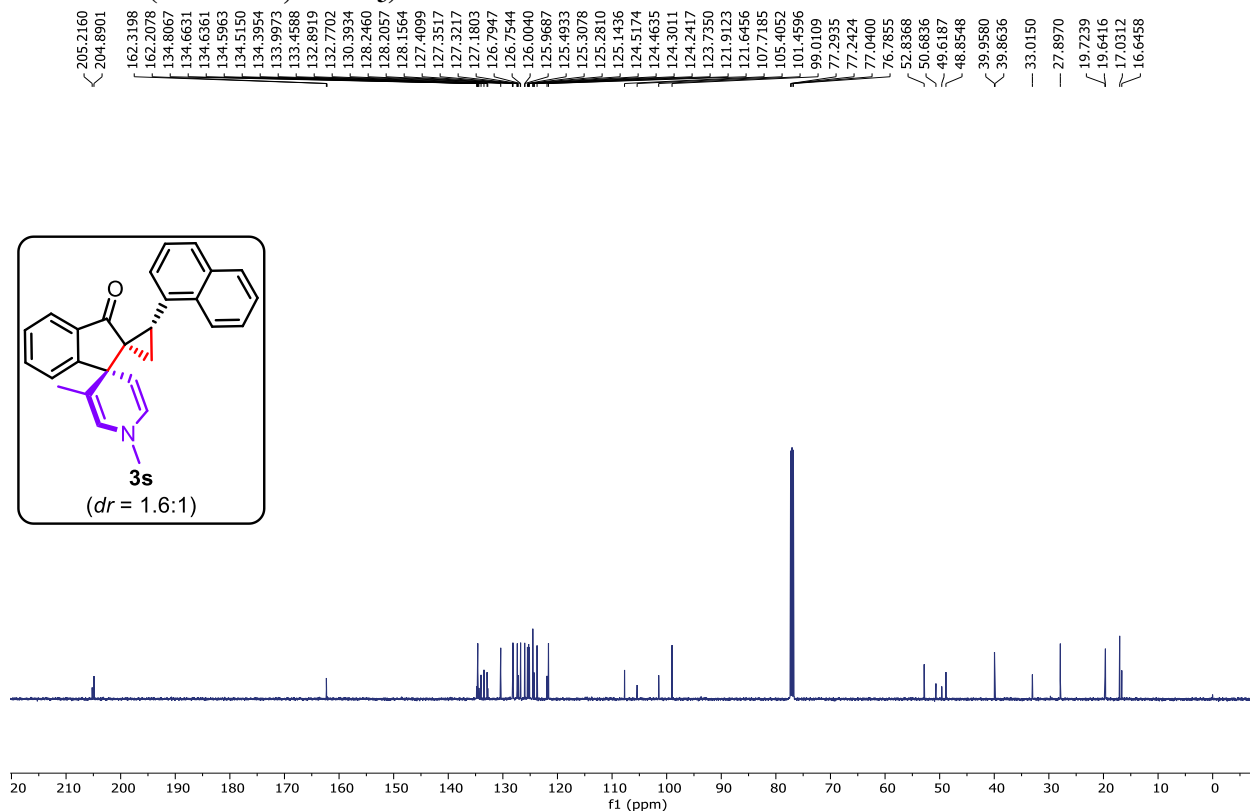

### <sup>1</sup>H NMR (500 MHz, CDCl<sub>3</sub>)

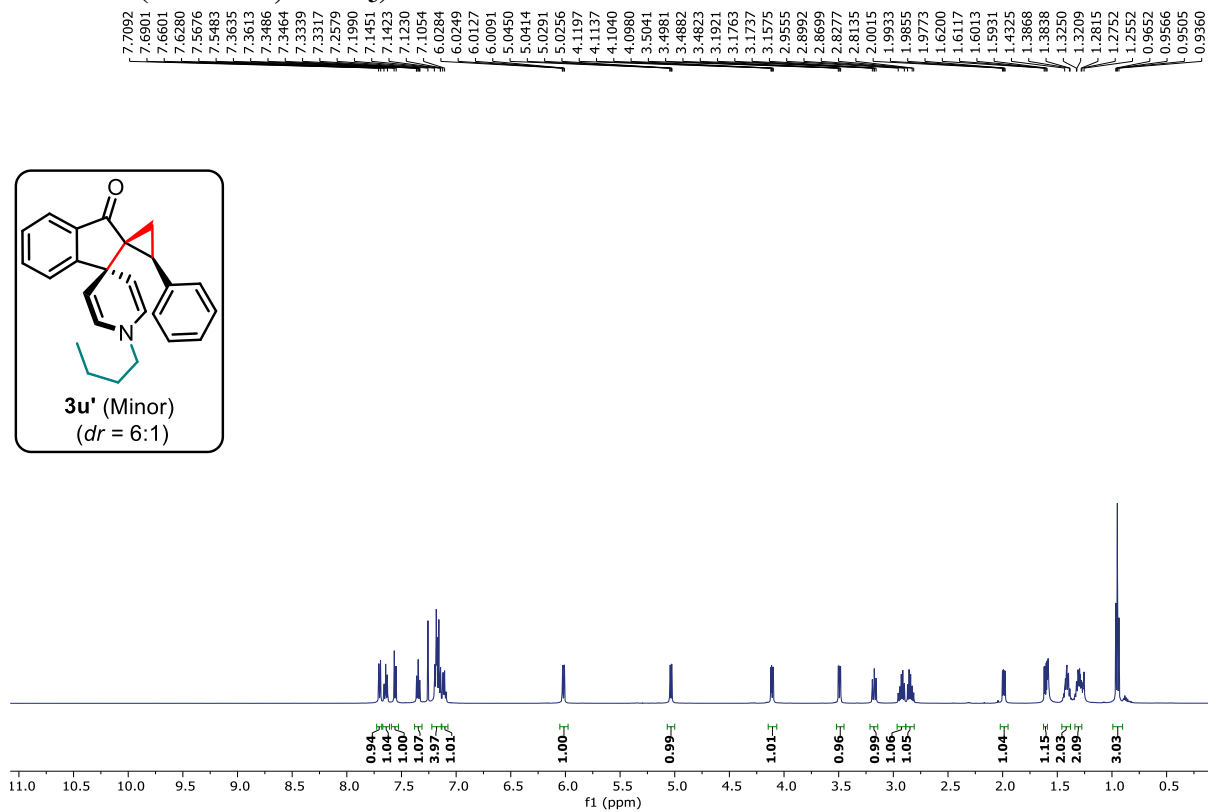



### <sup>13</sup>C NMR (125 MHz, CDCl<sub>3</sub>)

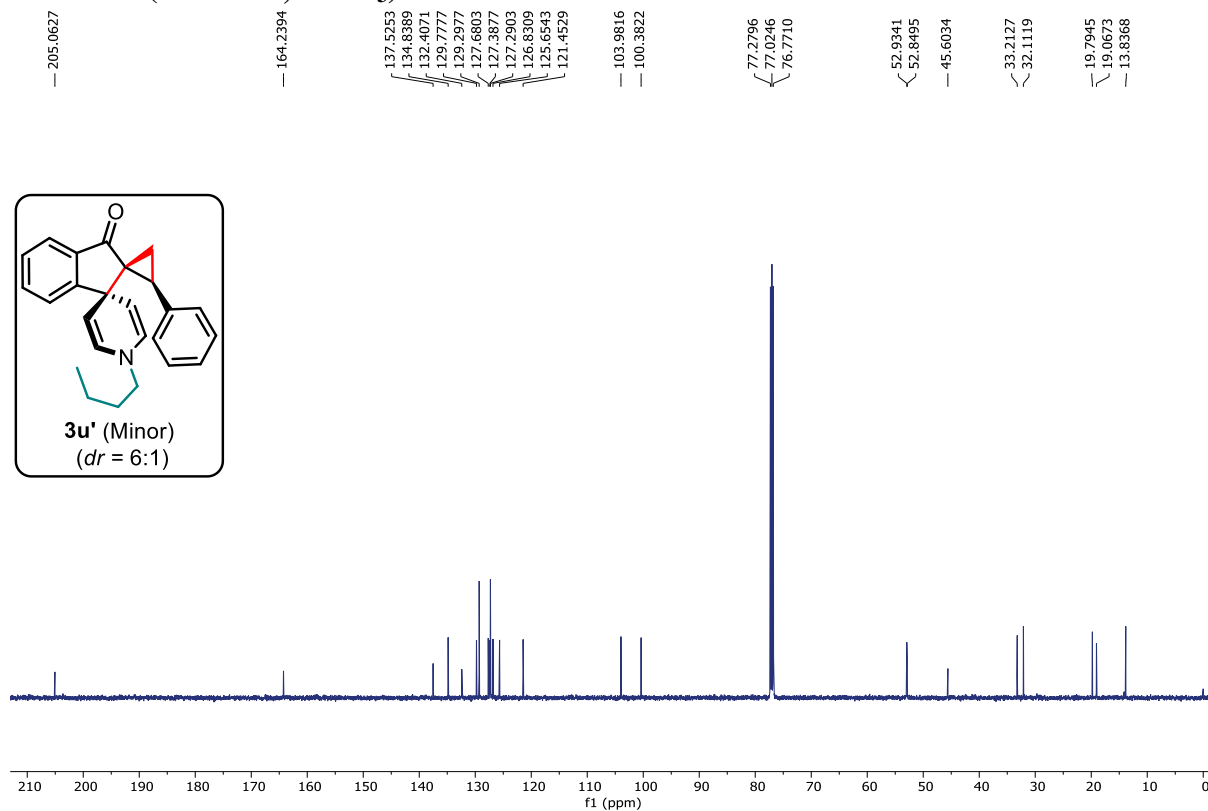

### <sup>1</sup>H NMR (500 MHz, CDCl<sub>3</sub>)

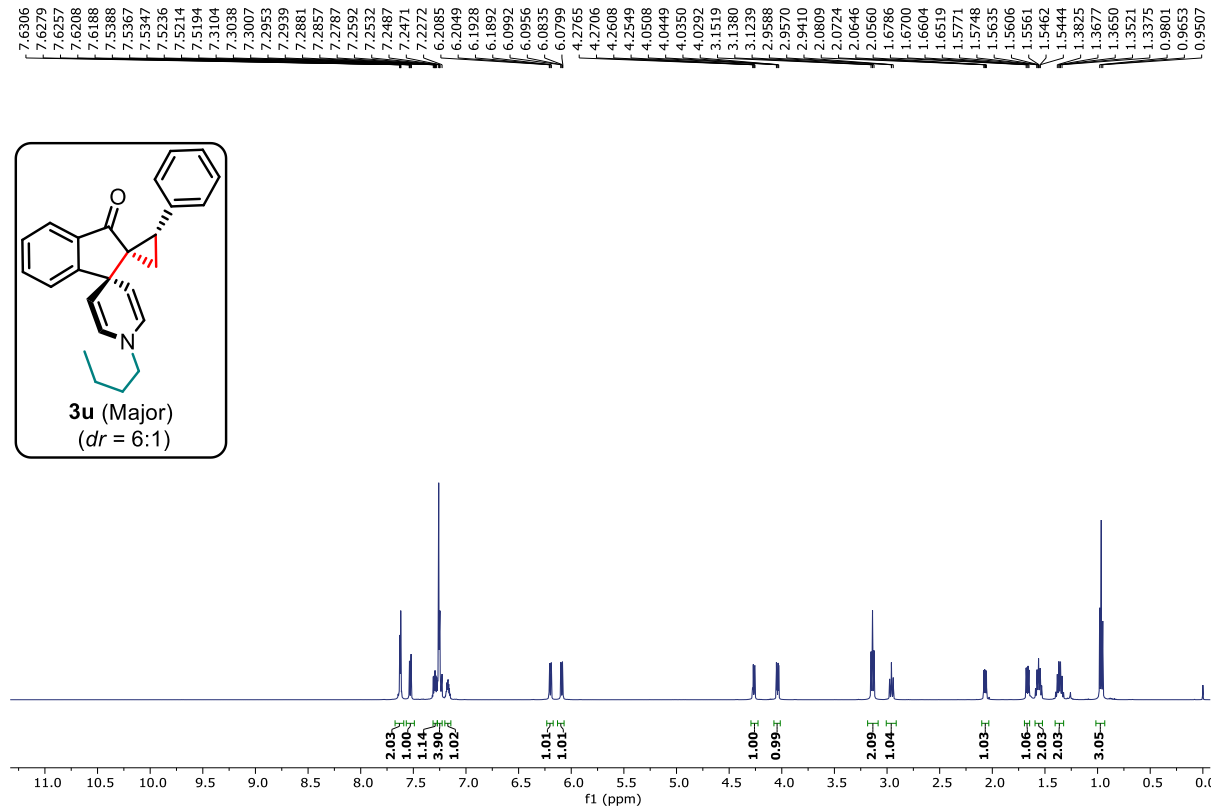

### $^{13}\text{C}$ NMR (125 MHz, $\text{CDCl}_3$ )

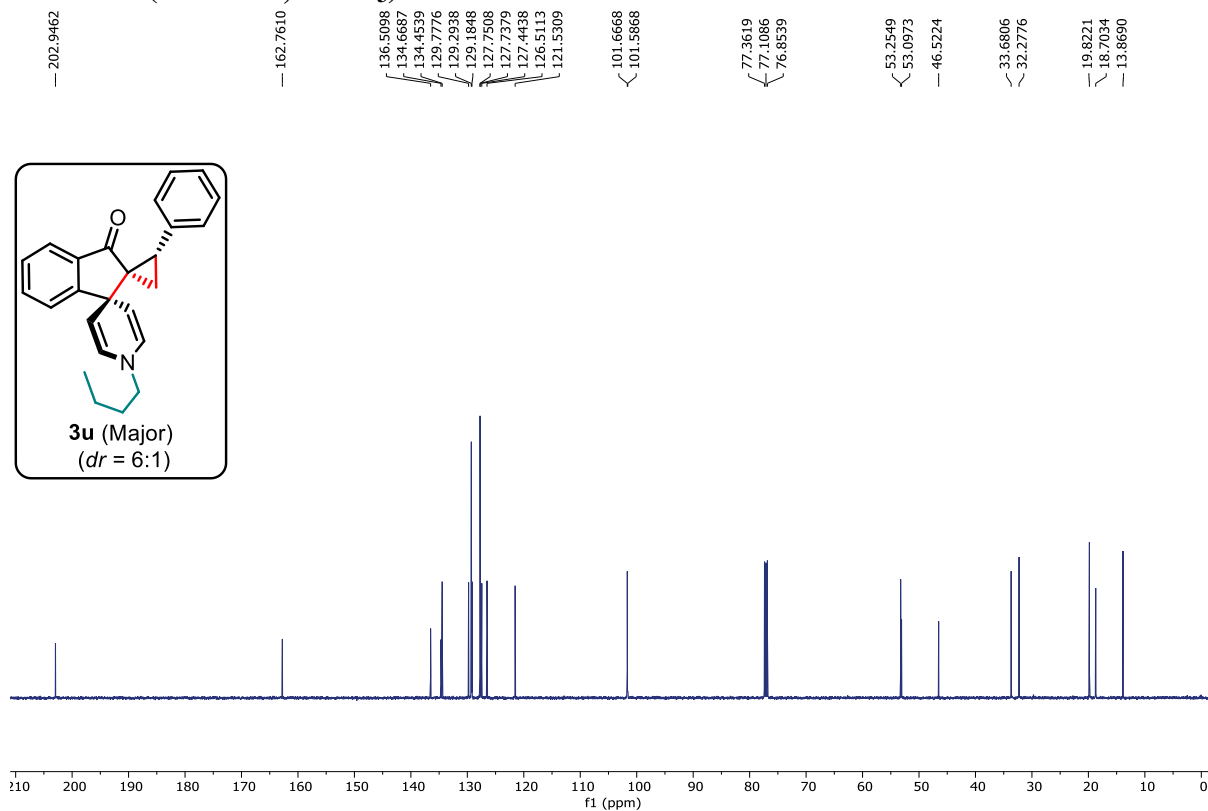

### $^1\text{H}$ NMR (500 MHz, $\text{CDCl}_3$ )

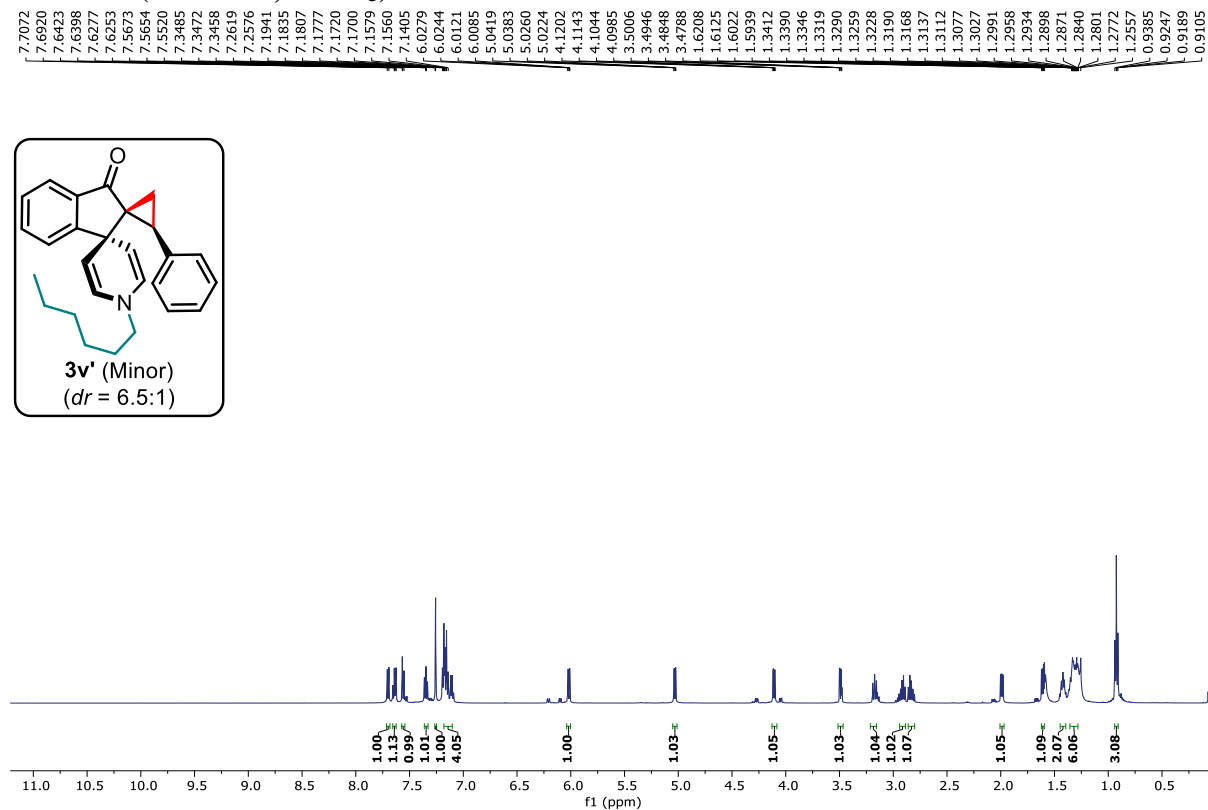

### $^{13}\text{C}$ NMR (125 MHz, $\text{CDCl}_3$ )

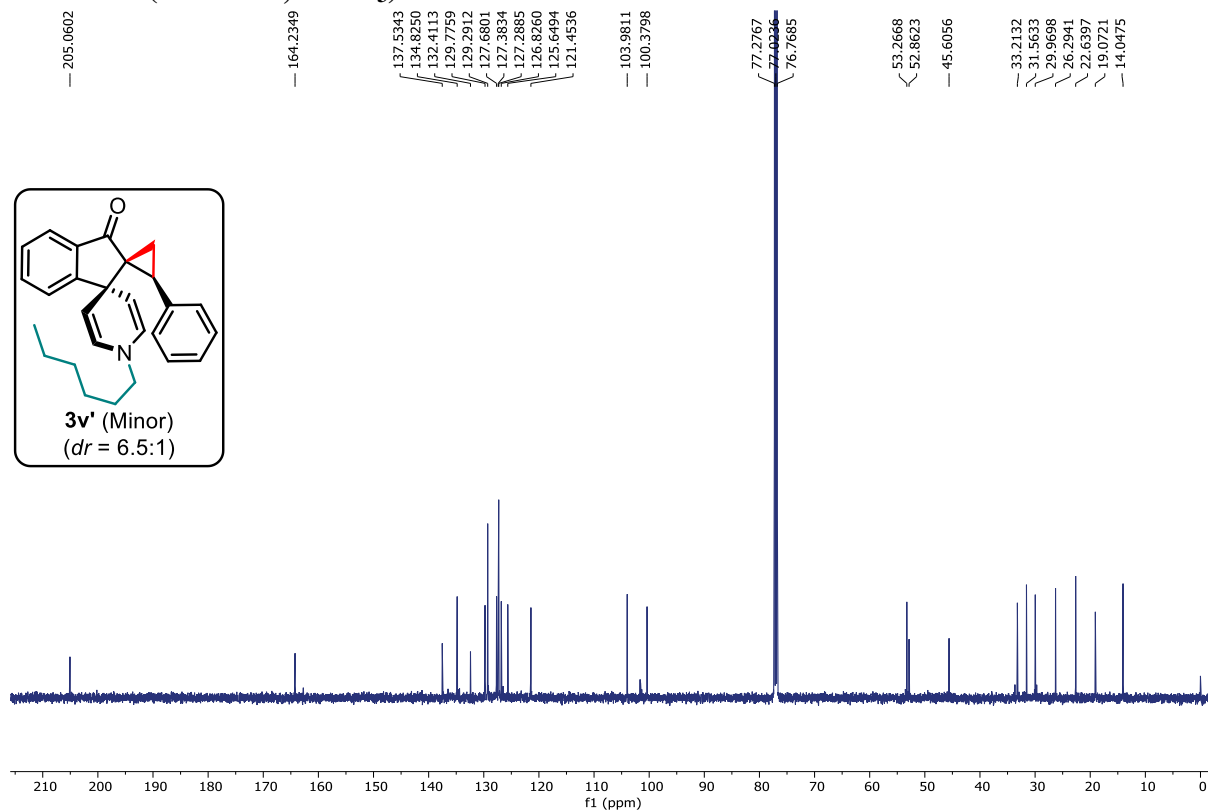

### $^1\text{H}$ NMR (500 MHz, $\text{CDCl}_3$ )

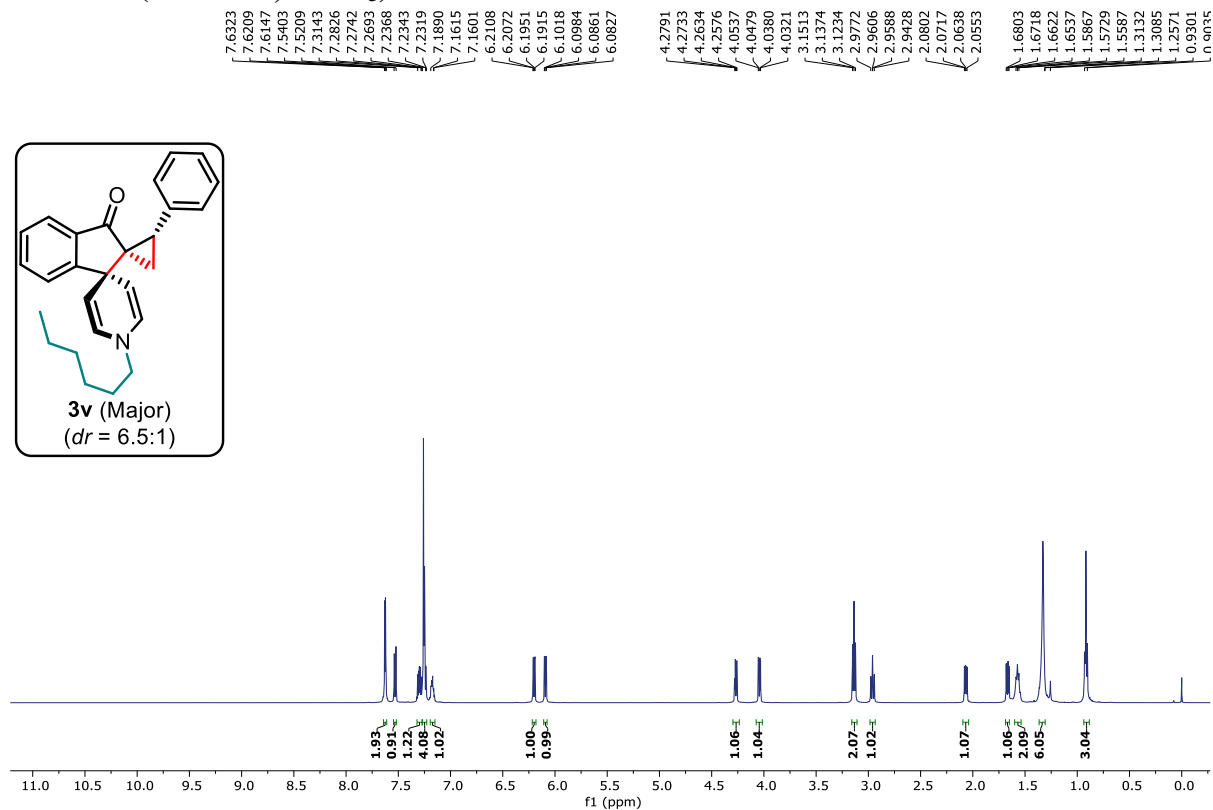

### $^{13}\text{C}$ NMR (125 MHz, $\text{CDCl}_3$ )

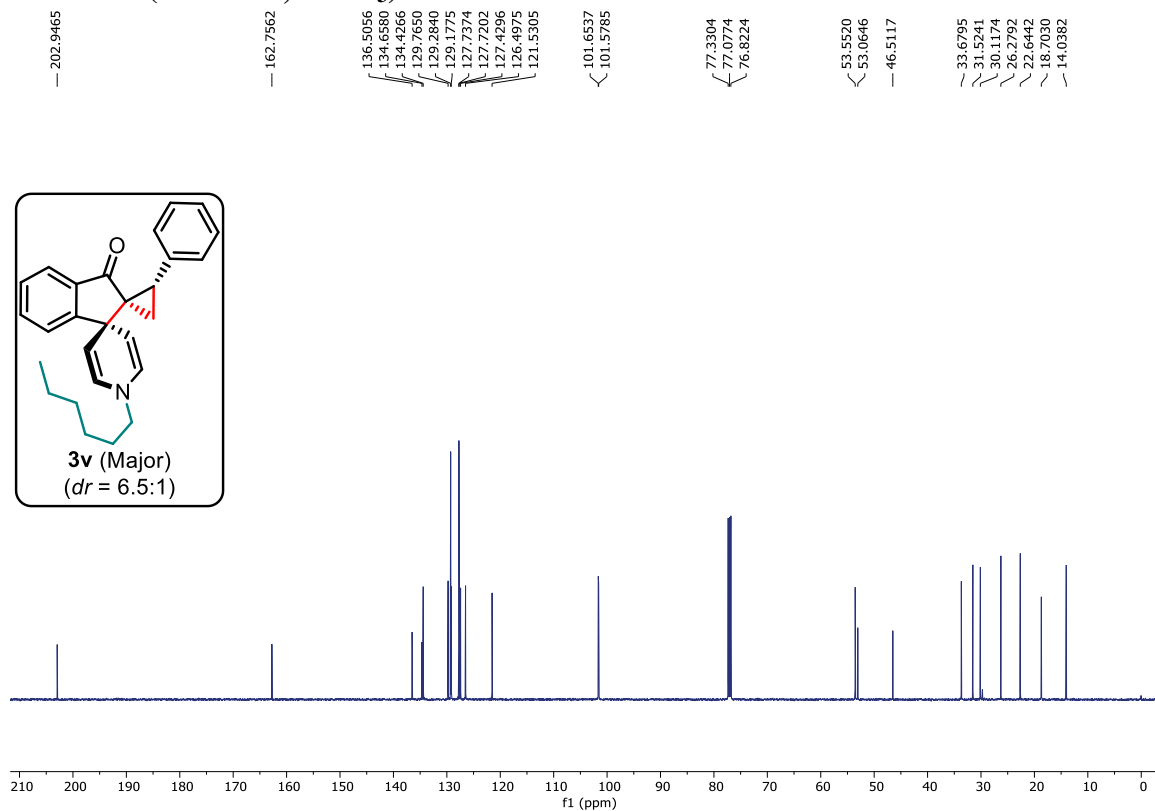

### $^1\text{H}$ NMR (400 MHz, $\text{CDCl}_3$ )

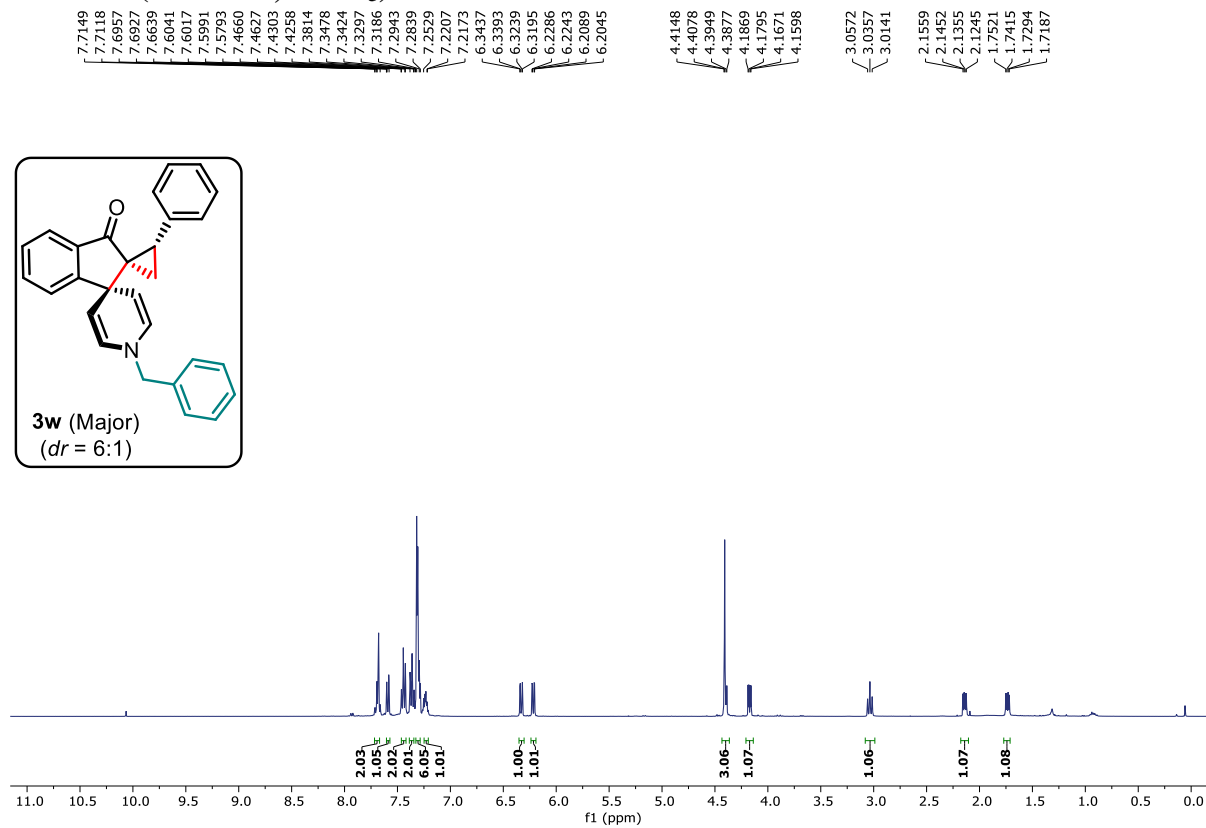

### $^{13}\text{C}$ NMR (100 MHz, $\text{CDCl}_3$ )

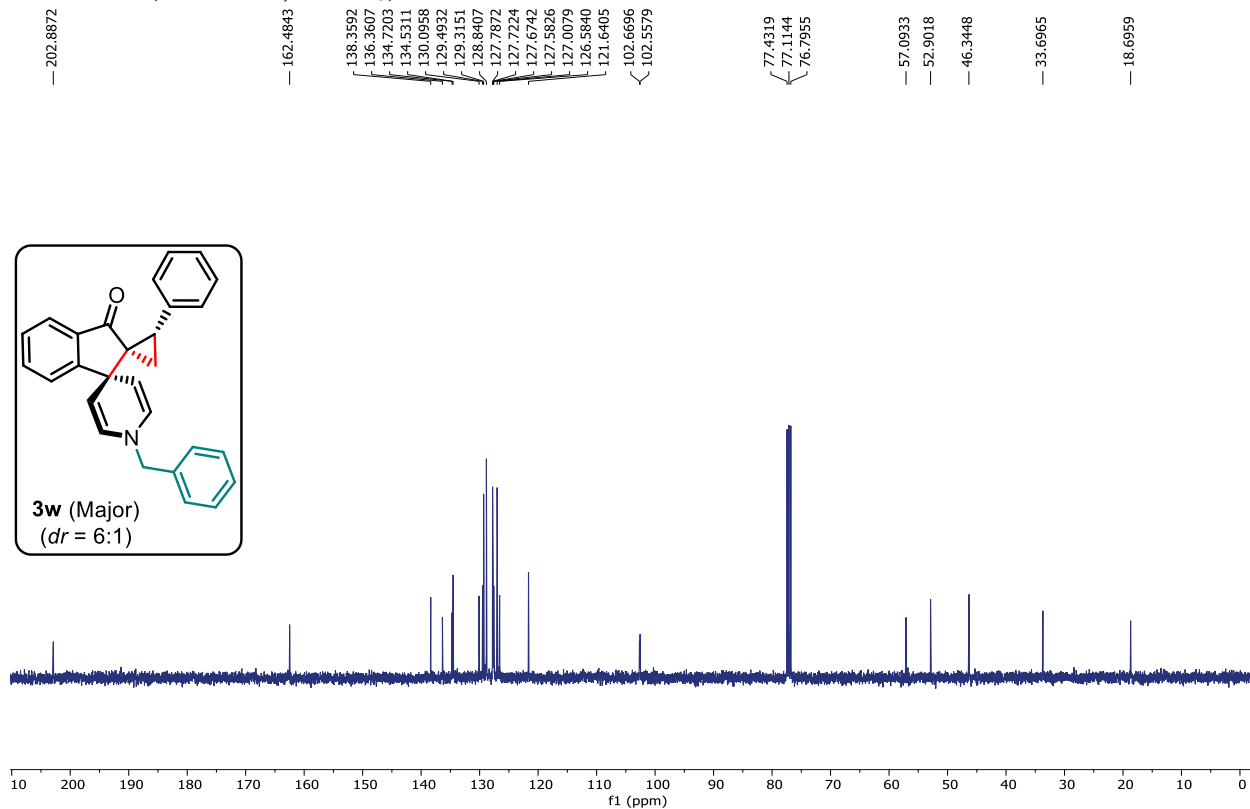

### $^1\text{H}$ NMR (400 MHz, $\text{CDCl}_3$ )

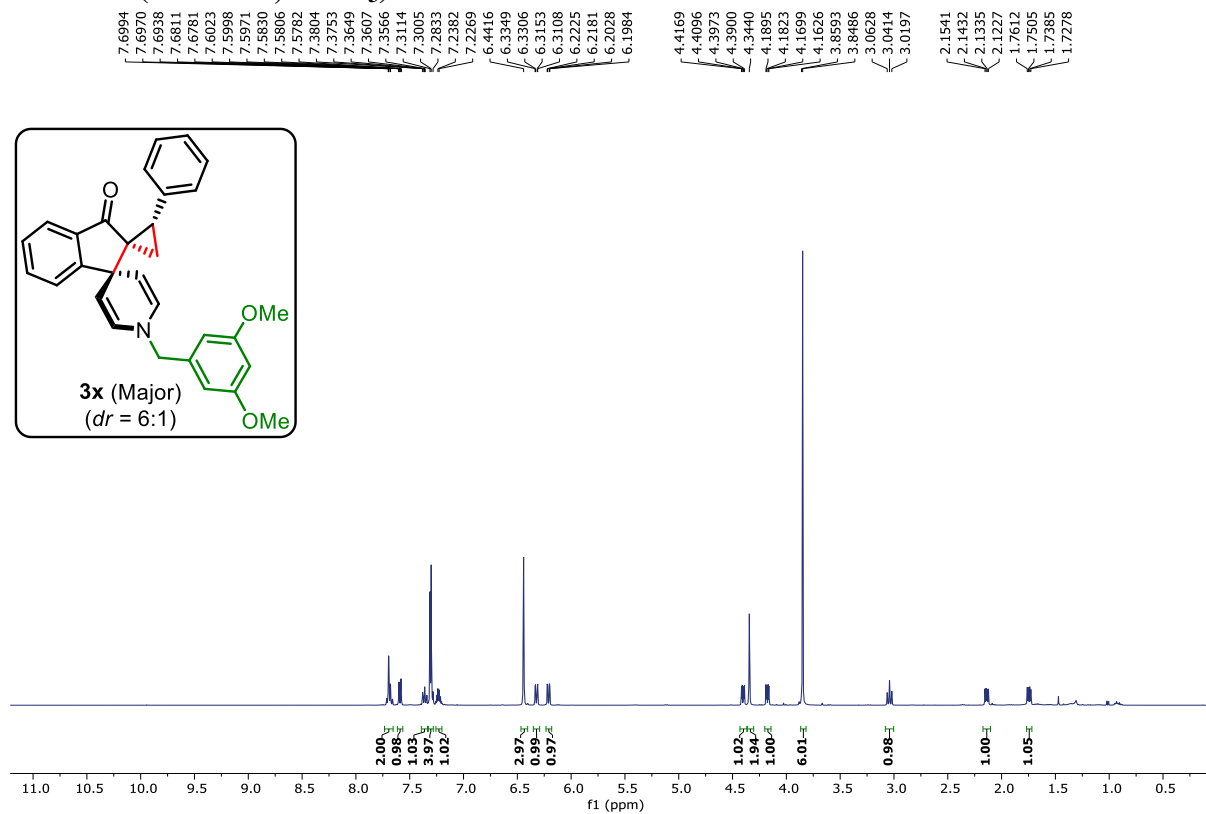

**$^{13}\text{C}$  NMR (100 MHz,  $\text{CDCl}_3$ )**

202.7943, 162.4532, 161.2365, 140.9920, 136.3214, 134.7320, 134.4988, 130.1273, 129.5370, 129.2927, 127.7872, 127.7236, 127.5865, 126.5879, 121.6507, 104.7931, 102.5638, 102.4845, 99.3546, 77.4335, 77.1163, 76.7980, 57.0761, 55.3886, 55.3622, 52.8287, 46.3234, 33.7040, 18.7175

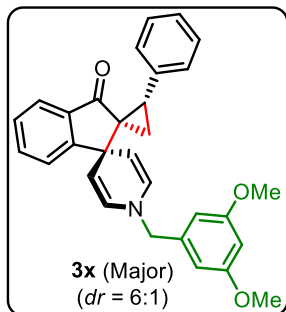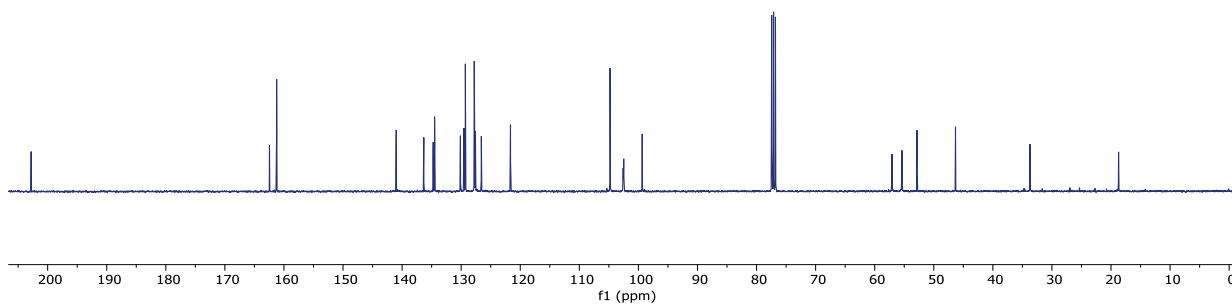

**$^1\text{H}$  NMR (400 MHz,  $\text{CDCl}_3$ )**

7.8548, 7.8535, 7.8323, 7.7662, 7.7493, 7.7443, 7.6925, 7.3925, 7.3918, 7.3911, 7.3904, 7.3897, 7.3890, 7.3883, 7.3876, 7.3869, 7.3862, 7.3855, 7.3848, 7.3841, 7.3834, 7.3827, 7.3820, 7.3813, 7.3806, 7.3799, 7.3792, 7.3785, 7.3778, 7.3771, 7.3764, 7.3757, 7.3750, 7.3743, 7.3736, 7.3729, 7.3722, 7.3715, 7.3708, 7.3701, 7.3694, 7.3687, 7.3680, 7.3673, 7.3666, 7.3659, 7.3652, 7.3645, 7.3638, 7.3631, 7.3624, 7.3617, 7.3610, 7.3603, 7.3596, 7.3589, 7.3582, 7.3575, 7.3568, 7.3561, 7.3554, 7.3547, 7.3540, 7.3533, 7.3526, 7.3519, 7.3512, 7.3505, 7.3498, 7.3491, 7.3484, 7.3477, 7.3470, 7.3463, 7.3456, 7.3449, 7.3442, 7.3435, 7.3428, 7.3421, 7.3414, 7.3407, 7.3400, 7.3393, 7.3386, 7.3379, 7.3372, 7.3365, 7.3358, 7.3351, 7.3344, 7.3337, 7.3330, 7.3323, 7.3316, 7.3309, 7.3302, 7.3295, 7.3288, 7.3281, 7.3274, 7.3267, 7.3260, 7.3253, 7.3246, 7.3239, 7.3232, 7.3225, 7.3218, 7.3211, 7.3204, 7.3197, 7.3190, 7.3183, 7.3176, 7.3169, 7.3162, 7.3155, 7.3148, 7.3141, 7.3134, 7.3127, 7.3120, 7.3113, 7.3106, 7.3099, 7.3092, 7.3085, 7.3078, 7.3071, 7.3064, 7.3057, 7.3050, 7.3043, 7.3036, 7.3029, 7.3022, 7.3015, 7.3008, 7.3001, 7.2994, 7.2987, 7.2980, 7.2973, 7.2966, 7.2959, 7.2952, 7.2945, 7.2938, 7.2931, 7.2924, 7.2917, 7.2910, 7.2903, 7.2896, 7.2889, 7.2882, 7.2875, 7.2868, 7.2861, 7.2854, 7.2847, 7.2840, 7.2833, 7.2826, 7.2819, 7.2812, 7.2805, 7.2798, 7.2791, 7.2784, 7.2777, 7.2770, 7.2763, 7.2756, 7.2749, 7.2742, 7.2735, 7.2728, 7.2721, 7.2714, 7.2707, 7.2700, 7.2693, 7.2686, 7.2679, 7.2672, 7.2665, 7.2658, 7.2651, 7.2644, 7.2637, 7.2630, 7.2623, 7.2616, 7.2609, 7.2602, 7.2595, 7.2588, 7.2581, 7.2574, 7.2567, 7.2560, 7.2553, 7.2546, 7.2539, 7.2532, 7.2525, 7.2518, 7.2511, 7.2504, 7.2497, 7.2490, 7.2483, 7.2476, 7.2469, 7.2462, 7.2455, 7.2448, 7.2441, 7.2434, 7.2427, 7.2420, 7.2413, 7.2406, 7.2399, 7.2392, 7.2385, 7.2378, 7.2371, 7.2364, 7.2357, 7.2350, 7.2343, 7.2336, 7.2329, 7.2322, 7.2315, 7.2308, 7.2301, 7.2294, 7.2287, 7.2280, 7.2273, 7.2266, 7.2259, 7.2252, 7.2245, 7.2238, 7.2231, 7.2224, 7.2217, 7.2210, 7.2203, 7.2196, 7.2189, 7.2182, 7.2175, 7.2168, 7.2161, 7.2154, 7.2147, 7.2140, 7.2133, 7.2126, 7.2119, 7.2112, 7.2105, 7.2098, 7.2091, 7.2084, 7.2077, 7.2070, 7.2063, 7.2056, 7.2049, 7.2042, 7.2035, 7.2028, 7.2021, 7.2014, 7.2007, 7.2000, 7.1993, 7.1986, 7.1979, 7.1972, 7.1965, 7.1958, 7.1951, 7.1944, 7.1937, 7.1930, 7.1923, 7.1916, 7.1909, 7.1902, 7.1895, 7.1888, 7.1881, 7.1874, 7.1867, 7.1860, 7.1853, 7.1846, 7.1839, 7.1832, 7.1825, 7.1818, 7.1811, 7.1804, 7.1797, 7.1790, 7.1783, 7.1776, 7.1769, 7.1762, 7.1755, 7.1748, 7.1741, 7.1734, 7.1727, 7.1720, 7.1713, 7.1706, 7.1699, 7.1692, 7.1685, 7.1678, 7.1671, 7.1664, 7.1657, 7.1650, 7.1643, 7.1636, 7.1629, 7.1622, 7.1615, 7.1608, 7.1601, 7.1594, 7.1587, 7.1580, 7.1573, 7.1566, 7.1559, 7.1552, 7.1545, 7.1538, 7.1531, 7.1524, 7.1517, 7.1510, 7.1503, 7.1496, 7.1489, 7.1482, 7.1475, 7.1468, 7.1461, 7.1454, 7.1447, 7.1440, 7.1433, 7.1426, 7.1419, 7.1412, 7.1405, 7.1398, 7.1391, 7.1384, 7.1377, 7.1370, 7.1363, 7.1356, 7.1349, 7.1342, 7.1335, 7.1328, 7.1321, 7.1314, 7.1307, 7.1300, 7.1293, 7.1286, 7.1279, 7.1272, 7.1265, 7.1258, 7.1251, 7.1244, 7.1237, 7.1230, 7.1223, 7.1216, 7.1209, 7.1202, 7.1195, 7.1188, 7.1181, 7.1174, 7.1167, 7.1160, 7.1153, 7.1146, 7.1139, 7.1132, 7.1125, 7.1118, 7.1111, 7.1104, 7.1097, 7.1090, 7.1083, 7.1076, 7.1069, 7.1062, 7.1055, 7.1048, 7.1041, 7.1034, 7.1027, 7.1020, 7.1013, 7.1006, 7.1000, 7.0994, 7.0988, 7.0982, 7.0976, 7.0970, 7.0964, 7.0958, 7.0952, 7.0946, 7.0940, 7.0934, 7.0928, 7.0922, 7.0916, 7.0910, 7.0904, 7.0898, 7.0892, 7.0886, 7.0880, 7.0874, 7.0868, 7.0862, 7.0856, 7.0850, 7.0844, 7.0838, 7.0832, 7.0826, 7.0820, 7.0814, 7.0808, 7.0802, 7.0796, 7.0790, 7.0784, 7.0778, 7.0772, 7.0766, 7.0760, 7.0754, 7.0748, 7.0742, 7.0736, 7.0730, 7.0724, 7.0718, 7.0712, 7.0706, 7.0700, 7.0694, 7.0688, 7.0682, 7.0676, 7.0670, 7.0664, 7.0658, 7.0652, 7.0646, 7.0640, 7.0634, 7.0628, 7.0622, 7.0616, 7.0610, 7.0604, 7.0598, 7.0592, 7.0586, 7.0580, 7.0574, 7.0568, 7.0562, 7.0556, 7.0550, 7.0544, 7.0538, 7.0532, 7.0526, 7.0520, 7.0514, 7.0508, 7.0502, 7.0496, 7.0490, 7.0484, 7.0478, 7.0472, 7.0466, 7.0460, 7.0454, 7.0448, 7.0442, 7.0436, 7.0430, 7.0424, 7.0418, 7.0412, 7.0406, 7.0400, 7.0394, 7.0388, 7.0382, 7.0376, 7.0370, 7.0364, 7.0358, 7.0352, 7.0346, 7.0340, 7.0334, 7.0328, 7.0322, 7.0316, 7.0310, 7.0304, 7.0298, 7.0292, 7.0286, 7.0280, 7.0274, 7.0268, 7.0262, 7.0256, 7.0250, 7.0244, 7.0238, 7.0232, 7.0226, 7.0220, 7.0214, 7.0208, 7.0202, 7.0196, 7.0190, 7.0184, 7.0178, 7.0172, 7.0166, 7.0160, 7.0154, 7.0148, 7.0142, 7.0136, 7.0130, 7.0124, 7.0118, 7.0112, 7.0106, 7.0100, 7.0094, 7.0088, 7.0082, 7.0076, 7.0070, 7.0064, 7.0058, 7.0052, 7.0046, 7.0040, 7.0034, 7.0028, 7.0022, 7.0016, 7.0010, 7.0004, 7.0000

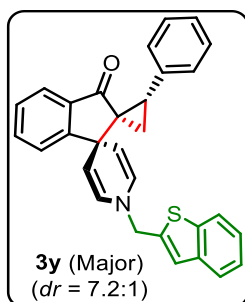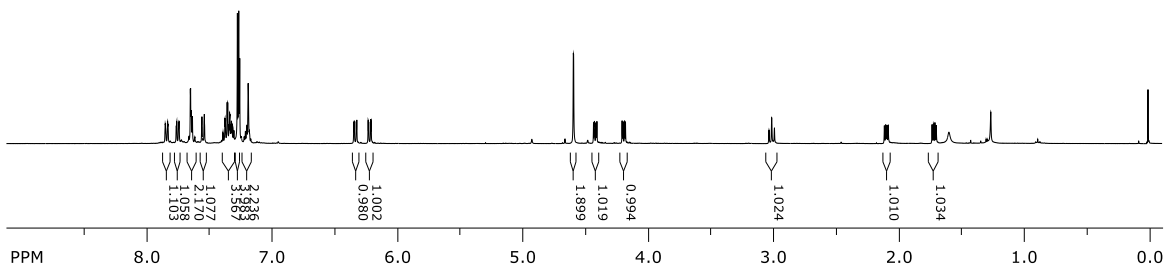

### <sup>13</sup>C NMR (100 MHz, CDCl<sub>3</sub>)

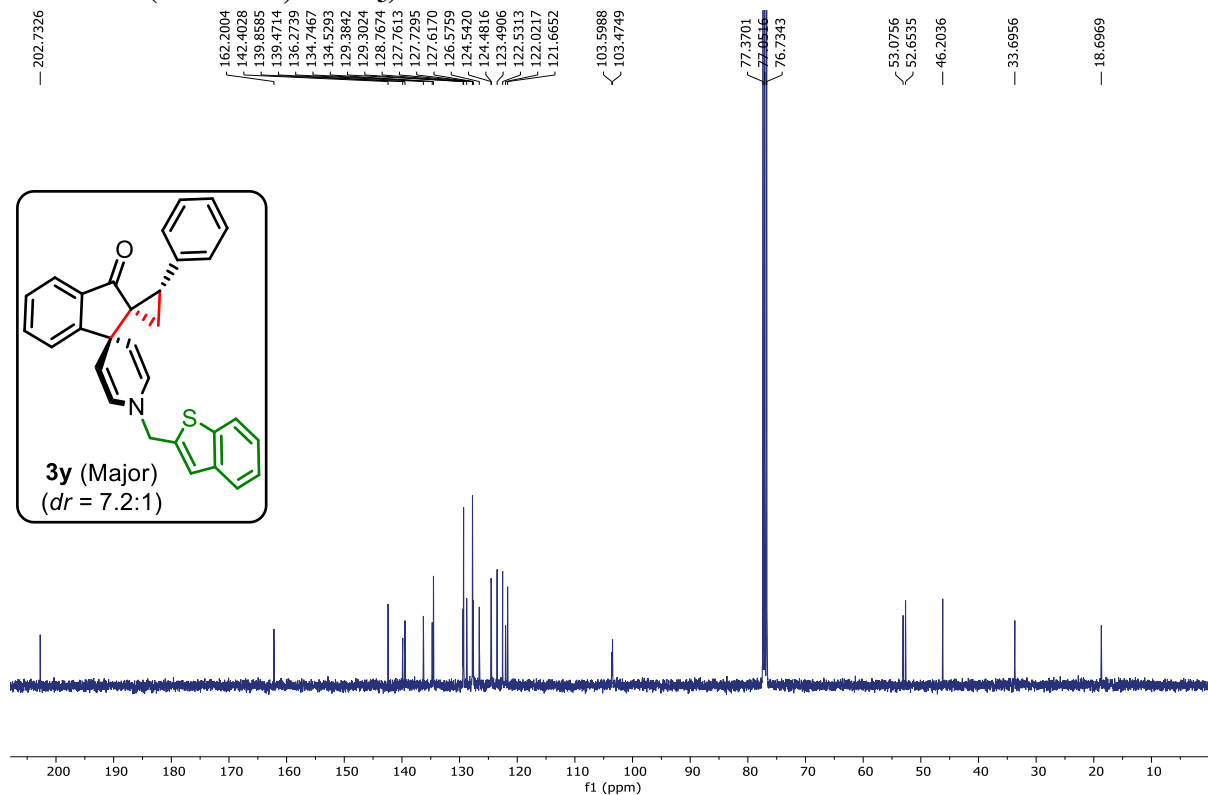

### <sup>1</sup>H NMR (400 MHz, CDCl<sub>3</sub>)

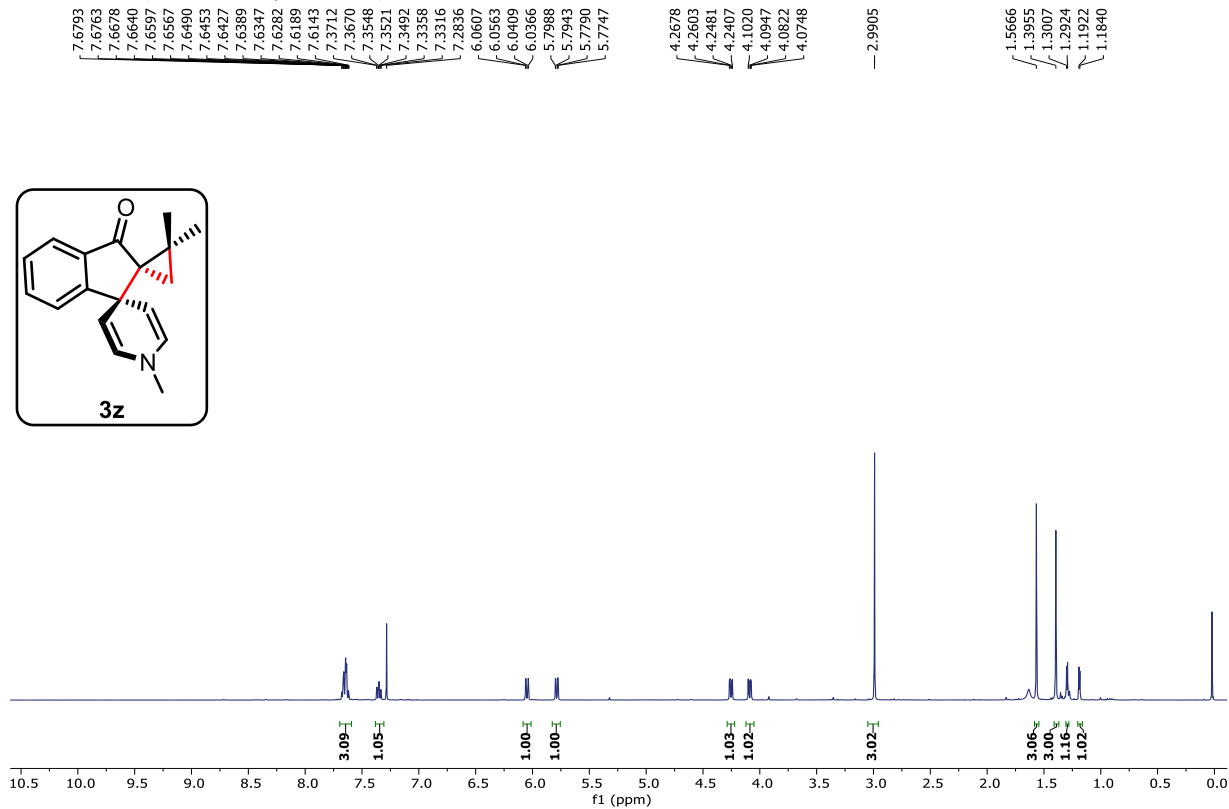

### <sup>13</sup>C NMR (100 MHz, CDCl<sub>3</sub>)

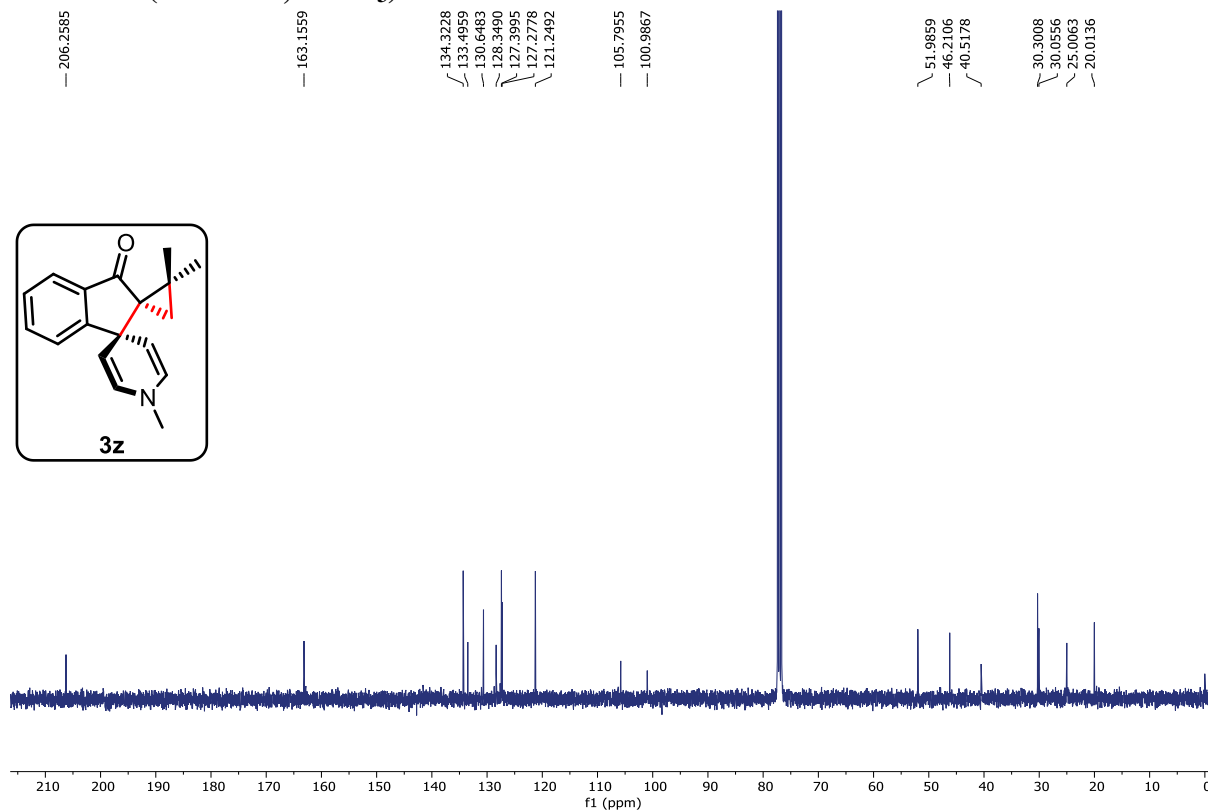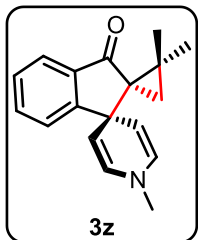

### <sup>1</sup>H NMR (400 MHz, CDCl<sub>3</sub>)

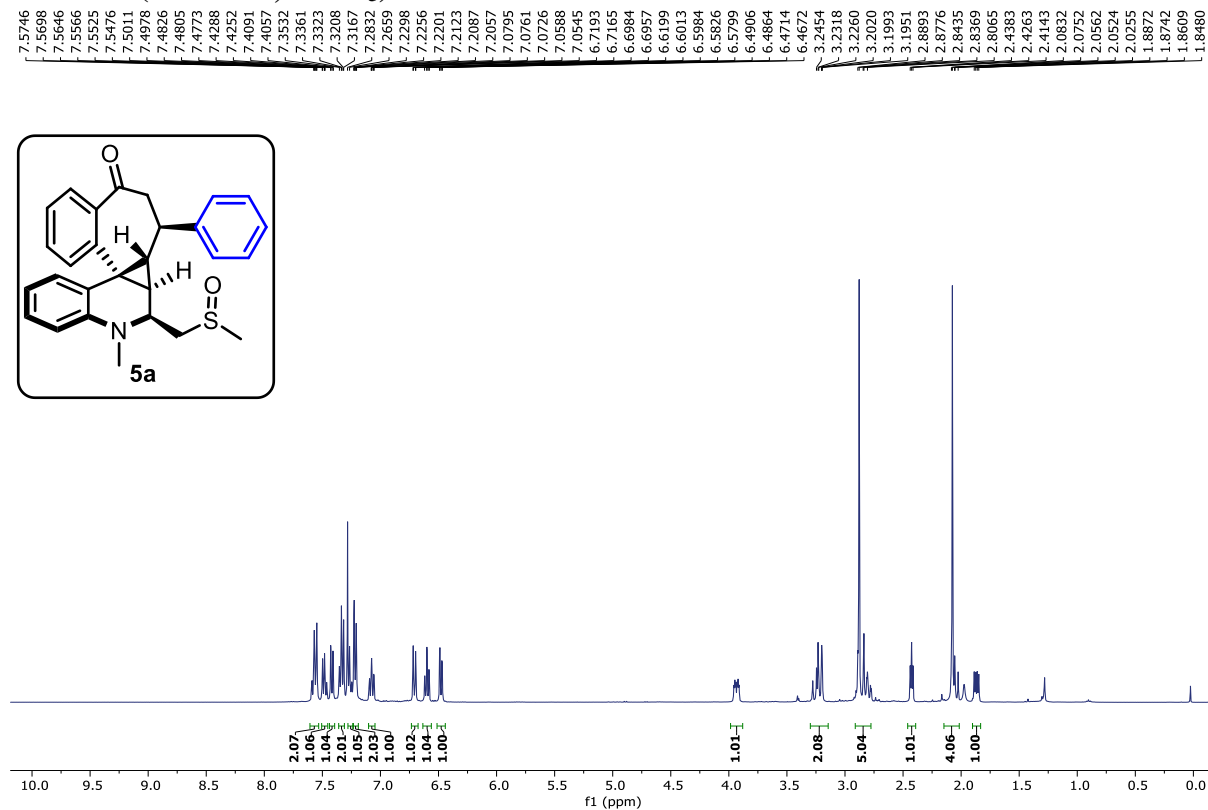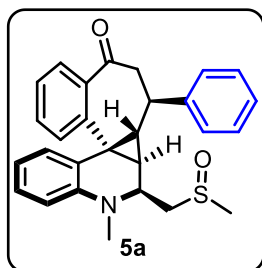



### $^{13}\text{C}$ NMR (100 MHz, $\text{CDCl}_3$ )

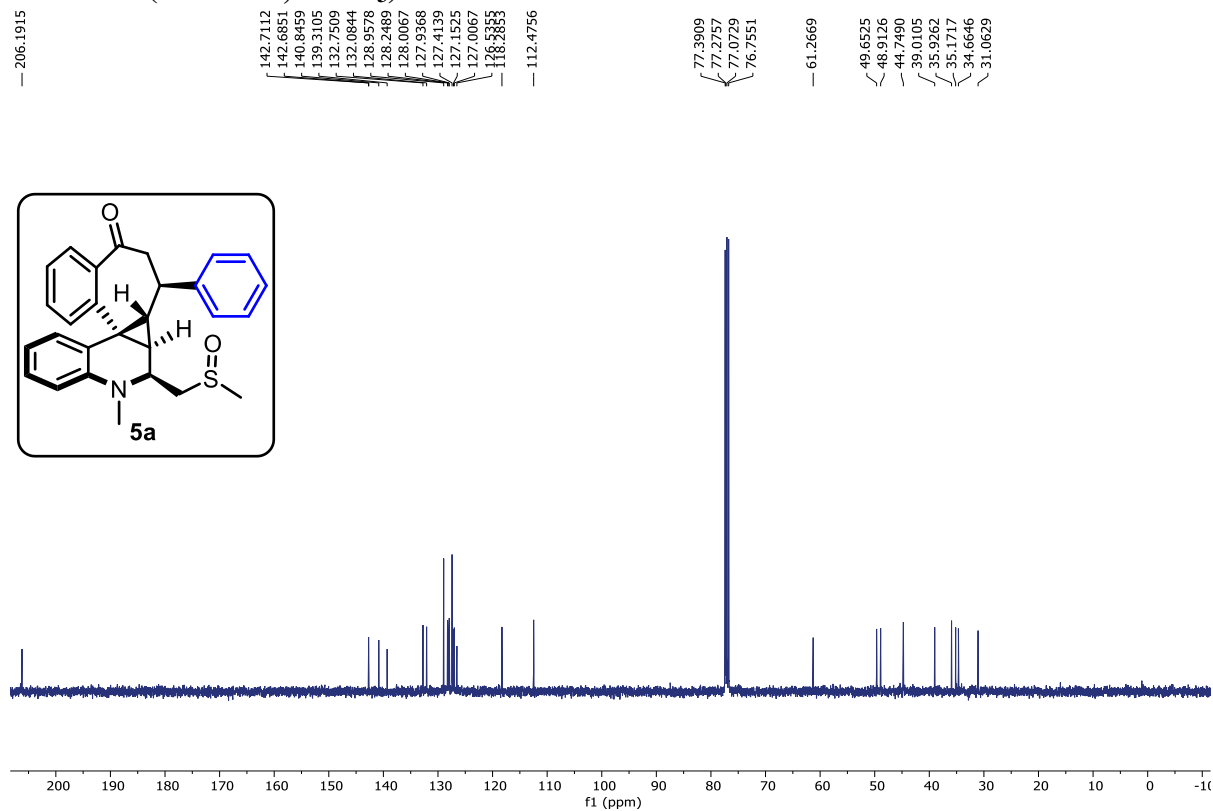

### $^1\text{H}$ NMR (400 MHz, $\text{CDCl}_3$ )

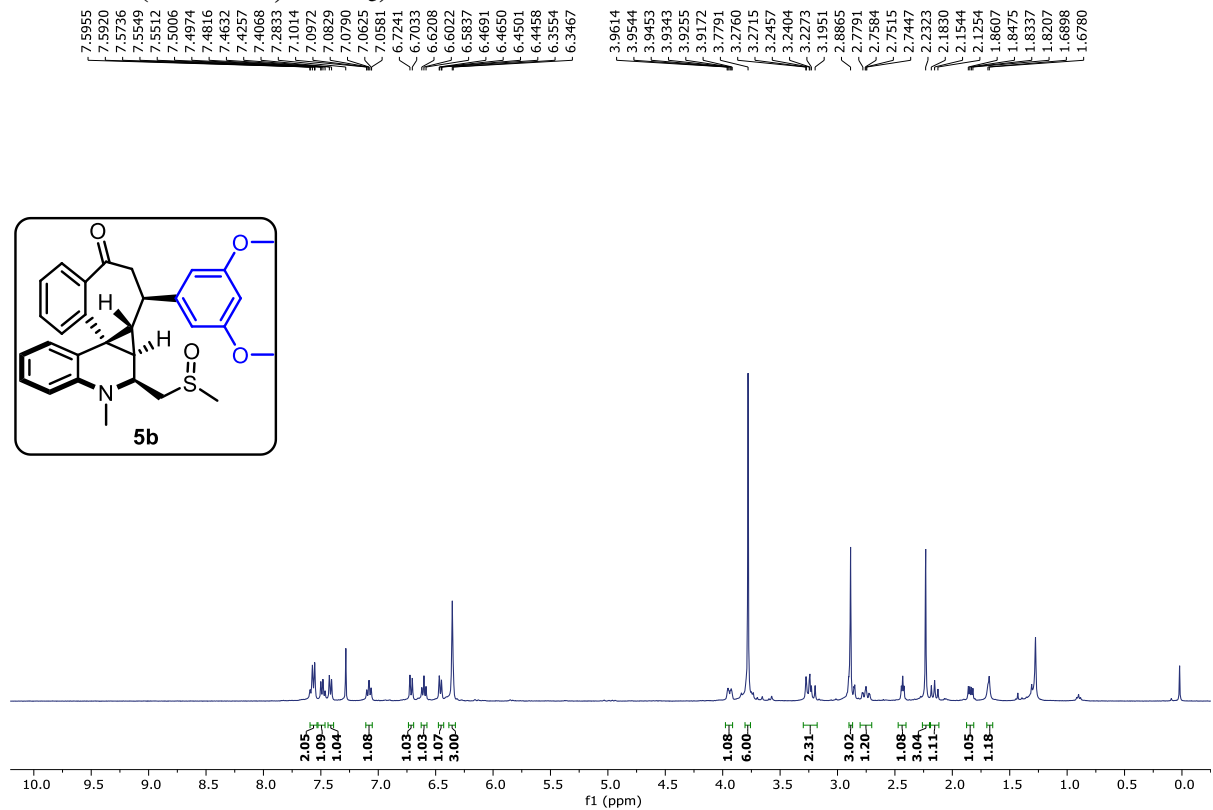

### <sup>13</sup>C NMR (100 MHz, CDCl<sub>3</sub>)

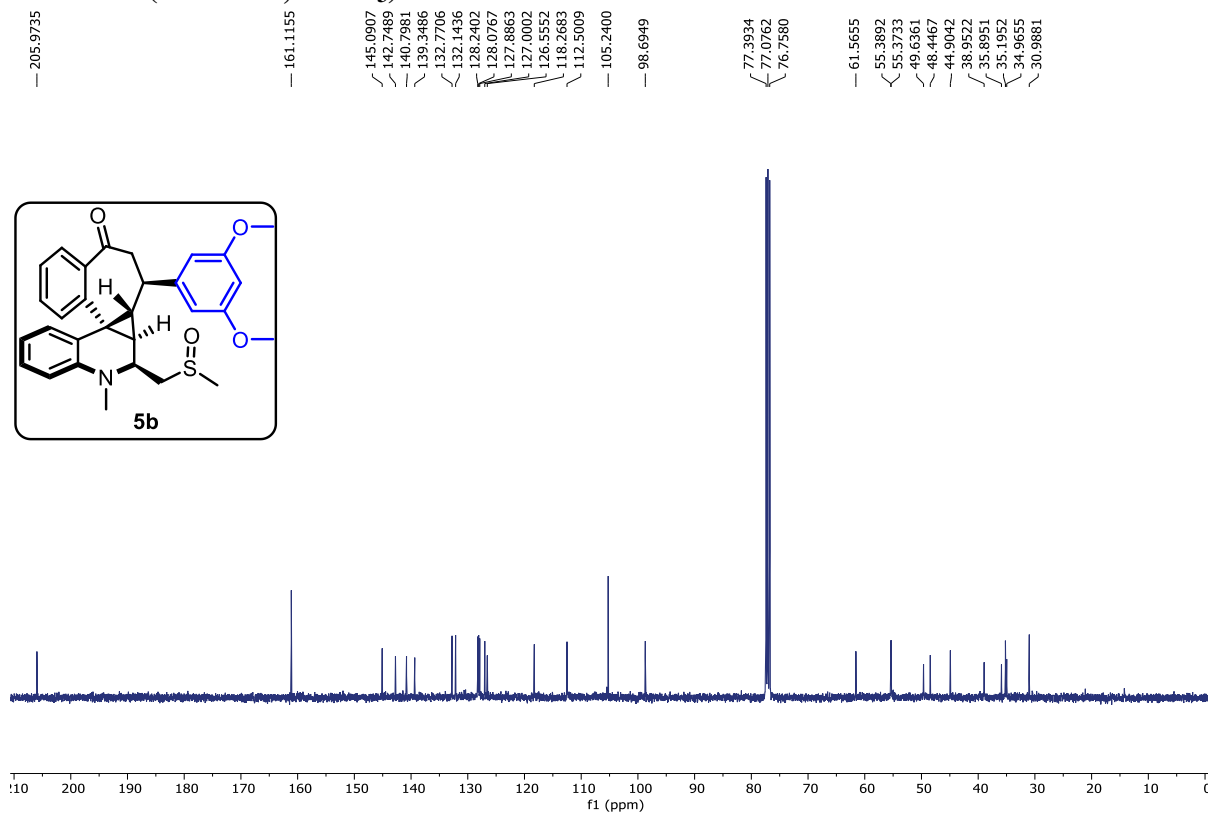

### <sup>1</sup>H NMR (400 MHz, CDCl<sub>3</sub>)

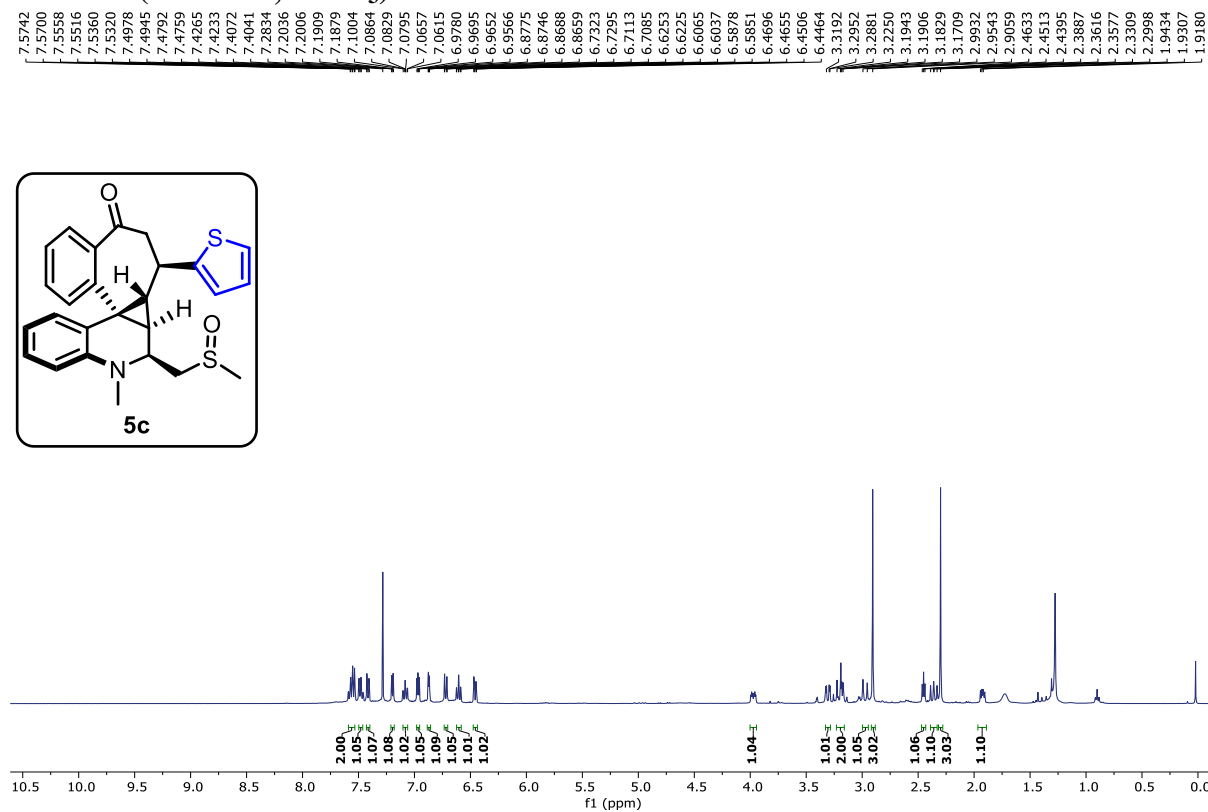

### <sup>13</sup>C NMR (100 MHz, CDCl<sub>3</sub>)

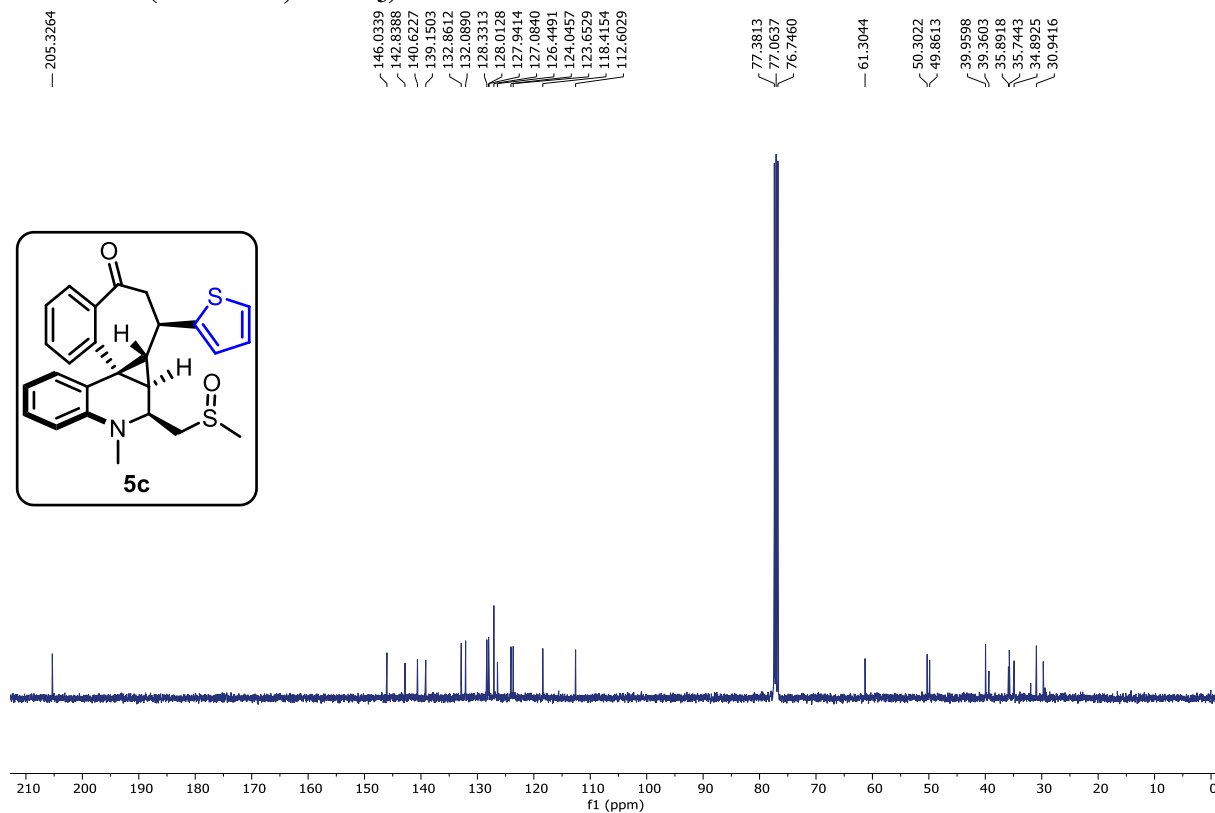

### <sup>1</sup>H NMR (500 MHz, CDCl<sub>3</sub>)

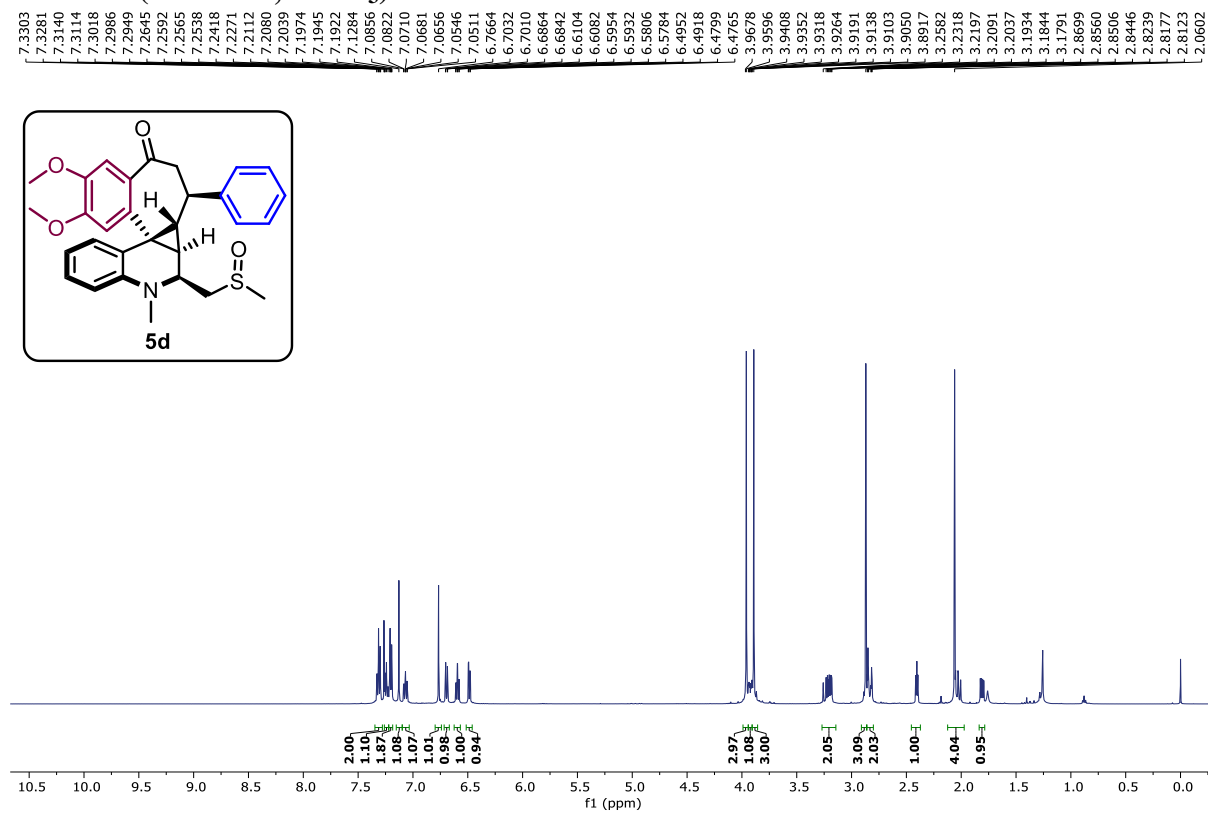

### $^{13}\text{C}$ NMR (125 MHz, $\text{CDCl}_3$ )

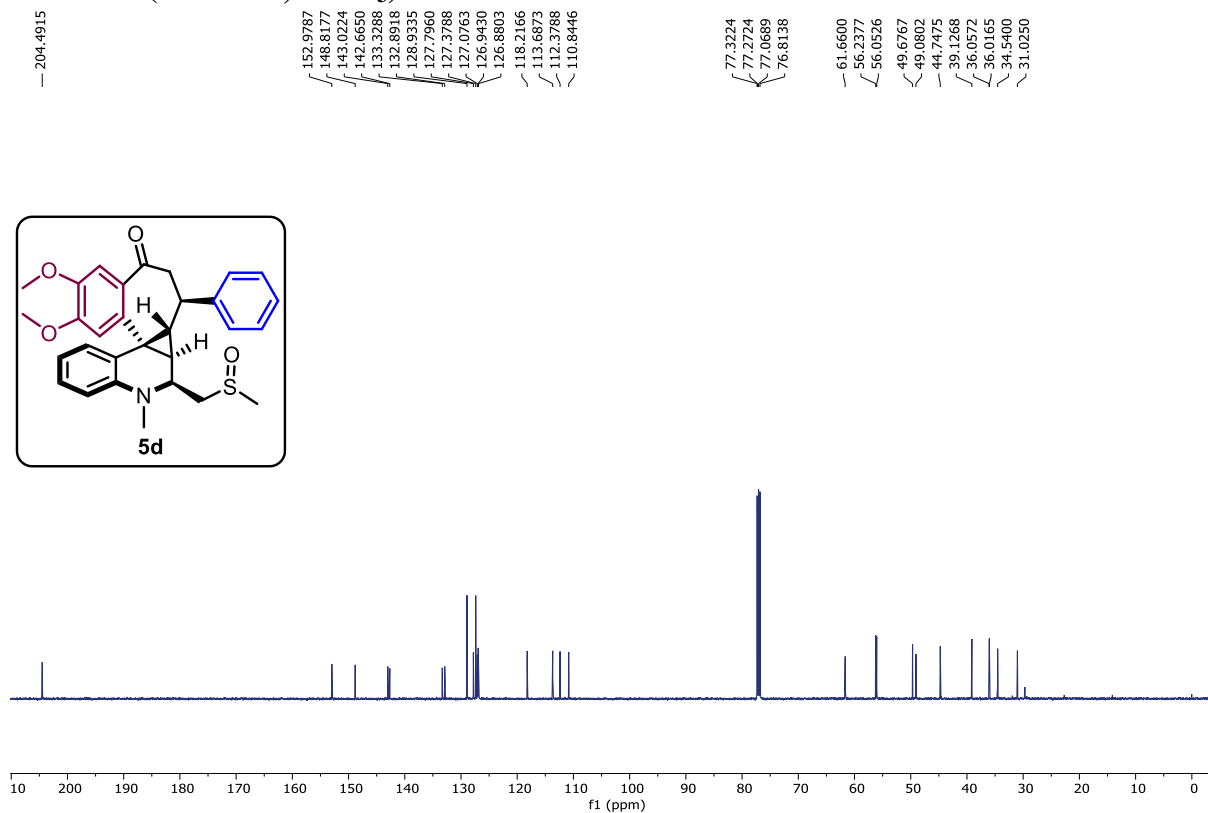

### $^1\text{H}$ NMR (400 MHz, $\text{CDCl}_3$ )

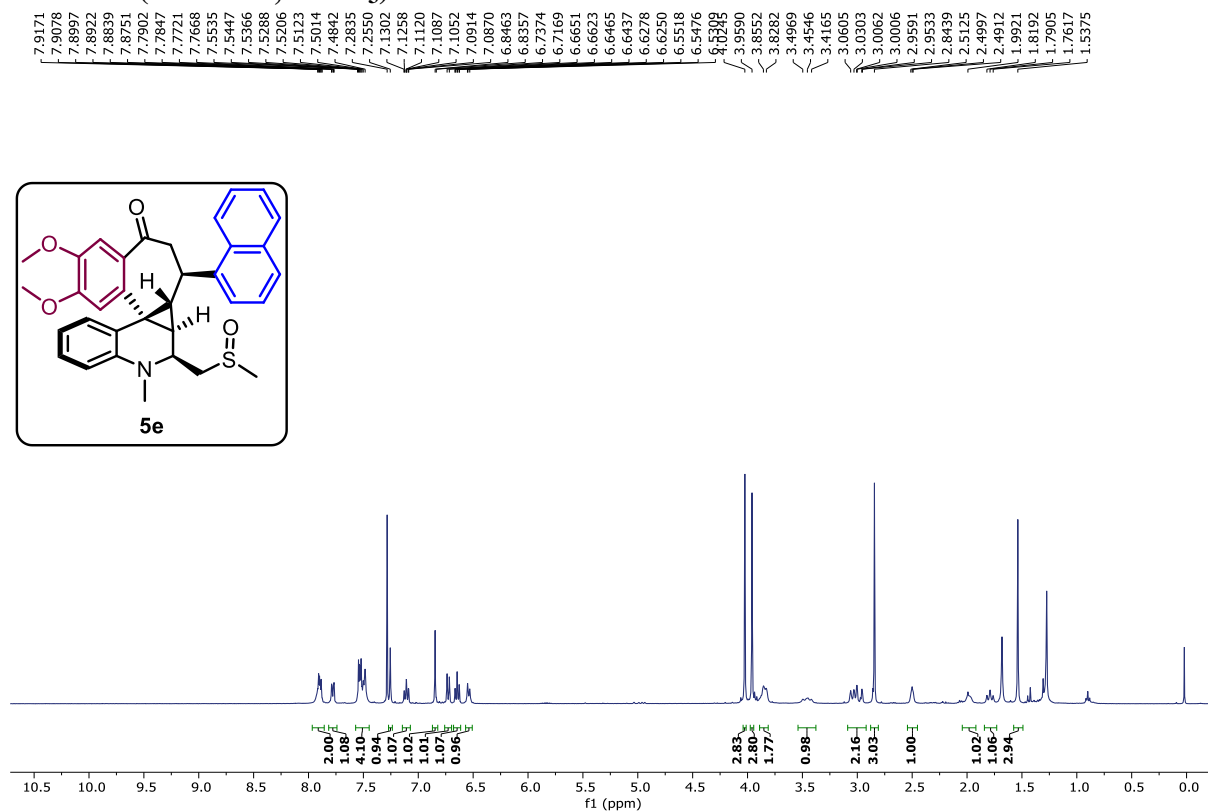

### $^{13}\text{C}$ NMR (125 MHz, $\text{CDCl}_3$ )

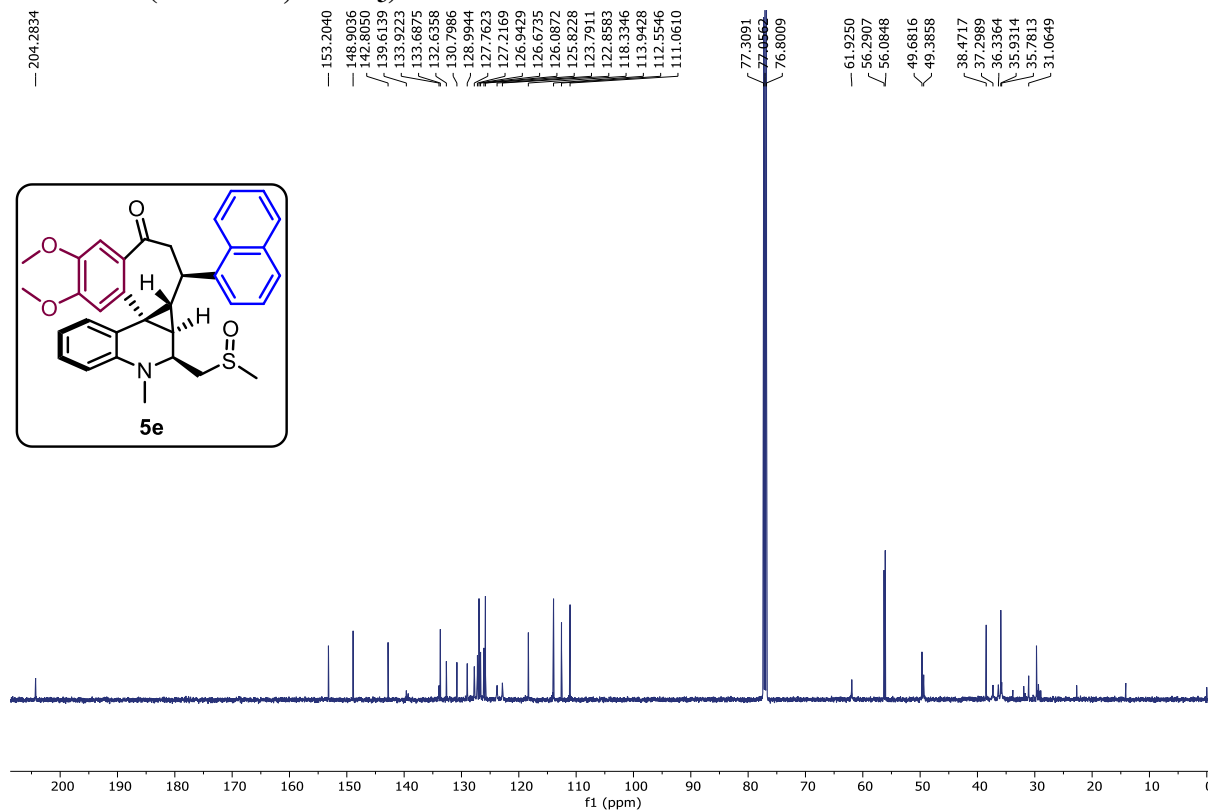

### $^1\text{H}$ NMR (500 MHz, $\text{CDCl}_3$ )

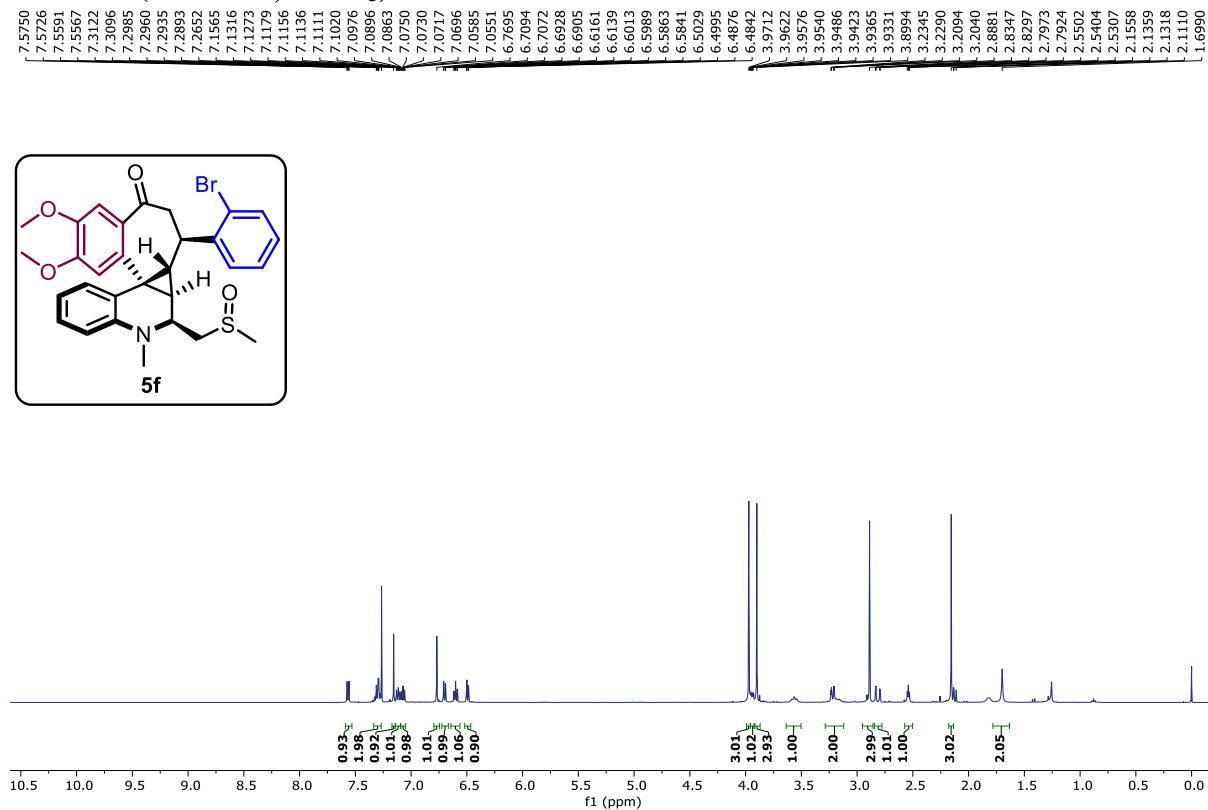

### <sup>13</sup>C NMR (125 MHz, CDCl<sub>3</sub>)

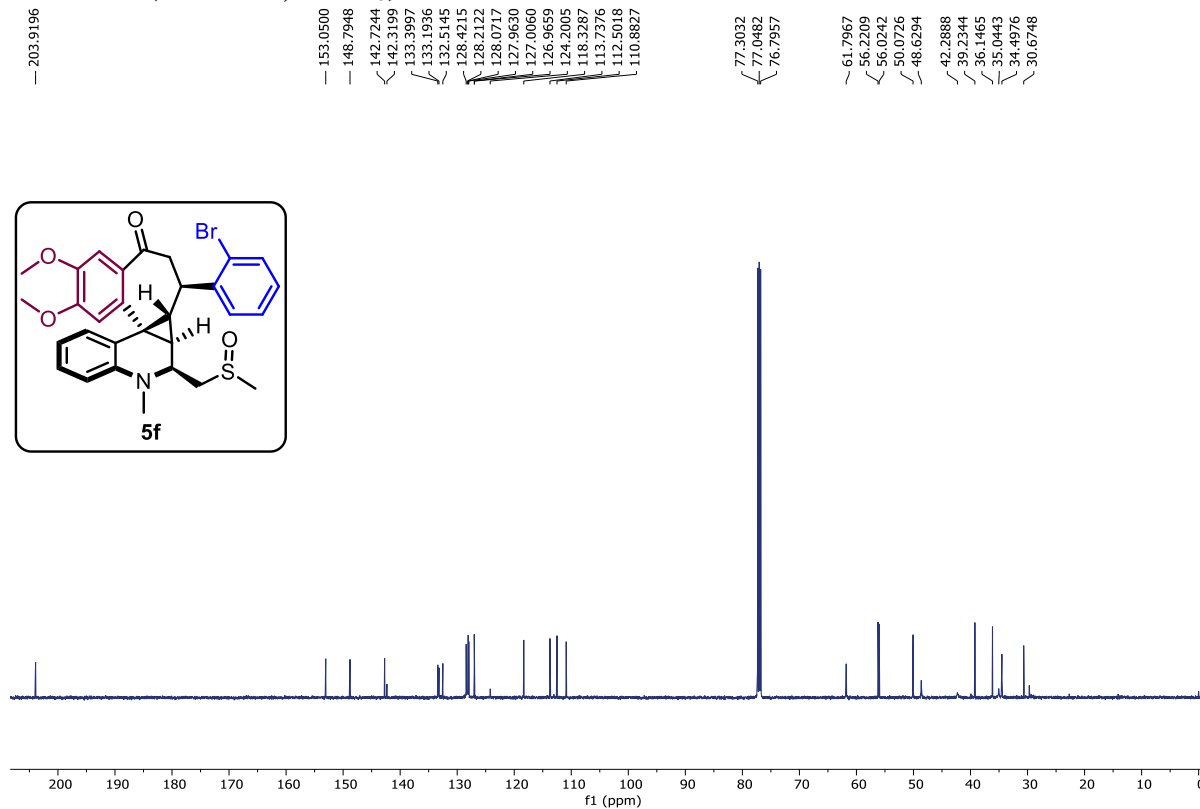

### <sup>1</sup>H NMR (500 MHz, CDCl<sub>3</sub>)

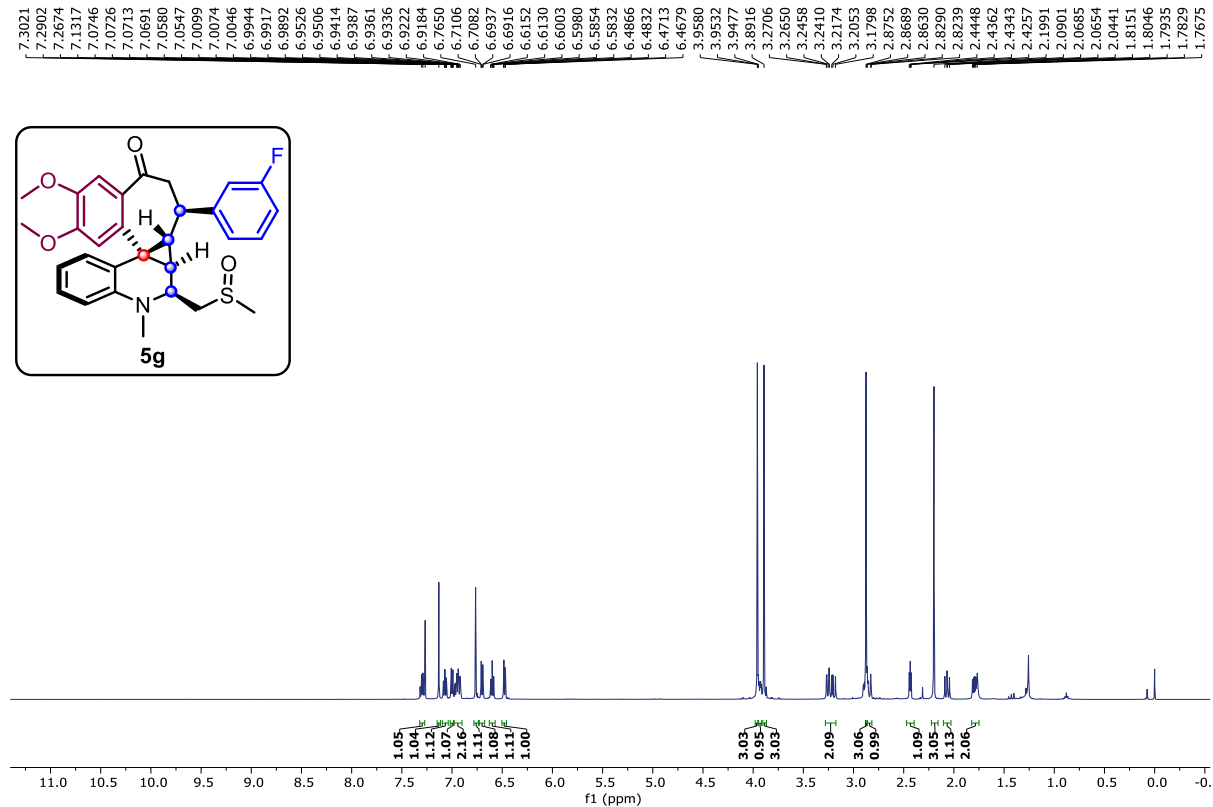

### <sup>13</sup>C NMR (125 MHz, CDCl<sub>3</sub>)

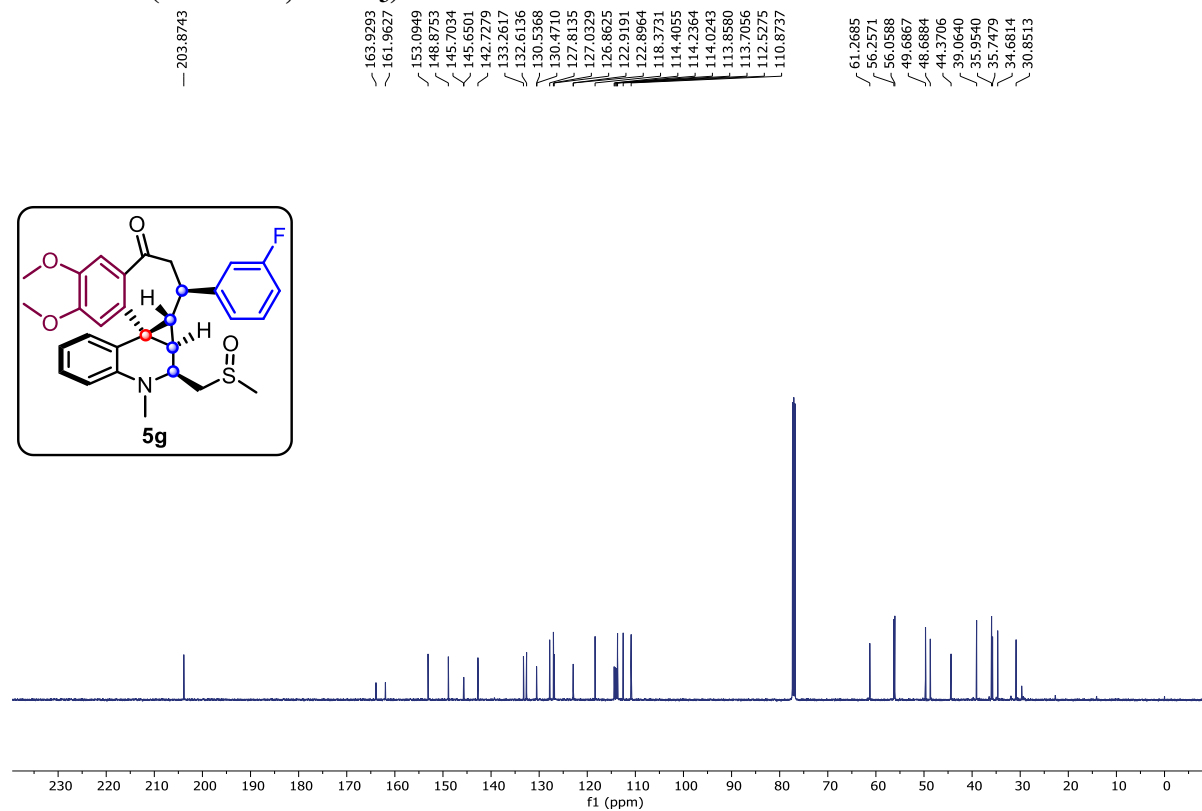

### <sup>19</sup>F NMR (376 MHz, CDCl<sub>3</sub>)

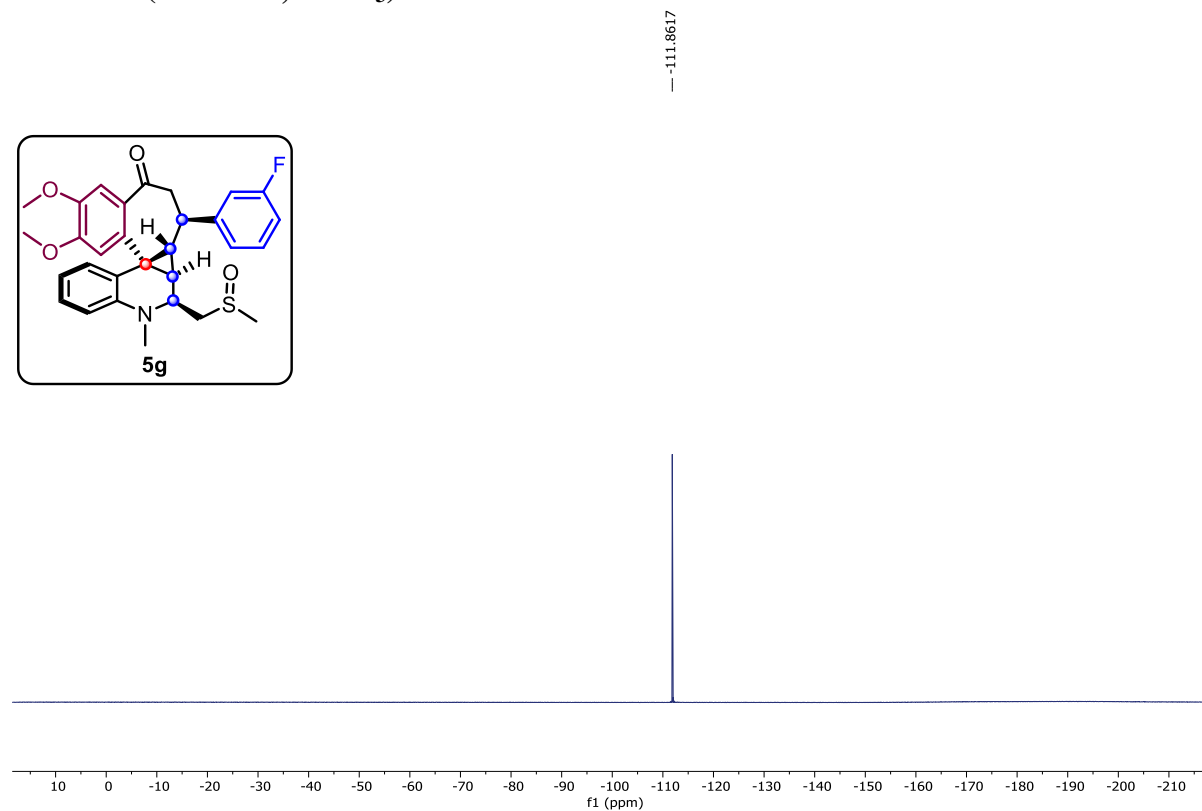

# <sup>1</sup>H NMR (500 MHz, CDCl<sub>3</sub>)

7.2698  
7.1225  
7.1198  
7.1093  
7.1051  
7.0800  
7.0766  
7.0654  
7.0633  
7.0619  
7.0600  
7.0489  
7.0455  
6.8564  
6.8524  
6.8431  
6.8390  
6.7643  
6.7003  
6.6980  
6.6835  
6.6812  
6.6054  
6.6032  
6.5906  
6.5882  
6.5756  
6.5734  
6.4873  
6.4839  
6.4720  
6.4686  
3.9555  
3.9369  
3.9210  
3.9194  
3.9122  
3.8880  
3.7933  
3.7802  
3.2357  
3.2303  
3.2185  
3.2111  
3.2057  
3.1923  
3.1802  
3.1591  
2.8727  
2.8217  
2.8171  
2.7989  
2.7840  
2.7785  
2.3950  
2.3862  
2.3844  
2.3758  
2.1307  
2.1000  
2.0784  
2.0753  
2.0540  
1.8598  
1.7857  
1.7752  
1.7645  
1.7540  
1.2579

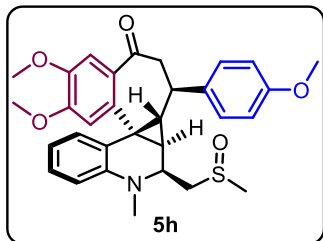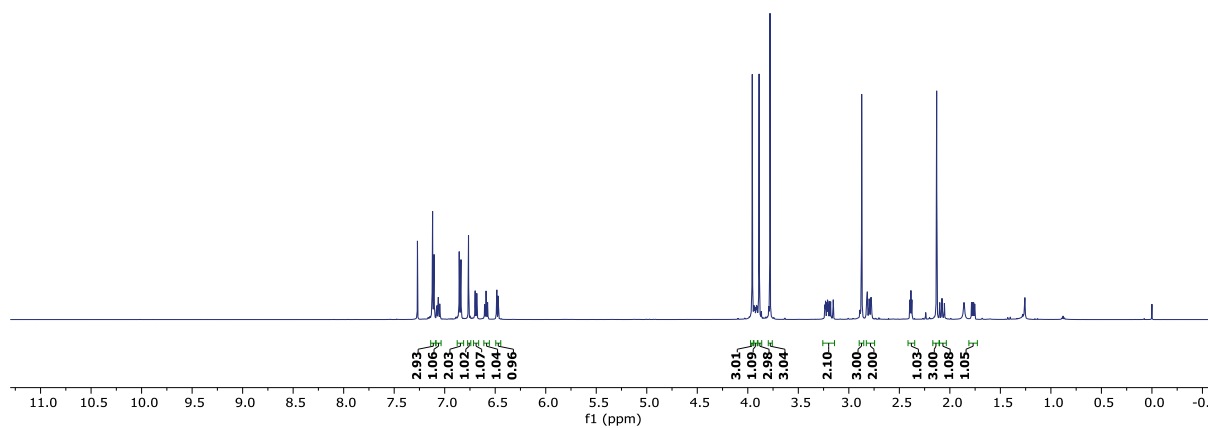

# <sup>13</sup>C NMR (125 MHz, CDCl<sub>3</sub>)

204.6718  
158.6446  
152.9482  
148.7862  
142.6658  
135.0441  
133.3731  
132.8978  
128.2770  
127.7651  
126.9606  
126.9030  
118.2081  
114.2056  
113.6910  
112.3748  
110.8157  
61.6143  
56.2287  
56.0443  
55.3829  
49.7052  
49.3599  
43.8707  
39.1850  
36.2195  
36.0090  
34.5747  
30.9879

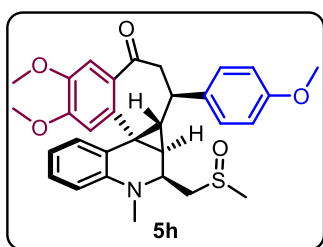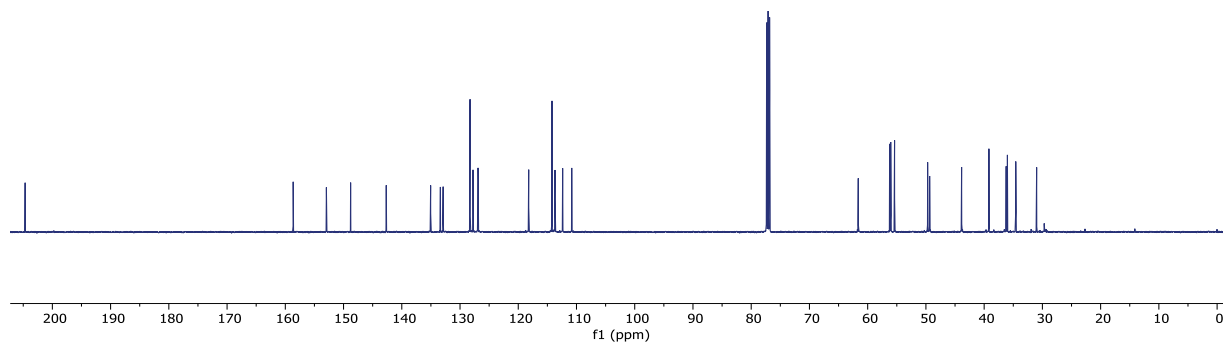



# <sup>1</sup>H NMR (500 MHz, CDCl<sub>3</sub>)

7.3801  
7.3752  
7.3667  
7.3516  
7.3294  
7.3275  
7.3242  
7.3169  
7.3133  
7.3106  
7.3032  
7.3010  
7.2980  
7.2591  
7.2555  
7.2478  
7.2435  
7.2288  
7.2145  
7.2114  
7.2073  
7.2008  
7.1978  
7.1955  
7.0659  
7.0623  
7.0516  
7.0494  
7.0480  
7.0457  
7.0350  
7.0314  
6.6801  
6.6779  
6.6634  
6.6612  
6.5629  
6.5605  
6.5484  
6.5462  
6.5202  
6.5166  
6.5048  
6.5013  
3.2113  
3.1852  
3.1747  
3.1692  
3.1638  
3.1487  
3.1445  
3.1392  
3.1392  
2.8703  
2.8377  
2.8304  
2.2257  
2.2169  
2.2151  
2.2151  
2.2061  
2.1793  
2.0778  
2.0561  
2.0531  
2.0316  
2.0197  
1.8583  
1.8476  
1.8367  
1.8260

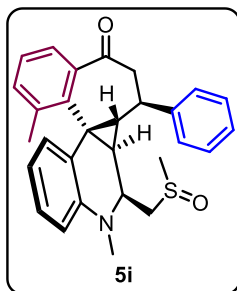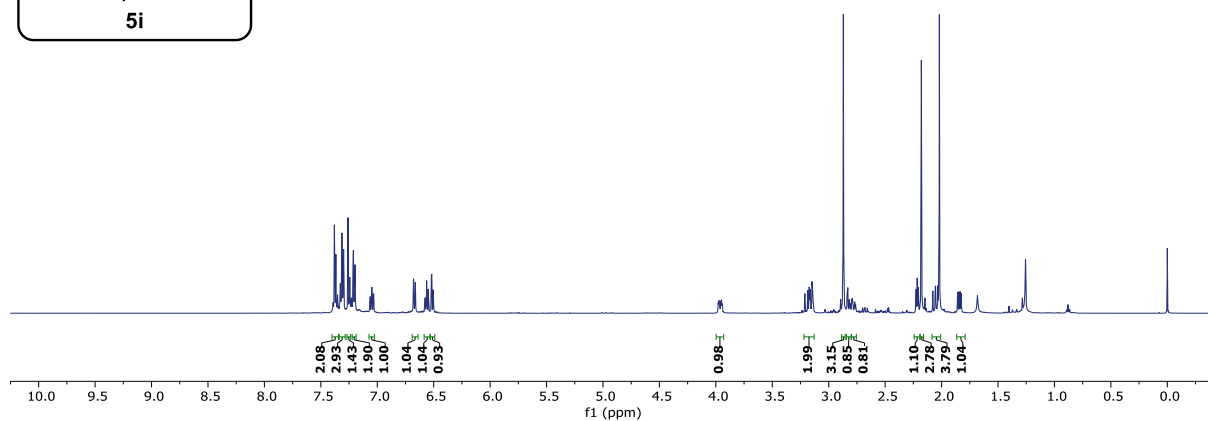

# <sup>13</sup>C NMR (125 MHz, CDCl<sub>3</sub>)

207.0846  
142.7739  
142.6603  
142.1807  
139.2661  
136.0803  
134.2677  
128.9579  
128.2773  
127.4921  
127.1417  
127.1132  
127.0274  
125.6266  
118.8976  
118.8976  
112.4202  
61.4234  
49.5332  
48.9930  
44.7151  
39.1668  
36.0925  
36.0257  
34.6123  
29.7113  
20.3707

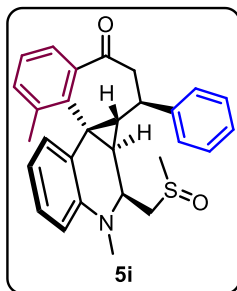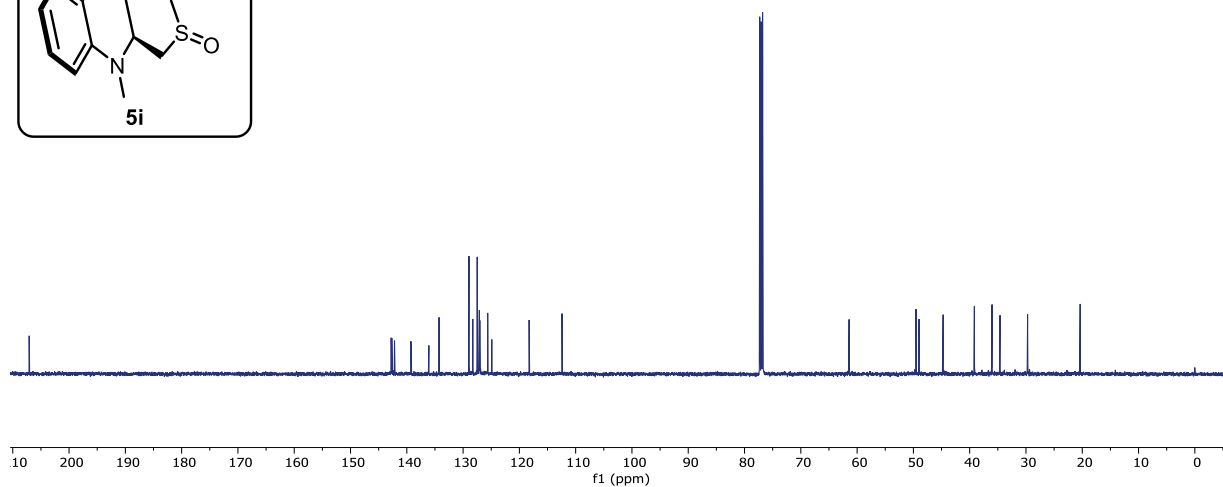

# <sup>1</sup>H NMR (500 MHz, CDCl<sub>3</sub>)

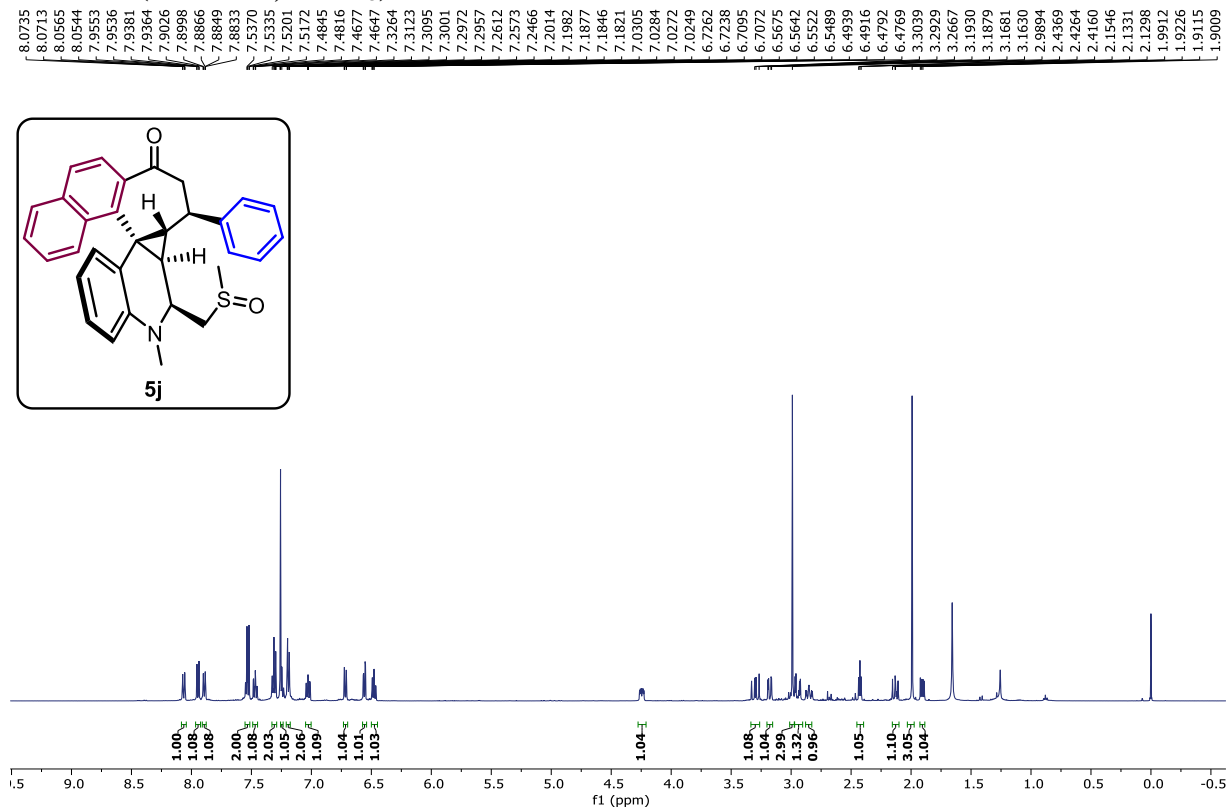

# <sup>13</sup>C NMR (125 MHz, CDCl<sub>3</sub>)

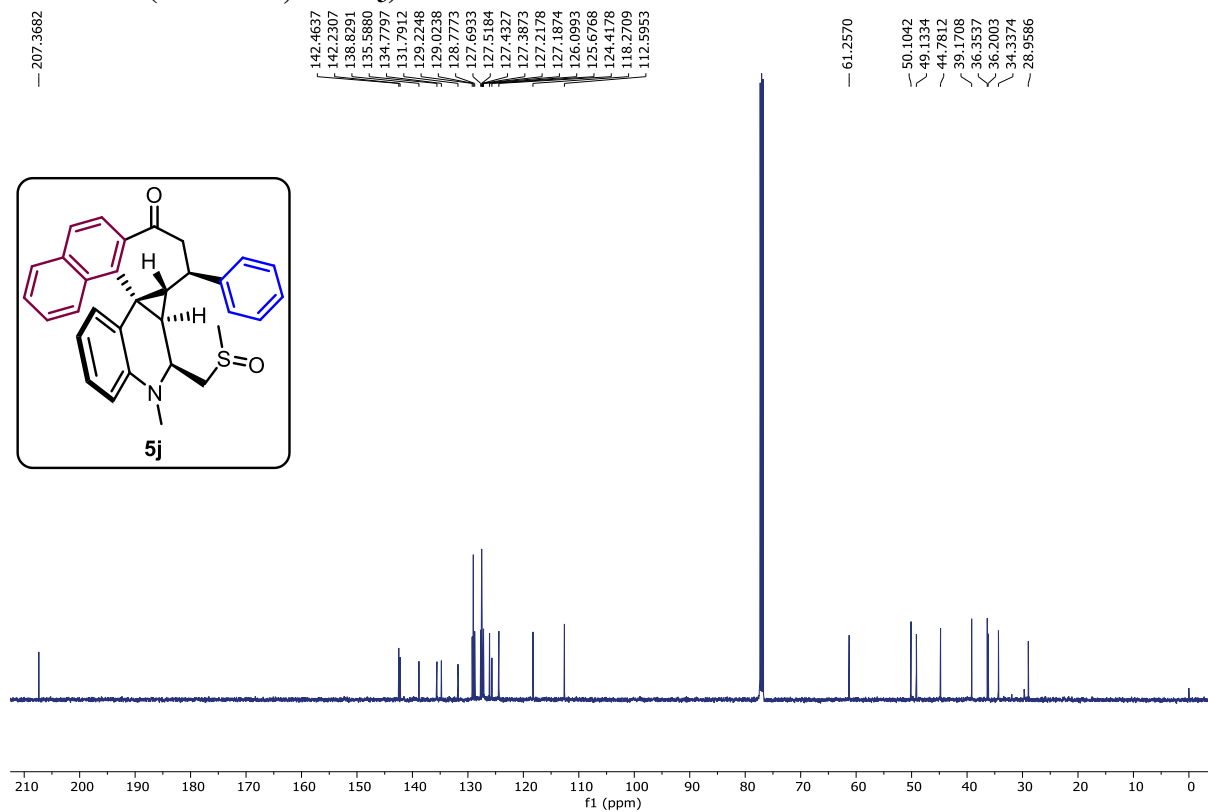

# <sup>1</sup>H NMR (400 MHz, CDCl<sub>3</sub>)

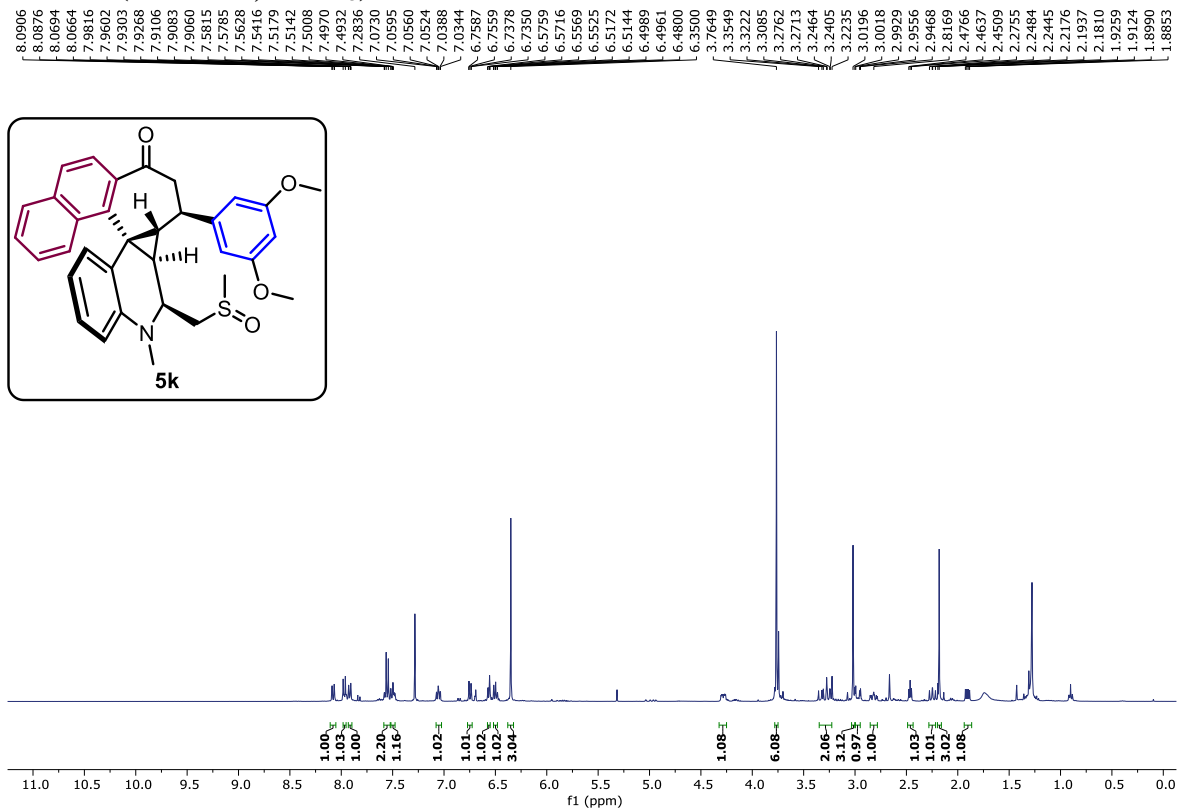

# <sup>13</sup>C NMR (100 MHz, CDCl<sub>3</sub>)

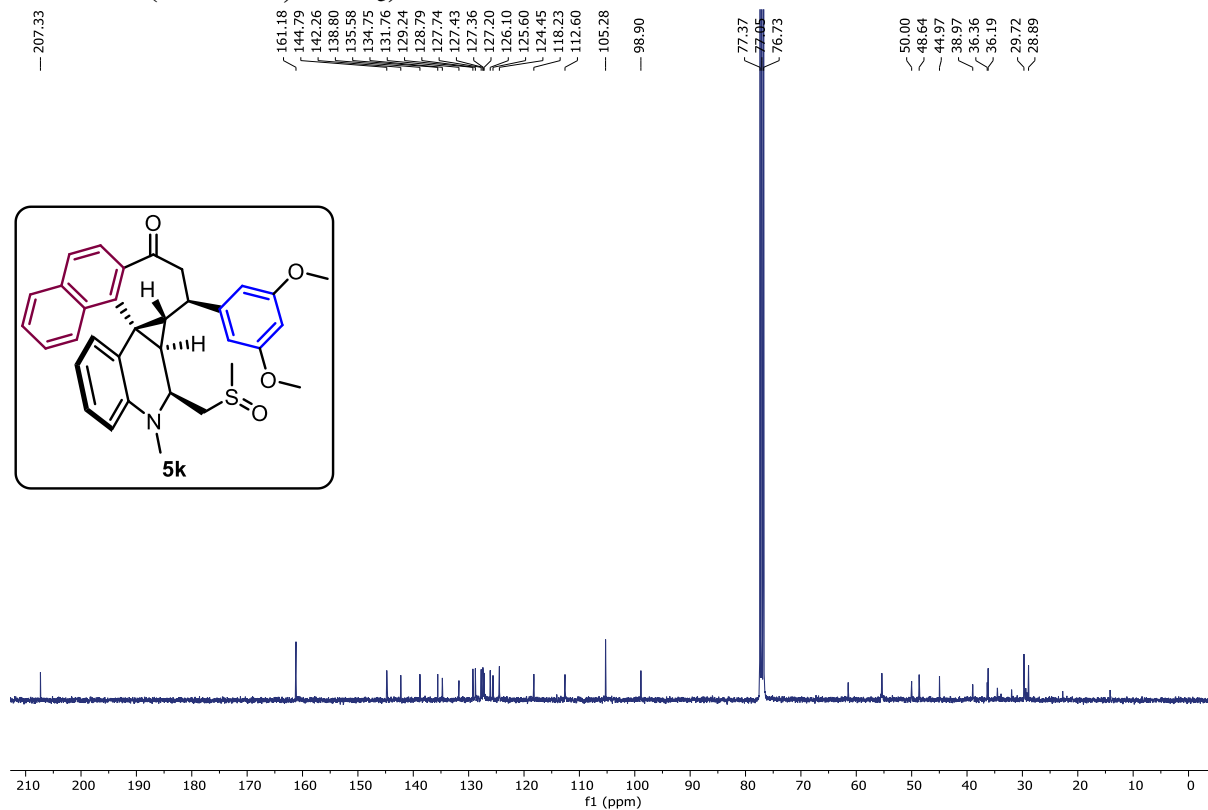

# <sup>1</sup>H NMR (400 MHz, CDCl<sub>3</sub>)

7.5586  
7.5548  
7.5398  
7.5358  
7.4914  
7.4761  
7.4726  
7.4574  
7.4539  
7.4127  
7.4097  
7.3936  
7.3905  
7.3835  
7.3796  
7.3647  
7.3601  
7.3547  
7.3473  
7.3382  
7.3347  
7.3187  
7.2879  
7.2828  
7.2656  
7.2091  
7.1875  
7.1828  
7.1655  
7.0780  
7.0746  
7.0710  
7.0572  
7.0529  
6.7076  
6.7048  
6.6866  
6.6841  
6.6193  
6.6164  
6.6009  
6.5980  
6.5251  
6.5209  
6.5060  
6.5017  
3.1784  
3.1719  
3.1478  
3.1410  
2.8786  
2.8556  
2.3533  
2.3415  
2.3298  
2.3153  
2.2870  
2.2582  
1.9917  
1.9580  
1.9310  
1.9275  
1.9003  
1.8858  
1.8731  
1.8566  
1.7825  
0.9510  
0.9330

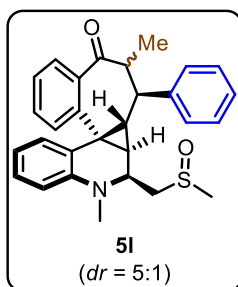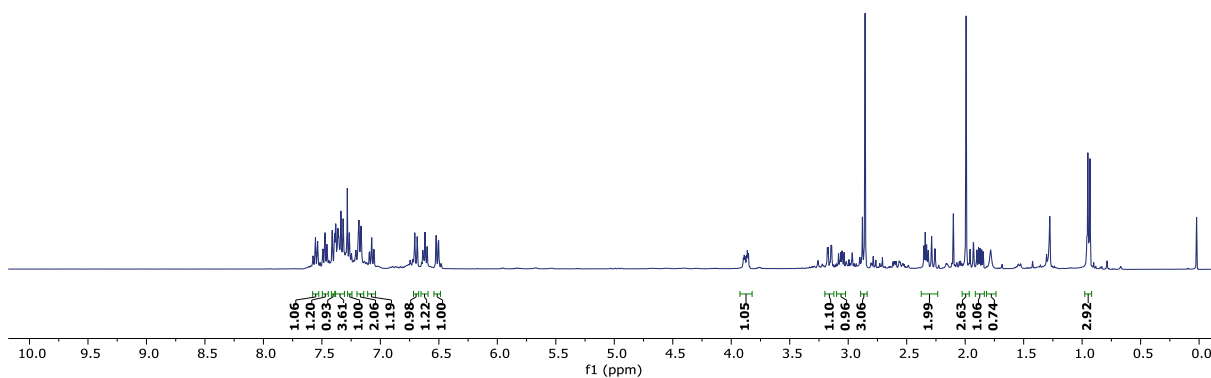

# <sup>13</sup>C NMR (100 MHz, CDCl<sub>3</sub>)

211.7079  
142.7370  
141.7123  
141.0362  
138.6019  
131.8392  
131.2392  
129.0023  
128.9562  
128.1989  
128.0937  
127.8672  
127.8080  
127.1637  
127.0811  
126.9941  
126.9562  
126.1012  
118.3179  
112.4093  
77.3857  
77.0680  
76.7504  
52.7610  
51.5945  
49.5377  
39.1992  
35.9087  
34.4832  
34.1405  
31.6170  
29.7177  
17.8975

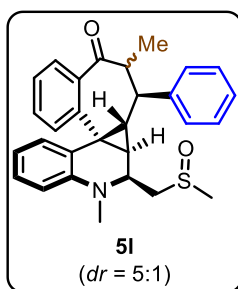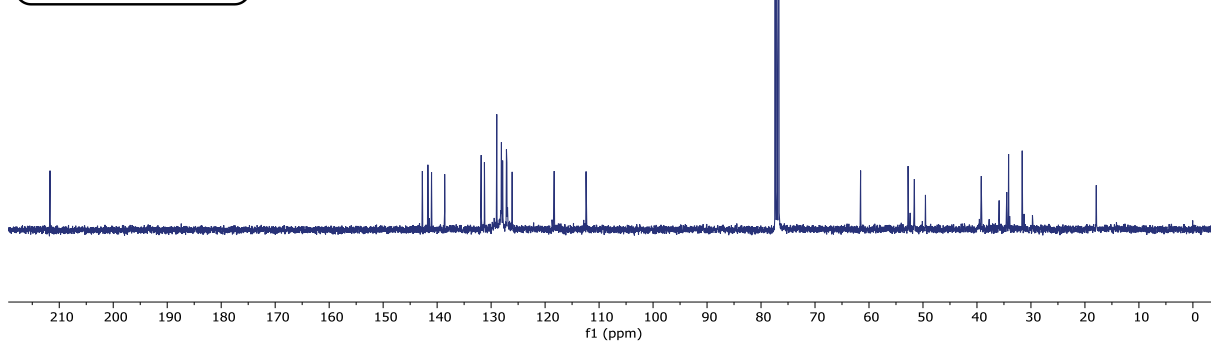

# <sup>1</sup>H NMR (400 MHz, CDCl<sub>3</sub>)

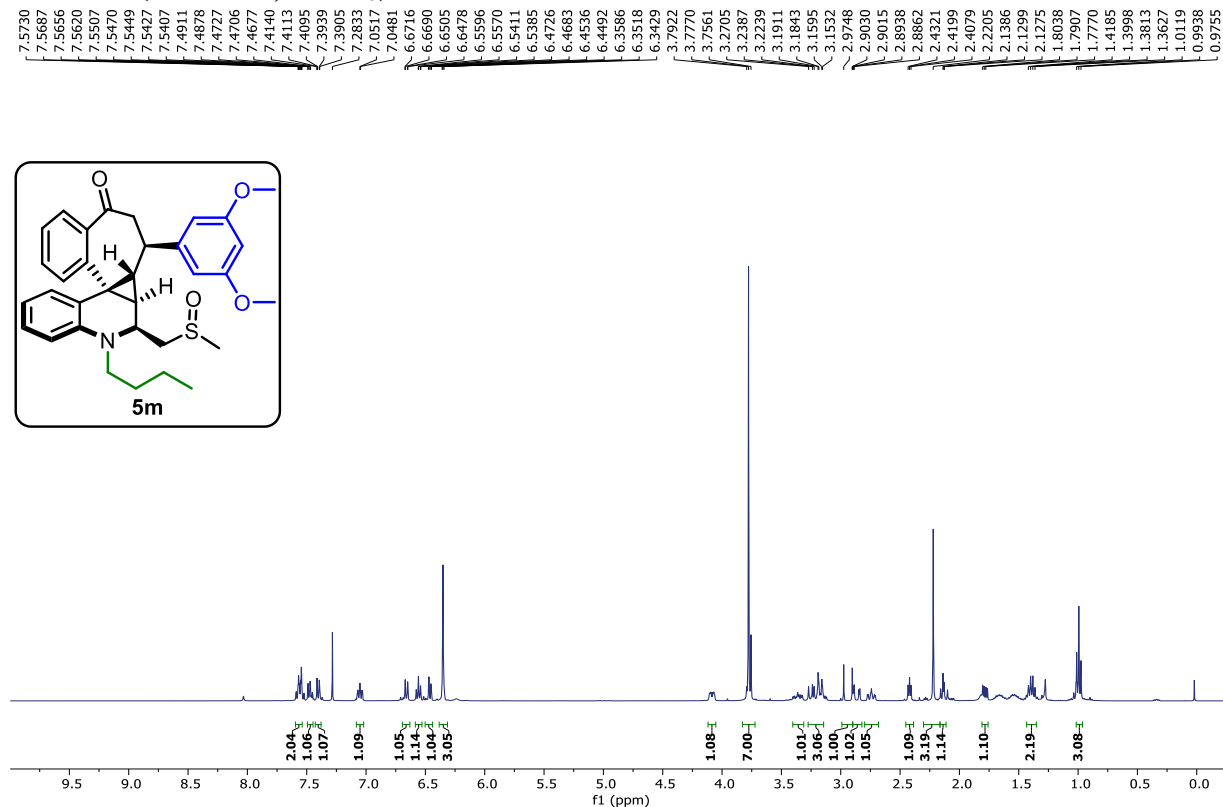

# <sup>13</sup>C NMR (100 MHz, CDCl<sub>3</sub>)

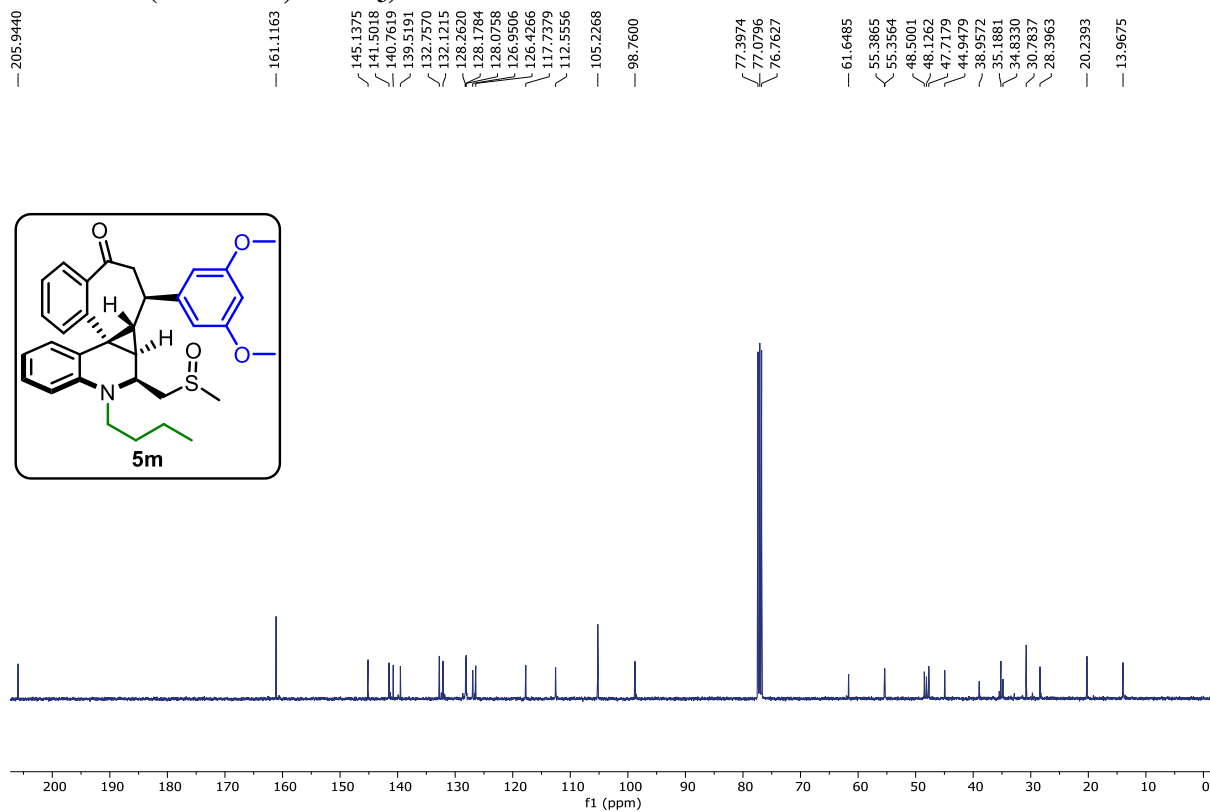

<sup>1</sup>H NMR (400 MHz, CDCl<sub>3</sub>)

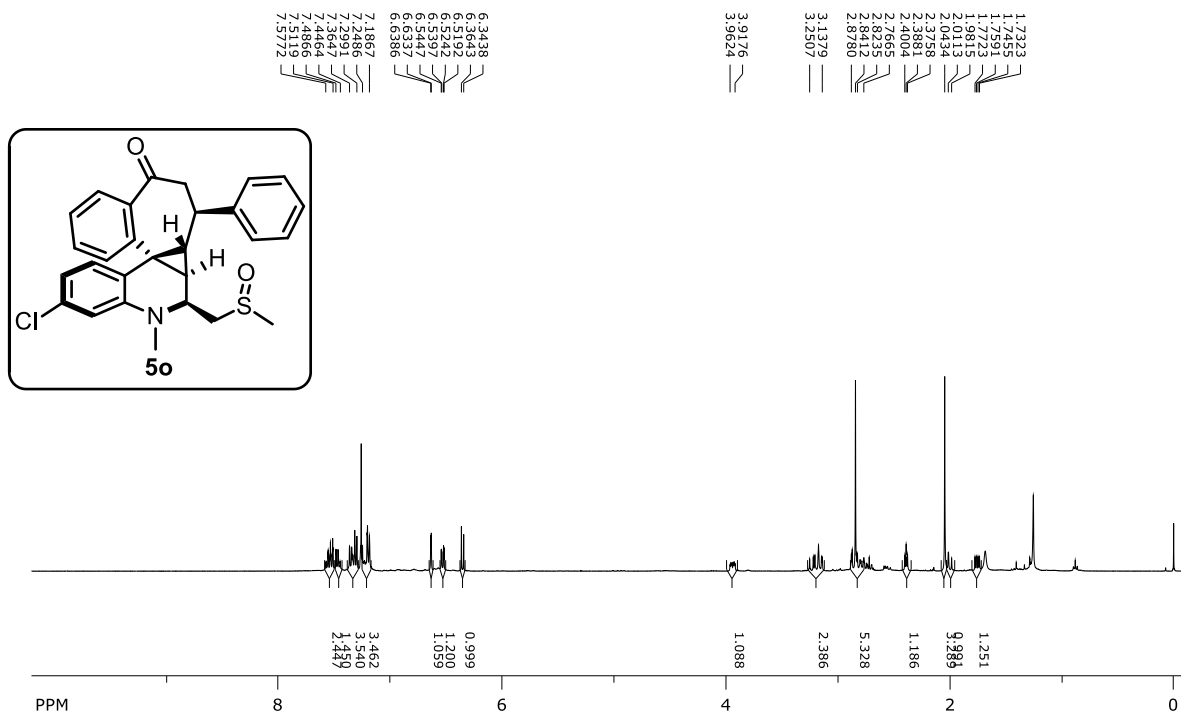

<sup>13</sup>C NMR (100 MHz, CDCl<sub>3</sub>)

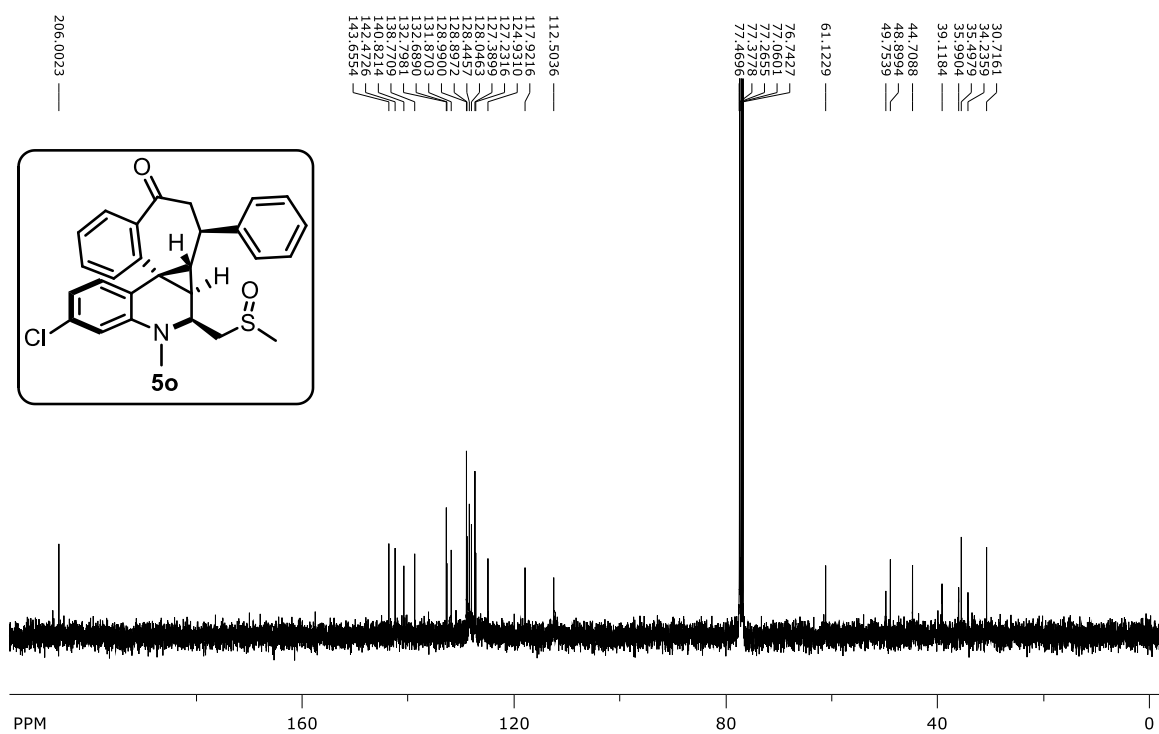

**<sup>1</sup>H NMR (400 MHz, CDCl<sub>3</sub>)**

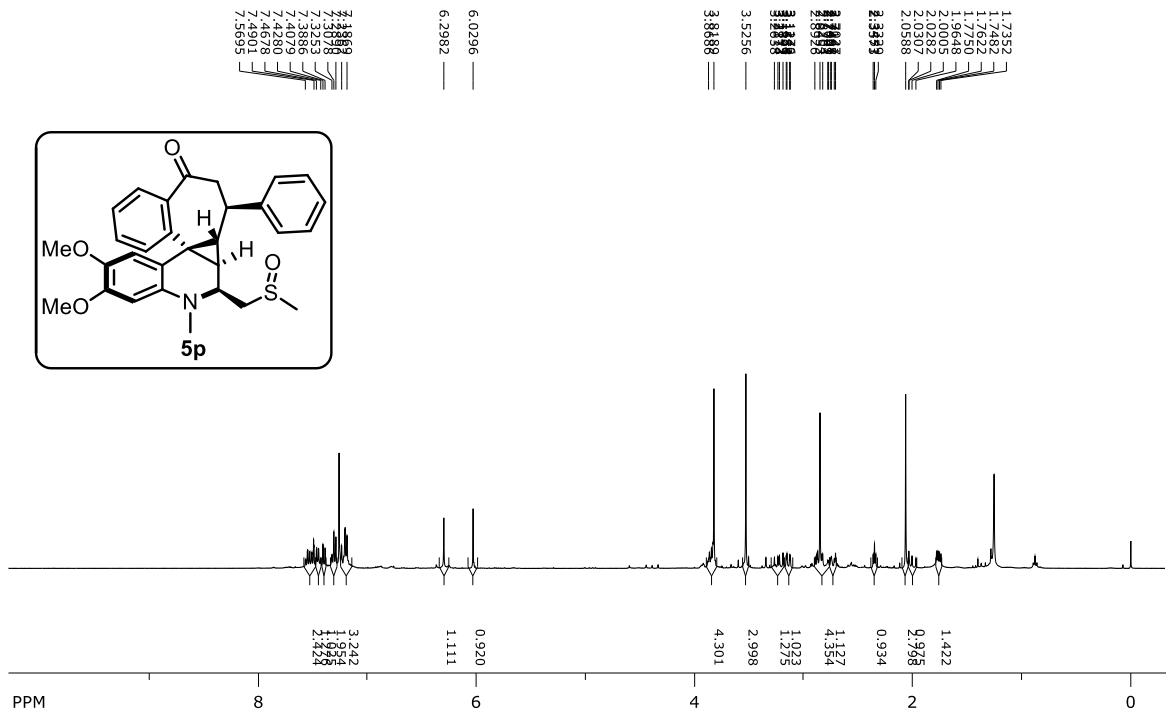

**<sup>1</sup>H NMR (400 MHz, CDCl<sub>3</sub>): expansion of 1.60-4.00 ppm region**

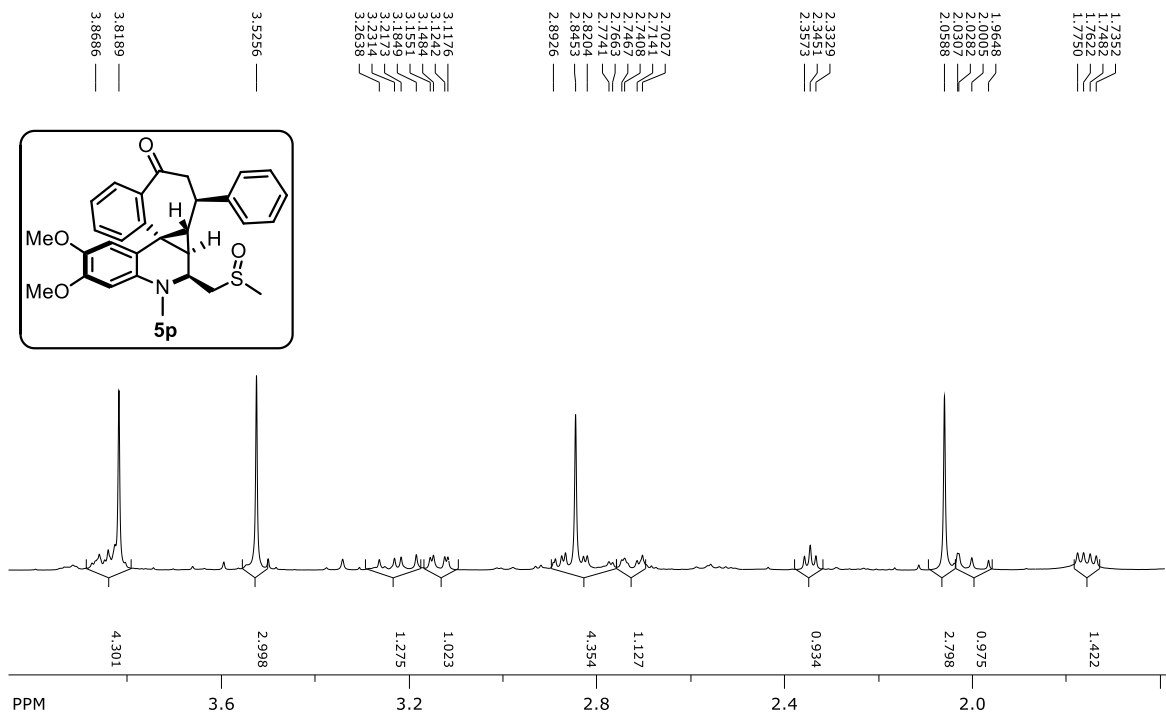

**<sup>13</sup>C NMR (100 MHz, CDCl<sub>3</sub>)**

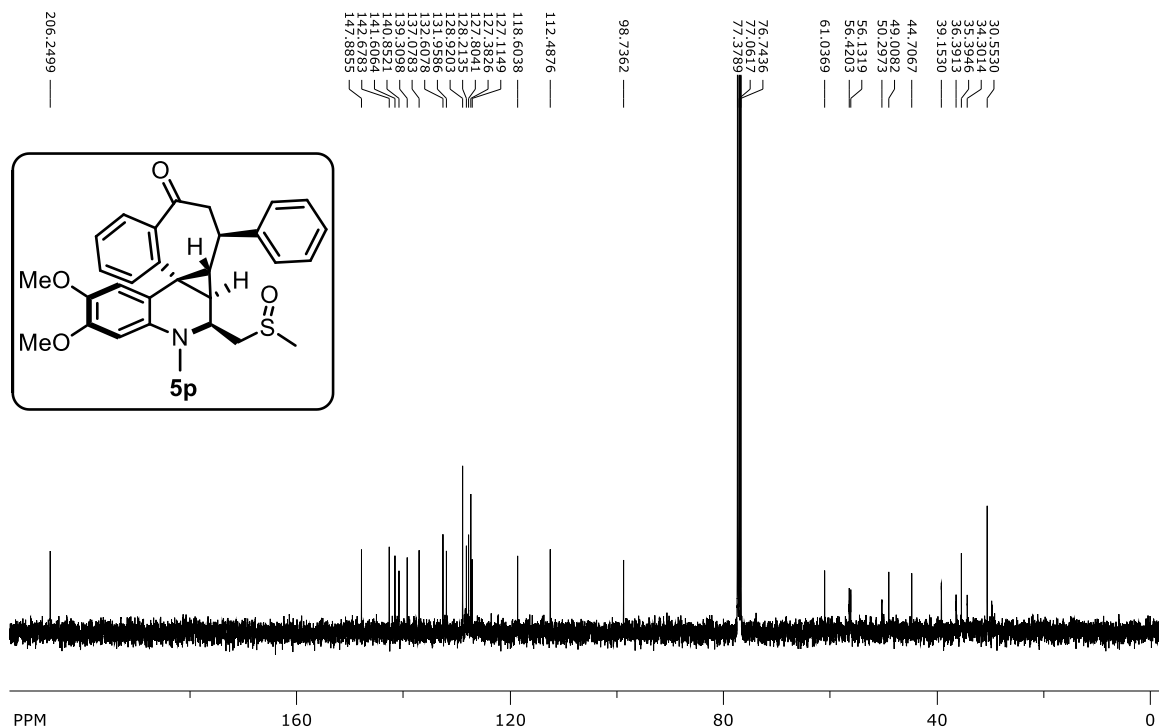

**<sup>1</sup>H NMR (400 MHz, CDCl<sub>3</sub>)**

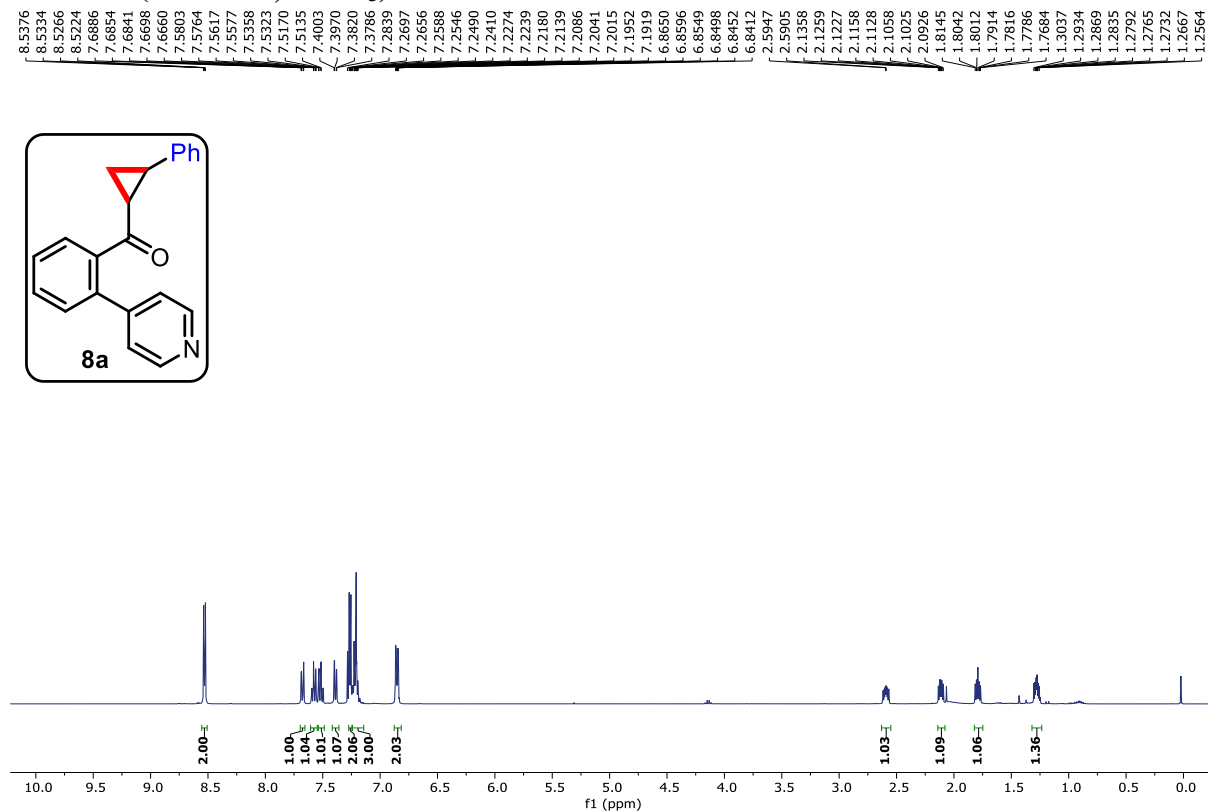



### $^{13}\text{C}$ NMR (100 MHz, $\text{CDCl}_3$ )

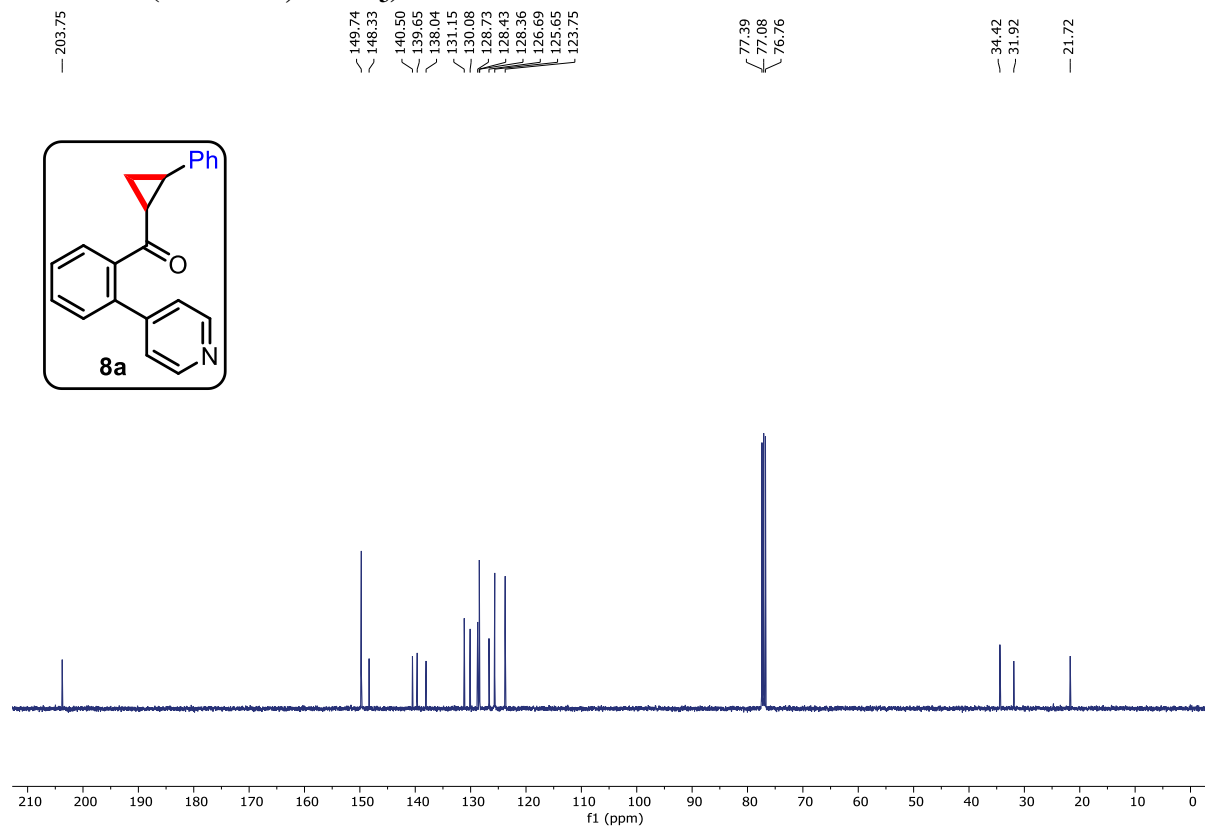

### $^1\text{H}$ NMR (400 MHz, $\text{CDCl}_3$ )

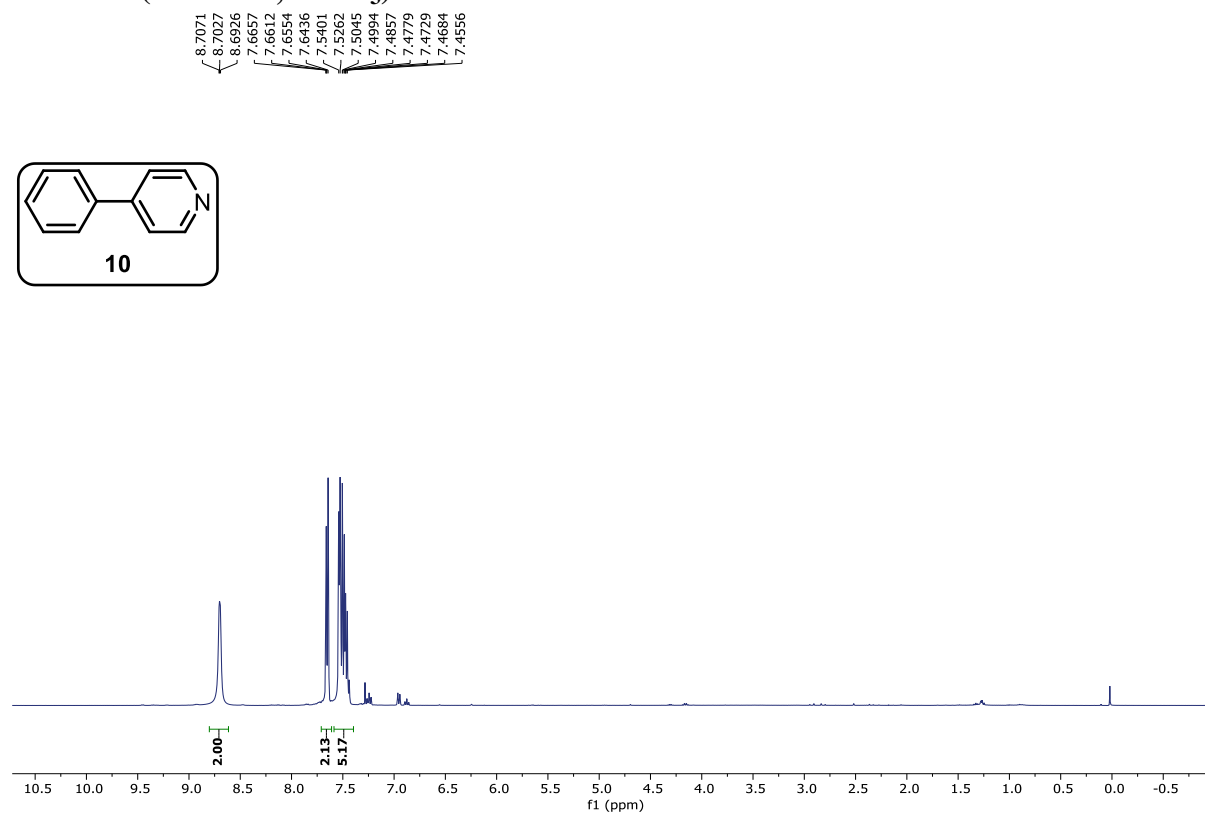

**$^{13}\text{C}$  NMR (100 MHz,  $\text{CDCl}_3$ )**

150.1068  
148.4378

138.0857

129.1532  
129.1241  
127.0132  
121.7999

77.4324  
77.1147  
76.7966

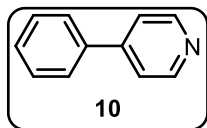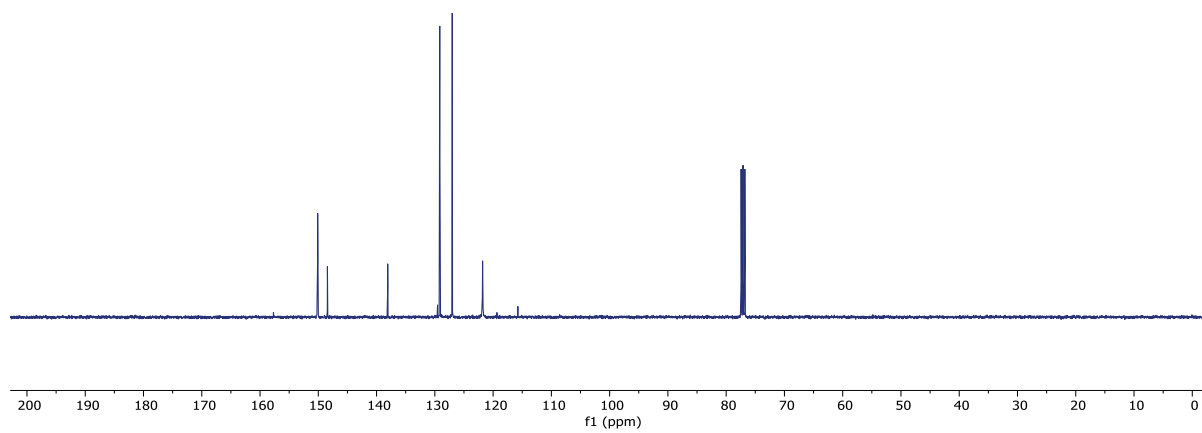

Supplement: d3sc01578e1.pdf [file d3sc01578e1.pdf]
